# Supplementary material for: Readiness of health facilities to provide emergency obstetric care in Papua New Guinea: evidence from a cross-sectional survey
Source: PubMed Central journal article supplement — BMJ Open. 2022 Feb 16;12(2):e050150. doi: 10.1136/bmjopen-2021-050150 (PMC8860041; doi:10.1136/bmjopen-2021-050150), 2022-02-16
Supplement: bmjopen-2021-050150.draft_revisions.pdf [file bmjopen-2021-050150.draft_revisions.pdf]

# BMJ Open

BMJ Open is committed to open peer review. As part of this commitment we make the peer review history of every article we publish publicly available.

When an article is published we post the peer reviewers' comments and the authors' responses online. We also post the versions of the paper that were used during peer review. These are the versions that the peer review comments apply to.

The versions of the paper that follow are the versions that were submitted during the peer review process. They are not the versions of record or the final published versions. They should not be cited or distributed as the published version of this manuscript.

BMJ Open is an open access journal and the full, final, typeset and author-corrected version of record of the manuscript is available on our site with no access controls, subscription charges or pay-per-view fees (<http://bmjopen.bmj.com>).

If you have any questions on BMJ Open's open peer review process please email [info.bmjopen@bmj.com](mailto:info.bmjopen@bmj.com)

# BMJ Open

## Readiness of Health Facilities to Provide Emergency Obstetric Care in Papua New Guinea

|                               |                                                                                                                                                                                                                                                                                                                                    |
|-------------------------------|------------------------------------------------------------------------------------------------------------------------------------------------------------------------------------------------------------------------------------------------------------------------------------------------------------------------------------|
| Journal:                      | <i>BMJ Open</i>                                                                                                                                                                                                                                                                                                                    |
| Manuscript ID                 | bmjopen-2021-050150                                                                                                                                                                                                                                                                                                                |
| Article Type:                 | Original research                                                                                                                                                                                                                                                                                                                  |
| Date Submitted by the Author: | 13-Feb-2021                                                                                                                                                                                                                                                                                                                        |
| Complete List of Authors:     | Hou, Xiaohui ; World Bank Group, Health, Nutrition and Population Global Practice<br>Khan, M. Mahmud ; University of Georgia College of Public Health<br>Pulford, Justin; Liverpool School of Tropical Medicine, ; Papua New Guinea Institute of Medical Research,<br>Saweri, Olga; Papua New Guinea Institute of Medical Research |
| Keywords:                     | OBSTETRICS, International health services < HEALTH SERVICES ADMINISTRATION & MANAGEMENT, Quality in health care < HEALTH SERVICES ADMINISTRATION & MANAGEMENT, Health policy < HEALTH SERVICES ADMINISTRATION & MANAGEMENT                                                                                                         |
|                               |                                                                                                                                                                                                                                                                                                                                    |

SCHOLARONE™  
Manuscripts

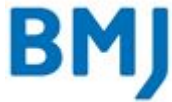

I, the Submitting Author has the right to grant and does grant on behalf of all authors of the Work (as defined in the below author licence), an exclusive licence and/or a non-exclusive licence for contributions from authors who are: i) UK Crown employees; ii) where BMJ has agreed a CC-BY licence shall apply, and/or iii) in accordance with the terms applicable for US Federal Government officers or employees acting as part of their official duties; on a worldwide, perpetual, irrevocable, royalty-free basis to BMJ Publishing Group Ltd ("BMJ") its licensees and where the relevant Journal is co-owned by BMJ to the co-owners of the Journal, to publish the Work in this journal and any other BMJ products and to exploit all rights, as set out in our [licence](#).

The Submitting Author accepts and understands that any supply made under these terms is made by BMJ to the Submitting Author unless you are acting as an employee on behalf of your employer or a postgraduate student of an affiliated institution which is paying any applicable article publishing charge ("APC") for Open Access articles. Where the Submitting Author wishes to make the Work available on an Open Access basis (and intends to pay the relevant APC), the terms of reuse of such Open Access shall be governed by a Creative Commons licence – details of these licences and which [Creative Commons](#) licence will apply to this Work are set out in our licence referred to above.

Other than as permitted in any relevant BMJ Author's Self Archiving Policies, I confirm this Work has not been accepted for publication elsewhere, is not being considered for publication elsewhere and does not duplicate material already published. I confirm all authors consent to publication of this Work and authorise the granting of this licence.

1  
2  
3  
4  
5  
6  
7  
8  
9  
10  
11  
12  
13  
14  
15  
16  
17  
18  
19  
20  
21  
22  
23  
24  
25  
26  
27  
28  
29  
30  
31  
32  
33  
34  
35  
36  
37  
38  
39  
40  
41  
42  
43  
44  
45  
46  
47  
48  
49  
50  
51  
52  
53  
54  
55  
56  
57  
58  
59  
60

# Readiness of Health Facilities to Provide Emergency Obstetric Care in Papua New Guinea

For peer review only

# Readiness of health facilities to Provide Emergency Obstetric Care in Papua New Guinea

**Xiaohui Hou, Ph.D.**

Health, Nutrition, and Population Global Practice  
World Bank  
1818 H. Street. NW, 20433  
Washington DC  
[xhou@worldbank.org](mailto:xhou@worldbank.org)

**M. Mahmud Khan, Ph.D.**

Health Policy and Management Department  
College of Public Health  
University of Georgia  
Wright Hall, Health Sciences Campus, 100 Foster Road, Athens, GA 30602  
[Mahmud.Khan@uga.edu](mailto:Mahmud.Khan@uga.edu)

**Justin Pulford, Ph.D.**

Senior Lecturer  
Department of International Public Health  
Liverpool School of Tropical Medicine  
[justin.pulford@lstmed.ac.uk](mailto:justin.pulford@lstmed.ac.uk)

**Olga P. M. Saweri MSc**

Papua New Guinea Institute of Medical Research (PNGIMR)  
PO Box 60, Goroka, EHP 441, Papua New Guinea  
[olga.saweri@gmail.com](mailto:olga.saweri@gmail.com)

Declarations of interest: none

Corresponding Author: **M. Mahmud Khan, Ph.D.**

**Key words**

Maternal Health, Emergency Obstetric Care, Papua New Guinea

Total word count: 4135

### Credit author statement

**Xiaohui Hou:** Conceptualization, Methodology, Supervision, Project Administration, Resources, Writing-Original Draft, Writing – review & editing

**M. Mahmud Khan:** Conceptualization, Methodology, Supervision, Formal Analysis, Writing-Original Draft, Writing – review & editing

**Justin Pulford:** Conceptualization, Methodology, Data Curation, Data Validation, Writing-Review & Editing.

**Olga P. M. Saweri:** Data Curation, Data Validation, Writing-Review & Editing

### Details of funding source

This work was funded by World Bank's Trust Fund supported by Australia's Department of Foreign Affairs and Trade.

## Abstract

### Objective

To understand and measure the readiness of health facilities in Papua New Guinea to provide emergency obstetric care.

### Methods

Data were collected via a national, cross-sectional health facility survey including all upper-level facilities (levels 5-7) and sixty lower-level (levels 3-4) facilities operational in Papua New Guinea at the time of survey. We defined four categories of readiness to provide obstetric care services: (1) facility readiness to provide clinical services; (2) availability of family planning items; (3) availability of maternal and neonatal equipment and materials; and (4) the ability of the facility to provide emergency obstetric care services.

### Results

40% of level 3 and 4 facilities were not able to provide Basic Emergency Obstetric Care (BEmOC). Even among higher level facilities (levels 5, 6 and 7), 10% of facilities were not able to perform one or more of the necessary functions required to be considered a BEmOC provider. 11% of level 3 and 4 health facilities were able to provide comprehensive emergency obstetric care (CEmOC) as compared to 83% of higher level facilities.

### Conclusion

Given the high fertility rate in PNG, lack of obstetric first aid and basic EmOC at level 3 and 4 facilities, the first level inpatient service providers, is a major concern. To improve access to emergency obstetric care, most of the level 3 and 4 facilities should be upgraded to provide at least BEmOC services.

### Strengths and limitations of this study

- All the hospitals and randomly selected health centers in Papua New Guinea were surveyed;
- The quality of care evaluation method follows the Donabedian approach.
- The readiness and quality of providing obstetric care were assessed by constructing relevant indicators;
- The study did not try to connect the services availability and readiness measures with health outcomes of the population at the subnational level

For peer review only



## Introduction

Emergency Obstetric Care (EmOC) is a cost-effective intervention vital to avert common adverse pregnancy and/or birth outcomes, which significantly contribute to maternal mortality in poor resource settings [1-4]. Basic Emergency Obstetric Care (BEmOC) alone can avert a significant proportion of maternal deaths and up to 40% of neonatal deaths [5]. A global assessment found that BEmOC facilities are consistently not available in sufficient numbers, both in countries with high and moderate levels of maternal mortality [6]. Comprehensive Emergency Obstetric Care (CEmOC) availability, which includes the provision of caesarean and blood transfusion services in addition to the key functions included in BEmOC, is also low in many low and middle income countries [7].

Maternal and child health remains a key priority area in Papua New Guinea (PNG) [8]; however, persistent maternal and neonatal deaths reflect numerous deficiencies. Maternal mortality in PNG is approximately 500 per 100 000 live births [9, 10], while neonatal mortality is 28 per 1000 live births [11]. Further, the World Health Organization model ranks PNG 130<sup>th</sup> in the world in terms of maternal mortality rate (MMR), which indicates a relatively high-risk of adverse outcomes in terms of maternal and child health [12]. The 2016-2018 PNG Demographic and Health Survey (DHS) report indicates that only 17% of pregnancies received a prenatal visit in the first trimester and 49% had four or more prenatal visits over the whole pregnancy [13]. On average 55% of deliveries were supervised by a trained health worker at a health facility between 2012-2017 [14].

Given the high MMR and low access to delivery services, it is important to assess the readiness of health facilities in the provision of emergency obstetric care in PNG. PNG has a relatively high total fertility rate [13], which implies that the demand for maternal health services will continue to increase rapidly, emphasizing the urgent need to strengthen maternal healthcare service delivery.

The purpose of this study is to measure health facility readiness to provide obstetric care and the quality of such services provided in PNG, through conducting a national health facility survey and deriving relevant indicators. These measures will inform specific approaches policy makers can adopt for improving the access and quality of obstetric care services.

## Methods

### *Conceptual Framework*

We use the Donabedian's approach to analyze the quality of obstetric care services offered through health care facilities in PNG. The Donabedian's approach is widely adopted to evaluate quality of care. It defines three broad components to understand quality differences across health care facilities [15]. These components are structure, process, and outcomes. The components are linearly linked. Structure measures affect processes and then processes affect outcomes, as shown in figure 1. This study will evaluate 'structure' and 'process' related to obstetric care services. The structure and process variables considered focus on the quality and quantity of the service-type produced. The health outcome of obstetric care services is demonstrated by maternal mortality and morbidity, which are both high in PNG.

To evaluate the provision of quality of obstetric care services, health facilities should have specific infrastructural characteristics and resources conducive for the provision of obstetric services. Some of the structural measures are quite general, related to provision of any clinical services, such as maternal services. In addition, specific personnel, supplies and drugs must be available at the facility level to be

1  
2  
3 able to offer the right type of services based on the clinical needs of patients. Availability of structural  
4 variables defines the “readiness” of the facility to provide effective health care services. Readiness alone  
5 does not necessarily imply actual provision of services. The infrastructural aspects act as the foundation  
6 for the provision of services, but relevant health care resources must be combined in the right proportions  
7 to be able to offer services to patients whenever needed. The process variables, therefore, reflect ability  
8 to offer different types of obstetric care services and functions.  
9

### 10 11 *Study Setting*

12  
13 PNG is remarkably diverse with respect to geography, language, and infrastructure. The country is divided  
14 into 22 provinces across four regions (Highlands, Momase and Southern, and the New Guinea Islands).  
15 Most of the country’s 8 million people live in rural or peri-urban communities and are faced with  
16 significant challenges with regard to accessing equitable health, education and economic opportunities.  
17

18  
19 PNG has a government-funded health system throughout much of the country. It is supplemented by  
20 government-subsidized health services provided by various Christian missions. Overall, it is estimated  
21 that churches provide 47 percent of primary health services, particularly in rural areas [16].  
22

23  
24 Health facilities are categorized by the number and cadre of health workers employed and the services  
25 they provide; and are detailed in the National Health Services Standard (NHSS) of the Government of PNG  
26 (GoPNG) [17]. The levels of health facilities in PNG are numbered 1 through 7, where levels 1 and 2 provide  
27 basic primary health care, specifically outpatient services only. Level 3 health facilities, or health centers,  
28 also provide basic inpatient services for deliveries and minor ailments requiring observation. Level 4  
29 health facilities, district and rural hospitals, provide general admissions, limited clinical support services  
30 including basic pharmacy and laboratory services, and depending on the employment of a medical officer,  
31 may provide obstetric and surgical intervention services. Level 5 to 7 health facilities provide secondary  
32 and tertiary health services as well as clinical support services, including pharmacy, laboratory, and  
33 radiology. The single level 7 health facility, the Port Moresby General Hospital, is the largest and most  
34 advanced health care facility of PNG, it employs the largest concentration of health care workers and  
35 provides comprehensive health care services.  
36  
37

### 38 39 *Survey Design*

40  
41 We conducted a health sector efficiency survey at 73 health facilities in 2015. All operational level 5 to 7  
42 health facilities nationwide, at the time of data collection (N=19) were surveyed, including the national  
43 referral hospital (Port Moresby General Hospital), the three regional hospitals, and 15 provincial hospitals.  
44 Sampling for level 3 and level 4 health facilities followed a two-step selection process to capture an equal  
45 amount of public- and church-run facilities. In step one, between six (New Guinea Islands) and eight  
46 (Southern, Highlands, and Momase) districts were randomly selected per region. In step two, the largest  
47 government- and church-administered health facilities (one of each type based on outpatient numbers  
48 per annum as reported by the National Health Information System) were purposely selected per district.  
49 This sampling procedure allowed selection of 30 publicly run and 30 church-run facilities from the selected  
50 districts; however, in reality not all selected facilities were operational. Where possible, closed health  
51 facilities were replaced by open ones within the same district. In some selected districts there were no  
52 functional level 3 or 4 facilities, resulting in less than 60 facilities surveyed (N=54). Figure 2 shows the  
53 location of the health facilities surveyed. The provinces shaded in green indicate where the survey was  
54  
55  
56  
57

1  
2  
3 carried out. The red squares represent level 5 to 7 health facilities, while the blue squares represent levels  
4 3 and 4.  
5

### 6 *Survey Procedure*

7  
8 The survey comprised of a health facility assessment and costing instrument as well as interviews with  
9 healthcare providers, inpatients, and outpatients. Each instrument is detailed in the survey report [18].  
10 Briefly, the health facility assessment collected information on various operational aspects of each health  
11 facility, while the costing instrument detailed expenditure on human resources, equipment, and  
12 consumables utilized for the provision of healthcare services. Both of which were completed with health  
13 facility managers and administrators. For the interviews with healthcare providers and patients (both  
14 inpatients and outpatients) written informed consent was obtained prior to interviewing. The healthcare  
15 provider interview included information on education, experience, services provided and general  
16 knowledge questions. The patient interviews covered socio-demographic information as well as patient  
17 experience and satisfaction. We conducted between one and five healthcare provider interviews, and  
18 between five and ten patient interviews per health facility. All instruments were completed by a team of  
19 5 trained enumerators, who spent three to five days surveying each health facility. In total, 73 health  
20 facility assessments were completed, 72 costing instruments, 385 healthcare provider interviews, 385  
21 inpatient interviews and 514 outpatient interviews.  
22  
23  
24

### 25 *Public Involvement*

26  
27 Stakeholder consultation were involved in the design and early dissemination of this research. During the  
28 feasibility stage, priority of research questions, choice of outcome measures, and methods were informed  
29 by discussions with stakeholders involving representatives from the National Department of Health, UN  
30 agencies, academics and other development partners in PNGs. The preliminary findings were also  
31 discussed with representatives from the National Department of Health, Provincial Health Authorities,  
32 hospitals and development partners in a stakeholder consultation workshop held in Port Moresby, PNG.  
33  
34

### 35 *Ethics approval*

36  
37 The study was approved by the PNG Institute of Medical Research (IMR) Institutional Review Board (IRB)  
38 and the PNG Medical Research Advisory Committee (MRAC). The following approval numbers were  
39 allocated to the study: IRB No. 1414, 7 August 2014; MRAC No 14.26, 10 November 2014.  
40  
41  
42

### 43 *Assessing readiness to provide maternal health services*

44  
45 We first examine the overall readiness of health facilities (structure variables) in the provision of clinical  
46 services and then examined three aspects related to obstetric services (process variables). Four categories  
47 of readiness are defined (1) facility readiness to provide clinical services; (2) availability of family planning  
48 items; (3) availability of maternal and neonatal equipment and materials; and for process measure, we  
49 evaluated the ability of the facility to provide emergency obstetric care services. If a functional equipment  
50 or instrument is present in the facility, we consider that the equipment or instrument is available for use.  
51 Availability of drugs and supplies is defined as having the item in stock at the time of the survey. Although  
52 the facility assessment asked about stockouts in the previous one month, the definition of availability  
53 considered current availability.  
54  
55  
56  
57

1  
2  
3 Structure variable type 1: facility readiness to provide clinical services  
4

5 General facility-specific conditions and resources required to ensure the provision of quality services in a  
6 safe and effective manner as listed in Table 1.  
7

8 Structure variable type 2: family planning items  
9

10 Three supply categories were examined, oral pills, family planning injections and condoms, as listed in  
11 Table2. For each supply category, an index was constructed to show the average availability of the items.  
12

13 Structure variable type 3: maternal and neonatal equipment and materials  
14

15 Essential items required to provide pregnancy termination and other maternal health services as listed  
16 in Table 3. The items can be grouped into two subcategories: items and supplies related to antenatal care  
17 (ANC) and items and supplies related to maternal or neonatal service.  
18

19 Process variables: Ability to provide emergency obstetric care services  
20

21 Health care facilities that offer delivery of babies and other pregnancy-related services can be categorized  
22 into three groups depending upon the “signal functions” they are able to perform [19]. Signal functions  
23 have been defined to understand the ability of health facilities to offer routine to more complex obstetric  
24 services. If a facility has the capacity to administer antibiotic injections, oxytocics, and anticonvulsants  
25 (availability of the required injections and presence of relevant personnel to administer the injections),  
26 the facility is considered an “Obstetric First Aid” facility. A BEmOC facility is able to do all the functions  
27 required in an Obstetric First Aid facility plus the capacity to do assisted vaginal delivery, and the ability  
28 for manual removal of placenta. Comprehensive Emergency Obstetric Care (CEmOC) facilities are able to  
29 perform all the functions of a BEmOC plus ability to conduct caesarean section, and capacity to do safe  
30 blood transfusion. Note that all these signal functions are narrowly focused on the ability to perform  
31 specific functions pregnant women need at the time of delivery. Ability to perform the functions are  
32 defined by the availability and functionality of equipment needed, drugs, and personnel.  
33  
34  
35

### 36 *Data Analysis* 37

38 The analysis has used the facility level data to derive the readiness indicators and ability to perform signal  
39 functions for each facility in the survey using stata version 12. The results are presented as descriptive  
40 tables (Tables 1-4) to indicate the proportion of facilities having the instruments or able to perform the  
41 specific functions.  
42

43 An equally weighted index was constructed based on the availability of the items included in each of the  
44 categories of service delivery. It reflects the percent of all readiness aspects or variables satisfied by the  
45 health facilities in a specific category. For example, if a facility reports having an instrument, a value of 1.0  
46 was assigned for the facility for that equipment. The availability index was constructed to show the  
47 percent of listed equipment and items available in each of the facility categories. For example, if the  
48 antenatal care (ANC) items availability index is 65 for level 3 and 4 facilities, it means that the facilities on  
49 the average had 65 percent of all the ANC equipment and items considered in the analysis.  
50  
51

## 52 **Results** 53

### 54 *Facility readiness to provide clinical services* 55 56 57

1  
2  
3 Table 1 reports facility readiness in the provision of services. As shown, 95% of level 5 to 7 facilities were  
4 connected to the main electric supply grid but only about a third of level 3 and 4 facilities. However, more  
5 than 80% of all facilities connected to the electric supply experienced blackout at least for some time in  
6 the week before the survey. All level 5 to 7 facilities had functional backup generators, while the  
7 percentage of level 3 and 4 facilities with backup generators was 76% for church-run facilities and 48% for  
8 public facilities. Half of the level 3 and 4 facilities with backup generators reported problems in operating  
9 the generator in the previous month.  
10  
11

12 If supply line and water tanks are considered, all level 5 to 7 facilities and 83% of level 3 and level 4 public  
13 health facilities and 84% of level 3 and level 4 church health facilities reported having access to water on  
14 the day of the survey. However, less than 10% of level 3 and 4 facilities were connected with a supply line.  
15 Only 45% of level 3 and 4 public facilities had water connection to the delivery room (and water availability  
16 on the day of the survey) compared to 72% at church-run facilities.  
17  
18

19 A significant share of health facilities, 62%, 44% and 38% of level 3 and 4 public, level 3 and 4 church, and  
20 level 5 and 6 facilities, respectively, experienced water shortages in 2014. The survey asked facility  
21 respondents whether the facility was responsible for maintaining the water supply system and it was  
22 observed that about 45% of public level 3-4 facilities were responsible for maintaining the water supply  
23 system. The proportions were 64% for church-run level 3 and 4 facilities and 68% for level 5 to 7 facilities.  
24  
25

26 Both level 3 and 4 public and church-run health facilities show low readiness score for service delivery  
27 (Table 1). Readiness indexes were 40.3 for level 3 and 4 public sector facilities, 48.6 for level 3 and 4  
28 church-run facilities, 84.6 for level 5 and 6 facilities, and 100 for the level 7 facility.  
29

### 30 *Family Planning Items*

31 Table 2 presents the availability of family planning products and supplies in surveyed health facilities. The  
32 availability index of family planning items was 81.6 for level 3 and 4 public sector health facilities, 84.0 for  
33 level 3 and 4 church-run facilities, and 88.9 for level 5 and 6 facilities. Non-availability of family planning  
34 injections in the level 7 facility reduced the overall index of family planning item availability for the facility  
35 to 66.7. Since there is only one facility at level 7, non-availability of even a single item significantly reduces  
36 the overall index.  
37  
38

### 39 *Maternal and Neonatal Equipment and Materials*

40 A significant number of health facilities lacked very basic maternal and neonatal equipment as shown in  
41 Table 3. The index values for the availability of ANC-related equipment and supplies were 71.4 and 81.6 for  
42 level 3 and 4 public- and church-run facilities, respectively. The index was 81.1 for level 5 and 6 facilities and  
43 100 for level 7 facility. The indexes of availability of delivery and neonatal equipment and supplies (excluding  
44 ANC-related equipment) were worse in level 3 and level 4 facilities, 64.7 and 76.0 respectively. The indexes  
45 were 89.9 for level 5 and 6 facilities.  
46  
47  
48  
49

### 50 *Ability to provide emergency obstetric care services*

51 Table 4 indicates that 18.6% of level 3 and 4 public health facilities and 20% of church health facilities  
52 providing maternal health services were not able to offer basic obstetric first aid. 40% of level 3 and 4  
53 facilities were not able to perform the functions necessary under the Basic Emergency Obstetric Care  
54  
55  
56  
57

category (BEmOC). Even among higher level facilities (levels 5, 6 and 7), 10% of facilities were not able to perform one or more of the necessary functions required to be considered a BEmOC provider.

If the signal functions for comprehensive emergency obstetric care are considered, only about 11% of level 3 and 4 health facilities were found to be CEmOC units. Only 15% of level 3 and 4 facilities had the capacity to manage a caesarean section or do blood transfusion. The majority of facilities at all levels reported the capacity to remove a placenta manually (78% for level 3 and 4 public health facilities, 88% for level 3 and 4 church-run facilities, and 100% of level 5 to 7 facilities).

## Discussion

The overall health facility infrastructure condition in PNG is poor. Most facilities reported the need for major building repairs and emphasized the lack of adequate toilets, stable electrical supply, and consistent water supply. Most of the level 3 and 4 health facilities require better connectivity to electricity and clean water supply. One significant concern is the number of health facilities that did not have running water in the facility's delivery room. The quantity and quality of different types of service provision crucially depends on the facility's readiness to provide the clinical services. Overall, level 3 and 4 facilities, both public and church-run, scored quite low on the readiness index, which describes the extent to which facilities are capable of providing services. The survey also revealed the need for improving the supply of basic medical items to level 3 and 4 public health facilities. Level 3 and 4 public facilities show lower availability of different medical items compared to availability in church-run facilities.

PNG shows comparatively low values in terms of readiness in the provision of health services. Comparison of health facility readiness across countries is often tricky because of differences in the level and comprehensiveness of facilities in different countries of the world. A World Bank report [20] indicates that 98 percent of public hospitals in Indonesia had electricity; in Laos, the index of basic amenities was reported as 64 percent [21] compared to 58 percent for PNG (weighted mean of the values in table 1).

Access to family planning services are still limited in PNG. The results from the survey are consistent with the most recent findings from the PNG DHS. One quarter of currently married women (26%) have an unmet need for family planning, and only 59% of currently married women are satisfied with the demand of family planning. Among those who have received family planning, about 9 in 10 users obtained their modern family planning supplies from a public (government) source. Therefore, there is an urgent need to strengthen the government health facilities, especially at lower levels, in the provision of family planning items and services.

While 83% of level 5 to 7 facilities were found to be CEmOC providers, the fact that about a fifth were not able to provide comprehensive emergency obstetric care is a major concern given these are higher level referral facilities. The number of level 3 and 4 facilities surveyed was high enough to provide some national level estimates. Using the proportions of CEmOC facilities at different levels, the number of facilities providing comprehensive obstetric care in the country would be about 50. Even if we assume balanced geographic distribution of the facilities, an emergency obstetric case will have to travel 53 km each way, on average, to reach a CEmOC facility. The distance to the nearest CEmOC is so large that for many emergency cases this is virtually synonymous of not having access to comprehensive emergency obstetric care. In order to reduce maternal mortality and morbidity significantly, it is essential to reduce the average distance to the nearest CEmOC facility[22] implying that PNG will have to upgrade a significant number of levels 4 and 5 facilities to be able to provide comprehensive emergency obstetric care. Using geographical



1  
2  
3 information systems and geographical modelling tools to optimize the location and referral can help  
4 improve timely access[23].  
5

6 All facilities at level 3 or above should be able to provide obstetric first aid and BEmOC. To improve access  
7 to emergency obstetric care, most of the level 3 and 4 facilities should be upgraded to BEmOC facilities or  
8 better. The survey of facilities indicated that 20% of facilities at levels 3 and 4 were not prepared to provide  
9 even obstetric first aid and 40 percent were not ready to provide BEmOC. Despite this low readiness,  
10 equipping some targeted facilities at these levels to perform blood transfusions and cesarean section  
11 deliveries should be able to increase availability of CEmOC from 10% to 60%. Although maternal and child  
12 health is a priority area, PNG has not allocated enough resources to achieve improved access to MCH  
13 services. PNG spends more than 4.3% of its GDP on health (about \$109 per capita in PPP dollars). Total  
14 health expenditure is not low compared to other countries with similar level of income[24]. However, a  
15 significant part of health resources, including human resources, particularly doctors, are concentrated in  
16 a few major hospitals. Therefore, the resource allocation at the lower level health facilities, including level  
17 3 and level 4 health facilities, are not sufficient. Reallocation of public sector resources to lower level  
18 health care facilities are needed to improve the access of obstetric care and other preventive services.  
19  
20  
21

22 Public financial management is another challenge in PNG with subnational facilities constantly facing cash  
23 shortages[25]. Government of Papua New Guinea may consider allocating funds to facilities, both public  
24 and church facilities, based on quantities of priority health services delivered rather than paying them  
25 based on their personnel and administrative expenses [26]. While such output or performance based  
26 financing outcomes highly depend on how the schemes are implemented, evidence in low and middle  
27 income countries shows that the performance can be improved through links to financial incentives and  
28 other sources of motivation [27]. From the demand side, past research has found that providing pregnant  
29 women with health vouchers to ensure that they have financial protection for accessing services has  
30 increased utilization of health services [28]. The payments received through the vouchers will also  
31 encourage facilities to become more sensitive to the needs of pregnant women and would have incentives  
32 to invest to become fully functional EmOC providers.  
33  
34  
35

### 36 ***Study Limitations***

37  
38 Several limitations of the study should be mentioned here. First, it is not possible to indicate overall  
39 geographic access to primary health care services in PNG using the survey data because the study did not  
40 collect information from level 1 and 2 health facilities. However, these facilities do not provide maternal  
41 health services although some basic services like family planning and ANC can potentially be organized at  
42 these levels. Second, the survey is not a nationally representative survey of level 3 and 4 facilities. The  
43 survey design selected fully functional level 3 and 4 facilities in target provinces and the definition of fully  
44 functional led to the choice of facilities that showed relatively high level of utilization. Therefore, if  
45 anything, the results are likely to be a significant overestimation of degree of readiness of the facilities in  
46 the provision of maternal and obstetric care services. Even with this favorable selection of facilities, the  
47 percent of facilities able to perform BEmOC and CEmOC was quite low at levels 3 and 4 implying that the  
48 availability of obstetric care services could be significantly worse than what has been reported here. Third,  
49 the study did not try to connect the services availability and readiness measures with health outcomes of  
50 the population at the subnational level. In PNG, even the national level estimates of mortality and  
51 morbidity are considered unreliable and subnational level estimates would suffer from even higher degree  
52 of error in estimation. In any case, facility level information clearly indicates that many of the functional  
53  
54  
55  
56  
57

1  
2  
3 facilities are not ready to provide obstetric health services and a significant proportion of facilities lack  
4 medical equipment, instruments and supplies for the provision of maternal health related essential  
5 services.  
6

### 7 **Conclusions**

8  
9 Inability of a health facility, irrespective of whether it is a primary, secondary and tertiary care facility, to  
10 provide obstetric care is an important concern for any health care system. It is especially true for a country  
11 like PNG where maternal and infant mortality rates are still high alongside a high fertility rate. Improving  
12 and equipping targeted health facilities to improve the readiness of delivering the BEmOC and CEmOC are  
13 required to reduce the maternal mortality rate in PNG.  
14  
15  
16  
17  
18  
19  
20  
21  
22  
23  
24  
25  
26  
27  
28  
29  
30  
31  
32  
33  
34  
35  
36  
37  
38  
39  
40  
41  
42  
43  
44  
45  
46  
47  
48  
49  
50  
51  
52  
53  
54  
55  
56  
57  
58  
59  
60

For peer review only



Table 1. Service Provision Readiness Index, by Facility Level

| Readiness indicators                                                      | Level 3 and 4 |     |             |     | Level 5 and 6 |      | Level 7    |      |
|---------------------------------------------------------------------------|---------------|-----|-------------|-----|---------------|------|------------|------|
|                                                                           | Public        | %   | Church      | %   | N             | %    | N          | %    |
| Electricity connected to supply grid                                      | 10            | 34% | 7           | 28% | 17            | 94%  | 1          | 100% |
| Backup generator                                                          | 14            | 48% | 19          | 76% | 18            | 100% | 1          | 100% |
| Electricity availability (supply or generator)                            | 20            | 69% | 21          | 84% | 18            | 100% | 1          | 100% |
| Blackout last week                                                        | 8             | 28% | 6           | 24% | 15            | 83%  | 0          | 0    |
| Problem last month running generator due to fuel shortage                 | 8             | 28% | 10          | 40% | 3             | 17%  | 0          | 0    |
| Water from main line                                                      | 2             | 7%  | 3           | 12% | 15            | 83%  | 1          | 100% |
| Water shortage last year                                                  | 18            | 62% | 11          | 44% | 7             | 39%  | 0          | 0    |
| Water available for use by health care providers                          | 24            | 83% | 21          | 84% | 18            | 100% | 1          | 100% |
| Water available in delivery room                                          | 13            | 45% | 18          | 72% | 18            | 100% | 1          | 100% |
| Facility does direct blood transfusion                                    | 3             | 10% | 3           | 12% | 16            | 89%  | 1          | 100% |
| Blood transfusions done last month                                        | 3             | 10% | 3           | 12% | 18            | 100% | 1          | 100% |
| Facility has designated space for clinicians to provide service           | 20            | 69% | 20          | 80% | 18            | 100% | 1          | 100% |
| Facility has on-call room or space for health care providers to take rest | 3             | 10% | 11          | 44% | 10            | 56%  | 1          | 100% |
| Facility has telephone or shortwave radio                                 | 14            | 48% | 14          | 56% | 15            | 83%  | 1          | 100% |
| Facility has ambulance                                                    | 26            | 90% | 24          | 96% | 17            | 94%  | 1          | 100% |
| Ambulance out of service last year                                        | 11            | 38% | 10          | 40% | 6             | 33%  | 0          | 0    |
| Facility has other vehicles                                               | 8             | 28% | 5           | 20% | 18            | 100% | 1          | 100% |
| Facility has operation theater                                            | 8             | 28% | 9           | 36% | 18            | 100% | 1          | 100% |
| <b>Index of readiness</b>                                                 | <b>40.3</b>   |     | <b>48.5</b> |     | <b>84.6</b>   |      | <b>100</b> |      |

Table 2. Availability of Family Planning by Facility Category

| Family planning, vaccine and other items | Level 3 and 4 |             |             |             | Level 5 and 6 |                    | Level 7     |              |
|------------------------------------------|---------------|-------------|-------------|-------------|---------------|--------------------|-------------|--------------|
|                                          | Public        | % of Public | Church      | % of Church | Public        | % of Level 5 and 6 | Public      | % of Level 7 |
| Family planning items                    |               |             |             |             |               |                    |             |              |
| Oral pills                               | 26            | 90%         | 21          | 84%         | 17            | 94%                | 1           | 100%         |
| FP injections                            | 22            | 76%         | 22          | 88%         | 15            | 83%                | 0           | 0%           |
| Condoms                                  | 23            | 79%         | 20          | 80%         | 16            | 89%                | 1           | 100%         |
| <b>Index of FP items</b>                 | <b>81.6</b>   |             | <b>84.0</b> |             | <b>88.9</b>   |                    | <b>66.7</b> |              |

Note: FP = family planning;

Table 3. Availability of Maternal Health-Related Equipment and Supplies

| ANC, delivery and neonatal equipment and supplies                          | Level 3 and 4 |             |              |             | Level 5 and 6 |      | Level 7       |      |
|----------------------------------------------------------------------------|---------------|-------------|--------------|-------------|---------------|------|---------------|------|
|                                                                            | Public        | % of Public | Church       | % of Church | Public        | %    | Public        | %    |
| Foetal stethoscope (or monitor)                                            | 27            | 93%         | 25           | 100%        | 14            | 78%  | 1             | 100% |
| Stethoscope and blood pressure cuff                                        | 22            | 76%         | 25           | 100%        | 16            | 89%  | 1             | 100% |
| Tape measure                                                               | 23            | 79%         | 22           | 88%         | 16            | 89%  | 1             | 100% |
| Scale                                                                      | 28            | 97%         | 25           | 100%        | 16            | 89%  | 1             | 100% |
| Ultrasound machine (and gel)                                               | 28            | 97%         | 25           | 100%        | 17            | 94%  | 1             | 100% |
| Facility has at least two skilled birth attendants covering 24 hours a day | 21            | 72%         | 19           | 76%         | 18            | 100% | 1             | 100% |
| Delivery kit (instruments, supplies)                                       | 25            | 86%         | 25           | 100%        | 18            | 100% | 1             | 100% |
| Stethoscope                                                                | 10            | 34%         | 11           | 44%         | 15            | 83%  | 1             | 100% |
| Partograph                                                                 | 11            | 38%         | 13           | 52%         | 14            | 78%  | 1             | 100% |
| Pelvic procedure instruments such as speculum                              | 18            | 62%         | 22           | 88%         | 16            | 89%  | 1             | 100% |
| Delivery light                                                             | 24            | 83%         | 24           | 96%         | 18            | 100% | 1             | 100% |
| Sterilizer                                                                 | 15            | 52%         | 16           | 64%         | 13            | 72%  | 1             | 100% |
| Vacuum extractor                                                           | 14            | 48%         | 21           | 84%         | 18            | 100% | 1             | 100% |
| Forceps                                                                    | 25            | 86%         | 25           | 100%        | 18            | 100% | 1             | 100% |
| Manual vacuum aspirator/suction bulb                                       | 27            | 93%         | 25           | 100%        | 17            | 94%  | 1             | 100% |
| Resuscitation bag, newborn                                                 | 4             | 14%         | 4            | 16%         | 15            | 83%  | 1             | 100% |
| Eye drops or ointment for newborn                                          | 27            | 93%         | 25           | 100%        | 18            | 100% | 1             | 100% |
| Needles and syringes                                                       | 28            | 97%         | 25           | 100%        | 18            | 100% | 1             | 100% |
| Sterile C-section instrument kits                                          | 28            | 97%         | 25           | 100%        | 18            | 100% | 1             | 100% |
| Cord supplies for newborn: clamps, ties, scissors                          | 2             | 7%          | 5            | 20%         | 12            | 67%  | 1             | 100% |
| IV sets, including sterilized needle and tube                              | 27            | 93%         | 25           | 100%        | 17            | 94%  | 1             | 100% |
| IV fluids, including normal saline and ringer lactate                      | 29            | 100%        | 25           | 100%        | 18            | 100% | 1             | 100% |
| <b>Index ANC item availability</b>                                         | <b>71.41</b>  |             | <b>81.60</b> |             | <b>81.11</b>  |      | <b>100.00</b> |      |
| <b>Index maternal and neonatal items availability (excluding ANC)</b>      | <b>64.66</b>  |             | <b>76.00</b> |             | <b>89.93</b>  |      | <b>100.00</b> |      |

Table 4. Percentage of Health Facilities Providing Obstetric First Aid, Basic Emergency Obstetric Care, and Comprehensive Emergency Obstetric Care

| Level of EmOC services provided by facilities                               | Level 3 and 4 public<br>% (n) | Level 3 and 4 church<br>% (n) | Level 5 to 7<br>% (n) | Total<br>% (n) |
|-----------------------------------------------------------------------------|-------------------------------|-------------------------------|-----------------------|----------------|
| <b>Obstetric first aid</b>                                                  |                               |                               |                       |                |
| Have the capacity to administer antibiotics, Oxytocics, and anticonvulsants | 81% (22)                      | 80% (20)                      | 94% (17)              | 84% (59)       |
| <b>BEmOC</b>                                                                |                               |                               |                       |                |
| Have the capacity to do assisted vaginal delivery                           | 63% (17)                      | 72% (18)                      | 94% (17)              | 74% (52)       |
| Have the ability to use three drugs plus do vacuum and forceps delivery     | 63% (17)                      | 60% (15)                      | 89% (16)              | 69% (48)       |
| Have the ability for manual removal of placenta                             | 78% (21)                      | 88% (22)                      | 100% (18)             | 87% (61)       |
| <b>CEmOC</b>                                                                |                               |                               |                       |                |
| Have the ability to manage caesarean section                                | 15% (4)                       | 16% (4)                       | 100% (18)             | 37% (26)       |
| Have the capacity to do safe blood transfusion                              | 15% (4)                       | 20% (5)                       | 94% (17)              | 37% (26)       |
| Have the capacity to use all drugs plus services listed above               | 11% (3)                       | 12% (3)                       | 83% (15)              | 30% (21)       |

## References:

1. Islam, M.T., et al., *Improvement of coverage and utilization of EmOC services in southwestern Bangladesh*. Int J Gynaecol Obstet, 2005. **91**(3): p. 298-305; discussion 283-4.
2. Turab, A., et al., *Improved accessibility of emergency obstetrics and newborn care (EmONC) services for maternal and newborn health: a community based project*. BMC Pregnancy Childbirth, 2013. **13**: p. 136.
3. Chavula, K., et al., *Readiness of hospitals to provide Kangaroo Mother Care (KMC) and documentation of KMC service delivery: Analysis of Malawi 2014 Emergency Obstetric and Newborn Care (EmONC) survey data*. J Glob Health, 2017. **7**(2): p. 020802.
4. Ameh, C.A., et al., *The effectiveness of training in emergency obstetric care: a systematic literature review*. Health Policy Plan, 2019. **34**(4): p. 257-270.
5. Lee, A.C., et al., *Care during labor and birth for the prevention of intrapartum-related neonatal deaths: a systematic review and Delphi estimation of mortality effect*. BMC Public Health, 2011. **11 Suppl 3**(Suppl 3): p. S10.
6. Paxton, A., et al., *Global patterns in availability of emergency obstetric care*. Int J Gynaecol Obstet, 2006. **93**(3): p. 300-7.
7. Banke-Thomas, A., et al., *Assessing emergency obstetric care provision in low- and middle-income countries: a systematic review of the application of global guidelines*. Glob Health Action, 2016. **9**: p. 31880.
8. Government of Papua New Guinea, *National Health Plan 2011–2020, Volume 1: Policies and Strategies*. June 2010,.
9. Mola, G. and B. Kirby, *Discrepancies between national maternal mortality data and international estimates: The experience of Papua New Guinea*. Reproductive health matters, 2013. **21**: p. 191-202.
10. Robbers, G., et al., *Maternal and newborn health indicators in Papua New Guinea – 2008–2018*. Sexual and Reproductive Health Matters, 2019. **27**(1): p. 52-68.
11. PNG National Department of Health, *Health Information Systems*. 2019.
12. *Trends in Maternal Mortality: 2000 to 2017*. 2019, WHO: Geneva.
13. National Statistical Office (NSO) [Papua New Guinea] and ICF, *Papua New Guinea Demographic and Health Survey 2016-18*. Port Moresby, Papua New Guinea, and Rockville, Maryland, USA: NSO and ICF. 2019.
14. *Papua New Guinea Demographic and Health Survey 2016-18*. 2019, NSO and ICF: Port Moresby, Papua New Guinea, and Rockville, Maryland, USA.
15. Donabedian, A., *Evaluating the Quality of Medical Care*. The Milbank Quarterly, 2005 **83**(4): p. 691-729 (reprint from 44(3): 166-203, 1966).
16. NDOH, *Christian Health Services Technical Assistance Mission Report*. . 2013, National Department of Health: Port Moresby, Papua New Guinea.
17. Papua New Guinea and ICF, *Papua New Guinea Demographic and Health Survey 2016-18*. Port Moresby, Papua New Guinea, and Rockville, Maryland, USA: NSO and ICF. 2019.
18. Hou, X.K., M. Mahmud; Pulford, Justin; Saweri, Olga; Demir, Ibrahim; Haider, Rifat; Ahmed, Shakil;, *Service delivery by health facilities in Papua New Guinea : report based on a countrywide health facility survey (English)*. . 2018, The WorldBank Group.
19. *Monitoring emergency obstetric care: a handbook*. 2009, Geneva: World Health Organization.

- 1  
2  
3 20. World Bank, *Universal Maternal Health Coverage? Assessing the Readiness of Public Health*  
4 *Facilities to Provide Maternal Health Care in Indonesia*. Washington, DC: World Bank. 2014.  
5 21. World Bank, *Maternal Health Out-of-Pocket Expenditure and Service Readiness in Lao PDR*.  
6 Washington, DC: World Bank. 2013.  
7 22. McKinnon, B., et al., *Distance to emergency obstetric services and early neonatal mortality in*  
8 *Ethiopia*. Trop Med Int Health, 2014. **19**(7): p. 780-90.  
9 23. Ebener, S., et al., *Proposing standardised geographical indicators of physical access to*  
10 *emergency obstetric and newborn care in low-income and middle-income countries*. BMJ Glob  
11 Health, 2019. **4**(Suppl 5): p. e000778.  
12 24. 2017, W.B.G., *Health Financing System Assessment : Papua New Guinea*. World Bank,  
13 Washington, . 2017.  
14 25. Cairns, A. and X. Hou, *Financing the frontline : an analytical review of provincial administrations'*  
15 *rural health expenditure 2006-2012 . Health, Nutrition, and Population (HNP) discussion paper*.  
16 Washington, D.C. : World Bank Group. <https://hubs>. 2015, World Bank Washington DC.  
17 26. Cairns, A.T.H., Xiaohui. , *Financing the frontline : an analytical review of provincial*  
18 *administrations' rural health expenditure 2006-2012 . Health, Nutrition, and Population (HNP)*  
19 *discussion paper*. Washington, D.C. : World Bank Group. , in 2015:  
20 <https://hubs.worldbank.org/docs/ImageBank/Pages/DocProfile.aspx?nodeid=25991656>.  
21  
22  
23 27. Paul, E. and D. Renmans, *Performance-based financing in the health sector in low- and middle-*  
24 *income countries: Is there anything whereof it may be said, see, this is new?* Int J Health Plann  
25 Manage, 2018. **33**(1): p. 51-66.  
26 28. CM, B., et al., *The impact of vouchers on the use and quality of health care in developing*  
27 *countries: a systematic review*. Glob Public Health, 2013. **8**(4): p. 363-88.  
28  
29  
30  
31  
32  
33  
34  
35  
36  
37  
38  
39  
40  
41  
42  
43  
44  
45  
46  
47  
48  
49  
50  
51  
52  
53  
54  
55  
56  
57  
58  
59  
60

Figure 1. The three components of the Donabedian approach to evaluating quality of care

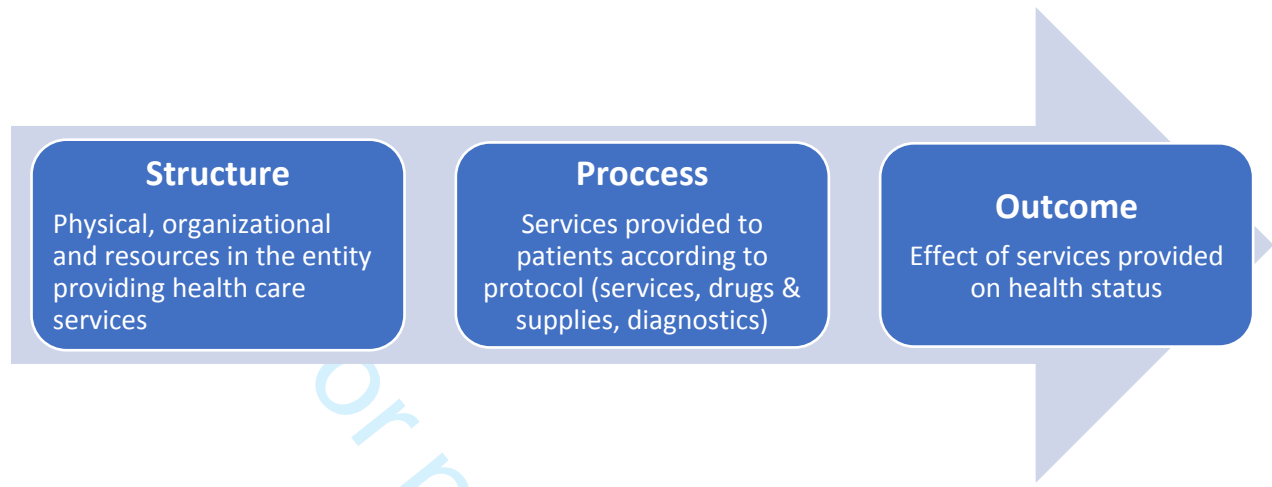

Source: Donabedian (2005)

Figure 2. Map of PNG with Districts Visited (green) and Location of Surveyed Facilities

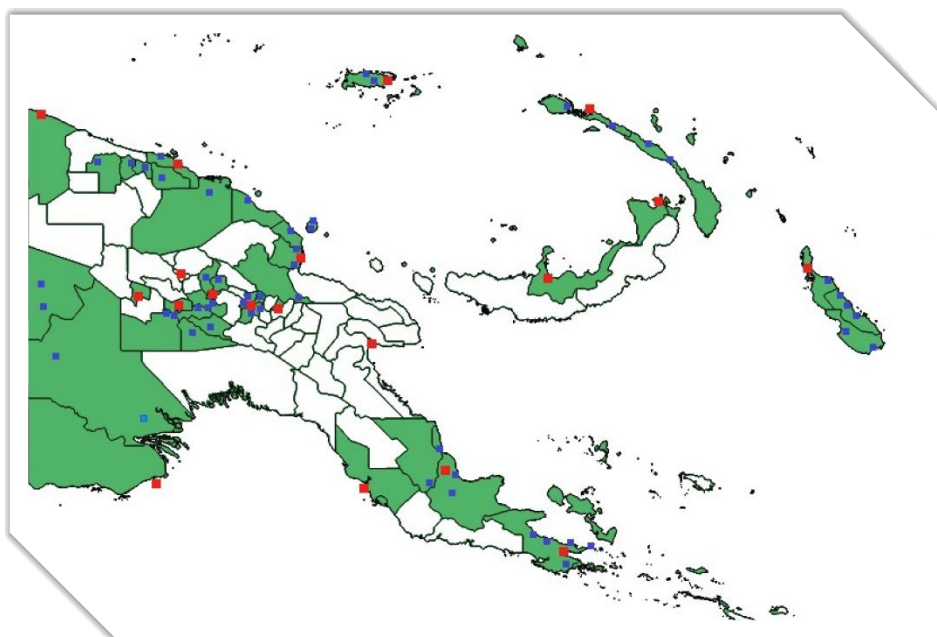

Note: Red squares represent the level 5 to 7 facilities surveyed, while the blue squares represent the level 3 to 4 facilities.



1  
2  
3  
4  
5  
6  
7  
8  
9  
10  
11  
12  
13  
14  
15  
16  
17  
18  
19  
20  
21  
22  
23  
24  
25  
26  
27  
28  
29  
30  
31  
32  
33  
34  
35  
36  
37  
38  
39  
40  
41  
42  
43  
44  
45  
46  
47  
48  
49  
50  
51  
52  
53  
54  
55  
56  
57  
58  
59  
60

For peer review only

Figure 2. Map of PNG with Districts Visited (green) and Location of Surveyed Facilities



Note: Red squares represent the level 5 to 7 facilities surveyed, while the blue squares represent the level 3 to 4 facilities.

# BMJ Open

## Readiness of Health Facilities to Provide Emergency Obstetric Care and Other Related Services in Papua New Guinea

|                                 |                                                                                                                                                                                                                                                                                                                                    |
|---------------------------------|------------------------------------------------------------------------------------------------------------------------------------------------------------------------------------------------------------------------------------------------------------------------------------------------------------------------------------|
| Journal:                        | <i>BMJ Open</i>                                                                                                                                                                                                                                                                                                                    |
| Manuscript ID                   | bmjopen-2021-050150.R1                                                                                                                                                                                                                                                                                                             |
| Article Type:                   | Original research                                                                                                                                                                                                                                                                                                                  |
| Date Submitted by the Author:   | 09-Sep-2021                                                                                                                                                                                                                                                                                                                        |
| Complete List of Authors:       | Hou, Xiaohui ; World Bank Group, Health, Nutrition and Population Global Practice<br>Khan, M. Mahmud ; University of Georgia College of Public Health<br>Pulford, Justin; Liverpool School of Tropical Medicine, ; Papua New Guinea Institute of Medical Research,<br>Saweri, Olga; Papua New Guinea Institute of Medical Research |
| <b>Primary Subject Heading</b>: | Obstetrics and gynaecology                                                                                                                                                                                                                                                                                                         |
| Secondary Subject Heading:      | Global health, Health policy, Health services research, Obstetrics and gynaecology                                                                                                                                                                                                                                                 |
| Keywords:                       | OBSTETRICS, International health services < HEALTH SERVICES ADMINISTRATION & MANAGEMENT, Quality in health care < HEALTH SERVICES ADMINISTRATION & MANAGEMENT, Health policy < HEALTH SERVICES ADMINISTRATION & MANAGEMENT, Maternal medicine < OBSTETRICS                                                                         |
|                                 |                                                                                                                                                                                                                                                                                                                                    |

SCHOLARONE™  
Manuscripts

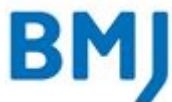

I, the Submitting Author has the right to grant and does grant on behalf of all authors of the Work (as defined in the below author licence), an exclusive licence and/or a non-exclusive licence for contributions from authors who are: i) UK Crown employees; ii) where BMJ has agreed a CC-BY licence shall apply, and/or iii) in accordance with the terms applicable for US Federal Government officers or employees acting as part of their official duties; on a worldwide, perpetual, irrevocable, royalty-free basis to BMJ Publishing Group Ltd ("BMJ") its licensees and where the relevant Journal is co-owned by BMJ to the co-owners of the Journal, to publish the Work in this journal and any other BMJ products and to exploit all rights, as set out in our [licence](#).

The Submitting Author accepts and understands that any supply made under these terms is made by BMJ to the Submitting Author unless you are acting as an employee on behalf of your employer or a postgraduate student of an affiliated institution which is paying any applicable article publishing charge ("APC") for Open Access articles. Where the Submitting Author wishes to make the Work available on an Open Access basis (and intends to pay the relevant APC), the terms of reuse of such Open Access shall be governed by a Creative Commons licence – details of these licences and which [Creative Commons](#) licence will apply to this Work are set out in our licence referred to above.

Other than as permitted in any relevant BMJ Author's Self Archiving Policies, I confirm this Work has not been accepted for publication elsewhere, is not being considered for publication elsewhere and does not duplicate material already published. I confirm all authors consent to publication of this Work and authorise the granting of this licence.

1  
2  
3  
4  
5  
6  
7  
8  
9  
10  
11  
12  
13 **Readiness of Health Facilities to Provide Emergency Obstetric Care and Other Related Services**  
14 **in Papua New Guinea**  
15

For peer review only

1  
2  
3  
4  
5  
6  
7  
8  
9  
10  
11  
12  
13  
14  
15  
16  
17  
18  
19  
20  
21  
22  
23  
24  
25  
26  
27  
28  
29  
30  
31  
32  
33  
34  
35  
36  
37  
38  
39  
40  
41  
42  
43  
44  
45  
46  
47  
48  
49  
50  
51  
52  
53  
54  
55  
56  
57  
58  
59  
60

1  
2  
3 **Readiness of Health Facilities to Provide Emergency Obstetric Care and Other Related Services**  
4 **in Papua New Guinea**  
5  
6

7  
8 **Xiaohui Hou, Ph.D.**

9 Health, Nutrition, and Population Global Practice  
10 World Bank  
11 1818 H. Street. NW, 20433  
12 Washington DC  
13 [xhou@worldbank.org](mailto:xhou@worldbank.org)  
14  
15

16  
17  
18 **M. Mahmud Khan, Ph.D.**

19 Health Policy and Management Department  
20 College of Public Health  
21 University of Georgia  
22 Wright Hall, Health Sciences Campus, 100 Foster Road, Athens, GA 30602  
23 [Mahmud.Khan@uga.edu](mailto:Mahmud.Khan@uga.edu)  
24  
25

26  
27 **Justin Pulford, Ph.D.**

28 Senior Lecturer  
29 Department of International Public Health  
30 Liverpool School of Tropical Medicine  
31 [justin.pulford@lstm.ac.uk](mailto:justin.pulford@lstm.ac.uk)  
32  
33

34  
35  
36 **Olga P. M. Saweri, MSc**

37 Papua New Guinea Institute of Medical Research (PNGIMR)  
38 PO Box 60, Goroka, EHP 441, Papua New Guinea  
39 [olga.saweri@gmail.com](mailto:olga.saweri@gmail.com)  
40  
41

42 Declarations of interest: none

43 Corresponding Author: M. Mahmud Khan, Ph.D., Professor, Health Policy and Management,  
44 College of Public Health, University of Georgia, 100 Foster Road, Wright Hall 116, Athens, GA  
45 30602. [Mahmud.Khan@uga.edu](mailto:Mahmud.Khan@uga.edu)  
46

47  
48 **Key words**  
49

50 Maternal Health, Emergency Obstetric Care, Readiness of health facilities, signal functions for  
51 emergency obstetric care, Papua New Guinea  
52  
53

54 Total word count: 5,017 (excluding references, figures and tables)  
55  
56

### Contributorship statement

**Xiaohui Hou:** Conceptualization, Methodology, Supervision, Project Administration, Resources, Writing-Original Draft, Writing – review & editing

**M. Mahmud Khan:** Conceptualization, Methodology, Supervision, Formal Analysis, Writing-Original Draft, Writing – review & editing

**Justin Pulford:** Conceptualization, Methodology, Data Curation, Data Validation, Writing-Review & Editing.

**Olga P. M. Saweri:** Data Curation, Data Validation, Writing-Review & Editing

### Details of funding source

This work was funded by World Bank's Trust Fund supported by Australia's Department of Foreign Affairs and Trade. World Bank contract number: 7171956, Principal Investigator: M. Mahmud Khan. Date: July 1, 2014.

### Data availability statement

No additional data is available. Researchers interested in 2015 PNG Facility Assessment Survey data can contact the PI of the project, Dr. M. Mahmud Khan, at the email address [Mahmud.Khan@uga.edu](mailto:Mahmud.Khan@uga.edu) with a statement on the reasons for requesting the dataset and types of analyses to be conducted.

## Abstract

### Objective

To measure readiness of health facilities in Papua New Guinea (PNG) to provide obstetric care and other related services.

### Design

Cross-sectional study involving random sample of levels 3 and 4 health facilities and census of all upper level facilities that were operational at the time of survey. Structured questionnaires were used to collect data from health facilities.

### Setting

Health facilities in PNG. Facility administrators and other facility personnel were interviewed during the survey.

### Participants

19 upper-level facilities (levels 5-7) and 60 lower-level (levels 3-4) facilities.

### Outcome measures

Four service-types were used to understand readiness of surveyed health facilities in the provision of maternity care including obstetric care services: (1) facility readiness to provide clinical services; (2) availability of family planning items; (3) availability of maternal and neonatal equipment and materials; and (4) ability to provide emergency obstetric care.

### Results

56% of level 3 and 4 facilities were not able to provide Basic Emergency Obstetric Care (BEmOC). Even among higher level facilities (levels 5, 6 and 7), 16% were not able to perform one or more of the functions required to be considered a BEmOC provider. 11% of level 3 and 4 health facilities were able to provide comprehensive emergency obstetric care (CEmOC) as compared to 83% of higher level facilities.

### Conclusion

Given the high fertility rate in PNG and high maternal mortality ratio (MMR), lack of BEmOC at level 3 and 4 facilities, the first level inpatient service providers, is a major concern. To improve access to EmOC, each of the level 3 and 4 facilities should immediately be upgraded to at least a BEmOC provider. Significant reduction in MMR will require improved access to CEmOC and optimal geographic location approach can identify facilities to be upgraded. Strengthening of family planning services will also help improve access to EmOC.



### Strengths and limitations of this study

- This is the first empirical study that systematically examined availability of maternity care in health facilities in Papua New Guinea (PNG).
- All level 5-7 hospitals and randomly selected functional health centers in PNG were surveyed using structured questionnaires.
- The readiness of facilities in the provision of obstetric care and actual provision of services were assessed by relevant indicators and signal functions.
- Service availability and readiness of facilities could not be linked with community level health outcomes.
- The sampling design selected level of 3 and 4 facilities that were fully functional in each of the surveyed districts implying that the results overestimate the readiness and availability of obstetric care and other related services.

## Introduction

Effective antenatal, neonatal and Emergency Obstetric Care (EmOC) are highly cost-effective interventions vital to avert common adverse pregnancy and/or birth outcomes, which significantly contribute to maternal mortality in poor resource settings.<sup>1-4</sup> Basic Emergency Obstetric Care (BEmOC) alone can avert a significant proportion of maternal deaths and up to 40% of neonatal deaths.<sup>5</sup> A global assessment found that BEmOC facilities are consistently not available in sufficient numbers in countries with high and moderate levels of maternal mortality.<sup>6</sup> Comprehensive Emergency Obstetric Care (CEmOC) availability, which includes the provision of caesarean and blood transfusion services in addition to the key functions included in BEmOC, is also quite poor in many low and middle income countries.<sup>7</sup>

Maternal and child health remains a key priority area in Papua New Guinea (PNG);<sup>8</sup> however, persistently high maternal and neonatal deaths reflect numerous deficiencies. The estimates of Maternal Mortality Ratio (MMR) in PNG vary considerably and one study by Mola and Kirby estimated the MMR for 2009 using facility-based national health information system records and survey data on maternal mortality among unsupervised births from one province. The estimates imply that the average MMR in PNG should be approximately 500 per 100 000 live births.<sup>9 10</sup> The neonatal mortality in PNG is also high, around 28 per 1000 live births.<sup>11</sup> The World Health Organization model ranks PNG 130<sup>th</sup> in the world in terms of MMR.<sup>12</sup> The 2016-2018 PNG Demographic and Health Survey (DHS), using the sisterhood method, found that the MMR was about 205 per 100,000 live births.<sup>13</sup> Even though new DHS estimate represents a significant improvement from the previous estimate of 733 per 100,000 live births in 2006, the maternal mortality in PNG remains about 24 times the MMR in neighboring Australia.<sup>12</sup> The DHS report also indicates that only 17% of pregnancies received a prenatal visit in the first trimester and 49% had four or more prenatal visits over the whole pregnancy. During 2012-2017, about 55% of deliveries in PNG were supervised by trained health workers at health facilities<sup>13</sup> indicating limited access to modern maternal health care services.

To reduce the MMR in any country, it is important to understand the causes of death so that appropriate interventions can be designed and adopted. In PNG, the maternal mortality registry often does not report causes of death. Reviewing the causes of deaths mentioned in the general death registry and in maternal mortality registry, one study in early 1980s found that the main causes were puerperal sepsis, postpartum hemorrhage, medical and surgical complications, prolonged or obstructed labor, ruptured uterus, deaths associated with caesarean section.<sup>14</sup> It is likely that many of these causes of deaths have remained important even today. Clearly, deaths due to the causes indicated above cannot be avoided without timely access to health facilities that are equipped to provide a range of obstetric care services. A recent article mentioned geographically dispersed population, shortage of health care providers, poverty, gender inequality and low level of education as important determinants of maternal deaths.<sup>15</sup> These aspects are, however, directly related to access to care and readiness of health facilities in the provision of maternity care.

1  
2  
3 Lifetime risk of maternal death depends on the probability of maternal death per pregnancy and  
4 the average number of pregnancies per woman over the reproductive age. The 2016-2018 PNG  
5 DHS estimated that total fertility rate (TFR) was about 4.2 per woman, which is slightly lower than  
6 the TFR of 4.4 in 2006. Access to obstetric care and lifetime risk of maternal death can be  
7 improved by lowering the TFR as well.  
8  
9

10 Given the critical importance of timely access to appropriate obstetric care, it is essential to  
11 assess the ability and readiness of health facilities in the provision of emergency obstetric care in  
12 PNG. Due to high TFR of PNG, the demand for maternal health services will continue to increase  
13 rapidly, underscoring the urgent need for improving access to care and strengthening maternal  
14 healthcare service delivery.  
15  
16

17 Despite the high social value of maternal and newborn health care services in PNG, no macro-  
18 level information is available on the ability or readiness of health facilities in the provision of the  
19 services. One recent study assessed the capacity of 21 health facilities in the provision of essential  
20 surgery and anesthesia services.<sup>16</sup> No study on PNG, to date, has examined the readiness and  
21 ability of health facilities at the national level in the provision of obstetric care services. This study  
22 is the first attempt to understand the state of obstetric care availability in PNG.  
23  
24  
25

26 The principal objective of this study is to measure health facility readiness to provide obstetric  
27 care and other related services. Some of the measures reflect not only the readiness of the  
28 facilities in the provision of target services but also the quality of services offered. The nationally  
29 representative health facility survey allows measurement of various indicators of obstetric care  
30 related services. These measures will be useful for policy makers to reform the health care  
31 delivery system to strengthen the provision of obstetric care and general clinical services.  
32  
33  
34

## 35 **Methods**

### 36 *Conceptual Framework*

37  
38 We use the Donabedian's framework to analyze the readiness of obstetric care and other related  
39 services offered through the health facilities in PNG. In general, the Donabedian's approach is  
40 used to evaluate quality of care by analyzing relevant structures, processes and outcomes.<sup>17</sup> The  
41 structure measures affect processes and then processes affect outcomes, as shown in figure 1.  
42 In this study, our focus is on the evaluation of 'structure' and 'process' related measures relevant  
43 for maternity care. The structure and process variables help to better understand the ability of  
44 health facilities in the provision of different service-types. Although, the impact of service  
45 provision cannot be directly measured from the facility survey data, country-level estimates of  
46 maternal mortality and morbidity imply relatively poor outcomes indicating the need for  
47 improving infrastructure and processes associated with obstetric and other related services.  
48  
49  
50  
51

52 To evaluate the ability and readiness to provide general medical care services including obstetric  
53 care, health facilities should have several infrastructural characteristics and resources. Some of  
54 the structural measures are quite general, related to the provision of any clinical service, such as  
55  
56  
57

1  
2  
3 general inpatient services. In addition, specific personnel, supplies and drugs must be available  
4 at the facility to be able to offer the right type of services at the right time based on the clinical  
5 needs of patients. The structural characteristics, although not directly related to maternity care,  
6 are the necessary aspects defining the “readiness” of the facility in the provision of effective  
7 health care services. Readiness, however, does not necessarily imply actual provision of services.  
8 The infrastructural aspects act as the foundation for the provision of services, and relevant health  
9 care resources must be combined with the infrastructure to offer services to patients whenever  
10 needed. The process variables reflect ability to offer different types of obstetric care services and  
11 functions. The process variables for monitoring obstetric care service provision, the signal  
12 functions, are well defined and we will use the facility-level signal functions for understanding  
13 the readiness of facilities in PNG.<sup>18</sup>  
14  
15  
16  
17

### 18 *Study Setting*

19  
20 PNG is remarkably diverse with respect to geography, language, and infrastructure. The country  
21 is divided into 22 provinces across four regions (Highlands, Momase and Southern, and the New  
22 Guinea Islands). Most of the country’s 8 million people live in rural or peri-urban communities  
23 and are faced with significant challenges with regard to equitable access to health, education and  
24 economic opportunities.  
25  
26

27 PNG has a government-funded health system throughout much of the country. It is  
28 supplemented by government-subsidized health services provided by various Christian missions.  
29 Overall, it is estimated that churches provide 47 percent of primary health services, particularly  
30 in rural areas.<sup>19</sup>  
31  
32  
33

34 Health facilities are categorized by the number and cadre of health workers employed and the  
35 services they provide and are detailed in the National Health Services Standard (NHSS) of the  
36 Government of PNG (GoPNG).<sup>20</sup> The levels of health facilities in PNG are numbered 1 through 7,  
37 where levels 1 and 2 provide basic primary health care, specifically outpatient services only. Level  
38 3 health facilities, or health centers, provide outpatient and basic inpatient services for deliveries  
39 and minor ailments requiring observation. Level 4 health facilities, district and rural hospitals,  
40 provide general admissions, limited clinical support services including basic pharmacy and  
41 laboratory services, and depending on the employment of a medical officer, may provide surgical  
42 intervention services. Levels 5 to 7 health facilities provide secondary and tertiary health services  
43 as well as clinical support services, including pharmacy, laboratory, and radiology. The only level  
44 7 health facility, the Port Moresby General Hospital, is the largest and most advanced health care  
45 facility of PNG, employs the largest concentration of health care workers and provides  
46 comprehensive health care services.  
47  
48  
49  
50

### 51 *Survey Design*

52  
53 We conducted a health facility survey of 73 health facilities in PNG in 2015. All operational upper  
54 level health facilities (levels 5 to 7) were selected for the survey. At the time of data collection,  
55  
56  
57

1  
2  
3 PNG had 19 upper-level health facilities and all these 19 facilities were surveyed (although one  
4 of the facilities was not fully operational). The upper-level health facilities in the survey included  
5 the national referral hospital (Port Moresby General Hospital), three regional hospitals, and 15  
6 provincial hospitals. At the national level, since about half of levels 3 and 4 were Church-run, the  
7 survey design intended to sample equal number of publicly-run and Church-run facilities. For  
8 selecting facilities at these two levels, between six (New Guinea Islands) and eight (Southern,  
9 Highlands, and Momase) districts were randomly selected per region. The largest government-  
10 and Church-administered health facilities (one of each type based on outpatient numbers per  
11 annum as reported by the National Health Information System) were purposely selected per  
12 district. This sampling procedure allowed selection of 30 publicly run and 30 church-run facilities  
13 from the selected districts; however, during field visits, not all selected facilities were found to  
14 be operational. Where possible, closed health facilities were replaced by functional ones within  
15 the same district. In some districts there were no functional level 3 or 4 facilities, resulting in less  
16 than 60 facilities surveyed (N=54). Figure 2 shows the location of the health facilities surveyed  
17 for this study. The provinces shaded in green indicate where the survey was carried out. The red  
18 squares represent level 5 to 7 health facilities, while the blue squares represent levels 3 and 4.

### 24 25 *Survey Procedure*

26 The survey comprised of a health facility assessment and costing instrument as well as interviews  
27 with healthcare providers, inpatients, and outpatients. Each instrument is detailed in the survey  
28 report.<sup>21</sup> Briefly, the health facility assessment collected information on various operational  
29 aspects of each health facility, while the costing instrument detailed expenditure on human  
30 resources, equipment, and consumables utilized for the provision of healthcare services. Both  
31 these instruments were completed with health facility managers and administrators. The data  
32 collection was done by a team of 5 trained enumerators, who spent three to five days surveying  
33 each health facility. In total, 73 health facilities were surveyed.

### 34 35 36 37 38 *Public Involvement*

39 Stakeholder consultations were involved in the design and early dissemination of this research.  
40 During the feasibility stage, priority of research questions, choice of outcome measures, and  
41 methods were informed by discussions with stakeholders involving representatives from the  
42 National Department of Health, UN agencies, academics and other development partners in  
43 PNGs. The preliminary findings were also discussed with representatives from the National  
44 Department of Health, Provincial Health Authorities, hospitals and development partners in a  
45 stakeholder consultation workshop held in Port Moresby, PNG.

### 46 47 48 49 50 *Ethics approval*

51 The study was approved by the PNG Institute of Medical Research (IMR) Institutional Review  
52 Board (IRB) and the PNG Medical Research Advisory Committee (MRAC). The following approval  
53 numbers were allocated to the study: IRB No. 1414, 7 August 2014; MRAC No 14.26, 10  
54 November 2014.

### *Outcome measures*

The handbook on monitoring emergency obstetric care<sup>18</sup> identified a set of indicators to measure availability, access and provision of EmOC in a country or a region. Two types of measures were defined -the first type focuses on availability, adequate coverage and utilization of services at national or sub-national levels and the second type measures obstetric care related functions performed by health facilities. The functions identified to define the level of EmOC services offered from a health facility are: (1) Administer parenteral antibiotics, (2) Administer uterotonic drugs, (3) Administer parenteral anticonvulsants, (4) Manually remove the placenta, (5) Remove retained products, (6) Perform assisted vaginal delivery, (7) Perform basic neonatal resuscitation, (8) Perform surgery (e.g., caesarean section), and (9) Perform blood transfusion. When a facility can perform all the functions listed under 1-7, it is considered a Basic EmOC (BEmOC) provider while ability to perform all the nine functions defines the comprehensive EmOC (CEmOC) provider. This study will use these nine measures to categorize health facilities as either a BEmOC or a CEmOC. Note that all these signal functions are defined by the ability to perform specific functions pregnant women need at the time of delivery. Ability to perform the functions does not necessarily imply that the facilities actually provided the services in the recent past.

Since this study is based on facility-level survey data, community or patient related health outcome measures are not directly observable. To compensate for this, we have used additional measures to understand readiness of health facilities in the provision of general inpatient care. Availability of basic medical equipment and supplies and physical condition of the facility (infrastructural variables) may affect willingness of clients to utilize services from the facilities. Another important intervention that improves access to obstetric care is through effective provision of family planning services, which reduce the demand for EmOC. Therefore, in addition to nine EmOC functions listed above, other outcome variables considered in this analysis are: (a) readiness of facilities to provide clinical services; (b) availability of family planning items; and (c) availability of maternity care related equipment and materials. Availability of drugs and supplies is defined as having the item in stock at the time of the survey.

For the availability of equipment, instruments and supplies, several indexes were calculated to indicate degree of availability of the items. The index values range from 0 to 100, 100 implying that all the items used for the construction of the index were available in all the facilities surveyed.

#### *Calculating readiness or availability index*

The analysis has used facility level data to derive the readiness indicators and ability to perform signal functions for each facility in the survey (Stata version 12 was used). The results are presented as descriptive tables (Tables 1-4) to indicate the proportion of facilities having the instruments or able to perform the specific functions.

An equally weighted index was constructed based on the availability of the items included in each of the categories of service delivery. It reflects the percent of all readiness aspects or variables satisfied by the health facilities in a specific category. For example, if a facility reports having an



1  
2  
3 instrument, a value of 1.0 was assigned for the facility for that equipment. The availability index  
4 was constructed to show the percent of listed equipment and items available in each of the  
5 facility categories. For example, if the family planning items availability index is 65 for level 3 and  
6 4 facilities, it means that the facilities on the average had 65 percent of all the family planning  
7 equipment and items considered in the analysis.  
8  
9

## 10 **Results**

### 11 *Facility readiness to provide clinical services*

12  
13  
14 Table 1 reports facility readiness in the provision of services. As shown, 95% of level 5 to 7  
15 facilities were connected to the main electric supply grid but only about a third of level 3 and 4  
16 facilities. However, more than 80% of all facilities connected to the electric supply experienced  
17 blackout at least for some time in the week before the survey. All level 5 to 7 facilities had  
18 functional backup generators, while the percentage of level 3 and 4 facilities with backup  
19 generators was 76% for church-run facilities and 48% for public facilities. Half of the level 3 and  
20 4 facilities with backup generators reported problems in operating the generator in the previous  
21 month.  
22  
23  
24

25  
26 If supply line and water tanks are considered, all level 5 to 7 facilities and 83% of level 3 and level  
27 4 public health facilities and 84% of level 3 and level 4 church health facilities reported having  
28 access to water on the day of the survey. However, less than 10% of level 3 and 4 facilities were  
29 connected with water supply lines. Only 45% of level 3 and 4 public facilities had water  
30 connection to the delivery room (and water availability on the day of the survey) compared to 72%  
31 at church-run facilities.  
32  
33

34 A significant share of health facilities, 62%, 44% and 38% of level 3 and 4 public, level 3 and 4  
35 church, and level 5 and 6 facilities, respectively, experienced water shortages in 2014. The survey  
36 asked facility respondents whether the facility was responsible for maintaining the water supply  
37 system and it was observed that about 45% of public level 3-4 facilities were responsible for  
38 maintaining the water supply system. The proportions were 64% for church-run level 3 and 4  
39 facilities and 68% for level 5 to 7 facilities.  
40  
41  
42

43 Both level 3 and 4 public and church-run health facilities show low readiness score for service  
44 delivery (Table 1). Readiness indexes were 40.3 for level 3 and 4 public sector facilities, 48.6 for  
45 level 3 and 4 church-run facilities, 84.6 for level 5 and 6 facilities, and 100 for the level 7 facility.  
46  
47

### 48 *Availability of Family Planning Items*

49  
50 Table 2 presents the availability of family planning products and supplies in surveyed health  
51 facilities. The availability index of family planning items was 81.6 for level 3 and 4 public sector  
52 health facilities, 84.0 for level 3 and 4 church-run facilities, and 88.9 for level 5 and 6 facilities.  
53 Non-availability of family planning injections in the level 7 facility reduced the overall index of  
54 family planning item availability for the facility to 66.7. Since there is only one facility at level 7,  
55 non-availability of even a single item significantly reduces the overall index.  
56  
57

### *Availability of supplies and equipment for maternity care*

A relatively large proportion of health facilities lacked very basic pregnancy and antenatal care related supplies and equipment as shown in Table 3. The index values for the availability of antenatal and pregnancy care items were 71.4 and 81.6 for level 3 and 4 public- and Church-run facilities, respectively. The index was 81.1 for level 5 and 6 facilities and 100 for level 7 facility. The index of availability of obstetric and post-natal care items were worse in level 3 and level 4 facilities, 64.7 and 76.0 respectively for public and church facilities. The index was 89.9 for level 5 and 6 facilities. Although many facilities stated having forceps when asked about availability of instruments for deliveries, it appears that non-obstetric forceps were reported. Health facilities in PNG, in general, do not use forceps for deliveries.

### *Ability to provide emergency obstetric care services*

Table 4 indicates the percent of facilities able to perform different obstetric functions. As mentioned earlier, WHO has defined nine functions to understand the level of obstetric services provided from the facilities. The survey questionnaire combined first three signal functions (capacity to administer parenteral antibiotics, uterotonic drugs, parenteral anticonvulsants) into one and asked the respondents to report if the facility was able to perform all the three functions, two of the three or one of the three functions. Most level 3-4 facilities (about 80%) reported the ability to perform all these three functions. Two facilities at upper levels (levels 5-7) were not able to perform these three basic obstetric functions. One of the upper level facilities in the sample was not fully functional at the time of the survey. Ability to perform the signal functions 1 to 7 defines the “Basic EmOC” provider and table 4 shows that 38% of Church-run level 3-4 facilities and 52% of government-run level 3-4 facilities were BEmOC providers. Even among higher level facilities (levels 5, 6 and 7), 16% of facilities were not able to perform one or more of the necessary functions required to be considered a BEmOC provider.

If the signal functions for comprehensive emergency obstetric care are considered (all nine signal functions), only about 11% of level 3 and 4 health facilities were found to be CEmOC units. About 15% of level 3 and 4 facilities had the capacity to manage a caesarean section or do blood transfusion. Not all level 5 to 7 facilities were CEmOC providers – four of the 19 upper level facilities were not able to perform at least one of the nine signal functions.

## **Discussion**

The overall health facility infrastructural condition in PNG is quite poor. Most facilities reported the need for major building repairs and emphasized the lack of adequate toilets, stable electrical supply, and consistent water supply. Many level 3 and 4 health facilities required better connectivity to electricity and clean water supply. One significant concern is the number of health facilities that did not have running water in the facility’s delivery room. The quantity and quality of different types of clinical services provided crucially depends on the facility’s readiness to offer services in general. Overall, level 3 and 4 facilities, both public and Church-run, scored low on the



1  
2  
3 readiness index, implying that these facilities were not very reliable providers of services and  
4 patient-confidence in these facilities are likely to be low. The survey also revealed the need for  
5 improving the supply of basic medical items at level 3 and 4 public health facilities. Level 3 and 4  
6 public facilities show lower availability of different medical items compared to those in Church-  
7 run facilities.  
8  
9

10 Comparison of health facility readiness across countries is often tricky because of differences in  
11 the level and comprehensiveness of facilities in different countries of the world. A World Bank  
12 report<sup>22</sup> indicates that 98 percent of public hospitals in Indonesia had electricity; in Laos, the  
13 index of basic amenities was reported as 64 percent<sup>23</sup> compared to 58 percent for PNG (weighted  
14 mean of the values in table 1).  
15  
16

17 Access to family planning services is still limited in PNG. The results from the survey are consistent  
18 with the most recent findings from the PNG DHS. One quarter of currently married women (26%)  
19 have an unmet need for family planning, and only 59% of currently married women are satisfied  
20 with family planning services. Among those who have received family planning, about 9 in 10  
21 users obtained their modern family planning supplies from a public (government) source.  
22 Therefore, there is an urgent need to strengthen the government health facilities, especially at  
23 lower levels, in the provision of family planning items and services to reduce maternal mortality  
24 and to improve access to obstetric care services. Several studies found strong positive effect of  
25 increased use of family planning on maternal and child mortality.<sup>24-26</sup>  
26  
27  
28  
29  
30

31 While 79% of level 5 to 7 facilities were found to be CEmOC providers, the fact that about a fifth  
32 were not able to provide comprehensive emergency obstetric care is a major concern, given that  
33 these are the higher level referral hospitals in PNG. Consistent with the findings of this study,  
34 another study using a much smaller sample of facilities, concluded that the “Capacity for essential  
35 surgery and anaesthesia services is severely limited in PNG due to shortfalls in physical  
36 infrastructure, human resources, and basic equipment and supplies.”<sup>16</sup>  
37  
38

39 The number of level 3 and 4 facilities surveyed for this study was high enough to provide national  
40 level estimates on obstetric care availability. Using the proportions of CEmOC facilities at  
41 different levels and the total number of facilities in the country at these levels, we have derived  
42 the number of facilities providing comprehensive obstetric care in PNG at the time of the survey.  
43 The number turns out to be only 50 for the country. Even if we arbitrarily assume balanced  
44 geographic distribution of these facilities, an emergency obstetric case will have to travel 53 km  
45 each way, on average, to reach a CEmOC facility. The distance to the nearest CEmOC facility is so  
46 large that for many emergency cases this is virtually synonymous of not having access to CEmOC.  
47 To reduce maternal mortality and morbidity significantly, it is essential to lower the average  
48 distance to the nearest CEmOC facility<sup>27</sup> implying that PNG will have to upgrade a significant  
49 number of levels 3, 4 and 5 facilities. Using geographic information systems and geographical  
50 modelling tools to optimize the location of CEmOC facilities, PNG can identify specific existing  
51 facilities to be upgraded.<sup>28</sup>  
52  
53  
54  
55  
56  
57  
58  
59  
60

1  
2  
3 All facilities at level 3 or above should be able to provide basic EmOC. To improve access to  
4 emergency obstetric care, most level 3 and 4 facilities should be considered for immediate  
5 upgrading to BEmOC provider or better. The survey of facilities indicated that about 45 percent  
6 of levels 3 and 4 facilities were not ready to provide BEmOC. Despite this low readiness, equipping  
7 about 15 to 20% of these facilities to perform signal functions 5 and 6 can improve BEmOC  
8 availability from 55% of the facilities to about 80%. Although maternal and child health is a  
9 priority area, PNG has not allocated enough resources to achieve improved access to maternity  
10 and neonatal services. PNG spends more than 4.3% of its GDP on health (about \$109 per capita  
11 in PPP dollars). Total health expenditure is not low compared to other countries with similar level  
12 of per capita income.<sup>29</sup> However, a significant part of health resources, including human  
13 resources, particularly doctors, are concentrated in a few major hospitals. Therefore, the  
14 resource allocation at the lower level health facilities (level 3 and level 4 facilities) are not  
15 sufficient. Reallocation of public sector resources to lower level health facilities are needed to  
16 expand access to obstetric care and other preventive services.

17  
18  
19  
20  
21  
22 To improve availability and access to quality maternity services in PNG, especially in remote rural  
23 areas, a program of training and upskilling of Community Health Workers was adopted.<sup>30</sup>  
24 Although the upskilling has increased utilization of basic maternity services, significant reductions  
25 in maternal mortality will require access to hospital-based obstetric care. Government of PNG  
26 may consider allocating funds to facilities, both public and church facilities, based on quantities  
27 of priority health services delivered rather than on number and mix of human resources and  
28 other administrative needs.<sup>31</sup> While the effectiveness of such performance based financing  
29 depend on how the schemes are implemented, evidence in low and middle income countries  
30 shows that the performance can be improved through financial incentives.<sup>32</sup> From the demand  
31 side, past research has found that providing pregnant women with health vouchers to ensure  
32 financial protection for accessing medical care has increased utilization of health services.<sup>33</sup> The  
33 payments received through the vouchers will also encourage facilities to become more sensitive  
34 to the needs of pregnant women and would have incentives to invest to become fully functional  
35 EmOC providers. An initiative in two provinces in PNG that provided incentive packages to  
36 pregnant women increased facility-based supervised birth rates by 80%<sup>34</sup> indicating that  
37 enhancing facility readiness combined with incentivizing pregnant women to utilize health  
38 facilities will be very effective in improving maternal and neonatal health.

### 39 ***Study Limitations***

40  
41  
42  
43  
44  
45  
46  
47 Several limitations of the study should be mentioned here. First, it is not possible to indicate  
48 overall geographic access to primary health care services in PNG using the survey data because  
49 the study did not collect information from level 1 and 2 health facilities. However, these facilities  
50 do not provide obstetric care services although some basic services like family planning and  
51 antenatal care can potentially be organized at these levels. Second, the survey, strictly speaking,  
52 is not a representative survey of level 3 and 4 facilities. The survey design selected high-demand  
53 fully functional level 3 and 4 facilities in target districts and the definition of fully functional led  
54  
55  
56  
57

1  
2  
3 to the choice of facilities that showed relatively high level of utilization. Therefore, if anything,  
4 the results are likely to be significant overestimations of degree of readiness of the facilities in  
5 the provision of obstetric care and other related services in PNG. Even with this favorable  
6 selection of facilities, the percent of facilities able to perform BEmOC and CEmOC was quite low  
7 at levels 3 and 4 implying that the availability of obstetric care services could be significantly  
8 worse than what has been reported in this study. Third, the study did not try to connect the  
9 service availability and readiness with health outcomes of the population at the subnational level.  
10 In PNG, even the national level estimates of mortality and morbidity are considered unreliable  
11 and subnational level estimates would suffer from even higher degree of error in estimation. In  
12 any case, facility level information clearly indicates that many of the functional facilities are not  
13 ready to provide obstetric health services and a significant proportion of facilities lack medical  
14 equipment, instruments and supplies for the provision of quality maternity and neonatal services.  
15  
16  
17  
18

### 19 **Conclusions**

20  
21 Inability of a health facility, irrespective of whether it is a primary, secondary and tertiary care  
22 facility, to provide obstetric care and other related services is an important concern for any health  
23 care system. It is especially true for a country like PNG where maternal and infant mortalities are  
24 high alongside a high fertility rate. Better access and utilization of family planning services can  
25 help reduce the demand for EmOC, lower maternal and neonatal mortality/morbidity and  
26 improve access to maternity services. Lowering the need for maternity services through  
27 interventions like family planning, however, is unlikely to improve access to maternity care  
28 significantly in the short-run. Supply-side interventions are necessary to ensure that the services  
29 are available in strategically located health facilities. Improving facility infrastructure, equipping  
30 the facilities with essential medical equipment and supplies and ensuring the presence of trained  
31 personnel in health facilities are needed to make the facilities BEmOC or CEmOC providers. Since  
32 the number of facilities in PNG offering EmOC is quite low compared to the needs, all level 3 and  
33 4 facilities should be upgraded to at least the BEmOC level. Survey-based estimates suggest that  
34 only 50 facilities in PNG can be considered CEmOC providers and this number is inadequate to  
35 ensure equitable access to emergency obstetric cases. Increasing the number of CEmOC  
36 providers is urgently needed.  
37  
38  
39  
40  
41  
42  
43  
44  
45  
46  
47  
48  
49  
50  
51  
52  
53  
54  
55  
56  
57  
58  
59  
60

1  
2  
3  
4  
5  
6  
7  
8  
9  
10  
11  
12  
13  
14  
15  
16  
17  
18  
19  
20  
21  
22  
23  
24  
25  
26  
27  
28  
29  
30  
31  
32  
33  
34  
35  
36  
37  
38  
39  
40  
41  
42  
43  
44  
45  
46  
47  
48  
49  
50  
51  
52  
53  
54  
55  
56  
57  
58  
59  
60

**Figure caption**

Figure 1. Three components of Donabedian approach of evaluating quality of care

Figure 2. Map of PNG with Districts Visited (green) and Location of Surveyed Facilities

For peer review only

## References:

1. Islam, M.T., et al., *Improvement of coverage and utilization of EmOC services in southwestern Bangladesh*. Int J Gynaecol Obstet, 2005. **91**(3): p. 298-305; discussion 283-4.
2. Turab, A., et al., *Improved accessibility of emergency obstetrics and newborn care (EmONC) services for maternal and newborn health: a community based project*. BMC Pregnancy Childbirth, 2013. **13**: p. 136.
3. Chavula, K., et al., *Readiness of hospitals to provide Kangaroo Mother Care (KMC) and documentation of KMC service delivery: Analysis of Malawi 2014 Emergency Obstetric and Newborn Care (EmONC) survey data*. J Glob Health, 2017. **7**(2): p. 020802.
4. Ameh, C.A., et al., *The effectiveness of training in emergency obstetric care: a systematic literature review*. Health Policy Plan, 2019. **34**(4): p. 257-270.
5. Lee, A.C., et al., *Care during labor and birth for the prevention of intrapartum-related neonatal deaths: a systematic review and Delphi estimation of mortality effect*. BMC Public Health, 2011. **11 Suppl 3**(Suppl 3): p. S10.
6. Paxton, A., et al., *Global patterns in availability of emergency obstetric care*. Int J Gynaecol Obstet, 2006. **93**(3): p. 300-7.
7. Banke-Thomas, A., et al., *Assessing emergency obstetric care provision in low- and middle-income countries: a systematic review of the application of global guidelines*. Glob Health Action, 2016. **9**: p. 31880.
8. Government of Papua New Guinea, *National Health Plan 2011–2020, Volume 1: Policies and Strategies*. June 2010,.
9. Mola, G. and B. Kirby, *Discrepancies between national maternal mortality data and international estimates: The experience of Papua New Guinea*. Reproductive health matters, 2013. **21**: p. 191-202.
10. Robbers, G., et al., *Maternal and newborn health indicators in Papua New Guinea – 2008–2018*. Sexual and Reproductive Health Matters, 2019. **27**(1): p. 52-68.
11. PNG National Department of Health, *Health Information Systems*. 2019.
12. WHO, UNICEF, UNFPA, World Bank Group, and the United Nations Population Division. *Trends in Maternal Mortality: 2000 to 2017*. Geneva, World Health Organization, 2019.
13. National Statistical Office (NSO) [Papua New Guinea] and ICF, *Papua New Guinea Demographic and Health Survey 2016-18. Port Moresby, Papua New Guinea, and Rockville, Maryland, USA: NSO and ICF*. 2019.
14. Mola, G., I Aitken, *Maternal mortality in Papua New Guinea 1976-1983*. PNG Medical Journal, 1984. **27**(2): p. 65-71.
15. Dennis, A.T., *Reducing Maternal Mortality in Papua New Guinea: Contextualizing Access to Safe Surgery and Anesthesia*. Anesthesia & Analgesia: January 2018. **126**(1): p 252-259. doi: 10.1213/ANE.0000000000002550
16. Martin, J., Goa Tau, Meena Nathan Cherian, Jennifer Vergel de Dios, David Mills, Jane Fitzpatrick, William Adu-Krow & Davy Cheng, *Survey of the capacity for essential surgery and anaesthesia services in Papua New Guinea*. BMJ Open 2015;5: e009841. doi:10.1136/bmjopen-2015-009841.

17. Donabedian, A., *Evaluating the Quality of Medical Care*. The Milbank Quarterly, 2005 83(4): p. 691-729 (reprint from 44(3): 166-203, 1966).
18. WHO, UNFPA, UNCEF, & AMDD, *Monitoring emergency obstetric care: a handbook. 2009*, Geneva: World Health Organization.
19. NDOH, *Christian Health Services Technical Assistance Mission Report*. 2013, National Department of Health: Port Moresby, Papua New Guinea.
20. Government of PNG (GoPNG), *National Health Service Standards for Papua New Guinea 2011-2020*, Volume 1, June 2011.
21. Khan, M. Mahmud, Xiaohui Hou, Olga PM Saweri, Ibrahim Demir, Rifat Haider, Shakil Ahmed and Justin Pulford, *Service Delivery by Health Facilities in Papua New Guinea: Report based on a countrywide health facility survey*, Washington DC: The World Bank Group. December 2017.
22. World Bank, *Universal Maternal Health Coverage? Assessing the Readiness of Public Health Facilities to Provide Maternal Health Care in Indonesia*. Washington, DC: World Bank. 2014.
23. World Bank, *Maternal Health Out-of-Pocket Expenditure and Service Readiness in Lao PDR*. Washington, DC: World Bank. 2013.
24. Chola L, McGee S, Tugendhaft A, Buchmann E, Hofman K. *Scaling Up Family Planning to Reduce Maternal and Child Mortality: The Potential Costs and Benefits of Modern Contraceptive Use in South Africa*. PLoS ONE 2015, 10(6): e0130077. doi:10.1371/journal.pone.0130077
25. Budi Utomo, B. , Purwa Kurnia Suchaya, Nohan Arum Romadlona, Annette Sachs Robertson, Riznawaty Imma Aryanty and Robert Joseph Magnani, *The impact of family planning on maternal mortality in Indonesia: what future contribution can be expected?* Population Health Metrics (2021) 19:2, <https://doi.org/10.1186/s12963-020-00245-w>
26. Winikoff, B. & Maureen Sullivan. *Assessing the Role of Family Planning in Reducing Maternal Mortality*, Studies in Family Planning , May - Jun., 1987, 18(3), p. 128-143
27. McKinnon, B., et al., *Distance to emergency obstetric services and early neonatal mortality in Ethiopia*. Trop Med Int Health, 2014. **19**(7): p. 780-90.
28. Ebener, S., et al., *Proposing standardised geographical indicators of physical access to emergency obstetric and newborn care in low-income and middle-income countries*. BMJ Glob Health, 2019. **4**(Suppl 5): p. e000778.
29. World Bank, *Health Financing System Assessment : Papua New Guinea*. World Bank, Washington, . 2017.
30. Mola, G., *Upskilling experienced female CHWs currently working in maternity care in rural health facilities in maternity care skills*, unpublished memo, December 2020.
31. Cairns, A. and Xiaohui Hou , *Financing the frontline : an analytical review of provincial administrations' rural health expenditure 2006-2012 . Health, Nutrition, and Population (HNP) discussion paper*. Washington, D.C. : World Bank Group. , in 2015: <https://hubs.worldbank.org/docs/ImageBank/Pages/DocProfile.aspx?nodeid=25991656>.
32. Paul, E. and D. Renmans, *Performance-based financing in the health sector in low- and middle-income countries: Is there anything whereof it may be said, see, this is new?* Int J Health Plann Manage, 2018. **33**(1): p. 51-66.

- 1  
2  
3 33. CM, B., et al., *The impact of vouchers on the use and quality of health care in developing*  
4 *countries: a systematic review*. Glob Public Health, 2013. **8**(4): p. 363-88.  
5  
6 34. Mola, G., A pioneering approach to birthing, PNG Attitude, December 2019.  
7 <https://www.pngattitude.com/2019/12/a-pioneering-approach-to-birthing.html>  
8  
9  
10  
11  
12  
13  
14  
15  
16  
17  
18  
19  
20  
21  
22  
23  
24  
25  
26  
27  
28  
29  
30  
31  
32  
33  
34  
35  
36  
37  
38  
39  
40  
41  
42  
43  
44  
45  
46  
47  
48  
49  
50  
51  
52  
53  
54  
55  
56  
57  
58  
59  
60

For peer review only



**Table 1. Readiness Index for provision of general clinical services by Facility Level in Papua New Guinea**

| Readiness indicators                                                      | Level 3 and 4 |     |             |     | Level 5 and 6 |      | Level 7    |      |
|---------------------------------------------------------------------------|---------------|-----|-------------|-----|---------------|------|------------|------|
|                                                                           | Public        | %   | Church      | %   | N             | %    | N          | %    |
| Electricity connected to supply grid                                      | 10            | 34% | 7           | 28% | 17            | 94%  | 1          | 100% |
| Backup generator                                                          | 14            | 48% | 19          | 76% | 18            | 100% | 1          | 100% |
| Electricity availability (supply or generator)                            | 20            | 69% | 21          | 84% | 18            | 100% | 1          | 100% |
| Blackout last week                                                        | 8             | 28% | 6           | 24% | 15            | 83%  | 0          | 0    |
| Problem last month running generator due to fuel shortage                 | 8             | 28% | 10          | 40% | 3             | 17%  | 0          | 0    |
| Water from main line                                                      | 2             | 7%  | 3           | 12% | 15            | 83%  | 1          | 100% |
| Water shortage last year                                                  | 18            | 62% | 11          | 44% | 7             | 39%  | 0          | 0    |
| Water available for use by health care providers                          | 24            | 83% | 21          | 84% | 18            | 100% | 1          | 100% |
| Water available in delivery room                                          | 13            | 45% | 18          | 72% | 18            | 100% | 1          | 100% |
| Facility does direct blood transfusion                                    | 3             | 10% | 3           | 12% | 16            | 89%  | 1          | 100% |
| Blood transfusions done last month                                        | 3             | 10% | 3           | 12% | 18            | 100% | 1          | 100% |
| Facility has designated space for clinicians to provide service           | 20            | 69% | 20          | 80% | 18            | 100% | 1          | 100% |
| Facility has on-call room or space for health care providers to take rest | 3             | 10% | 11          | 44% | 10            | 56%  | 1          | 100% |
| Facility has telephone or shortwave radio                                 | 14            | 48% | 14          | 56% | 15            | 83%  | 1          | 100% |
| Facility has ambulance                                                    | 26            | 90% | 24          | 96% | 17            | 94%  | 1          | 100% |
| Ambulance out of service last year                                        | 11            | 38% | 10          | 40% | 6             | 33%  | 0          | 0    |
| Facility has other vehicles                                               | 8             | 28% | 5           | 20% | 18            | 100% | 1          | 100% |
| Facility has operation theatre                                            | 8             | 28% | 9           | 36% | 18            | 100% | 1          | 100% |
| <b>Index of readiness</b>                                                 | <b>40.3</b>   |     | <b>48.5</b> |     | <b>84.6</b>   |      | <b>100</b> |      |

Source: 2015 Survey of health facilities in PNG (survey conducted by this study)



**Table 2. Availability of Family Planning Items by Facility Level in Papua New Guinea**

| Family planning (FP) items | Level 3 and 4 facilities |             |             |             | Level 5 and 6 facilities |                    | Level 7 facilities |              |
|----------------------------|--------------------------|-------------|-------------|-------------|--------------------------|--------------------|--------------------|--------------|
|                            | Public                   | % of Public | Church      | % of Church | Public                   | % of Level 5 and 6 | Public             | % of Level 7 |
| Oral pills                 | 26                       | 90%         | 21          | 84%         | 17                       | 94%                | 1                  | 100%         |
| FP injections              | 22                       | 76%         | 22          | 88%         | 15                       | 83%                | 0                  | 0%           |
| Condoms                    | 23                       | 79%         | 20          | 80%         | 16                       | 89%                | 1                  | 100%         |
| <b>Index of FP items</b>   | <b>81.6</b>              |             | <b>84.0</b> |             | <b>88.9</b>              |                    | <b>66.7</b>        |              |

Source: 2015 Survey of health facilities in PNG (survey conducted by this study)

For peer review only

**Table 3. Availability of Supplies and Equipment for Maternity Care in PNG by Health Facility Level**

| Antenatal, pregnancy, obstetric and neonatal care related equipment and supplies | Level 3 and 4 |             |              |             | Level 5 and 6 |      | Level 7       |      |
|----------------------------------------------------------------------------------|---------------|-------------|--------------|-------------|---------------|------|---------------|------|
|                                                                                  | Public        | % of Public | Church       | % of Church | Public        | %    | Public        | %    |
| Foetal stethoscope (or monitor)                                                  | 27            | 93%         | 25           | 100%        | 14            | 78%  | 1             | 100% |
| Stethoscope and blood pressure cuff                                              | 22            | 76%         | 25           | 100%        | 16            | 89%  | 1             | 100% |
| Tape measure                                                                     | 23            | 79%         | 22           | 88%         | 16            | 89%  | 1             | 100% |
| Scale                                                                            | 28            | 97%         | 25           | 100%        | 16            | 89%  | 1             | 100% |
| Ultrasound machine (and gel)                                                     | 28            | 97%         | 25           | 100%        | 17            | 94%  | 1             | 100% |
| Facility has at least two skilled birth attendants covering 24 hours a day       | 21            | 72%         | 19           | 76%         | 18            | 100% | 1             | 100% |
| Delivery kit (instruments, supplies)                                             | 25            | 86%         | 25           | 100%        | 18            | 100% | 1             | 100% |
| Stethoscope                                                                      | 10            | 34%         | 11           | 44%         | 15            | 83%  | 1             | 100% |
| Partograph                                                                       | 11            | 38%         | 13           | 52%         | 14            | 78%  | 1             | 100% |
| Pelvic procedure instruments such as speculum                                    | 18            | 62%         | 22           | 88%         | 16            | 89%  | 1             | 100% |
| Delivery light                                                                   | 24            | 83%         | 24           | 96%         | 18            | 100% | 1             | 100% |
| Sterilizer                                                                       | 15            | 52%         | 16           | 64%         | 13            | 72%  | 1             | 100% |
| Vacuum extractor                                                                 | 14            | 48%         | 21           | 84%         | 18            | 100% | 1             | 100% |
| Forceps                                                                          | 25            | 86%         | 25           | 100%        | 18            | 100% | 1             | 100% |
| Manual vacuum aspirator/suction bulb                                             | 27            | 93%         | 25           | 100%        | 17            | 94%  | 1             | 100% |
| Resuscitation bag, newborn                                                       | 4             | 14%         | 4            | 16%         | 15            | 83%  | 1             | 100% |
| Eye drops or ointment for newborn                                                | 27            | 93%         | 25           | 100%        | 18            | 100% | 1             | 100% |
| Needles and syringes                                                             | 28            | 97%         | 25           | 100%        | 18            | 100% | 1             | 100% |
| Sterile C-section instrument kits                                                | 28            | 97%         | 25           | 100%        | 18            | 100% | 1             | 100% |
| Cord supplies for newborn: clamps, ties, scissors                                | 2             | 7%          | 5            | 20%         | 12            | 67%  | 1             | 100% |
| IV sets, including sterilized needle and tube                                    | 27            | 93%         | 25           | 100%        | 17            | 94%  | 1             | 100% |
| IV fluids, including normal saline and ringer lactate                            | 29            | 100%        | 25           | 100%        | 18            | 100% | 1             | 100% |
| <b>Index: availability of antenatal and pregnancy care items</b>                 | <b>71.41</b>  |             | <b>81.60</b> |             | <b>81.11</b>  |      | <b>100.00</b> |      |
| <b>Index: availability of obstetric and neonatal care items</b>                  | <b>64.66</b>  |             | <b>76.00</b> |             | <b>89.93</b>  |      | <b>100.00</b> |      |

Source: 2015 Survey of health facilities in PNG (survey conducted by this study)

**Table 4. Percentage of Health Facilities Able to Perform Signal Functions with Categorization of Facilities into Basic Emergency Obstetric Care and Comprehensive Emergency Obstetric Care Providers**

| Signal functions for obstetric and neonatal care                                                                        | Ability to perform    | Level 3 and 4 public % (n) | Level 3 and 4 church % (n) | Level 5 to 7 % (n) | Total % (n) |
|-------------------------------------------------------------------------------------------------------------------------|-----------------------|----------------------------|----------------------------|--------------------|-------------|
| Signal functions 1-3: Have capacity to administer parenteral antibiotics, uterotonic drugs, parenteral anticonvulsants? | Yes, all three        | 76% (22)                   | 80% (20)                   | 89% (17)           | 81% (59)    |
|                                                                                                                         | Yes, two of the three | 10% (3)                    | 16% (4)                    | 5% (1)             | 11% (8)     |
|                                                                                                                         | Yes, one of the three | 3% (1)                     | 4% (1)                     | 0% (0)             | 3% (2)      |
| Signal function 4: Have the ability for manual removal of placenta?                                                     | Yes                   | 72% (21)                   | 88% (22)                   | 95% (18)           | 84% (61)    |
| Signal function 5: Have ability to remove retained products?                                                            | Yes                   | 59% (17)                   | 80% (20)                   | 95% (18)           | 75% (55)    |
| Signal function 6: Have the capacity to perform assisted vaginal delivery?                                              | Yes                   | 59% (17)                   | 72% (18)                   | 89% (17)           | 71% (52)    |
| Signal function 7: Have ability to Perform basic neonatal resuscitation                                                 | Yes                   | 72% (21)                   | 96% (24)                   | 95% (18)           | 86% (63)    |
| Signal function 8: Have ability to perform surgery and manage caesarean section                                         | Yes                   | 14% (4)                    | 16% (4)                    | 95% (18)           | 36% (26)    |
| Signal function 9: Have capacity to do safe blood transfusion                                                           | Yes                   | 14% (4)                    | 20% (5)                    | 89% (17)           | 36% (26)    |
| Ability to perform first seven signal functions                                                                         | Basic EmOC            | 38% (11)                   | 52% (13)                   | 84% (16)           | 55% (40)    |
| Ability to perform all nine signal functions                                                                            | Comprehensive EmOC    | 10% (3)                    | 12% (3)                    | 79% (15)           | 29% (21)    |

Source: 2015 Survey of health facilities in PNG (survey conducted by this study)

Figure 1. Three components of Donabedian approach of evaluating quality of care

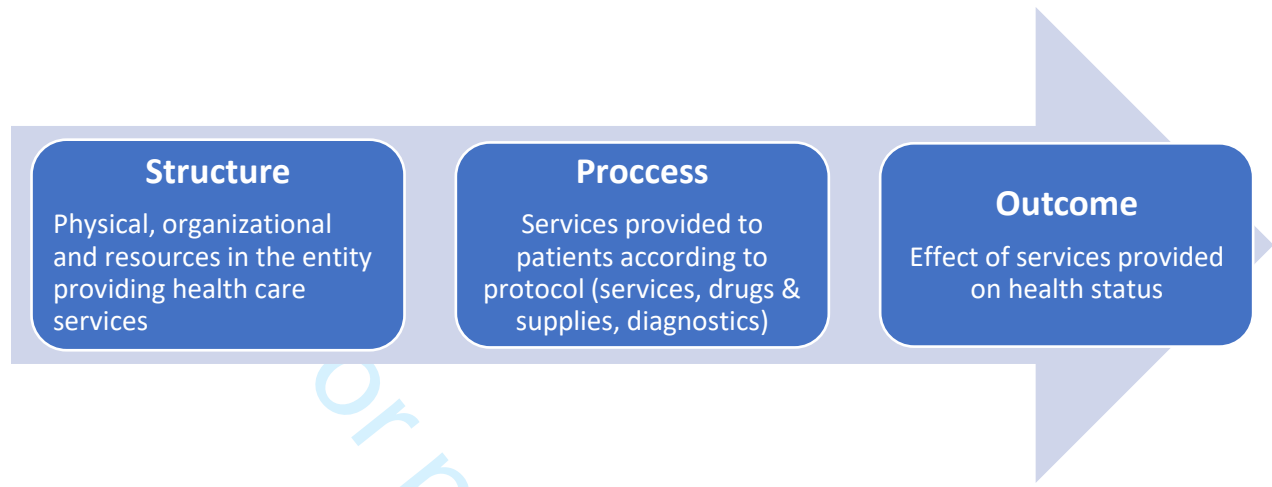

Source: Donabedian (2005)

Figure 2. Map of PNG with Districts Visited (green) and Location of Surveyed Facilities

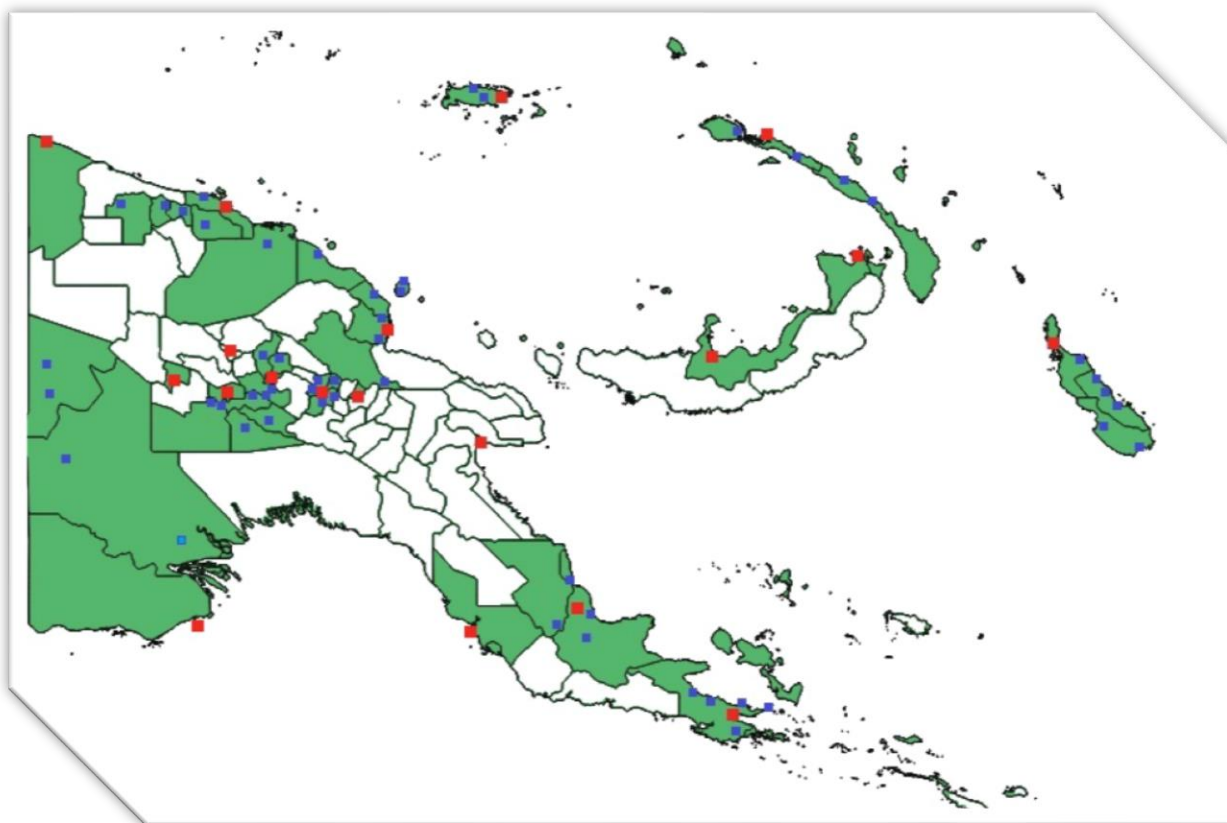

Note: Red squares represent the level 5 to 7 facilities while the blue squares represent the level 3 to 4 facilities surveyed.

# BMJ Open

## Readiness of Health Facilities to Provide Emergency Obstetric Care in Papua New Guinea – Evidence from a Cross-Sectional Survey

|                                 |                                                                                                                                                                                                                                                                                                                                    |
|---------------------------------|------------------------------------------------------------------------------------------------------------------------------------------------------------------------------------------------------------------------------------------------------------------------------------------------------------------------------------|
| Journal:                        | <i>BMJ Open</i>                                                                                                                                                                                                                                                                                                                    |
| Manuscript ID                   | bmjopen-2021-050150.R2                                                                                                                                                                                                                                                                                                             |
| Article Type:                   | Original research                                                                                                                                                                                                                                                                                                                  |
| Date Submitted by the Author:   | 21-Dec-2021                                                                                                                                                                                                                                                                                                                        |
| Complete List of Authors:       | Hou, Xiaohui ; World Bank Group, Health, Nutrition and Population Global Practice<br>Khan, M. Mahmud ; University of Georgia College of Public Health<br>Pulford, Justin; Liverpool School of Tropical Medicine, ; Papua New Guinea Institute of Medical Research,<br>Saweri, Olga; Papua New Guinea Institute of Medical Research |
| <b>Primary Subject Heading</b>: | Obstetrics and gynaecology                                                                                                                                                                                                                                                                                                         |
| Secondary Subject Heading:      | Global health, Health policy, Health services research, Obstetrics and gynaecology                                                                                                                                                                                                                                                 |
| Keywords:                       | OBSTETRICS, International health services < HEALTH SERVICES ADMINISTRATION & MANAGEMENT, Quality in health care < HEALTH SERVICES ADMINISTRATION & MANAGEMENT, Health policy < HEALTH SERVICES ADMINISTRATION & MANAGEMENT, Maternal medicine < OBSTETRICS                                                                         |
|                                 |                                                                                                                                                                                                                                                                                                                                    |

SCHOLARONE™  
Manuscripts



I, the Submitting Author has the right to grant and does grant on behalf of all authors of the Work (as defined in the below author licence), an exclusive licence and/or a non-exclusive licence for contributions from authors who are: i) UK Crown employees; ii) where BMJ has agreed a CC-BY licence shall apply, and/or iii) in accordance with the terms applicable for US Federal Government officers or employees acting as part of their official duties; on a worldwide, perpetual, irrevocable, royalty-free basis to BMJ Publishing Group Ltd ("BMJ") its licensees and where the relevant Journal is co-owned by BMJ to the co-owners of the Journal, to publish the Work in this journal and any other BMJ products and to exploit all rights, as set out in our [licence](#).

The Submitting Author accepts and understands that any supply made under these terms is made by BMJ to the Submitting Author unless you are acting as an employee on behalf of your employer or a postgraduate student of an affiliated institution which is paying any applicable article publishing charge ("APC") for Open Access articles. Where the Submitting Author wishes to make the Work available on an Open Access basis (and intends to pay the relevant APC), the terms of reuse of such Open Access shall be governed by a Creative Commons licence – details of these licences and which [Creative Commons](#) licence will apply to this Work are set out in our licence referred to above.

Other than as permitted in any relevant BMJ Author's Self Archiving Policies, I confirm this Work has not been accepted for publication elsewhere, is not being considered for publication elsewhere and does not duplicate material already published. I confirm all authors consent to publication of this Work and authorise the granting of this licence.

1  
2  
3  
4  
5  
6  
7  
8  
9  
10  
11  
12  
13  
14  
15  
16  
17  
18  
19  
20  
21  
22  
23  
24  
25  
26  
27  
28  
29  
30  
31  
32  
33  
34  
35  
36  
37  
38  
39  
40  
41  
42  
43  
44  
45  
46  
47  
48  
49  
50  
51  
52  
53  
54  
55  
56  
57  
58  
59  
60

1  
2  
3  
4  
5  
6  
7  
8  
9

**Readiness of Health Facilities to Provide Emergency Obstetric Care in Papua New Guinea – Evidence from a Cross-Sectional Survey**

For peer review only



1  
2  
3 **1 Readiness of Health Facilities to Provide Emergency Obstetric Care in Papua New Guinea -**  
4 **2 Evidence from a Cross-Sectional Survey**

6  
7  
8 **4 Xiaohui Hou, Ph.D.**

9 Health, Nutrition, and Population Global Practice  
10 World Bank  
11 1818 H. Street. NW, 20433  
12 Washington DC  
13 [14 xhou@worldbank.org](mailto:xhou@worldbank.org)  
15

16  
17  
18 **12 M. Mahmud Khan, Ph.D.**

19 Health Policy and Management Department  
20 College of Public Health  
21 University of Georgia  
22 Wright Hall, Health Sciences Campus, 100 Foster Road, Athens, GA 30602  
23 [17 Mahmud.Khan@uga.edu](mailto:Mahmud.Khan@uga.edu)  
24  
25

26  
27  
28 **19 Justin Pulford, Ph.D.**

29 Senior Lecturer  
30 Department of International Public Health  
31 Liverpool School of Tropical Medicine  
32 [23 justin.pulford@lstm.ac.uk](mailto:justin.pulford@lstm.ac.uk)  
33  
34

35  
36 **25 Olga P. M. Saweri, MSc**

37 Papua New Guinea Institute of Medical Research (PNGIMR)  
38 PO Box 60, Goroka, EHP 441, Papua New Guinea  
39 [28 olga.saweri@gmail.com](mailto:olga.saweri@gmail.com)  
40  
41

42 30 Declarations of interest: none

43 31 Corresponding Author: M. Mahmud Khan, Ph.D., Professor, Health Policy and Management,  
44 32 College of Public Health, University of Georgia, 100 Foster Road, Wright Hall 116, Athens, GA  
45 33 30602. [Mahmud.Khan@uga.edu](mailto:Mahmud.Khan@uga.edu)  
46  
47

48 **35 Key words**

49  
50 36 Maternal Health, Emergency Obstetric Care, Readiness of health facilities, signal functions for  
51  
52 37 emergency obstetric care, Papua New Guinea  
53

54  
55 38 Total word count: 5,350 (excluding references, figures and tables)  
56

## Contributorship statement

**Xiaohui Hou:** Conceptualization, Methodology, Supervision, Project Administration, Resources, Writing-Original Draft, Writing – review & editing

**M. Mahmud Khan:** Conceptualization, Methodology, Supervision, Formal Analysis, Writing-Original Draft, Writing – review & editing

**Justin Pulford:** Conceptualization, Methodology, Data Curation, Data Validation, Writing-Review & Editing.

**Olga P. M. Saweri:** Data Curation, Data Validation, Writing-Review & Editing

## Details of funding source

This work was funded by World Bank's Trust Fund supported by Australia's Department of Foreign Affairs and Trade. World Bank contract number: 7171956, Principal Investigator: M. Mahmud Khan. Date: July 1, 2014.

## Data availability statement

No additional data is available. Researchers interested in 2015 PNG Facility Assessment Survey data can contact the PI of the project, Dr. M. Mahmud Khan, at the email address [Mahmud.Khan@uga.edu](mailto:Mahmud.Khan@uga.edu) with a statement on the reasons for requesting the dataset and types of analyses to be conducted.

## 1 **Abstract**

### 2 **Objective**

3 To measure readiness of health facilities in Papua New Guinea (PNG) to provide obstetric care  
4 and other maternal health services.

### 5 **Design**

6 Cross-sectional study involving random sample of health centers, district/rural hospitals (levels 3  
7 and 4 facilities) and all upper level hospitals operational at the time of survey. Structured  
8 questionnaires were used to collect data from health facilities.

### 9 **Setting**

10 Health facilities in PNG. Facility administrators and other facility personnel were interviewed.  
11 Number of facility personnel interviewed was usually one for health centers and two or more for  
12 hospitals.

### 13 **Participants**

14 19 upper-level facilities (levels 5-7, provincial, regional and national hospitals) and 60 lower-level  
15 facilities (levels 3 and 4, health centers and district/rural hospitals)

### 16 **Outcome measures**

17 Four service-types were used to understand readiness of surveyed health facilities in the  
18 provision of maternity care including obstetric care services: (1) facility readiness to provide  
19 clinical services; (2) availability of family planning items; (3) availability of maternal and neonatal  
20 equipment and materials; and (4) ability to provide emergency obstetric care.

### 21 **Results**

22 56% of lower level facilities were not able to provide Basic Emergency Obstetric Care (BEmOC).  
23 Even among higher level facilities, 16% were not able to perform one or more of the functions  
24 required to be considered a BEmOC provider. 11% of level 3 and 4 health facilities were able to  
25 provide comprehensive emergency obstetric care (CEmOC) as compared to 83% of higher level  
26 facilities.

### 27 **Conclusion**

28 Given the high fertility rate and maternal mortality ratio (MMR) in PNG, lack of BEmOC at the  
29 first level inpatient service providers is a major concern. To improve access to EmOC, level 3 and  
30 4 facilities should be upgraded to at least BEmOC providers. Significant reduction in MMR will  
31 require improved access to CEmOC and optimal geographic location approach can identify  
32 facilities to be upgraded.

33

### Strengths and limitations of this study

- This is the first empirical study that systematically examined availability of maternity care in health facilities in Papua New Guinea (PNG).
- All upper level hospitals and randomly selected fully functional health centers were surveyed.
- The readiness of facilities in the provision of obstetric care and actual provision of services were assessed using relevant indicators and signal functions.
- Service availability and readiness of facilities could not be linked with community level health outcomes.
- The sampling design selected fully functional health centers and district/rural hospitals in each of the surveyed districts implying overestimation of readiness and availability of obstetric care.

## 1 Introduction

2 Effective antenatal, neonatal and Emergency Obstetric Care (EmOC) are highly cost-effective  
3 interventions vital to avert common adverse pregnancy and/or birth outcomes, which  
4 significantly contribute to maternal mortality in poor resource settings.<sup>1-4</sup> Basic Emergency  
5 Obstetric Care (BEmOC) alone can avert a significant proportion of maternal deaths and up to 40%  
6 of neonatal deaths.<sup>5</sup> A global assessment found that BEmOC facilities are consistently not  
7 available in sufficient numbers in countries with high and moderate levels of maternal mortality.<sup>6</sup>  
8 Comprehensive Emergency Obstetric Care (CEmOC) availability, which includes the provision of  
9 caesarean and blood transfusion services in addition to the key functions included in BEmOC, is  
10 also quite poor in many low and middle income countries.<sup>7</sup>

11 Maternal and child health remains a key priority area in Papua New Guinea (PNG);<sup>8</sup> however,  
12 persistently high maternal and neonatal deaths reflect numerous deficiencies. The estimates of  
13 Maternal Mortality Ratio (MMR) in PNG vary considerably. One study by Mola and Kirby  
14 estimated the MMR for 2009 using facility-based health information system records and survey  
15 data on maternal mortality among unsupervised births from one province. The estimates imply  
16 that the average MMR in PNG should be approximately 500 per 100 000 live births.<sup>9 10</sup> The  
17 neonatal mortality in PNG is also high, around 28 per 1000 live births.<sup>11</sup> The World Health  
18 Organization model ranks PNG 130<sup>th</sup> in the world in terms of MMR.<sup>12</sup> The 2016-2018 PNG  
19 Demographic and Health Survey (DHS), using the sisterhood method, found that the MMR was  
20 about 205 per 100,000 live births.<sup>13</sup> Even though new DHS estimate represents a significant  
21 improvement from the previous estimate of 733 per 100,000 live births in 2006, the maternal  
22 mortality in PNG remains about 24 times the MMR in neighboring Australia.<sup>12</sup> The DHS report  
23 also indicates that only 17% of pregnancies received a prenatal visit in the first trimester and 49%  
24 had four or more prenatal visits over the whole pregnancy. During 2012-2017, about 55% of  
25 deliveries in PNG were supervised by trained health workers at health facilities<sup>13</sup> indicating  
26 limited access to modern maternal health care services.

27 To reduce the MMR in any country, it is important to understand the causes of death so that  
28 appropriate interventions can be designed and adopted. In PNG, the maternal mortality registry  
29 often does not report causes of death. Reviewing the causes of deaths mentioned in the general  
30 death registry and in maternal mortality registry, one study in early 1980s found that the main  
31 causes were puerperal sepsis, postpartum hemorrhage, medical and surgical complications,  
32 prolonged or obstructed labor, ruptured uterus, deaths associated with caesarean section.<sup>14</sup> It is  
33 likely that many of these causes of deaths have remained important even today. Clearly, deaths  
34 due to the causes indicated above cannot be avoided without timely access to health facilities  
35 that are equipped to provide a range of obstetric care services. A recent article mentioned  
36 geographically dispersed population, shortage of health care providers, poverty, gender  
37 inequality and low level of education as important determinants of maternal deaths.<sup>15</sup> These  
38 aspects are, however, directly related to access to care and readiness of health facilities in the  
39 provision of maternity care.

1  
2  
3 1 Lifetime risk of maternal death depends on the probability of maternal death per pregnancy and  
4 2 the average number of pregnancies per woman over the reproductive age. The 2016-2018 PNG  
5 3 DHS estimated that total fertility rate (TFR) was about 4.2 per woman, which is slightly lower than  
6 4 the TFR of 4.4 in 2006. Access to obstetric care and lifetime risk of maternal death can be  
7 5 improved by lowering the TFR as well.  
8  
9

10 6 Given the critical importance of timely access to appropriate obstetric care, it is essential to  
11 7 assess the ability and readiness of health facilities in the provision of emergency obstetric care in  
12 8 PNG. Due to high TFR of PNG, the demand for maternal health services will continue to increase  
13 9 rapidly, underscoring the urgent need for improving access to care and strengthening maternal  
14 10 healthcare service delivery.  
15  
16

17 11 Despite the high social value of maternal and newborn health care services in PNG, no macro-  
18 12 level information is available on the ability or readiness of health facilities in the provision of the  
19 13 services. One recent study assessed the capacity of 21 health facilities in the provision of essential  
20 14 surgery and anesthesia services.<sup>16</sup> No study on PNG, to date, has examined the readiness and  
21 15 ability of health facilities at the national level in the provision of obstetric care services. This study  
22 16 is the first attempt to understand the state of obstetric care availability in PNG.  
23  
24  
25

26 17 The principal objective of this study is to measure health facility readiness to provide obstetric  
27 18 care and other maternal health services. Some of the measures reflect not only the readiness of  
28 19 the facilities in the provision of target services but also the quality of services offered. The  
29 20 nationally representative health facility survey allows measurement of various indicators of  
30 21 obstetric care services. These measures will be useful for policy makers to reform the health care  
31 22 delivery system to strengthen the provision of obstetric care and general clinical services.  
32  
33  
34

## 35 23 **Methods**

### 36 24 *Conceptual Framework*

37 25 We use the Donabedian's framework to analyze the readiness of obstetric care and other related  
38 26 services offered through the health facilities in PNG. In general, the Donabedian's approach is  
39 27 used to evaluate quality of care by analyzing relevant structures, processes and outcomes.<sup>17</sup> The  
40 28 structure measures affect processes and then processes affect outcomes, as shown in figure 1.  
41 29 In this study, our focus is on the evaluation of 'structure' and 'process' measures relevant for  
42 30 maternity care. The structure and process variables help to better understand the ability of  
43 31 health facilities in the provision of different service-types. Although, the impact of service  
44 32 provision cannot be directly measured from the facility survey data, country-level estimates of  
45 33 maternal mortality and morbidity imply relatively poor outcomes indicating the need for  
46 34 improving infrastructure and processes associated with obstetric and other maternity services.  
47  
48  
49  
50  
51

52 35 To evaluate the ability and readiness to provide general medical care services including obstetric  
53 36 care, health facilities should have several infrastructural characteristics and resources. Some of  
54 37 the structural measures are quite general, related to the provision of any clinical service, such as  
55  
56  
57  
58  
59  
60

1  
2  
3 1 general inpatient services. In addition, specific personnel, supplies and drugs must be available  
4 2 at the facility to be able to offer the right type of services at the right time based on the clinical  
5 3 needs of patients. The structural characteristics, although not directly related to maternity care,  
6 4 are the necessary aspects defining the “readiness” of the facility in the provision of effective  
7 5 health care services. Readiness, however, does not necessarily imply actual provision of services.  
8 6 The infrastructural aspects act as the foundation for the provision of services, and relevant health  
9 7 care resources must be combined with the infrastructure to offer services to patients whenever  
10 8 needed. The process variables reflect ability to offer different types of obstetric care services and  
11 9 functions. The process variables for monitoring obstetric care service provision, the signal  
12 10 functions, are well defined and we will use the facility-level signal functions for understanding  
13 11 the readiness of facilities in PNG.<sup>18</sup>

### 12 *Study Setting*

13 PNG is remarkably diverse with respect to geography, language, and infrastructure. The country  
14 14 is divided into 22 provinces across four regions (Highlands, Momase and Southern, and the New  
15 15 Guinea Islands). Most of the country’s 8 million people live in rural or peri-urban communities  
16 16 and are faced with significant challenges with regard to equitable access to health, education and  
17 17 economic opportunities.

18 PNG has a government-funded health system throughout much of the country. It is  
19 19 supplemented by government-subsidized health services provided by various Christian missions.  
20 20 Overall, it is estimated that churches provide 47 percent of primary health services, particularly  
21 21 in rural areas.<sup>19</sup>

22 Health facilities are categorized by the number and cadre of health workers employed and the  
23 23 services they provide and are detailed in the National Health Services Standard (NHSS) of the  
24 24 Government of PNG (GoPNG).<sup>20</sup> The levels of health facilities in PNG are numbered 1 through 7,  
25 25 where levels 1 and 2 provide basic primary health care, specifically outpatient services only. Level  
26 26 3 health facilities, or health centers, provide outpatient and basic inpatient services for deliveries  
27 27 and minor ailments requiring observation. Level 4 health facilities, district and rural hospitals,  
28 28 provide general admissions, limited clinical support services including basic pharmacy and  
29 29 laboratory services, and depending on the employment of a medical officer, may provide surgical  
30 30 intervention services. Levels 5 to 7 health facilities provide secondary and tertiary health services  
31 31 as well as clinical support services, including pharmacy, laboratory, and radiology. The only level  
32 32 7 health facility, the Port Moresby General Hospital, is the largest and most advanced health care  
33 33 facility of PNG, employs the largest concentration of health care workers and provides  
34 34 comprehensive health care services.

### 35 *Survey Design*

36 We conducted a health facility survey of 73 health facilities in PNG in 2015. All operational upper  
37 37 level health facilities (levels 5 to 7) were selected for the survey. At the time of data collection,



1 PNG had 19 upper-level health facilities and all these 19 facilities were surveyed (although one  
2 of the facilities was not fully operational). The upper-level health facilities in the survey included  
3 the national referral hospital (Port Moresby General Hospital), three regional hospitals, and 15  
4 provincial hospitals. At the national level, since about half of health centers and district/rural  
5 hospitals (levels 3 and 4) were Church-run, the survey design intended to sample equal number  
6 of publicly-run and Church-run facilities. For selecting facilities at these two levels, between six  
7 (New Guinea Islands) and eight (Southern, Highlands, and Momase) districts were randomly  
8 selected per region. The largest government- and Church-administered health facilities (one of  
9 each type based on outpatient numbers per annum as reported by the National Health  
10 Information System) were purposely selected per district. This sampling procedure allowed  
11 selection of 30 publicly run and 30 church-run facilities from the selected districts; however,  
12 during field visits, not all selected facilities were found to be operational. Where possible, closed  
13 health facilities were replaced by functional ones within the same district. In some districts there  
14 were no functional level 3 or 4 facilities, resulting in less than 60 facilities surveyed (N=54). Figure  
15 2 shows the location of the health facilities surveyed for this study. The provinces shaded in green  
16 indicate where the survey was carried out. The red squares represent level 5 to 7 health facilities,  
17 while the blue squares represent levels 3 and 4.

### 18 *Survey Procedure*

19 The survey comprised of a health facility assessment and costing instrument as well as interviews  
20 with healthcare providers, inpatients, and outpatients. Each instrument is detailed in the survey  
21 report.<sup>21</sup> The facility assessment questionnaire can be found in the supplementary file of the  
22 article. Briefly, the health facility assessment collected information on various operational  
23 aspects of each health facility, while the costing instrument detailed expenditure on human  
24 resources, equipment, and consumables utilized for the provision of healthcare services. Both  
25 these instruments were completed with health facility managers and administrators. Upper level  
26 facilities offered many different types of specialized services and data collection at these levels  
27 required interviewing multiple facility personnel. The data collection was done by a team of 5  
28 trained enumerators, who spent three to five days surveying each health facility. In total, 73  
29 health facilities were surveyed.

### 30 *Informed consents for the survey*

31 For health facility costing and assessment, the survey team requested consent via email from the  
32 provincial, district and church health services, depending upon the facility to be surveyed. In  
33 addition, consent was requested from the officer in charge of each of the health facilities. The  
34 travel plan to the facilities was finalized after the consents were granted. Upon the team's arrival  
35 in the facility, the supervisor of the team met the officer in charge to confirm the consent  
36 received earlier and to get verbal consent to initiate the interviews.

37 For interviews with health care workers and patients, informed consent was requested in writing.  
38 The interviews were conducted only after the consents were granted. As much as possible, visual



1  
2  
3 1 and audible privacy was ensured for the interviews. All interview questionnaires were de-  
4 2 identified by assigning a code number. The code numbers are saved on a secure server at the  
5 3 PNGIMR.

#### 6 4 *Public Involvement*

7  
8 5 Stakeholder consultations were involved in the design and early dissemination of this research.  
9 6 During the feasibility stage, priority of research questions, choice of outcome measures, and  
10 7 methods were informed by discussions with stakeholders involving representatives from the  
11 8 National Department of Health, UN agencies, academics and other development partners in  
12 9 PNGs. The preliminary findings were also discussed with representatives from the National  
13 10 Department of Health, Provincial Health Authorities, hospitals and development partners in a  
14 11 stakeholder consultation workshop held in Port Moresby, PNG.

#### 15 12 *Ethics approval*

16 13 The study was approved by the PNG Institute of Medical Research (IMR) Institutional Review  
17 14 Board (IRB) and the PNG Medical Research Advisory Committee (MRAC). The following approval  
18 15 numbers were allocated to the study: IRB No. 1414, 7 August 2014; MRAC No 14.26, 10  
19 16 November 2014.

#### 20 17 *Outcome measures*

21 18 The handbook on monitoring emergency obstetric care<sup>18</sup> identified a set of indicators to measure  
22 19 availability, access and provision of EmOC in a country or a region. Two types of measures were  
23 20 defined -the first type focuses on availability, adequate coverage and utilization of services at  
24 21 national or sub-national levels and the second type measures obstetric care related functions  
25 22 performed by health facilities. The functions identified to define the level of EmOC services  
26 23 offered from a health facility are: (1) Administer parenteral antibiotics, (2) Administer uterotonic  
27 24 drugs, (3) Administer parenteral anticonvulsants, (4) Manually remove the placenta, (5) Remove  
28 25 retained products, (6) Perform assisted vaginal delivery, (7) Perform basic neonatal resuscitation,  
29 26 (8) Perform surgery (e.g., caesarean section), and (9) Perform blood transfusion. When a facility  
30 27 can perform all the functions listed under 1-7, it is considered a Basic EmOC (BEmOC) provider  
31 28 while ability to perform all the nine functions defines the comprehensive EmOC (CEmOC)  
32 29 provider. This study has used these nine measures to categorize health facilities as either a  
33 30 BEmOC or a CEmOC. Note that all these signal functions are defined by the ability to perform  
34 31 specific functions pregnant women need at the time of delivery. Ability to perform the functions  
35 32 does not necessarily imply that the facilities actually provided the services in the recent past.

36 33 Since this study is based on facility-level survey data, community or patient related health  
37 34 outcome measures are not directly observable. To compensate for this, we have used additional  
38 35 measures to understand readiness of health facilities in the provision of general inpatient care.  
39 36 Availability of basic medical equipment and supplies and physical condition of the facility  
40 37 (infrastructural variables) may affect willingness of clients to utilize services from the facilities.

1  
2  
3 1 Another important intervention that may affect the demand for EmOC is the provision of family  
4 2 planning services. Family planning in PNG is expected to reduce total fertility rate implying that  
5 3 need for maternity services should decline with family planning. Therefore, in addition to nine  
6 4 EmOC functions listed above, other outcome variables considered in this analysis are: (a)  
7 5 readiness of facilities to provide clinical services; (b) availability of family planning items; and (c)  
8 6 availability of maternity care related equipment and materials. Availability of drugs and supplies  
9 7 is defined as having the item in stock at the time of the survey.

10 8 For the availability of equipment, instruments and supplies, several indexes were calculated to  
11 9 indicate degree of availability of the items. The index values range from 0 to 100, 100 implying  
12 10 that all the items used for the construction of the index were available in all the facilities surveyed.

### 13 11 *Calculating readiness or availability index*

14 12 The analysis has used facility level data to derive the readiness indicators and ability to perform  
15 13 signal functions for each facility in the survey (Stata version 12 was used). The results are  
16 14 presented as descriptive tables (Tables 1-4) to indicate the proportion of facilities having the  
17 15 instruments or able to perform the specific functions.

18 16 An equally weighted index was constructed based on the availability of the items included in each  
19 17 of the categories of service delivery. It reflects the percent of all readiness aspects or variables  
20 18 satisfied by the health facilities in a specific category. For example, if a facility reports having an  
21 19 instrument, a value of 1.0 was assigned for the facility for that equipment. The availability index  
22 20 was constructed to show the percent of listed equipment and items available in each of the  
23 21 facility categories. For example, if the family planning items availability index is 65 for level 3 and  
24 22 4 facilities, it means that the facilities on the average had 65 percent of all the family planning  
25 23 equipment and items considered in the analysis.

## 26 24 **Results**

### 27 25 *Facility readiness to provide clinical services*

28 26 Table 1 reports facility readiness in the provision of services. As shown, 95% of level 5 to 7  
29 27 facilities were connected to the main electric supply grid but only about a third of level 3 and 4  
30 28 facilities. However, more than 80% of all facilities connected to the electric supply experienced  
31 29 blackout at least for some time in the week before the survey. All level 5 to 7 facilities had  
32 30 functional backup generators, while the percentage of level 3 and 4 facilities with backup  
33 31 generators was 76% for church-run facilities and 48% for public facilities. Half of the level 3 and  
34 32 4 facilities with backup generators reported problems in operating the generator in the previous  
35 33 month.

36 34 If supply line and water tanks are considered, all level 5 to 7 facilities and 83% of level 3 and level  
37 35 4 public health facilities and 84% of level 3 and level 4 church health facilities reported having  
38 36 access to water on the day of the survey. However, less than 10% of level 3 and 4 facilities were  
39 37 connected with water supply lines. Only 45% of level 3 and 4 public facilities had water

1  
2  
3 1 connection to the delivery room (and water availability on the day of the survey) compared to 72%  
4 2 at church-run facilities.

6 3 A significant share of health facilities, 62%, 44% and 38% of level 3 and 4 public, level 3 and 4  
7 4 church, and level 5 and 6 facilities, respectively, experienced water shortages in 2014. The survey  
8 5 asked facility respondents whether the facility was responsible for maintaining the water supply  
9 6 system and it was observed that about 45% of public level 3-4 facilities were responsible for  
10 7 maintaining the water supply system. The proportions were 64% for church-run level 3 and 4  
11 8 facilities and 68% for level 5 to 7 facilities.

15 9 Only 3 public (10%) and 3 church (12%) level 3 and 4 health facilities had ability to do direct blood  
16 10 transfusion. Proportion of facilities which could do blood transfusion was much higher, 89%  
17 11 among level 5 and 6 facilities and 100% for level 7. Percentage of health facilities that had  
18 12 operations theatre were much higher. 28% and 36% level of public and church level 3-4 health  
19 13 facilities and all level 5-7 health facilities had at least one operation theatre.

22 14 Both level 3 and 4 public and church-run health facilities show low readiness score for service  
23 15 delivery (Table 1). Readiness indexes were 40.3 for level 3 and 4 public sector facilities, 48.6 for  
24 16 level 3 and 4 church-run facilities, 84.6 for level 5 and 6 facilities, and 100 for the level 7 facility.

#### 27 17 *Availability of Family Planning Items*

29 18 Table 2 presents the availability of family planning products and supplies in surveyed health  
30 19 facilities. The availability index of family planning items was 81.6 for level 3 and 4 public sector  
31 20 health facilities, 84.0 for level 3 and 4 church-run facilities, and 88.9 for level 5 and 6 facilities.  
32 21 Non-availability of family planning injections in the level 7 facility reduced the overall index of  
33 22 family planning item availability for the facility to 66.7. Since there is only one facility at level 7,  
34 23 non-availability of even a single item significantly reduces the overall index.

#### 37 24 *Availability of supplies and equipment for maternity care*

39 26 A relatively large proportion of health facilities lacked very basic pregnancy and antenatal care  
40 27 related supplies and equipment as shown in table 3. The index values for the availability of  
41 28 antenatal care items were 76.9 and 88.6 for level 3 and 4 public- and Church-run facilities,  
42 29 respectively. The index was 87.3 for level 5 and 6 facilities and 100 for level 7 facility. The index  
43 30 of availability of obstetric and neonatal care items were worse in level 3 and level 4 facilities, 70.6  
44 31 and 80.5 respectively for public and church facilities. The index was 95.52 for level 5 and 6  
45 32 facilities. The survey also asked about the availability of vacuum extractors and forceps in the  
46 33 facilities for conducting deliveries. It is interesting that 74% of facilities reported having vacuum  
47 34 extractors and 95% reported having forceps although forceps are not used in PNG for deliveries.

#### 52 35 *Ability to provide emergency obstetric care services*

54 36 Table 4 indicates the percent of facilities able to perform different obstetric functions. As  
55 37 mentioned earlier, WHO has defined nine functions to understand the level of obstetric services

1 provided from the facilities. The survey questionnaire combined first three signal functions  
2 (capacity to administer parenteral antibiotics, uterotonic drugs, parenteral anticonvulsants) into  
3 one and asked the respondents to report if the facility was able to perform all the three functions,  
4 two of the three or one of the three functions. Most level 3-4 facilities (about 80%) reported the  
5 ability to perform all these three functions. Two facilities at upper levels (levels 5-7) were not  
6 able to perform these three basic obstetric functions. One of the upper level facilities in the  
7 sample was not fully functional at the time of the survey. Ability to perform the signal functions  
8 1 to 7 defines the “Basic EmOC” provider and table 4 shows that 38% of Church-run level 3-4  
9 facilities and 52% of government-run level 3-4 facilities were BEmOC providers. Even among  
10 higher level facilities (levels 5, 6 and 7), 16% of facilities were not able to perform one or more of  
11 the necessary functions required to be considered a BEmOC provider.

12 If the signal functions for comprehensive emergency obstetric care are considered (all nine signal  
13 functions), only about 11% of level 3 and 4 health facilities were found to be CEmOC units. About  
14 15% of level 3 and 4 facilities had the capacity to manage a caesarean section or do blood  
15 transfusion. Not all level 5 to 7 facilities were CEmOC providers – four of the 19 upper level  
16 facilities were not able to perform at least one of the nine signal functions.

## 17 Discussion

18 The overall health facility infrastructural condition in PNG is quite poor. Most facilities reported  
19 the need for major building repairs and emphasized the lack of adequate toilets, stable electrical  
20 supply, and consistent water supply. Many level 3 and 4 health facilities required better  
21 connectivity to electricity and clean water supply. One significant concern is the number of health  
22 facilities that did not have running water in the facility’s delivery room. The quantity and quality  
23 of different types of clinical services provided crucially depends on the facility’s readiness to offer  
24 services in general. Overall, level 3 and 4 facilities, both public and Church-run, scored low on the  
25 readiness index, implying that these facilities were not very reliable providers of services and  
26 patient-confidence in these facilities are likely to be low. The survey also revealed the need for  
27 improving the supply of basic medical items at level 3 and 4 public health facilities. Level 3 and 4  
28 public facilities show lower availability of different medical items compared to those in Church-  
29 run facilities.

30 Comparison of health facility readiness across countries is often tricky because of differences in  
31 the level and comprehensiveness of facilities in different countries of the world. A World Bank  
32 report<sup>22</sup> indicates that 98 percent of public hospitals in Indonesia had electricity; in Laos, the  
33 index of basic amenities was reported as 64 percent<sup>23</sup> compared to 58 percent for PNG (weighted  
34 mean of the values in table 1).

35 This study showed that the index of availability of family planning supplies in levels 3 and 4 was  
36 about 83%. Family planning supplies should be available in all facilities, especially at the lower  
37 levels, to ensure uninterrupted access at all times, which is clearly not the case for PNG. In  
38 addition, availability of family planning supplies does not necessarily mean utilization of services.

1  
2  
3 1 The findings from the most recent PNG DHS survey showed access to family planning services  
4 2 quite limited. One quarter of currently married women (26%) have an unmet need for family  
5 3 planning, and only 59% of currently married women are satisfied with family planning services.  
6 4 Among those who have received family planning, about 9 in 10 users obtained their modern  
7 5 family planning supplies from a public (government) source. Therefore, there is an urgent need  
8 6 to identify potential gaps in the provision and utilization of family planning services to strengthen  
9 7 service provision from the government health facilities, especially at lower levels. Better access  
10 8 and utilization of family planning services can help reduce maternal and child mortality.<sup>24-26</sup>  
11 9

12 10 While 79% of level 5 to 7 facilities were found to be CEmOC providers, the fact that about a fifth  
13 11 were not able to provide comprehensive emergency obstetric care is a major concern, given that  
14 12 these are the higher level referral hospitals in PNG. Consistent with the findings of this study,  
15 13 another study using a much smaller sample of facilities, concluded that the “Capacity for essential  
16 14 surgery and anesthesia services is severely limited in PNG due to shortfalls in physical  
17 15 infrastructure, human resources, and basic equipment and supplies.”<sup>16</sup>

18 16 The results from the survey can be used to derive national level estimates of obstetric care  
19 17 availability. Using the proportions of CEmOC facilities at different levels and the total number of  
20 18 facilities in PNG at these levels, the total number of facilities ready to provide comprehensive  
21 19 obstetric care was only 50 at the time of the survey in 2015. Even if we arbitrarily assume  
22 20 balanced geographic distribution of these facilities, an emergency obstetric case will have to  
23 21 travel 53 km each way, on average, to reach a CEmOC facility. The distance to the nearest CEmOC  
24 22 facility is so large that for many emergency cases this is virtually synonymous of not having access  
25 23 to CEmOC. To reduce maternal mortality and morbidity significantly, it is essential to lower the  
26 24 average distance to the nearest CEmOC facility<sup>27</sup> implying that PNG will have to upgrade a  
27 25 significant number of levels 3, 4 and 5 facilities. Geographic information systems and  
28 26 geographical modelling tools can help identify the optimal location of CEmOC facilities and  
29 27 existing facilities closest to the optimal locations can be upgraded in the short-run to improve  
30 28 access.<sup>28</sup>

31 29 All facilities at level 3 or above should be able to provide basic EmOC. To improve access to  
32 30 emergency obstetric care, most level 3 and 4 facilities should be considered for immediate  
33 31 upgrading to BEmOC provider or better. The survey of facilities indicated that about 45 percent  
34 32 of levels 3 and 4 facilities were not ready to provide BEmOC. Despite this low readiness, equipping  
35 33 about 15 to 20% of these facilities to perform signal functions 5 and 6 can improve BEmOC  
36 34 availability from 55% of the facilities to about 80%. Although maternal and child health is a  
37 35 priority area, PNG has not allocated enough resources to achieve improved access to maternity  
38 36 and neonatal services. PNG spends more than 4.3% of its GDP on health (about \$109 per capita  
39 37 in PPP dollars). Total health expenditure is not low compared to other countries with similar level  
40 38 of per capita income.<sup>29</sup> However, a significant part of health resources, including human  
41 39 resources, particularly doctors, are concentrated in a few major hospitals. Therefore, the  
42 40 resource allocation at the lower level health facilities (level 3 and level 4 facilities) are not



1  
2  
3 1 sufficient. Reallocation of public sector resources to lower level health facilities are needed to  
4 2 expand access to obstetric care and other preventive services.  
5

6  
7 3 To improve availability and access to quality maternity services in PNG, especially in remote rural  
8 4 areas, a program of training and upskilling of Community Health Workers was adopted.<sup>30</sup>  
9 5 Although the upskilling has increased utilization of basic maternity services, significant reductions  
10 6 in maternal mortality will require access to hospital-based obstetric care. Government of PNG  
11 7 may consider allocating funds to facilities, both public and church facilities, based on quantities  
12 8 of priority health services delivered rather than on number and mix of human resources and  
13 9 other administrative needs.<sup>31</sup> While the effectiveness of such performance based financing  
14 10 depend on how the schemes are implemented, evidence in low and middle income countries  
15 11 shows that the performance can be improved through financial incentives.<sup>32</sup> From the demand  
16 12 side, past research has found that providing pregnant women with health vouchers to ensure  
17 13 financial protection for accessing medical care has increased utilization of health services.<sup>33</sup> The  
18 14 payments received through the vouchers will also encourage facilities to become more sensitive  
19 15 to the needs of pregnant women and would have incentives to invest to become fully functional  
20 16 EmOC providers. An initiative in two provinces in PNG that provided incentive packages to  
21 17 pregnant women increased facility-based supervised birth rates by 80%<sup>34</sup> indicating that  
22 18 enhancing facility readiness combined with incentivizing pregnant women to utilize health  
23 19 facilities will be very effective in improving maternal and neonatal health.

### 20 ***Study Limitations***

21 Several limitations of the study should be mentioned here. First, it is not possible to indicate  
22 22 overall geographic access to primary health care services in PNG using the survey data because  
23 23 the study did not collect information from level 1 and 2 health facilities. However, these facilities  
24 24 do not provide obstetric care services although some basic services like family planning and  
25 25 antenatal care can potentially be organized at these levels. Second, the survey, strictly speaking,  
26 26 is not a representative survey of level 3 and 4 facilities. The survey design selected high-demand  
27 27 fully functional level 3 and 4 facilities in target districts and the definition of fully functional led  
28 28 to the choice of facilities that showed relatively high level of utilization. Therefore, if anything,  
29 29 the results are likely to be significant overestimations of degree of readiness of the facilities in  
30 30 the provision of obstetric care and other related services in PNG. Even with this favorable  
31 31 selection of facilities, the percent of facilities able to perform BEmOC and CEmOC was quite low  
32 32 at levels 3 and 4 implying that the availability of obstetric care services could be significantly  
33 33 worse than what has been reported in this study. Third, the study did not try to connect the  
34 34 service availability and readiness with health outcomes of the population at the subnational level.  
35 35 In PNG, even the national level estimates of mortality and morbidity are considered unreliable  
36 36 and subnational level estimates would suffer from even higher degree of error in estimation. In  
37 37 any case, facility level information clearly indicates that many of the functional facilities are not  
38 38 ready to provide obstetric health services and a significant proportion of facilities lack medical  
39 39 equipment, instruments and supplies for the provision of quality maternity and neonatal services.

## 1 **Conclusions**

2 Inability of a health facility, irrespective of whether it is a primary, secondary and tertiary care  
3 facility, to provide obstetric care and other related services is an important concern for any health  
4 care system. It is especially true for a country like PNG where maternal and infant mortalities are  
5 high alongside a high fertility rate. Improved availability and utilization of family planning services  
6 can help reduce the demand for EmOC, lower maternal and neonatal mortality/morbidity and  
7 improve access to maternity services. Lowering the need for maternity services through  
8 interventions like family planning, however, is unlikely to improve access to maternity care  
9 significantly in the short-run. Supply-side interventions are necessary to ensure that the services  
10 are available in strategically located health facilities. Improving facility infrastructure, equipping  
11 the facilities with essential medical equipment and supplies and ensuring the presence of trained  
12 personnel in health facilities are needed to make the facilities BEmOC or CEmOC providers. Since  
13 the number of facilities in PNG offering EmOC is quite low compared to the needs, all level 3 and  
14 4 facilities should be upgraded to at least the BEmOC level. Survey-based estimates suggest that  
15 only 50 facilities in PNG can be considered CEmOC providers and this number is inadequate to  
16 ensure equitable access to emergency obstetric cases. Increasing the number of CEmOC  
17 providers is urgently needed.

1

2 **Figure caption**

3

4 Figure 1. Three components of Donabedian approach of evaluating quality of care

5

6 Figure 2. Map of PNG with Districts Visited (green) and Location of Surveyed Facilities

7

For peer review only



1  
2  
3 **1 References:**  
4

- 5 2 1. Islam, M.T., et al., *Improvement of coverage and utilization of EmOC services in*  
6 3 *southwestern Bangladesh*. Int J Gynaecol Obstet, 2005. **91**(3): p. 298-305; discussion  
7 4 283-4.  
8 4  
9 5 2. Turab, A., et al., *Improved accessibility of emergency obstetrics and newborn care*  
10 6 *(EmONC) services for maternal and newborn health: a community based project*. BMC  
11 7 *Pregnancy Childbirth*, 2013. **13**: p. 136.  
12 8 3. Chavula, K., et al., *Readiness of hospitals to provide Kangaroo Mother Care (KMC) and*  
13 9 *documentation of KMC service delivery: Analysis of Malawi 2014 Emergency Obstetric*  
14 10 *and Newborn Care (EmONC) survey data*. J Glob Health, 2017. **7**(2): p. 020802.  
15 10  
16 11 4. Ameh, C.A., et al., *The effectiveness of training in emergency obstetric care: a systematic*  
17 12 *literature review*. Health Policy Plan, 2019. **34**(4): p. 257-270.  
18 12  
19 13 5. Lee, A.C., et al., *Care during labor and birth for the prevention of intrapartum-related*  
20 14 *neonatal deaths: a systematic review and Delphi estimation of mortality effect*. BMC  
21 15 *Public Health*, 2011. **11 Suppl 3**(Suppl 3): p. S10.  
22 16 6. Paxton, A., et al., *Global patterns in availability of emergency obstetric care*. Int J  
23 17 *Gynaecol Obstet*, 2006. **93**(3): p. 300-7.  
24 17  
25 18 7. Banke-Thomas, A., et al., *Assessing emergency obstetric care provision in low- and*  
26 19 *middle-income countries: a systematic review of the application of global guidelines*.  
27 20 *Glob Health Action*, 2016. **9**: p. 31880.  
28 20  
29 21 8. Government of Papua New Guinea, *National Health Plan 2011–2020, Volume 1: Policies*  
30 22 *and Strategies*. June 2010,.  
31 23 9. Mola, G. and B. Kirby, *Discrepancies between national maternal mortality data and*  
32 24 *international estimates: The experience of Papua New Guinea*. Reproductive health  
33 25 *matters*, 2013. **21**: p. 191-202.  
34 26 10. Robbers, G., et al., *Maternal and newborn health indicators in Papua New Guinea –*  
35 27 *2008–2018*. Sexual and Reproductive Health Matters, 2019. **27**(1): p. 52-68.  
36 27  
37 28 11. PNG National Department of Health, *Health Information Systems*. 2019.  
38 29 12. WHO, UNICEF, UNFPA, World Bank Group, and the United Nations Population Division.  
39 30 *Trends in Maternal Mortality: 2000 to 2017*. Geneva, World Health Organization, 2019.  
40 30  
41 31 13. National Statistical Office (NSO) [Papua New Guinea] and ICF, *Papua New Guinea*  
42 32 *Demographic and Health Survey 2016-18*. Port Moresby, Papua New Guinea, and  
43 33 *Rockville, Maryland, USA: NSO and ICF*. 2019.  
44 34 14. Mola, G., I Aitken, *Maternal mortality in Papua New Guinea 1976-1983*. PNG Medical  
45 35 *Journal*, 1984. **27**(2): p. 65-71.  
46 35  
47 36 15. Dennis, A.T., *Reducing Maternal Mortality in Papua New Guinea: Contextualizing Access*  
48 37 *to Safe Surgery and Anesthesia*. Anesthesia & Analgesia: January 2018. **126**(1): p 252-  
49 38 259. doi: 10.1213/ANE.0000000000002550  
50 39 16. Martin, J., Goa Tau, Meena Nathan Cherian, Jennifer Vergel de Dios, David Mills, Jane  
51 40 Fitzpatrick, William Adu-Krow & Davy Cheng, *Survey of the capacity for essential surgery*  
52 40 *and anaesthesia services in Papua New Guinea*. BMJ Open 2015;5: e009841.  
53 41 doi:10.1136/bmjopen-2015-009841.  
54 42

17. Donabedian, A., *Evaluating the Quality of Medical Care*. The Milbank Quarterly, 2005 83(4): p. 691-729 (reprint from 44(3): 166-203, 1966).
18. WHO, UNFPA, UNCEF, & AMDD, *Monitoring emergency obstetric care: a handbook. 2009*, Geneva: World Health Organization.
19. NDOH, *Christian Health Services Technical Assistance Mission Report*. 2013, National Department of Health: Port Moresby, Papua New Guinea.
20. Government of PNG (GoPNG), *National Health Service Standards for Papua New Guinea 2011-2020*, Volume 1, June 2011.
21. Khan, M. Mahmud, Xiaohui Hou, Olga PM Saweri, Ibrahim Demir, Rifat Haider, Shakil Ahmed and Justin Pulford, *Service Delivery by Health Facilities in Papua New Guinea: Report based on a countrywide health facility survey*, Washington DC: The World Bank Group. December 2017.
22. World Bank, *Universal Maternal Health Coverage? Assessing the Readiness of Public Health Facilities to Provide Maternal Health Care in Indonesia*. Washington, DC: World Bank. 2014.
23. World Bank, *Maternal Health Out-of-Pocket Expenditure and Service Readiness in Lao PDR*. Washington, DC: World Bank. 2013.
24. Chola L, McGee S, Tugendhaft A, Buchmann E, Hofman K. *Scaling Up Family Planning to Reduce Maternal and Child Mortality: The Potential Costs and Benefits of Modern Contraceptive Use in South Africa*. PLoS ONE 2015, 10(6): e0130077. doi:10.1371/journal.pone.0130077
25. Budi Utomo, B. , Purwa Kurnia Suchaya, Nohan Arum Romadlona, Annette Sachs Robertson, Riznawaty Imma Aryanty and Robert Joseph Magnani, *The impact of family planning on maternal mortality in Indonesia: what future contribution can be expected?* Population Health Metrics (2021) 19:2, <https://doi.org/10.1186/s12963-020-00245-w>
26. Winikoff, B. & Maureen Sullivan. *Assessing the Role of Family Planning in Reducing Maternal Mortality*, Studies in Family Planning , May - Jun., 1987, 18(3), p. 128-143
27. McKinnon, B., et al., *Distance to emergency obstetric services and early neonatal mortality in Ethiopia*. Trop Med Int Health, 2014. **19**(7): p. 780-90.
28. Ebener, S., et al., *Proposing standardised geographical indicators of physical access to emergency obstetric and newborn care in low-income and middle-income countries*. BMJ Glob Health, 2019. **4**(Suppl 5): p. e000778.
29. World Bank, *Health Financing System Assessment : Papua New Guinea*. World Bank, Washington, . 2017.
30. Mola, G., *Upskilling experienced female CHWs currently working in maternity care in rural health facilities in maternity care skills*, unpublished memo, December 2020.
31. Cairns, A. and Xiaohui Hou , *Financing the frontline : an analytical review of provincial administrations' rural health expenditure 2006-2012 . Health, Nutrition, and Population (HNP) discussion paper*. Washington, D.C. : World Bank Group. , in 2015: <https://hubs.worldbank.org/docs/ImageBank/Pages/DocProfile.aspx?nodeid=25991656>.
32. Paul, E. and D. Renmans, *Performance-based financing in the health sector in low- and middle-income countries: Is there anything whereof it may be said, see, this is new?* Int J Health Plann Manage, 2018. **33**(1): p. 51-66.

1  
2  
3  
4  
5  
6  
7  
8  
9  
10  
11  
12  
13  
14  
15  
16  
17  
18  
19  
20  
21  
22  
23  
24  
25  
26  
27  
28  
29  
30  
31  
32  
33  
34  
35  
36  
37  
38  
39  
40  
41  
42  
43  
44  
45  
46  
47  
48  
49  
50  
51  
52  
53  
54  
55  
56  
57  
58  
59  
60

1 33. CM, B., et al., *The impact of vouchers on the use and quality of health care in developing*  
2 *countries: a systematic review*. Glob Public Health, 2013. **8**(4): p. 363-88.  
3 34. Mola, G., A pioneering approach to birthing, PNG Attitude, December 2019.  
4 <https://www.pngattitude.com/2019/12/a-pioneering-approach-to-birthing.html>

For peer review only

**Table 1. Readiness Index for provision of general clinical services by Facility Level in Papua New Guinea**

| Readiness indicators                                                      | Level 3 and 4 |     |             |     | Level 5 and 6 |      | Level 7    |      |
|---------------------------------------------------------------------------|---------------|-----|-------------|-----|---------------|------|------------|------|
|                                                                           | Public        | %   | Church      | %   | N             | %    | N          | %    |
| Electricity connected to supply grid                                      | 10            | 34% | 7           | 28% | 17            | 94%  | 1          | 100% |
| Backup generator                                                          | 14            | 48% | 19          | 76% | 18            | 100% | 1          | 100% |
| Electricity availability (supply or generator)                            | 20            | 69% | 21          | 84% | 18            | 100% | 1          | 100% |
| Blackout last week                                                        | 8             | 28% | 6           | 24% | 15            | 83%  | 0          | 0    |
| Problem last month running generator due to fuel shortage                 | 8             | 28% | 10          | 40% | 3             | 17%  | 0          | 0    |
| Water from main line                                                      | 2             | 7%  | 3           | 12% | 15            | 83%  | 1          | 100% |
| Water shortage last year                                                  | 18            | 62% | 11          | 44% | 7             | 39%  | 0          | 0    |
| Water available for use by health care providers                          | 24            | 83% | 21          | 84% | 18            | 100% | 1          | 100% |
| Water available in delivery room                                          | 13            | 45% | 18          | 72% | 18            | 100% | 1          | 100% |
| Facility does direct blood transfusion                                    | 3             | 10% | 3           | 12% | 16            | 89%  | 1          | 100% |
| Blood transfusions done last month                                        | 3             | 10% | 3           | 12% | 18            | 100% | 1          | 100% |
| Facility has designated space for clinicians to provide service           | 20            | 69% | 20          | 80% | 18            | 100% | 1          | 100% |
| Facility has on-call room or space for health care providers to take rest | 3             | 10% | 11          | 44% | 10            | 56%  | 1          | 100% |
| Facility has telephone or shortwave radio                                 | 14            | 48% | 14          | 56% | 15            | 83%  | 1          | 100% |
| Facility has ambulance                                                    | 26            | 90% | 24          | 96% | 17            | 94%  | 1          | 100% |
| Ambulance out of service last year                                        | 11            | 38% | 10          | 40% | 6             | 33%  | 0          | 0    |
| Facility has other vehicles                                               | 8             | 28% | 5           | 20% | 18            | 100% | 1          | 100% |
| Facility has operation theatre                                            | 8             | 28% | 9           | 36% | 18            | 100% | 1          | 100% |
| <b>Index of readiness</b>                                                 | <b>40.3</b>   |     | <b>48.5</b> |     | <b>84.6</b>   |      | <b>100</b> |      |

Source: 2015 Survey of health facilities in PNG (survey conducted by this study)

1 **Table 2. Availability of Family Planning Items by Facility Level in Papua New Guinea**

| Family planning (FP) items | Level 3 and 4 facilities |             |             |             | Level 5 and 6 facilities |                    | Level 7 facilities |              |
|----------------------------|--------------------------|-------------|-------------|-------------|--------------------------|--------------------|--------------------|--------------|
|                            | # of Public              | % of Public | # of Church | % of Church | # of Public              | % of Level 5 and 6 | # of Public        | % of Level 7 |
| Oral pills                 | 26                       | 90%         | 21          | 84%         | 17                       | 94%                | 1                  | 100%         |
| FP injections              | 22                       | 76%         | 22          | 88%         | 15                       | 83%                | 0                  | 0%           |
| Condoms                    | 23                       | 79%         | 20          | 80%         | 16                       | 89%                | 1                  | 100%         |
| <b>Index of FP items</b>   | <b>81.6</b>              |             | <b>84.0</b> |             | <b>88.9</b>              |                    | <b>66.7</b>        |              |

2 *Source: 2015 Survey of health facilities in PNG (survey conducted by this study)*

3  
 4  
 5  
 6  
 7  
 8  
 9  
 10  
 11  
 12  
 13  
 14  
 15  
 16  
 17  
 18  
 19  
 20  
 21  
 22  
 23  
 24  
 25  
 26  
 27  
 28  
 29  
 30  
 31  
 32  
 33  
 34  
 35  
 36  
 37  
 38  
 39  
 40  
 41  
 42  
 43  
 44  
 45  
 46  
 47  
 48  
 49  
 50  
 51  
 52  
 53  
 54  
 55  
 56  
 57  
 58  
 59  
 60

22

For peer review only - <http://bmjopen.bmj.com/site/about/guidelines.xhtml>

**Table 3. Availability of Supplies and Equipment for Maternity Care in PNG by Health Facility Level**

| Antenatal, pregnancy, obstetric and neonatal care related equipment and supplies | Level 3 and 4 facilities |             |              |             | Level 5 and 6 facilities |      | Level 7 facility |      |
|----------------------------------------------------------------------------------|--------------------------|-------------|--------------|-------------|--------------------------|------|------------------|------|
|                                                                                  | # of Public              | % of Public | # of Church  | % of Church | # of Public              | %    | # of Public      | %    |
| Foetal stethoscope (or monitor)                                                  | 27                       | 93%         | 25           | 100%        | 14                       | 78%  | 1                | 100% |
| Stethoscope and blood pressure cuff                                              | 22                       | 76%         | 25           | 100%        | 16                       | 89%  | 1                | 100% |
| Tape measure                                                                     | 23                       | 79%         | 22           | 88%         | 16                       | 89%  | 1                | 100% |
| Scale                                                                            | 28                       | 97%         | 25           | 100%        | 16                       | 89%  | 1                | 100% |
| Ultrasound machine (and gel)                                                     | 28                       | 97%         | 25           | 100%        | 17                       | 94%  | 1                | 100% |
| Stethoscope                                                                      | 10                       | 34%         | 11           | 44%         | 15                       | 83%  | 1                | 100% |
| Pelvic procedure instruments such as speculum                                    | 18                       | 62%         | 22           | 88%         | 16                       | 89%  | 1                | 100% |
| <b>Index: availability of antenatal care items</b>                               | <b>76.85</b>             |             | <b>88.57</b> |             | <b>87.30</b>             |      | <b>100</b>       |      |
| Delivery light                                                                   | 24                       | 83%         | 24           | 96%         | 18                       | 100% | 1                | 100% |
| Partograph                                                                       | 11                       | 38%         | 13           | 52%         | 14                       | 78%  | 1                | 100% |
| Sterilizer                                                                       | 15                       | 52%         | 16           | 64%         | 13                       | 72%  | 1                | 100% |
| Vacuum extractor                                                                 | 14                       | 48%         | 21           | 84%         | 18                       | 100% | 1                | 100% |
| Forceps                                                                          | 25                       | 86%         | 25           | 100%        | 18                       | 100% | 1                | 100% |
| Manual vacuum aspirator/suction bulb                                             | 27                       | 93%         | 25           | 100%        | 17                       | 94%  | 1                | 100% |
| Facility has at least two skilled birth attendants covering 24 hours a day       | 21                       | 72%         | 19           | 76%         | 18                       | 100% | 1                | 100% |
| Delivery kit (instruments, supplies)                                             | 25                       | 86%         | 25           | 100%        | 18                       | 100% | 1                | 100% |
| Resuscitation bag, newborn                                                       | 4                        | 14%         | 4            | 16%         | 15                       | 83%  | 1                | 100% |
| Eye drops or ointment for newborn                                                | 27                       | 93%         | 25           | 100%        | 18                       | 100% | 1                | 100% |
| Needles and syringes                                                             | 28                       | 97%         | 25           | 100%        | 18                       | 100% | 1                | 100% |
| Sterile C-section instrument kits                                                | 28                       | 97%         | 25           | 100%        | 18                       | 100% | 1                | 100% |
| Cord supplies for newborn: clamps, ties, scissors                                | 2                        | 7%          | 5            | 20%         | 12                       | 67%  | 1                | 100% |
| IV sets, including sterilized needle and tube                                    | 27                       | 93%         | 25           | 100%        | 17                       | 94%  | 1                | 100% |
| IV fluids, including normal saline and ringer lactate                            | 29                       | 100%        | 25           | 100%        | 18                       | 100% | 1                | 100% |
| <b>Index: availability of obstetric and neonatal care items</b>                  | <b>70.57</b>             |             | <b>80.53</b> |             | <b>92.52</b>             |      | <b>100</b>       |      |

Source: 2015 Survey of health facilities in PNG (survey conducted by this study)

**Table 4. Percentage of Health Facilities Able to Perform Signal Functions with Categorization of Facilities into Basic Emergency Obstetric Care and Comprehensive Emergency Obstetric Care Providers**

| Signal functions for obstetric and neonatal care                                                                        | Ability to perform    | Level 3 and 4 public % (n) | Level 3 and 4 church % (n) | Level 5 to 7 % (n) | Total % (n) |
|-------------------------------------------------------------------------------------------------------------------------|-----------------------|----------------------------|----------------------------|--------------------|-------------|
| Signal functions 1-3: Have capacity to administer parenteral antibiotics, uterotonic drugs, parenteral anticonvulsants? | Yes, all three        | 76% (22)                   | 80% (20)                   | 89% (17)           | 81% (59)    |
|                                                                                                                         | Yes, two of the three | 10% (3)                    | 16% (4)                    | 5% (1)             | 11% (8)     |
|                                                                                                                         | Yes, one of the three | 3% (1)                     | 4% (1)                     | 0% (0)             | 3% (2)      |
| Signal function 4: Have the ability for manual removal of placenta?                                                     | Yes                   | 72% (21)                   | 88% (22)                   | 95% (18)           | 84% (61)    |
| Signal function 5: Have ability to remove retained products?                                                            | Yes                   | 59% (17)                   | 80% (20)                   | 95% (18)           | 75% (55)    |
| Signal function 6: Have the capacity to perform assisted vaginal delivery?                                              | Yes                   | 59% (17)                   | 72% (18)                   | 89% (17)           | 71% (52)    |
| Signal function 7: Have ability to Perform basic neonatal resuscitation                                                 | Yes                   | 72% (21)                   | 96% (24)                   | 95% (18)           | 86% (63)    |
| Signal function 8: Have ability to perform surgery and manage caesarean section                                         | Yes                   | 14% (4)                    | 16% (4)                    | 95% (18)           | 36% (26)    |
| Signal function 9: Have capacity to do safe blood transfusion                                                           | Yes                   | 14% (4)                    | 20% (5)                    | 89% (17)           | 36% (26)    |
| Ability to perform first seven signal functions                                                                         | Basic EmOC            | 38% (11)                   | 52% (13)                   | 84% (16)           | 55% (40)    |
| Ability to perform all nine signal functions                                                                            | Comprehensive EmOC    | 10% (3)                    | 12% (3)                    | 79% (15)           | 29% (21)    |

Source: 2015 Survey of health facilities in PNG (survey conducted by this study)

1  
2  
3 **Figure 1. Three components of Donabedian approach of evaluating quality of care**  
4  
5  
6  
7  
8  
9  
10

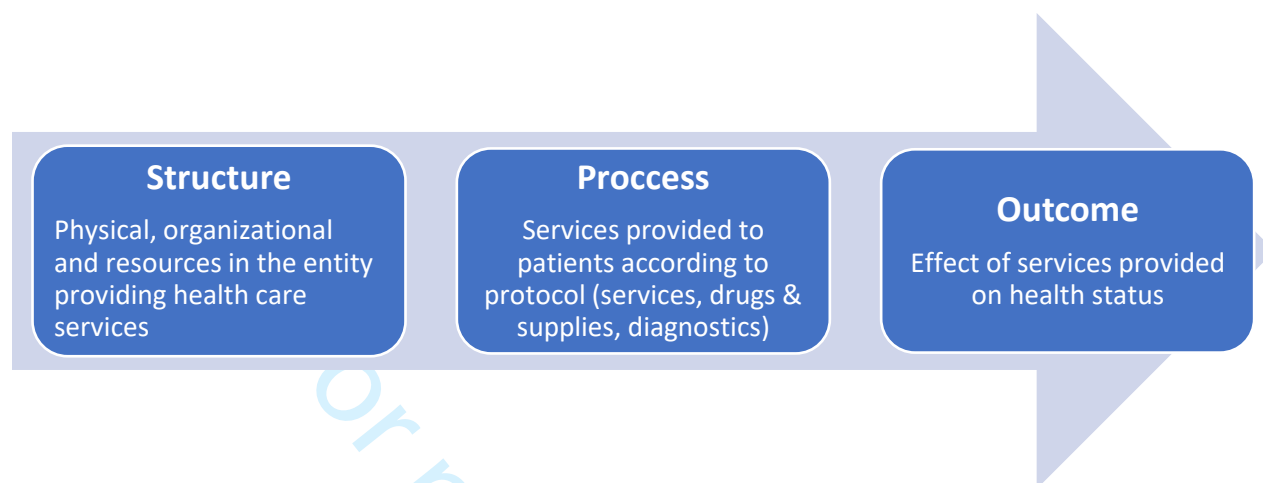

Source: Donabedian (2005)



1  
2  
3  
4  
5  
6  
7  
8  
9  
10  
11  
12  
13  
14  
15  
16  
17  
18  
19  
20  
21  
22  
23  
24  
25  
26  
27  
28  
29  
30  
31  
32  
33  
34  
35  
36  
37  
38  
39  
40  
41  
42  
43  
44  
45  
46  
47  
48  
49  
50  
51  
52  
53  
54  
55  
56  
57  
58  
59  
60

**Figure 2. Map of PNG with Districts Visited (green) and Location of Surveyed Facilities**

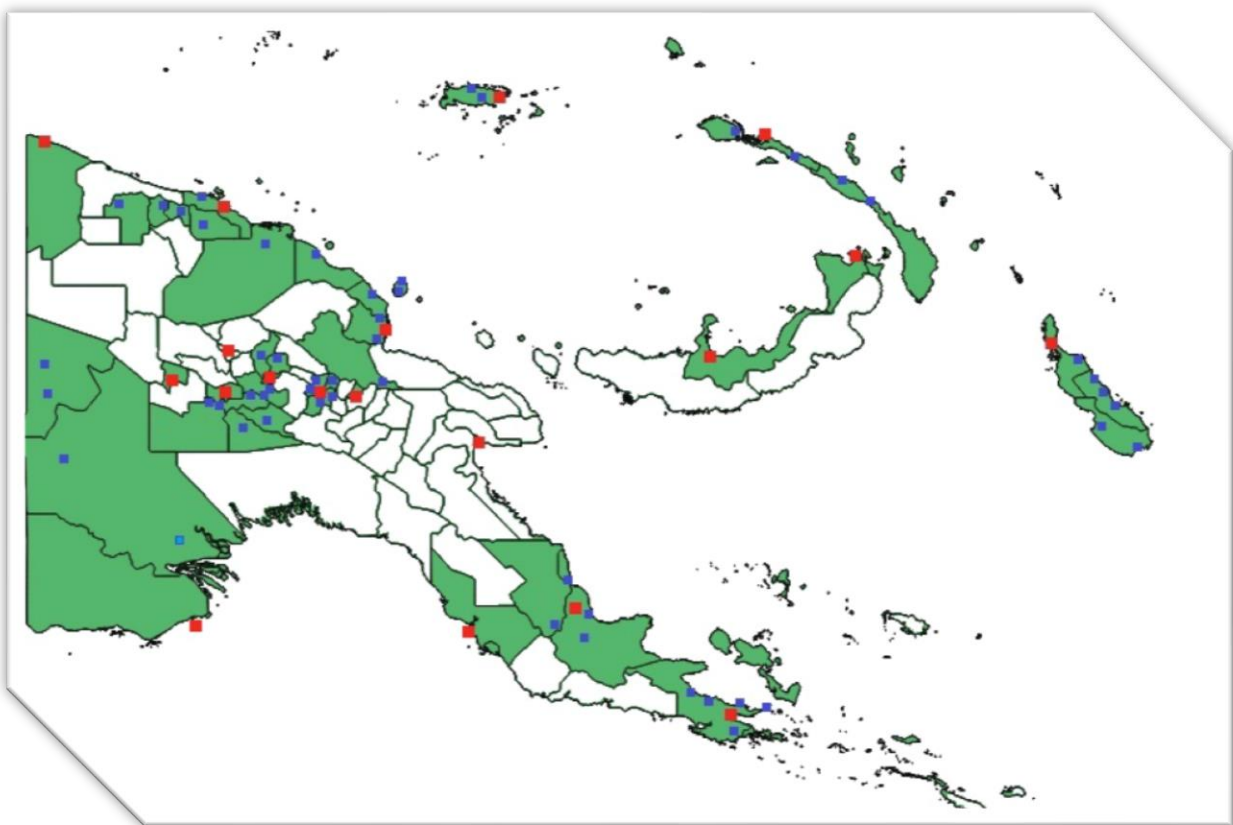

Note: Red squares represent the level 5 to 7 facilities while the blue squares represent the level 3 to 4 facilities surveyed.

1  
2  
3  
4  
5  
6  
7  
8  
9  
10  
11  
12  
13  
14  
15  
16  
17  
18  
19  
20  
21  
22  
23  
24  
25  
26  
27  
28  
29  
30  
31  
32  
33  
34  
35  
36  
37  
38  
39  
40  
41  
42  
43  
44  
45  
46  
47  
48  
49  
50  
51  
52  
53  
54  
55  
56  
57  
58  
59  
60

# Health Facility Efficiency Study in PNG with a Focus on Secondary Care

Health Facility Assessment 2014

Papua New Guinea Institute of Medical Research,  
PO Box 60 Goroka, Papua New Guinea;  
University of South Carolina, Columbia, South Carolina, USA;  
and Nossal Institute for Global Health, Melbourne, Australia.

## Face sheet for Health Facility Assessment

| IDENTIFICATION                                                                                                                                                                                                                                          |                                                                                                                                    |                                                                                                                                                                                                                                                                                                                                                                                                                                                                                                                                                             |                                                                                        |                                                                                                                                                                                              |  |  |  |  |  |  |  |  |  |  |  |  |  |  |
|---------------------------------------------------------------------------------------------------------------------------------------------------------------------------------------------------------------------------------------------------------|------------------------------------------------------------------------------------------------------------------------------------|-------------------------------------------------------------------------------------------------------------------------------------------------------------------------------------------------------------------------------------------------------------------------------------------------------------------------------------------------------------------------------------------------------------------------------------------------------------------------------------------------------------------------------------------------------------|----------------------------------------------------------------------------------------|----------------------------------------------------------------------------------------------------------------------------------------------------------------------------------------------|--|--|--|--|--|--|--|--|--|--|--|--|--|--|
| PROVINCE _____                                                                                                                                                                                                                                          | <table border="1" style="width: 100%; height: 20px;"> <tr><td style="width: 50%;"></td><td style="width: 50%;"></td></tr> </table> |                                                                                                                                                                                                                                                                                                                                                                                                                                                                                                                                                             |                                                                                        |                                                                                                                                                                                              |  |  |  |  |  |  |  |  |  |  |  |  |  |  |
|                                                                                                                                                                                                                                                         |                                                                                                                                    |                                                                                                                                                                                                                                                                                                                                                                                                                                                                                                                                                             |                                                                                        |                                                                                                                                                                                              |  |  |  |  |  |  |  |  |  |  |  |  |  |  |
| DISTRICT _____                                                                                                                                                                                                                                          | <table border="1" style="width: 100%; height: 20px;"> <tr><td style="width: 50%;"></td><td style="width: 50%;"></td></tr> </table> |                                                                                                                                                                                                                                                                                                                                                                                                                                                                                                                                                             |                                                                                        |                                                                                                                                                                                              |  |  |  |  |  |  |  |  |  |  |  |  |  |  |
|                                                                                                                                                                                                                                                         |                                                                                                                                    |                                                                                                                                                                                                                                                                                                                                                                                                                                                                                                                                                             |                                                                                        |                                                                                                                                                                                              |  |  |  |  |  |  |  |  |  |  |  |  |  |  |
| LOCAL LEVEL GOVERNMENT AREA _____                                                                                                                                                                                                                       | <table border="1" style="width: 100%; height: 20px;"> <tr><td style="width: 50%;"></td><td style="width: 50%;"></td></tr> </table> |                                                                                                                                                                                                                                                                                                                                                                                                                                                                                                                                                             |                                                                                        |                                                                                                                                                                                              |  |  |  |  |  |  |  |  |  |  |  |  |  |  |
|                                                                                                                                                                                                                                                         |                                                                                                                                    |                                                                                                                                                                                                                                                                                                                                                                                                                                                                                                                                                             |                                                                                        |                                                                                                                                                                                              |  |  |  |  |  |  |  |  |  |  |  |  |  |  |
| NAME AND TYPE/ID OF THE FACILITY _____<br>(HC=03, DLH =04, PH =05, RH=06, NH=07)                                                                                                                                                                        | <table border="1" style="width: 100%; height: 20px;"> <tr><td style="width: 50%;"></td><td style="width: 50%;"></td></tr> </table> |                                                                                                                                                                                                                                                                                                                                                                                                                                                                                                                                                             |                                                                                        |                                                                                                                                                                                              |  |  |  |  |  |  |  |  |  |  |  |  |  |  |
|                                                                                                                                                                                                                                                         |                                                                                                                                    |                                                                                                                                                                                                                                                                                                                                                                                                                                                                                                                                                             |                                                                                        |                                                                                                                                                                                              |  |  |  |  |  |  |  |  |  |  |  |  |  |  |
| OWNERSHIP OF THE FACILITY _____<br>(PUBLIC =01, CHURCH CATHOLIC =02, CHURCH LUTHERAN=03, CHURCH SDA =04)                                                                                                                                                | <table border="1" style="width: 100%; height: 20px;"> <tr><td style="width: 50%;"></td><td style="width: 50%;"></td></tr> </table> |                                                                                                                                                                                                                                                                                                                                                                                                                                                                                                                                                             |                                                                                        |                                                                                                                                                                                              |  |  |  |  |  |  |  |  |  |  |  |  |  |  |
|                                                                                                                                                                                                                                                         |                                                                                                                                    |                                                                                                                                                                                                                                                                                                                                                                                                                                                                                                                                                             |                                                                                        |                                                                                                                                                                                              |  |  |  |  |  |  |  |  |  |  |  |  |  |  |
| NAME AND DESIGNATION OF THE RESPONDENT _____<br>Consultant =01, OIC/Head Administrator = 02, Medical Officer =03, Dental Officer=04, Health Extension Officer =05, Nurse =06, Midwife=07, Community Health Worker =08, Other Allied Health worker = 09) | <table border="1" style="width: 100%; height: 20px;"> <tr><td style="width: 50%;"></td><td style="width: 50%;"></td></tr> </table> |                                                                                                                                                                                                                                                                                                                                                                                                                                                                                                                                                             |                                                                                        |                                                                                                                                                                                              |  |  |  |  |  |  |  |  |  |  |  |  |  |  |
|                                                                                                                                                                                                                                                         |                                                                                                                                    |                                                                                                                                                                                                                                                                                                                                                                                                                                                                                                                                                             |                                                                                        |                                                                                                                                                                                              |  |  |  |  |  |  |  |  |  |  |  |  |  |  |
| SEX OF THE RESPONDENT: MALE 1 FEMALE 2                                                                                                                                                                                                                  | <table border="1" style="width: 100%; height: 20px;"> <tr><td style="width: 50%;"></td><td style="width: 50%;"></td></tr> </table> |                                                                                                                                                                                                                                                                                                                                                                                                                                                                                                                                                             |                                                                                        |                                                                                                                                                                                              |  |  |  |  |  |  |  |  |  |  |  |  |  |  |
|                                                                                                                                                                                                                                                         |                                                                                                                                    |                                                                                                                                                                                                                                                                                                                                                                                                                                                                                                                                                             |                                                                                        |                                                                                                                                                                                              |  |  |  |  |  |  |  |  |  |  |  |  |  |  |
| Other persons interviewed for information :<br>Name:                                                                                                                                                                                                    | Designation (enter code in boxes from above):                                                                                      | <table border="1" style="width: 100%; height: 100px;"> <tr><td style="width: 50%;"></td><td style="width: 50%;"></td></tr> </table> |                                                                                        |                                                                                                                                                                                              |  |  |  |  |  |  |  |  |  |  |  |  |  |  |
|                                                                                                                                                                                                                                                         |                                                                                                                                    |                                                                                                                                                                                                                                                                                                                                                                                                                                                                                                                                                             |                                                                                        |                                                                                                                                                                                              |  |  |  |  |  |  |  |  |  |  |  |  |  |  |
|                                                                                                                                                                                                                                                         |                                                                                                                                    |                                                                                                                                                                                                                                                                                                                                                                                                                                                                                                                                                             |                                                                                        |                                                                                                                                                                                              |  |  |  |  |  |  |  |  |  |  |  |  |  |  |
|                                                                                                                                                                                                                                                         |                                                                                                                                    |                                                                                                                                                                                                                                                                                                                                                                                                                                                                                                                                                             |                                                                                        |                                                                                                                                                                                              |  |  |  |  |  |  |  |  |  |  |  |  |  |  |
|                                                                                                                                                                                                                                                         |                                                                                                                                    |                                                                                                                                                                                                                                                                                                                                                                                                                                                                                                                                                             |                                                                                        |                                                                                                                                                                                              |  |  |  |  |  |  |  |  |  |  |  |  |  |  |
|                                                                                                                                                                                                                                                         |                                                                                                                                    |                                                                                                                                                                                                                                                                                                                                                                                                                                                                                                                                                             |                                                                                        |                                                                                                                                                                                              |  |  |  |  |  |  |  |  |  |  |  |  |  |  |
|                                                                                                                                                                                                                                                         |                                                                                                                                    |                                                                                                                                                                                                                                                                                                                                                                                                                                                                                                                                                             |                                                                                        |                                                                                                                                                                                              |  |  |  |  |  |  |  |  |  |  |  |  |  |  |
|                                                                                                                                                                                                                                                         |                                                                                                                                    |                                                                                                                                                                                                                                                                                                                                                                                                                                                                                                                                                             |                                                                                        |                                                                                                                                                                                              |  |  |  |  |  |  |  |  |  |  |  |  |  |  |
| 1. _____                                                                                                                                                                                                                                                | 1. _____                                                                                                                           |                                                                                                                                                                                                                                                                                                                                                                                                                                                                                                                                                             |                                                                                        |                                                                                                                                                                                              |  |  |  |  |  |  |  |  |  |  |  |  |  |  |
| 2. _____                                                                                                                                                                                                                                                | 2. _____                                                                                                                           |                                                                                                                                                                                                                                                                                                                                                                                                                                                                                                                                                             |                                                                                        |                                                                                                                                                                                              |  |  |  |  |  |  |  |  |  |  |  |  |  |  |
| 3. _____                                                                                                                                                                                                                                                | 3. _____                                                                                                                           |                                                                                                                                                                                                                                                                                                                                                                                                                                                                                                                                                             |                                                                                        |                                                                                                                                                                                              |  |  |  |  |  |  |  |  |  |  |  |  |  |  |
| 4. _____                                                                                                                                                                                                                                                | 4. _____                                                                                                                           |                                                                                                                                                                                                                                                                                                                                                                                                                                                                                                                                                             |                                                                                        |                                                                                                                                                                                              |  |  |  |  |  |  |  |  |  |  |  |  |  |  |
| 5. _____                                                                                                                                                                                                                                                | 5. _____                                                                                                                           |                                                                                                                                                                                                                                                                                                                                                                                                                                                                                                                                                             |                                                                                        |                                                                                                                                                                                              |  |  |  |  |  |  |  |  |  |  |  |  |  |  |
| 6. _____                                                                                                                                                                                                                                                | 6. _____                                                                                                                           |                                                                                                                                                                                                                                                                                                                                                                                                                                                                                                                                                             |                                                                                        |                                                                                                                                                                                              |  |  |  |  |  |  |  |  |  |  |  |  |  |  |
| INTERVIEWER VISITS                                                                                                                                                                                                                                      |                                                                                                                                    |                                                                                                                                                                                                                                                                                                                                                                                                                                                                                                                                                             |                                                                                        |                                                                                                                                                                                              |  |  |  |  |  |  |  |  |  |  |  |  |  |  |
|                                                                                                                                                                                                                                                         | 1                                                                                                                                  | 2                                                                                                                                                                                                                                                                                                                                                                                                                                                                                                                                                           | 3                                                                                      | FINAL VISIT (DDMMYYYY)                                                                                                                                                                       |  |  |  |  |  |  |  |  |  |  |  |  |  |  |
| DATE                                                                                                                                                                                                                                                    |                                                                                                                                    |                                                                                                                                                                                                                                                                                                                                                                                                                                                                                                                                                             |                                                                                        | <table border="1" style="width: 100%; height: 20px;"> <tr><td style="width: 25%;"></td><td style="width: 25%;"></td><td style="width: 25%;"></td><td style="width: 25%;"></td></tr> </table> |  |  |  |  |  |  |  |  |  |  |  |  |  |  |
|                                                                                                                                                                                                                                                         |                                                                                                                                    |                                                                                                                                                                                                                                                                                                                                                                                                                                                                                                                                                             |                                                                                        |                                                                                                                                                                                              |  |  |  |  |  |  |  |  |  |  |  |  |  |  |
| INTERVIEWER'S NAME & CODE                                                                                                                                                                                                                               |                                                                                                                                    |                                                                                                                                                                                                                                                                                                                                                                                                                                                                                                                                                             |                                                                                        | CODE <table border="1" style="width: 40px; height: 20px; float: right;"></table>                                                                                                             |  |  |  |  |  |  |  |  |  |  |  |  |  |  |
| RESULT CODE*                                                                                                                                                                                                                                            |                                                                                                                                    |                                                                                                                                                                                                                                                                                                                                                                                                                                                                                                                                                             |                                                                                        | RESULT CODE <table border="1" style="width: 30px; height: 20px; float: right;"></table>                                                                                                      |  |  |  |  |  |  |  |  |  |  |  |  |  |  |
| *RESULT CODES:1: COMPLETED, 2: REFUSED, 3: PARTLY COMPLETED, 8: OTHER _____ (SPECIFY)                                                                                                                                                                   |                                                                                                                                    |                                                                                                                                                                                                                                                                                                                                                                                                                                                                                                                                                             |                                                                                        |                                                                                                                                                                                              |  |  |  |  |  |  |  |  |  |  |  |  |  |  |
| SUPERVISOR                                                                                                                                                                                                                                              | FIELD EDITOR                                                                                                                       | OFFICE EDITOR                                                                                                                                                                                                                                                                                                                                                                                                                                                                                                                                               | KEYED BY                                                                               |                                                                                                                                                                                              |  |  |  |  |  |  |  |  |  |  |  |  |  |  |
| NAME _____ <table border="1" style="width: 40px; height: 20px; float: right;"></table>                                                                                                                                                                  | NAME _____ <table border="1" style="width: 40px; height: 20px; float: right;"></table>                                             | NAME _____ <table border="1" style="width: 40px; height: 20px; float: right;"></table>                                                                                                                                                                                                                                                                                                                                                                                                                                                                      | NAME _____ <table border="1" style="width: 40px; height: 20px; float: right;"></table> |                                                                                                                                                                                              |  |  |  |  |  |  |  |  |  |  |  |  |  |  |
| DATE _____                                                                                                                                                                                                                                              | DATE _____                                                                                                                         | DATE _____                                                                                                                                                                                                                                                                                                                                                                                                                                                                                                                                                  | DATE _____                                                                             |                                                                                                                                                                                              |  |  |  |  |  |  |  |  |  |  |  |  |  |  |

Start time: Hour |\_\_|\_\_| Minute |\_\_|\_\_|

## Section 1. General information

| No  | Questions and Filters                                                                                                          | Coding categories                                                                                                                                                                                                                                                                                         | Response                 | Skip         |
|-----|--------------------------------------------------------------------------------------------------------------------------------|-----------------------------------------------------------------------------------------------------------------------------------------------------------------------------------------------------------------------------------------------------------------------------------------------------------|--------------------------|--------------|
| 101 | Name and position of the person interviewed for the survey (transfer information from cover page)                              | Interviewee name _____<br>Position _____                                                                                                                                                                                                                                                                  | <input type="text"/>     |              |
| 102 | Type of health facility (transfer information from cover page)                                                                 | HC.....03<br>DLH.....04<br>PH.....05<br>RH.....06<br>NH.....07<br>Other.....96                                                                                                                                                                                                                            | <input type="text"/>     |              |
| 103 | Ownership of the facility (transfer information from cover page)                                                               | Pubic.....1<br>Church Catholic.....2<br>Church Lutheran.....3<br>Church SDA.....4                                                                                                                                                                                                                         | <input type="checkbox"/> |              |
| 104 | Is there a signboard/sign with the facility name?                                                                              | Yes.....1<br>No.....2                                                                                                                                                                                                                                                                                     | <input type="checkbox"/> |              |
| 105 | Is this facility open 24 hours a day, seven days a week?                                                                       | Yes.....1<br>No.....2                                                                                                                                                                                                                                                                                     | <input type="checkbox"/> |              |
| 106 | The services available 24/7 from this facility<br><br>FOR EACH SERVICE, IF AVAILABLE 24 HOURS RECORD "1", OTHERWISE RECORD "2" | A. Inpatient hospital services<br>B. Emergency room services<br>C. Outpatient clinics for adults<br>D. Outpatient clinics for children<br>E. Outpatient clinics for women<br>F. Lab and Diagnostic Services<br>G. Pharmacy Services<br>H. Snake-bite clinic services<br>I. Other Services (specify) _____ |                          |              |
| 107 | How many days in a week the outpatient facility is open on weekdays?                                                           | Days                                                                                                                                                                                                                                                                                                      | <input type="checkbox"/> |              |
| 108 | Opening time on Weekdays (Mon-Fri)                                                                                             | Hour : Min                                                                                                                                                                                                                                                                                                | _ _  :  _ _              |              |
| 109 | Closing time on Weekdays (Mon-Fri)                                                                                             | Hour : Min                                                                                                                                                                                                                                                                                                | _ _  :  _ _              |              |
| 110 | Does this facility provide outpatient services on Saturdays and Sundays?                                                       | Only Saturdays.....1<br>Only Sundays.....2<br>Both Saturdays and Sundays.....3<br>Not open on weekends.....4                                                                                                                                                                                              | <input type="checkbox"/> | If 4<br>→113 |
| 111 | Opening time on Weekends                                                                                                       | Hour : Min                                                                                                                                                                                                                                                                                                | _ _  :  _ _              |              |
| 112 | Closing time on Weekends                                                                                                       | Hour : Min                                                                                                                                                                                                                                                                                                | _ _  :  _ _              |              |
| 113 | Is the facility is connected to electric supply grid?                                                                          | Yes.....1<br>No.....2                                                                                                                                                                                                                                                                                     | <input type="checkbox"/> | If 2<br>→117 |
| 114 | Is the electricity available 24 hours a day from the grid in a normal week?                                                    | Yes.....1<br>No.....2                                                                                                                                                                                                                                                                                     | <input type="checkbox"/> |              |
| 115 | Was electricity available through the grid all the time during the past one week?                                              | Yes.....1<br>No.....2                                                                                                                                                                                                                                                                                     | <input type="checkbox"/> |              |
| 116 | In last one week, how many hours the electricity was not available through the grid?                                           | Hours                                                                                                                                                                                                                                                                                                     | _ _ _                    |              |
| 117 | Does the facility have a functional back up or standby generator or electricity?                                               | Yes.....1<br>No.....2                                                                                                                                                                                                                                                                                     | <input type="checkbox"/> |              |

| No  | Questions and Filters                                                                                             | Coding categories                                                                                                                                    | Response                                                                                         | Skip         |
|-----|-------------------------------------------------------------------------------------------------------------------|------------------------------------------------------------------------------------------------------------------------------------------------------|--------------------------------------------------------------------------------------------------|--------------|
| 118 | Does the facility face problems with operating the backup system/generator due to lack of fuel in last one month? | Yes.....1<br>No .....2                                                                                                                               | <input type="checkbox"/>                                                                         |              |
| 119 | What is the health facility's <u>main</u> source of water now?                                                    | Piped.....1<br>Water tank (Water stored from supply).....2<br>Tube well.....3<br>Bore hole .....4<br>Protected well .....5<br>Others (Specify).....8 | <input type="checkbox"/>                                                                         |              |
| 120 | If water comes from supply line, how many hours the water is normally available in a day?                         | Hours                                                                                                                                                | <input type="text"/>                                                                             |              |
| 121 | In 2014, has water been available from this source all year?                                                      | Yes .....1<br>No .....2                                                                                                                              | <input type="checkbox"/>                                                                         |              |
| 122 | Are health workers able to use this water source today when treating patients?                                    | Yes .....1<br>No .....2                                                                                                                              | <input type="checkbox"/>                                                                         |              |
| 123 | Is the water supply connected to the delivery room and working today?                                             | Yes .....1<br>No .....2                                                                                                                              | <input type="checkbox"/>                                                                         |              |
| 124 | If there is a problem with the water supply (fixtures and lines), who is responsible for fixing it?               | Province.....1<br>District.....2<br>Church agency.....3<br>This facility.....4<br>Referral health facility .....5                                    | <input type="checkbox"/>                                                                         |              |
| 125 | How are expenses for fixing problems with the water supply met?                                                   | Request province.....1<br>Request district.....2<br>Own budget.....3<br>Referral health facility .....4                                              | <input type="checkbox"/>                                                                         |              |
| 126 | Do you think that the facility has adequate number of toilets?                                                    | Adequate.....1<br>Need few additional.....2<br>Not adequate at all.....3                                                                             | <input type="checkbox"/>                                                                         |              |
| 127 | Is there a private pharmacy within walking distance from this facility?                                           | Yes.....1<br>No .....2                                                                                                                               | <input type="checkbox"/>                                                                         |              |
| 128 | How many buildings are used to provide services in the facility?                                                  | Number of buildings                                                                                                                                  | <input type="text"/>                                                                             |              |
| 129 | Total land area of the facility                                                                                   | Land area in decimals                                                                                                                                | <input type="text"/>                                                                             |              |
| 130 | Construction materials used in the construction of the main building of the facility                              | Cement/brick.....1<br>Tin/other metals/tile.....2<br>Wood.....3<br>Leaves/other low-cost materials.....4<br>Others .....8                            | Roof <input type="checkbox"/><br>Wall <input type="checkbox"/><br>Floor <input type="checkbox"/> |              |
| 131 | Condition of the infrastructure                                                                                   | Most buildings/ building need major repairs.....1<br>In general, minor repairs needed.....2<br>Does not require much repairs.....3                   | <input type="checkbox"/>                                                                         |              |
| 132 | Is the land area around the health facility clean?                                                                | Yes.....1<br>No .....2                                                                                                                               | <input type="checkbox"/>                                                                         |              |
| 133 | Is the main building raised?                                                                                      | Yes.....1<br>No .....2                                                                                                                               | <input type="checkbox"/>                                                                         | If 2<br>→135 |
| 134 | How many meters the building is raised?                                                                           | Meters (MM.M)                                                                                                                                        | <input type="text"/>                                                                             |              |
| 135 | Are there living quarters on campus?                                                                              | Yes.....1<br>No .....2                                                                                                                               | <input type="checkbox"/>                                                                         | If 2<br>→137 |

| No  | Questions and Filters                                                                                                                         | Coding categories                                                                                                                                                                                                                                              | Response                                                                                                                                  | Skip         |
|-----|-----------------------------------------------------------------------------------------------------------------------------------------------|----------------------------------------------------------------------------------------------------------------------------------------------------------------------------------------------------------------------------------------------------------------|-------------------------------------------------------------------------------------------------------------------------------------------|--------------|
| 136 | How many families can live on campus (No. of separate quarters)                                                                               | If more than 98 families, enter 98.<br>Not known= 99                                                                                                                                                                                                           | <input type="text"/>                                                                                                                      |              |
| 137 | Does the facility have a blood bank?                                                                                                          | Yes.....1<br>No .....2                                                                                                                                                                                                                                         | <input type="checkbox"/>                                                                                                                  |              |
| 138 | Does the health unit have blood transfusion facility?                                                                                         | Yes.....1<br>No .....2                                                                                                                                                                                                                                         | <input type="checkbox"/>                                                                                                                  | If 2<br>→140 |
| 139 | Were there any blood transfusions done in the last one month?                                                                                 | Yes.....1<br>No .....2<br>Not applicable.....3                                                                                                                                                                                                                 | <input type="checkbox"/>                                                                                                                  |              |
| 140 | Does this facility have designated spaces for each of the doctors/key service providers to provide services after initial triage/examination? | Yes.....1<br>No .....2<br>Not applicable.....3                                                                                                                                                                                                                 | <input type="checkbox"/>                                                                                                                  |              |
| 141 | Is there an on-call room/space where health care professionals can rest during their on-call?                                                 | Yes.....1<br>No .....2<br>Not applicable.....3                                                                                                                                                                                                                 | <input type="checkbox"/>                                                                                                                  |              |
| 142 | Does this facility have working telephone or shortwave radio to call outside?                                                                 | Yes.....1<br>No .....2                                                                                                                                                                                                                                         | <input type="checkbox"/>                                                                                                                  |              |
| 143 | Does this facility have ambulances?                                                                                                           | Yes.....1<br>No .....2                                                                                                                                                                                                                                         | <input type="checkbox"/>                                                                                                                  | If 2<br>→147 |
| 144 | How many ambulances does the facility have?                                                                                                   | Number                                                                                                                                                                                                                                                         | <input type="text"/>                                                                                                                      |              |
| 145 | Was there any time this year when the ambulance was not in service?                                                                           | Yes.....1<br>No .....2                                                                                                                                                                                                                                         | <input type="checkbox"/>                                                                                                                  |              |
| 146 | If yes, how many ambulances remained out of service and for how long on average over the last one year?                                       | A. How many were out of service even temporarily?<br>B. Average weeks of out-of-service                                                                                                                                                                        | <input type="text"/><br><input type="text"/>                                                                                              |              |
| 147 | Does the facility have any other vehicles like cars, motorcycles etc.?                                                                        | Yes.....1<br>No .....2                                                                                                                                                                                                                                         | <input type="checkbox"/>                                                                                                                  | If 2<br>→201 |
| 148 | How many vehicles does the facility have?                                                                                                     | Car<br><br>Motorcycles                                                                                                                                                                                                                                         | <input type="text"/><br><input type="text"/>                                                                                              |              |
| 149 | Principal use of vehicles and ambulances in past seven days                                                                                   | Transporting patients to facility.....1<br>Transporting patients from village/local area to facility.....2<br>For use by health facility administrators.....3<br>For conducting outreach service.....4<br>Transporting healthcare providers to the facility..5 | Ambulance<br><input type="text"/><br>Cars<br><input type="text"/><br>Motorcycles<br><input type="text"/><br>Boats<br><input type="text"/> |              |
| 150 | Who meets the costs for maintenance / servicing of the vehicles?                                                                              | Province.....1<br>District.....2<br>Own budget.....3<br>Referral health facility .....4                                                                                                                                                                        | <input type="checkbox"/>                                                                                                                  |              |

## Section 2.1: Information on each of the buildings

| No  | Questions/ Items                                                            | Responses and codes                                                                                                                                                                                                   | Building/<br>Structure #1 | Building/<br>Structure #2 |
|-----|-----------------------------------------------------------------------------|-----------------------------------------------------------------------------------------------------------------------------------------------------------------------------------------------------------------------|---------------------------|---------------------------|
| 201 | Name of the structure/ building                                             |                                                                                                                                                                                                                       |                           |                           |
| 202 | Principal activities normally performed in the building/ structure          | Inpatient services.....1<br>Outpatient services.....2<br>Both inpatient and outpatient.....3<br>Lab/ diagnostic services.....4<br>Administrative offices.....5<br>Not used now.....6<br>Others _____.....8<br>Specify | <input type="checkbox"/>  | <input type="checkbox"/>  |
| 203 | Total floor space of the building                                           | Floor space in sq meters                                                                                                                                                                                              | <input type="text"/>      | <input type="text"/>      |
| 204 | Number of rooms in the structure (not including toilets, closets, hallways) | Number<br>Don't know: 998                                                                                                                                                                                             | <input type="text"/>      | <input type="text"/>      |
| 205 | Do windows and doors of the building need repairs?                          | No repairs needed .....1<br>Few repairs needed.....2<br>Many repairs needed.....3                                                                                                                                     | <input type="checkbox"/>  | <input type="checkbox"/>  |
| 206 | Do interior walls and roof of the building need repairs?                    | No repairs needed .....1<br>Few repairs needed.....2<br>Many repairs needed.....3                                                                                                                                     | <input type="checkbox"/>  | <input type="checkbox"/>  |
| 207 | Does electric supply system of the facility need repairs?                   | No repairs needed .....1<br>Few repairs needed.....2<br>Many repairs needed.....3                                                                                                                                     | <input type="checkbox"/>  | <input type="checkbox"/>  |
| 208 | Does water supply system of the facility need repair works?                 | No repairs needed .....1<br>Few repairs needed.....2<br>Many repairs needed.....3                                                                                                                                     | <input type="checkbox"/>  | <input type="checkbox"/>  |
| 209 | Does toilet (latrine) for clients' use of the facility need repair works?   | No repairs needed .....1<br>Few repairs needed.....2<br>Many repairs needed.....3<br>Not present.....4                                                                                                                | <input type="checkbox"/>  | <input type="checkbox"/>  |
| 210 | Number of toilets                                                           | Number<br>Don't know: 98                                                                                                                                                                                              | <input type="text"/>      | <input type="text"/>      |
| 211 | Are most of the toilets functional?                                         | Yes.....1<br>No .....2                                                                                                                                                                                                | <input type="checkbox"/>  | <input type="checkbox"/>  |
| 212 | Are the toilets clean?                                                      | Yes, all the toilets are clean.....1<br>Yes, most of the toilets are clean.....2<br>No, most are not clean.....3<br>No, all are unclean.....4                                                                         | <input type="checkbox"/>  | <input type="checkbox"/>  |
| 213 | How many rooms or areas in the building have water connection?              | Number<br>Don't know: 98                                                                                                                                                                                              | <input type="text"/>      | <input type="text"/>      |
| 214 | Are the water outlets are functional in toilet?                             | Yes.....1<br>No .....2                                                                                                                                                                                                | <input type="checkbox"/>  | <input type="checkbox"/>  |
| 215 | Floor space of waiting rooms/space for clients                              | Floor space in sq meters                                                                                                                                                                                              | <input type="text"/>      | <input type="text"/>      |
| 216 | How many seating spaces are there in waiting rooms/spaces?                  | Number<br>Don't know: 98                                                                                                                                                                                              | <input type="text"/>      | <input type="text"/>      |
| 217 | Are the waiting areas/rooms clean?                                          | Yes.....1<br>No .....2                                                                                                                                                                                                | <input type="checkbox"/>  | <input type="checkbox"/>  |
| 218 | Floor space of outpatient consultation (not including consultant's offices) | Floor space in sq meters                                                                                                                                                                                              | <input type="text"/>      | <input type="text"/>      |

| No  | Questions/ Items                                                                                                                        | Responses and codes       | Building/<br>Structure #1 | Building/<br>Structure #2 |
|-----|-----------------------------------------------------------------------------------------------------------------------------------------|---------------------------|---------------------------|---------------------------|
| 219 | Is there at least one site in the outpatient clinic area where both auditory and visual privacy can be maintained for client services?  | Yes.....1<br>No .....2    | <input type="checkbox"/>  | <input type="checkbox"/>  |
| 220 | Is the building is accessible to persons with disabilities (e.g., wheel chair ramps, elevators if more than one floor, hand rails etc.) | Yes.....1<br>No .....2    | <input type="checkbox"/>  | <input type="checkbox"/>  |
| 221 | Floor space in the emergency department including waiting space                                                                         | Floor space in sq meters  | _ _ _ _ _                 | _ _ _ _ _                 |
| 222 | Floor space for blood bank, blood donation space, etc.                                                                                  | Floor space in sq meters  | _ _ _ _ _                 | _ _ _ _ _                 |
| 223 | Number of observation beds in the building/ Structure (not including inpatient beds)                                                    | Number<br>Don't know: 998 | _ _ _ _                   | _ _ _ _                   |
| 224 | Number of inpatient wards in the building                                                                                               | Number<br>Don't know: 998 | _ _ _ _                   | _ _ _ _                   |
| 225 | Floor space of general adult wards                                                                                                      | Floor space in sq meters  | _ _ _ _ _                 | _ _ _ _ _                 |
| 226 | Number of inpatient beds in general adult wards (according to National Medical Standards)                                               | Number<br>Don't know: 998 | _ _ _ _                   | _ _ _ _                   |
| 227 | How many patients are in the general ward today?                                                                                        | Number<br>Don't know: 998 | _ _ _ _                   | _ _ _ _                   |
| 228 | Floor space of pediatric wards                                                                                                          | Floor space in sq meters  | _ _ _ _ _                 | _ _ _ _ _                 |
| 229 | Number of inpatient beds in pediatric wards                                                                                             | Number<br>Don't know: 998 | _ _ _ _                   | _ _ _ _                   |
| 230 | Number of beds in pediatric wards (according to National Medical Standards)                                                             | Number<br>Don't know: 998 | _ _ _ _                   | _ _ _ _                   |
| 231 | How many patients are in the pediatric ward today?                                                                                      | Number<br>Don't know: 998 | _ _ _ _                   | _ _ _ _                   |
| 232 | Floor space of surgery wards                                                                                                            | Floor space in sq meters  | _ _ _ _ _                 | _ _ _ _ _                 |
| 233 | Number of inpatient beds in surgery wards (according to National Medical Standards)                                                     | Number<br>Don't know: 998 | _ _ _ _                   | _ _ _ _                   |
| 234 | How many patients are in the surgery ward today?                                                                                        | Number<br>Don't know: 998 | _ _ _ _                   | _ _ _ _                   |
| 235 | Other wards (specify)<br>_____ ward                                                                                                     | Floor space in sq meters  | _ _ _ _ _                 | _ _ _ _ _                 |
| 236 | Number of inpatient beds in<br>_____ ward                                                                                               | Number<br>Don't know: 998 | _ _ _ _                   | _ _ _ _                   |
| 237 | How many patients are in the<br>_____ ward today?                                                                                       | Number<br>Don't know: 998 | _ _ _ _                   | _ _ _ _                   |
| 238 | Other wards (specify)<br>_____ ward                                                                                                     | Floor space in sq meters  | _ _ _ _ _                 | _ _ _ _ _                 |
| 239 | Number of inpatient beds in<br>_____ ward                                                                                               | Number<br>Don't know: 998 | _ _ _ _                   | _ _ _ _                   |
| 240 | How many patients are in the<br>_____ ward today?                                                                                       | Number<br>Don't know: 998 | _ _ _ _                   | _ _ _ _                   |



| No  | Questions/ Items                                                             | Responses and codes                                             | Building/<br>Structure #1 | Building/<br>Structure #2 |
|-----|------------------------------------------------------------------------------|-----------------------------------------------------------------|---------------------------|---------------------------|
| 241 | Condition of the mattresses on the beds?                                     | Good.....1<br>Not so good/not so bad.....2<br>Bad.....3         | <input type="checkbox"/>  | <input type="checkbox"/>  |
| 242 | Are there patients on floors in any of the wards or any other areas?         | Yes.....1<br>No .....2                                          | <input type="checkbox"/>  | <input type="checkbox"/>  |
| 243 | Are the inpatient areas clean?                                               | Yes.....1<br>No .....2                                          | <input type="checkbox"/>  | <input type="checkbox"/>  |
| 244 | Area of laboratory and diagnostic services including waiting areas           | Floor space in sq meters                                        | _ _ _ _ _ _ _             | _ _ _ _ _ _ _             |
| 245 | Are the lab/diagnostic services areas clean?                                 | Yes.....1<br>No .....2                                          | <input type="checkbox"/>  | <input type="checkbox"/>  |
| 246 | Area used for drug, supply and medical instrument storage                    | Floor space in sq meters                                        | _ _ _ _ _ _ _             | _ _ _ _ _ _ _             |
| 247 | Floor space in sq meters used for drug dispensing (if separate from storage) | Floor space in sq meters                                        | _ _ _ _ _ _ _             | _ _ _ _ _ _ _             |
| 248 | Floor space in sq meters of delivery rooms                                   | Floor space in sq meters                                        | _ _ _ _ _ _ _             | _ _ _ _ _ _ _             |
| 249 | How many delivery rooms are there in this building?                          | Number<br>Don't know: 998                                       | _ _ _ _ _ _ _             | _ _ _ _ _ _ _             |
| 250 | Are the delivery rooms equipped with delivery beds, lights, etc.?            | Yes.....1<br>No .....2                                          | <input type="checkbox"/>  | <input type="checkbox"/>  |
| 251 | Did the facility deliver babies in last seven days?                          | Yes.....1<br>No .....2                                          | <input type="checkbox"/>  | <input type="checkbox"/>  |
| 252 | Are the delivery rooms clean?                                                | Yes.....1<br>No .....2                                          | <input type="checkbox"/>  | <input type="checkbox"/>  |
| 253 | Floor space in sq meters of operation theaters                               | Floor space in sq meters                                        | _ _ _ _ _ _ _             | _ _ _ _ _ _ _             |
| 254 | How many operation theaters are there in the building?                       | Number<br>Don't know: 998                                       | _ _ _ _ _ _ _             | _ _ _ _ _ _ _             |
| 255 | Are the operation theaters functional and used regularly?                    | Yes.....1<br>No .....2                                          | <input type="checkbox"/>  | <input type="checkbox"/>  |
| 256 | Floor space in sq meters used by administrative personnel                    | Floor space in sq meters                                        | _ _ _ _ _ _ _             | _ _ _ _ _ _ _             |
| 257 | Floor space in sq meters used by laundry services                            | Floor space in sq meters                                        | _ _ _ _ _ _ _             | _ _ _ _ _ _ _             |
| 258 | Floor space in sq meters used by food services and kitchen                   | Floor space in sq meters                                        | _ _ _ _ _ _ _             | _ _ _ _ _ _ _             |
| 259 | Floor space in sq meters of cafeteria for employees and clients              | Floor space in sq meters                                        | _ _ _ _ _ _ _             | _ _ _ _ _ _ _             |
| 260 | Meeting and other common areas for the use of facility personnel             | Floor space in sq meters                                        | _ _ _ _ _ _ _             | _ _ _ _ _ _ _             |
| 261 | Floor space used by research projects/ NGOs and other external entities      | Floor space in sq meters<br>(EXCLUDE DIRECT PATIENT CARE AREAS) | _ _ _ _ _ _ _             | _ _ _ _ _ _ _             |
| 262 | Floor space in sq meters used by security personnel                          | Floor space in sq meters                                        | _ _ _ _ _ _ _             | _ _ _ _ _ _ _             |
| 263 | Floor space in sq meters used by mortuary                                    | Floor space in sq meters                                        | _ _ _ _ _ _ _             | _ _ _ _ _ _ _             |
| 264 | How many private rooms are there for inpatient stays?                        | Number of rooms<br>Don't know: 98                               | _ _ _ _ _ _ _             | _ _ _ _ _ _ _             |
| 265 | How many beds are there in the private rooms?                                | Number<br>Don't know: 998                                       | _ _ _ _ _ _ _             | _ _ _ _ _ _ _             |
| 266 | Floor space in sq meters used by private rooms                               | Floor space in sq meters                                        | _ _ _ _ _ _ _             | _ _ _ _ _ _ _             |

## Section 2: Information on each of the buildings (USE ADDITIONAL FORMS IF NEEDED)

| No  | Questions/ Items                                                            | Responses and codes                                                                                                                                                                                                   | Building/<br>Structure # _ _ | Building/<br>Structure # _ _ |
|-----|-----------------------------------------------------------------------------|-----------------------------------------------------------------------------------------------------------------------------------------------------------------------------------------------------------------------|------------------------------|------------------------------|
| 201 | Name of the structure/ building                                             |                                                                                                                                                                                                                       |                              |                              |
| 202 | Principal activities normally performed in the building/ structure          | Inpatient services.....1<br>Outpatient services.....2<br>Both inpatient and outpatient.....3<br>Lab/ diagnostic services.....4<br>Administrative offices.....5<br>Not used now.....6<br>Others _____.....8<br>Specify | <input type="checkbox"/>     | <input type="checkbox"/>     |
| 203 | Total floor space of the building                                           | Floor space in sq meters                                                                                                                                                                                              | _ _ _ _                      | _ _ _ _                      |
| 204 | Number of rooms in the structure (not including toilets, closets, hallways) | Number<br>Don't know: 998                                                                                                                                                                                             | _ _ _ _                      | _ _ _ _                      |
| 205 | Do windows and doors of the building need repairs?                          | No repairs needed .....1<br>Few repairs needed.....2<br>Many repairs needed.....3                                                                                                                                     | <input type="checkbox"/>     | <input type="checkbox"/>     |
| 206 | Do interior walls and roof of the building need repairs?                    | No repairs needed .....1<br>Few repairs needed.....2<br>Many repairs needed.....3                                                                                                                                     | <input type="checkbox"/>     | <input type="checkbox"/>     |
| 207 | Does electric supply system of the facility need repairs?                   | No repairs needed .....1<br>Few repairs needed.....2<br>Many repairs needed.....3                                                                                                                                     | <input type="checkbox"/>     | <input type="checkbox"/>     |
| 208 | Does water supply system of the facility need repair works?                 | No repairs needed .....1<br>Few repairs needed.....2<br>Many repairs needed.....3                                                                                                                                     | <input type="checkbox"/>     | <input type="checkbox"/>     |
| 209 | Does toilet (latrine) for clients' use of the facility need repair works?   | No repairs needed .....1<br>Few repairs needed.....2<br>Many repairs needed.....3<br>Not present.....4                                                                                                                | <input type="checkbox"/>     | <input type="checkbox"/>     |
| 210 | Number of toilets                                                           | Number<br>Don't know: 98                                                                                                                                                                                              | _ _                          | _ _                          |
| 211 | Are most of the toilets functional?                                         | Yes.....1<br>No .....2                                                                                                                                                                                                | <input type="checkbox"/>     | <input type="checkbox"/>     |
| 212 | Are the toilets clean?                                                      | Yes, all the toilets are clean.....1<br>Yes, most of the toilets are clean.....2<br>No, most are not clean.....3<br>No, all are unclean.....4                                                                         | <input type="checkbox"/>     | <input type="checkbox"/>     |
| 213 | How many rooms or areas in the building have water connection?              | Number<br>Don't know: 98                                                                                                                                                                                              | _ _ _ _                      | _ _ _ _                      |
| 214 | Are the water outlets are functional in toilet?                             | Yes.....1<br>No .....2                                                                                                                                                                                                | <input type="checkbox"/>     | <input type="checkbox"/>     |
| 215 | Floor space of waiting rooms/space for clients                              | Floor space in sq meters                                                                                                                                                                                              | _ _ _ _                      | _ _ _ _                      |
| 216 | How many seating spaces are there in waiting rooms/spaces?                  | Number<br>Don't know: 98                                                                                                                                                                                              | _ _ _ _                      | _ _ _ _                      |
| 217 | Are the waiting areas/rooms clean?                                          | Yes.....1<br>No .....2                                                                                                                                                                                                | <input type="checkbox"/>     | <input type="checkbox"/>     |
| 218 | Floor space of outpatient consultation (not including consultant's offices) | Floor space in sq meters                                                                                                                                                                                              | _ _ _ _                      | _ _ _ _                      |

| No  | Questions/ Items                                                                                                                        | Responses and codes       | Building/<br>Structure # _ _ | Building/<br>Structure # _ _ |
|-----|-----------------------------------------------------------------------------------------------------------------------------------------|---------------------------|------------------------------|------------------------------|
| 219 | Is there at least one site in the outpatient clinic area where both auditory and visual privacy can be maintained for client services?  | Yes.....1<br>No .....2    | <input type="checkbox"/>     | <input type="checkbox"/>     |
| 220 | Is the building is accessible to persons with disabilities (e.g., wheel chair ramps, elevators if more than one floor, hand rails etc.) | Yes.....1<br>No .....2    | <input type="checkbox"/>     | <input type="checkbox"/>     |
| 221 | Floor space in the emergency department including waiting space                                                                         | Floor space in sq meters  | _ _ _ _                      | _ _ _ _                      |
| 222 | Floor space for blood bank, blood donation space, etc.                                                                                  | Floor space in sq meters  | _ _ _ _                      | _ _ _ _                      |
| 223 | Number of observation beds in the building/ Structure (not including inpatient beds)                                                    | Number<br>Don't know: 998 | _ _ _                        | _ _ _                        |
| 224 | Number of inpatient wards in the building                                                                                               | Number<br>Don't know: 998 | _ _ _                        | _ _ _                        |
| 225 | Floor space of general adult wards                                                                                                      | Floor space in sq meters  | _ _ _ _                      | _ _ _ _                      |
| 226 | Number of inpatient beds in general adult wards (according to National Medical Standards)                                               | Number<br>Don't know: 998 | _ _ _                        | _ _ _                        |
| 227 | How many patients are in the general ward today?                                                                                        | Number<br>Don't know: 998 | _ _ _                        | _ _ _                        |
| 228 | Floor space of pediatric wards                                                                                                          | Floor space in sq meters  | _ _ _ _                      | _ _ _ _                      |
| 229 | Number of inpatient beds in pediatric wards                                                                                             | Number<br>Don't know: 998 | _ _ _                        | _ _ _                        |
| 230 | Number of beds in pediatric wards (according to National Medical Standards)                                                             | Number<br>Don't know: 998 | _ _ _                        | _ _ _                        |
| 231 | How many patients are in the pediatric ward today?                                                                                      | Number<br>Don't know: 998 | _ _ _                        | _ _ _                        |
| 232 | Floor space of surgery wards                                                                                                            | Floor space in sq meters  | _ _ _ _                      | _ _ _ _                      |
| 233 | Number of inpatient beds in surgery wards (according to National Medical Standards)                                                     | Number<br>Don't know: 998 | _ _ _                        | _ _ _                        |
| 234 | How many patients are in the surgery ward today?                                                                                        | Number<br>Don't know: 998 | _ _ _                        | _ _ _                        |
| 235 | Other wards (specify)<br>_____ ward                                                                                                     | Floor space in sq meters  | _ _ _ _                      | _ _ _ _                      |
| 236 | Number of inpatient beds in<br>_____ ward                                                                                               | Number<br>Don't know: 998 | _ _ _                        | _ _ _                        |
| 237 | How many patients are in the<br>_____ ward today?                                                                                       | Number<br>Don't know: 998 | _ _ _                        | _ _ _                        |
| 238 | Other wards (specify)<br>_____ ward                                                                                                     | Floor space in sq meters  | _ _ _ _                      | _ _ _ _                      |
| 239 | Number of inpatient beds in<br>_____ ward                                                                                               | Number<br>Don't know: 998 | _ _ _                        | _ _ _                        |
| 240 | How many patients are in the<br>_____ ward today?                                                                                       | Number<br>Don't know: 998 | _ _ _                        | _ _ _                        |

| No  | Questions/ Items                                                             | Responses and codes                                             | Building/<br>Structure # _ _ | Building/<br>Structure # _ _ |
|-----|------------------------------------------------------------------------------|-----------------------------------------------------------------|------------------------------|------------------------------|
| 241 | Condition of the mattresses on the beds?                                     | Good.....1<br>Not so good/not so bad.....2<br>Bad.....3         | <input type="checkbox"/>     | <input type="checkbox"/>     |
| 242 | Are there patients on floors in any of the wards or any other areas?         | Yes.....1<br>No .....2                                          | <input type="checkbox"/>     | <input type="checkbox"/>     |
| 243 | Are the inpatient areas clean?                                               | Yes.....1<br>No .....2                                          | <input type="checkbox"/>     | <input type="checkbox"/>     |
| 244 | Area of laboratory and diagnostic services including waiting areas           | Floor space in sq meters                                        | _ _ _ _ _                    | _ _ _ _ _                    |
| 245 | Are the lab/diagnostic services areas clean?                                 | Yes.....1<br>No .....2                                          | <input type="checkbox"/>     | <input type="checkbox"/>     |
| 246 | Area used for drug, supply and medical instrument storage                    | Floor space in sq meters                                        | _ _ _ _ _                    | _ _ _ _ _                    |
| 247 | Floor space in sq meters used for drug dispensing (if separate from storage) | Floor space in sq meters                                        | _ _ _ _ _                    | _ _ _ _ _                    |
| 248 | Floor space in sq meters of delivery rooms                                   | Floor space in sq meters                                        | _ _ _ _ _                    | _ _ _ _ _                    |
| 249 | How many delivery rooms are there in this building?                          | Number<br>Don't know: 998                                       | _ _ _ _                      | _ _ _ _                      |
| 250 | Are the delivery rooms equipped with delivery beds, lights, etc.?            | Yes.....1<br>No .....2                                          | <input type="checkbox"/>     | <input type="checkbox"/>     |
| 251 | Did the facility deliver babies in last seven days?                          | Yes.....1<br>No .....2                                          | <input type="checkbox"/>     | <input type="checkbox"/>     |
| 252 | Are the delivery rooms clean?                                                | Yes.....1<br>No .....2                                          | <input type="checkbox"/>     | <input type="checkbox"/>     |
| 253 | Floor space in sq meters of operation theaters                               | Floor space in sq meters                                        | _ _ _ _ _                    | _ _ _ _ _                    |
| 254 | How many operation theaters are there in the building?                       | Number<br>Don't know: 998                                       | _ _ _ _                      | _ _ _ _                      |
| 255 | Are the operation theaters functional and used regularly?                    | Yes.....1<br>No .....2                                          | <input type="checkbox"/>     | <input type="checkbox"/>     |
| 256 | Floor space in sq meters used by administrative personnel                    | Floor space in sq meters                                        | _ _ _ _ _                    | _ _ _ _ _                    |
| 257 | Floor space in sq meters used by laundry services                            | Floor space in sq meters                                        | _ _ _ _ _                    | _ _ _ _ _                    |
| 258 | Floor space in sq meters used by food services and kitchen                   | Floor space in sq meters                                        | _ _ _ _ _                    | _ _ _ _ _                    |
| 259 | Floor space in sq meters of cafeteria for employees and clients              | Floor space in sq meters                                        | _ _ _ _ _                    | _ _ _ _ _                    |
| 260 | Meeting and other common areas for the use of facility personnel             | Floor space in sq meters                                        | _ _ _ _ _                    | _ _ _ _ _                    |
| 261 | Floor space used by research projects/ NGOs and other external entities      | Floor space in sq meters<br>(EXCLUDE DIRECT PATIENT CARE AREAS) | _ _ _ _ _                    | _ _ _ _ _                    |
| 262 | Floor space in sq meters used by security personnel                          | Floor space in sq meters                                        | _ _ _ _ _                    | _ _ _ _ _                    |
| 263 | Floor space in sq meters used by mortuary                                    | Floor space in sq meters                                        | _ _ _ _ _                    | _ _ _ _ _                    |
| 264 | How many private rooms are there for inpatient stays?                        | Number of rooms<br>Don't know: 98                               | _ _ _ _                      | _ _ _ _                      |
| 265 | How many beds are there in the private rooms?                                | Number<br>Don't know: 998                                       | _ _ _ _                      | _ _ _ _                      |
| 266 | Floor space in sq meters used by private rooms                               | Floor space in sq meters                                        | _ _ _ _ _                    | _ _ _ _ _                    |

## Section 3: Communications between this health facility and a referral facility

| No  | Questions and Filters                                                                                                 | Coding categories                                                                                                                                                                                  | Response                                                             | Skip |
|-----|-----------------------------------------------------------------------------------------------------------------------|----------------------------------------------------------------------------------------------------------------------------------------------------------------------------------------------------|----------------------------------------------------------------------|------|
| 301 | How far is the closest referral facility from this facility?                                                          | Kilometers<br>Don't know..... 998<br>Not applicable..... 999                                                                                                                                       | <input type="text"/>                                                 |      |
| 302 | What type of facility is that (the referral facility)?                                                                | NH..... 1<br>RH..... 2<br>PH..... 3<br>DH..... 4<br>Other..... 9                                                                                                                                   | <input type="checkbox"/>                                             |      |
| 303 | On the average, how many patients are referred to other facilities in a month from this facility?                     | Number of patients referred<br>Don't know..... 998                                                                                                                                                 | <input type="text"/>                                                 |      |
| 304 | How long does it take to transfer sick patients to the referral hospital if transported by ambulance (hours and days) | Hours and/or days                                                                                                                                                                                  | <input type="text"/> hours<br><input type="text"/> days              |      |
| 305 | What is the average cost per trip for the patients, please specify                                                    | A. Travel person: _____ PNG kina<br>B. Accommodation per person: _____ PNG kina<br>C. Per diem per person _____ PNG kina                                                                           | <input type="text"/><br><input type="text"/><br><input type="text"/> |      |
| 306 | Do you budget specifically for patient transfers?                                                                     | Yes..... 1<br>No..... 2                                                                                                                                                                            | <input type="checkbox"/>                                             |      |
| 307 | Were the referred patients treated at the referral facility?                                                          | Yes..... 1<br>No..... 2<br>Some, but not all..... 3<br>Don't know..... 8                                                                                                                           | <input type="checkbox"/>                                             |      |
| 308 | Did the referral facilities refer some of the referred patients to another facility?                                  | Yes..... 1<br>No..... 2<br>Don't know..... 8                                                                                                                                                       | <input type="checkbox"/>                                             |      |
| 309 | What is the mode of communication between this facility and the usual referral center?                                | No formal communication system..... 1<br>Only discharge card..... 2<br>Telephone or mobile phone..... 3<br>Two Way Radio..... 4<br>Other means..... 9<br>(specify)                                 | <input type="checkbox"/>                                             |      |
| 310 | What is the most common form of transport when referring patients?                                                    | Using the facility's ambulance/vehicle..... 1<br>Using commercially available cars..... 2<br>Using vans..... 3<br>Using boats..... 4<br>Plane/helicopter..... 5<br>Other means..... 9<br>(specify) | <input type="checkbox"/>                                             |      |
| 311 | Does a health worker travel with a sick patient to the referral hospital?                                             | Yes..... 1<br>No..... 2                                                                                                                                                                            | <input type="checkbox"/>                                             |      |
| 312 | Does the referral hospital have to verbally confirm they will accept the patient before they can be transferred?      | Yes..... 1<br>No..... 2                                                                                                                                                                            | <input type="checkbox"/>                                             |      |

## Section 4: Repair and Medical Waste Management

| No  | Questions and Filters                                                                                                 | Coding categories                                                                                                                                                                                                                                                                  | Response                 | Skip         |
|-----|-----------------------------------------------------------------------------------------------------------------------|------------------------------------------------------------------------------------------------------------------------------------------------------------------------------------------------------------------------------------------------------------------------------------|--------------------------|--------------|
| 401 | Who should be responsible for ensuring infrastructure maintenance is carried out?                                     | Province.....1<br>District.....2<br>Church agency.....3<br>This facility.....4<br>Referral health facility .....5                                                                                                                                                                  | <input type="checkbox"/> |              |
| 402 | Is it desirable for other maintenance (i.e. anything other than really simple tasks) being managed at a higher level? | Yes .....1<br>No .....2                                                                                                                                                                                                                                                            | <input type="checkbox"/> | If 2<br>→404 |
| 403 | If yes, by who?                                                                                                       | Province.....1<br>District.....2<br>Church agency.....3<br>This facility.....4<br>Referral health facility .....5                                                                                                                                                                  | <input type="checkbox"/> |              |
| 404 | Who should be responsible for ensuring basic utilities are maintained at the health facility?                         | Province.....1<br>District.....2<br>Church agency.....3<br>This facility.....4<br>Referral health facility .....5                                                                                                                                                                  | <input type="checkbox"/> |              |
| 405 | Comments on repair needs or types of repair problems of the facility:                                                 |                                                                                                                                                                                                                                                                                    |                          |              |
|     | <b>Medical waste treatment</b> Verify use if incinerator use log is available                                         |                                                                                                                                                                                                                                                                                    |                          |              |
| 406 | Is there any incinerator (high temperature) available in the facility?                                                | Available and used.....1<br>Available but not used .....2<br>Not available.....3                                                                                                                                                                                                   | <input type="checkbox"/> |              |
| 407 | Is there any incinerator (1 chamber drum/brick) available in the facility?                                            | Available and used.....1<br>Available but not used .....2<br>Not available.....3                                                                                                                                                                                                   | <input type="checkbox"/> |              |
| 408 | Is there any burial pit for waste available in the facility?                                                          | Available and used.....1<br>Available but not used .....2<br>Not available.....3                                                                                                                                                                                                   | <input type="checkbox"/> |              |
| 409 | Is there any system of segregating medical wastes into three colored waste baskets available in the facility?         | Available and used.....1<br>Available but not used .....2<br>Not available.....3                                                                                                                                                                                                   | <input type="checkbox"/> |              |
| 410 | Disposal practice of sharps (needles, glass, surgical instruments, etc.)                                              | Incinerator .....1<br>Burn and bury.....2<br>Bury but do not burn.....3<br>Burn but do not bury.....4<br>Put in a covered pit (could be latrine).....5<br>Put in an open pit .....6<br>Store, collect and move offsite .....7<br>Just throw out in the open .....8<br>Other .....9 | <input type="checkbox"/> |              |
| 411 | Disposal practice of biomedical wastes (placenta, human body parts, laboratory waste, etc.)                           | Incinerator .....1<br>Burn and bury.....2<br>Bury but do not burn.....3<br>Burn but do not bury.....4<br>Put in a covered pit (could be latrine).....5<br>Put in an open pit .....6<br>Store, collect and move offsite .....7<br>Just throw out in the open .....8<br>Other .....9 | <input type="checkbox"/> |              |

## Section 5: Food Services and Kitchen Area

| Food Services and availability |                                                                                                                        |                                                                                                                       |                          |               |
|--------------------------------|------------------------------------------------------------------------------------------------------------------------|-----------------------------------------------------------------------------------------------------------------------|--------------------------|---------------|
| No                             | Questions and Filters                                                                                                  | Coding categories                                                                                                     | Response                 | Skip          |
| 501                            | Do you provide food service to inpatients?                                                                             | Yes.....1<br>No.....2                                                                                                 | <input type="checkbox"/> | If 2<br>→ 601 |
| 502                            | Do you charge inpatients any money for food?                                                                           | Yes .....1<br>No .....2                                                                                               | <input type="checkbox"/> |               |
| 503                            | How much do you charge for food per person per day?                                                                    | PGKina.<br>(000 if patients are not charged)                                                                          | _ _ _ _                  |               |
| 504                            | What is the cost of food per person per day?                                                                           | PGKina                                                                                                                | _ _ _ _                  |               |
| 505                            | Number of patients who were served with food yesterday?                                                                | Number of patients#                                                                                                   | _ _ _ _                  |               |
| 506                            | Is there a protocol for feeding hospitalized infants (<1 year)?                                                        | Yes.....1<br>No.....2                                                                                                 | <input type="checkbox"/> |               |
| 507                            | How many meals are typically provided for infants in 24 hours?                                                         | Two to three times.....1<br>Four to five times.....2<br>Six times or more.....3                                       | <input type="checkbox"/> |               |
| 508                            | Is the budget allocated for food service enough for buying groceries and other needs for all patients in the facility? | Yes .....1<br>No.....2                                                                                                | <input type="checkbox"/> |               |
| 509                            | Does the facility contract out food services?                                                                          | Yes, only grocery procurement contracted out.....1<br>Yes, cooking +other food services contracted out..2<br>No.....3 | <input type="checkbox"/> |               |
| 510                            | Is the food prepared on-site or prepared outside the facility?                                                         | Prepared in the facility .....1<br>Not prepared in the facility.....2                                                 | <input type="checkbox"/> | If 2<br>→ 601 |
| 511                            | Is there a chimney or working exhaust fan in cooking area?                                                             | Yes .....1<br>No.....2                                                                                                | <input type="checkbox"/> |               |
| 512                            | Is soap/detergent present in cooking area for washing hands?                                                           | Yes .....1<br>No.....2                                                                                                | <input type="checkbox"/> |               |
| 513                            | Is soap/detergent present for washing pots, pans, plates, utensils                                                     | Yes .....1<br>No.....2                                                                                                | <input type="checkbox"/> |               |
| 514                            | Is the kitchen floor clean (no garbage on floor)?                                                                      | Yes .....1<br>No.....2                                                                                                | <input type="checkbox"/> |               |
| 515                            | Is the wiping cloth used in the kitchen is clean, not smelly?                                                          | Yes .....1<br>No.....2                                                                                                | <input type="checkbox"/> |               |
| 516                            | Are there signs of cockroach/mice infestation in the kitchen area?                                                     | Yes .....1<br>No.....2                                                                                                | <input type="checkbox"/> |               |
| 517                            | Do cooking personnel tie hair back and/or wear caps?                                                                   | Yes .....1<br>No.....2                                                                                                | <input type="checkbox"/> |               |
| 518                            | Do cooks wear gloves while handling food?                                                                              | Yes .....1<br>No.....2                                                                                                | <input type="checkbox"/> |               |
| 519                            | Are prepared foods covered?                                                                                            | Yes .....1<br>No.....2                                                                                                | <input type="checkbox"/> |               |



**Section 6: Services and other supplies**  
**Section 6.1: Maternal and neonatal care: Antenatal care**

|                                                                                                                                                                               | Questions and Filters                                                                                                          | Coding categories                                                                                                   | Response                 | Skip       |
|-------------------------------------------------------------------------------------------------------------------------------------------------------------------------------|--------------------------------------------------------------------------------------------------------------------------------|---------------------------------------------------------------------------------------------------------------------|--------------------------|------------|
| 601                                                                                                                                                                           | Are Antenatal services provided at this facility?                                                                              | Yes.....1<br>No.....2                                                                                               | <input type="checkbox"/> | If 2 → 604 |
| 602                                                                                                                                                                           | How many days in a week the facility provide ANC?                                                                              | #Days in a week                                                                                                     | <input type="text"/>     |            |
| 603                                                                                                                                                                           | Number of antenatal outreach clinics held in the last 3 months?                                                                | Number of outreach clinics held<br>Don't know.....998                                                               | <input type="text"/>     |            |
| <b>Antenatal clinic equipment and supplies:</b> check to see whether the following items are present and functional in or near the area where antenatal services are provided |                                                                                                                                |                                                                                                                     |                          |            |
| 604                                                                                                                                                                           | Fetal stethoscope (or foetal monitor)                                                                                          | A. Number<br>B. Number Working<br>C. Number regularly used                                                          | <input type="text"/>     |            |
| 605                                                                                                                                                                           | Stethoscope and blood pressure cuff                                                                                            | A. Number<br>B. Number Working<br>C. Number regularly used                                                          | <input type="text"/>     |            |
| 606                                                                                                                                                                           | Tape measure                                                                                                                   | A. Number<br>B. Number Working<br>C. Number regularly used                                                          | <input type="text"/>     |            |
| 607                                                                                                                                                                           | Scale                                                                                                                          | A. Number<br>B. Number Working<br>C. Number regularly used                                                          | <input type="text"/>     |            |
| 608                                                                                                                                                                           | Ultrasound Machine (and gel)                                                                                                   | A. Number<br>B. Number Working<br>C. Number regularly used                                                          | <input type="text"/>     |            |
| <b>MATERNAL AND NEONATAL CARE: Deliveries.</b>                                                                                                                                |                                                                                                                                |                                                                                                                     |                          |            |
| <i>Ask the in charge to assist you with questions in this section.</i>                                                                                                        |                                                                                                                                |                                                                                                                     |                          |            |
| 609                                                                                                                                                                           | Does the facility staff assist with deliveries, either in the facility or in the community?                                    | Yes ..... 1<br>No.....2                                                                                             | <input type="checkbox"/> | If 2 → 611 |
| 610                                                                                                                                                                           | Does the facility staff assist with deliveries only in the facility, only in the community, or in both facility and community? | Only in facility ..... 1<br>Only in community.....2<br>Both in facility and community.....3                         | <input type="checkbox"/> |            |
| 611                                                                                                                                                                           | Does this facility have the capacity to administer antibiotics, oxytocics, and anticonvulsants for delivery of babies?         | Yes, can do all of the three .....1<br>Can do two of the three .....2<br>Can do one of the three .....3<br>No.....4 | <input type="checkbox"/> |            |
| 612                                                                                                                                                                           | Does this facility have the ability/capacity for manual removal of the placenta?                                               | Yes, can do now ..... 1<br>Usually, but nit now ..... 2<br>Does not have the capacity ..... 3                       | <input type="checkbox"/> |            |
| 613                                                                                                                                                                           | Does this facility have the capacity to remove retained products following miscarriage or abortion?                            | Yes, can do now ..... 1<br>Usually, but not now ..... 2<br>Does not have the capacity ..... 3                       | <input type="checkbox"/> |            |
| 614                                                                                                                                                                           | Does this facility have the capacity to do assisted vaginal delivery, preferably with vacuum extractor?                        | Yes, can do now ..... 1<br>Usually, but not now ..... 2<br>Does not have the capacity ..... 3                       | <input type="checkbox"/> |            |
| 615                                                                                                                                                                           | Does the facility have the capacity to provide newborn care?                                                                   | Yes, can do now ..... 1<br>Usually, but not now ..... 2<br>Does not have the capacity ..... 3                       | <input type="checkbox"/> |            |
| 616                                                                                                                                                                           | Does the facility have the capacity to manage caesarean section?                                                               | Yes, can do now ..... 1<br>Usually, but not now ..... 2<br>Does not have the capacity ..... 3                       | <input type="checkbox"/> |            |



|                       |                                                                                                                                      |                                                                                                                                          |                                                                                            |                                                                                  |  |
|-----------------------|--------------------------------------------------------------------------------------------------------------------------------------|------------------------------------------------------------------------------------------------------------------------------------------|--------------------------------------------------------------------------------------------|----------------------------------------------------------------------------------|--|
| 1<br>2<br>3<br>4<br>5 | 617                                                                                                                                  | Does the facility have the capacity to do safe blood transfusion?                                                                        | Yes, can do now .....1<br>Usually, but not now .....2<br>Does not have the capacity .....3 | <input type="checkbox"/>                                                         |  |
| 6<br>7<br>8           | 618                                                                                                                                  | Does the facility have the capacity to administer anesthesia?                                                                            | Yes, can do now .....1<br>Usually, but not now .....2<br>Does not have the capacity .....3 | <input type="checkbox"/>                                                         |  |
| 9<br>10<br>11         | 619                                                                                                                                  | Does the facility have the capacity to care for sick and low-birth weight newborns, including resuscitation?                             | Yes, can do now .....1<br>Usually, but not now .....2<br>Does not have the capacity .....3 | <input type="checkbox"/>                                                         |  |
| 12<br>13<br>14<br>15  | 620                                                                                                                                  | Does the facility have at least two skilled attendants covering 24 hours a day and seven days a week, assisted by trained support staff? | Yes .....1<br>No .....2                                                                    | <input type="checkbox"/>                                                         |  |
| 16                    | <b>MATERNAL AND NEONATAL CARE: Delivery room equipment and supplies</b>                                                              |                                                                                                                                          |                                                                                            |                                                                                  |  |
| 17                    | <i>Check to see whether the following items are present and functional in or near the delivery room.</i>                             |                                                                                                                                          |                                                                                            |                                                                                  |  |
| 18<br>19<br>20        | 621                                                                                                                                  | Delivery kit (instruments, supplies)                                                                                                     | Present and complete ..... 1<br>Present but not complete ..... 2<br>Not present .....3     | <input type="checkbox"/>                                                         |  |
| 21                    | <i>check to see whether the following items are present and functional in or near the area where antenatal services are provided</i> |                                                                                                                                          |                                                                                            |                                                                                  |  |
| 22<br>23<br>24<br>25  | 622                                                                                                                                  | Stethoscope                                                                                                                              | A. Number<br>B. Number Working<br>C. Number regularly used                                 | <input type="checkbox"/><br><input type="checkbox"/><br><input type="checkbox"/> |  |
| 26<br>27<br>28        | 623                                                                                                                                  | Partograph                                                                                                                               | A. Number<br>B. Number Working<br>C. Number regularly used                                 | <input type="checkbox"/><br><input type="checkbox"/><br><input type="checkbox"/> |  |
| 29<br>30<br>31        | 624                                                                                                                                  | Pelvic procedure instruments like speculum                                                                                               | A. Number<br>B. Number Working<br>C. Number regularly used                                 | <input type="checkbox"/><br><input type="checkbox"/><br><input type="checkbox"/> |  |
| 32<br>33<br>34        | 625                                                                                                                                  | Delivery light                                                                                                                           | A. Number<br>B. Number Working<br>C. Number regularly used                                 | <input type="checkbox"/><br><input type="checkbox"/><br><input type="checkbox"/> |  |
| 35<br>36<br>37        | 626                                                                                                                                  | Sterilizer                                                                                                                               | A. Number<br>B. Number Working<br>C. Number regularly used                                 | <input type="checkbox"/><br><input type="checkbox"/><br><input type="checkbox"/> |  |
| 38<br>39<br>40        | 627                                                                                                                                  | Vacuum extractor                                                                                                                         | A. Number<br>B. Number Working<br>C. Number regularly used                                 | <input type="checkbox"/><br><input type="checkbox"/><br><input type="checkbox"/> |  |
| 41<br>42<br>43        | 628                                                                                                                                  | Forceps                                                                                                                                  | A. Number<br>B. Number Working<br>C. Number regularly used                                 | <input type="checkbox"/><br><input type="checkbox"/><br><input type="checkbox"/> |  |
| 44<br>45<br>46        | 629                                                                                                                                  | Manual vacuum aspirator/suction bulb                                                                                                     | A. Number<br>B. Number Working<br>C. Number regularly used                                 | <input type="checkbox"/><br><input type="checkbox"/><br><input type="checkbox"/> |  |
| 47<br>48<br>49        | 630                                                                                                                                  | Resuscitation bag , newborn                                                                                                              | A. Number<br>B. Number Working<br>C. Number regularly used                                 | <input type="checkbox"/><br><input type="checkbox"/><br><input type="checkbox"/> |  |
| 50<br>51<br>52        | 631                                                                                                                                  | Eye drops or ointment for newborn                                                                                                        | A. Number<br>B. Number Working<br>C. Number regularly used                                 | <input type="checkbox"/><br><input type="checkbox"/><br><input type="checkbox"/> |  |
| 53<br>54<br>55        | 632                                                                                                                                  | Needles and syringes (10-20 cc)                                                                                                          | A. Number<br>B. Number Working<br>C. Number regularly used                                 | <input type="checkbox"/><br><input type="checkbox"/><br><input type="checkbox"/> |  |

|                                                    |                                                       |                                                                                                                                                                                                                                                                |                                                                      |               |
|----------------------------------------------------|-------------------------------------------------------|----------------------------------------------------------------------------------------------------------------------------------------------------------------------------------------------------------------------------------------------------------------|----------------------------------------------------------------------|---------------|
| 633                                                | Sterile C-section instrument kits                     | A. Number<br>B. Number Working<br>C. Number regularly used                                                                                                                                                                                                     | <input type="text"/><br><input type="text"/><br><input type="text"/> |               |
| 634                                                | Cord supplies for new born: clamps, ties, scissors    | A. Number<br>B. Number Working<br>C. Number regularly used                                                                                                                                                                                                     | <input type="text"/><br><input type="text"/><br><input type="text"/> |               |
| 635                                                | IV sets, including sterilized needle and tube         | A. Number<br>B. Number Working<br>C. Number regularly used                                                                                                                                                                                                     | <input type="text"/><br><input type="text"/><br><input type="text"/> |               |
| 636                                                | IV fluids, including normal saline and ringer lactate | A. Number<br>B. Number Working<br>C. Number regularly used                                                                                                                                                                                                     | <input type="text"/><br><input type="text"/><br><input type="text"/> |               |
| <b>MATERNAL AND NEONATAL CARE: Postpartum Care</b> |                                                       |                                                                                                                                                                                                                                                                |                                                                      |               |
| 637                                                | Are postpartum care services offered routinely?       | Yes, in the facility as part of routine services only.....1<br>Yes, in the facility as part of routine services and in special clinics...2<br>NO, not as part of routine services but only in special clinics.....3<br>NO, not offered at this facility .....4 | <input type="checkbox"/>                                             | If 4<br>→ 645 |
| <b>Are the following services provided?</b>        |                                                       |                                                                                                                                                                                                                                                                |                                                                      |               |
| 638                                                | Maternal examination & treatment                      | Yes ..... 1<br>No..... 2                                                                                                                                                                                                                                       | <input type="checkbox"/>                                             |               |
| 639                                                | Breast feeding counseling                             | Yes ..... 1<br>No..... 2                                                                                                                                                                                                                                       | <input type="checkbox"/>                                             |               |
| 640                                                | Newborn examination & treatment                       | Yes ..... 1<br>No..... 2                                                                                                                                                                                                                                       | <input type="checkbox"/>                                             |               |
| 641                                                | Growth Monitoring & promotion                         | Yes ..... 1<br>No..... 2                                                                                                                                                                                                                                       | <input type="checkbox"/>                                             |               |
| 642                                                | Vaccination counseling                                | Yes ..... 1<br>No..... 2                                                                                                                                                                                                                                       | <input type="checkbox"/>                                             |               |
| 643                                                | Family planning counseling                            | Yes ..... 1<br>No..... 2                                                                                                                                                                                                                                       | <input type="checkbox"/>                                             |               |
| 644                                                | Treatment of severe malnutrition                      | Yes ..... 1<br>No..... 2                                                                                                                                                                                                                                       | <input type="checkbox"/>                                             |               |

**Section 6.2: Protocols, Guidelines and Templates**

| <i>Ask to see the protocols and guidelines and check to see which of the following are present.</i> |                                                        |                                       |                          |      |
|-----------------------------------------------------------------------------------------------------|--------------------------------------------------------|---------------------------------------|--------------------------|------|
| No                                                                                                  | Questions and Filters                                  | Coding categories                     | Response                 | Skip |
| 645                                                                                                 | IMCI chart book or wall chart                          | Present ..... 1<br>Not Present..... 2 | <input type="checkbox"/> |      |
| 646                                                                                                 | ARI (NOT PART OF IMCI)                                 | Present ..... 1<br>Not Present..... 2 | <input type="checkbox"/> |      |
| 647                                                                                                 | Diagnosis and treatment of diarrhea (NOT PART OF IMCI) | Present ..... 1<br>Not Present..... 2 | <input type="checkbox"/> |      |
| 648                                                                                                 | Graphs for growth monitoring                           | Present ..... 1<br>Not Present..... 2 | <input type="checkbox"/> |      |
| 649                                                                                                 | Treatment of severe malnutrition                       | Present ..... 1<br>Not Present..... 2 | <input type="checkbox"/> |      |
| 650                                                                                                 | Tuberculosis diagnosis and treatment                   | Present ..... 1<br>Not Present..... 2 | <input type="checkbox"/> |      |
| 651                                                                                                 | NHIS guidelines                                        | Present ..... 1<br>Not Present..... 2 | <input type="checkbox"/> |      |

|     |                                            |                                       |                          |  |
|-----|--------------------------------------------|---------------------------------------|--------------------------|--|
| 652 | Malaria Protocol                           | Present ..... 1<br>Not Present..... 2 | <input type="checkbox"/> |  |
| 653 | Immunization schedule                      | Present ..... 1<br>Not Present..... 2 | <input type="checkbox"/> |  |
| 654 | Family planning                            | Present ..... 1<br>Not Present..... 2 | <input type="checkbox"/> |  |
| 655 | Are patient education materials displayed? | Present ..... 1<br>Not Present..... 2 | <input type="checkbox"/> |  |

### Section 6.3: Laboratory tests

| <i>Ask to see the protocols and guidelines and check to see which of the following are present.</i> |                                                                      |                                                                                                                               |                          |              |
|-----------------------------------------------------------------------------------------------------|----------------------------------------------------------------------|-------------------------------------------------------------------------------------------------------------------------------|--------------------------|--------------|
| No                                                                                                  | Questions and Filters                                                | Coding categories                                                                                                             | Response                 | Skip         |
| 656                                                                                                 | Malaria tests (Malaria RDT)                                          | Able to do this test today ..... 1<br>Able to do this test in past 6 months but not today....2<br>Cannot do this test ..... 3 | <input type="checkbox"/> |              |
| 657                                                                                                 | Does this facility perform laboratory tests other than malaria test? | Yes ..... 1<br>No..... 2                                                                                                      | <input type="checkbox"/> | If 2<br>→670 |
| 658                                                                                                 | Anemia testing                                                       | Able to do this test today ..... 1<br>Able to do this test in past 6 months but not today....2<br>Cannot do this test ..... 3 | <input type="checkbox"/> |              |
| 659                                                                                                 | Urine for R/M/E                                                      | Able to do this test today ..... 1<br>Able to do this test in past 6 months but not today....2<br>Cannot do this test ..... 3 | <input type="checkbox"/> |              |
| 660                                                                                                 | Blood Glucose                                                        | Able to do this test today ..... 1<br>Able to do this test in past 6 months but not today....2<br>Cannot do this test ..... 3 | <input type="checkbox"/> |              |
| 661                                                                                                 | Stool for RE                                                         | Able to do this test today ..... 1<br>Able to do this test in past 6 months but not today....2<br>Cannot do this test ..... 3 | <input type="checkbox"/> |              |
| 662                                                                                                 | HIV Testing                                                          | Able to do this test today ..... 1<br>Able to do this test in past 6 months but not today....2<br>Cannot do this test ..... 3 | <input type="checkbox"/> |              |
| 663                                                                                                 | TB Smears                                                            | Able to do this test today ..... 1<br>Able to do this test in past 6 months but not today....2<br>Cannot do this test ..... 3 | <input type="checkbox"/> |              |
| 664                                                                                                 | Gram Stains                                                          | Able to do this test today ..... 1<br>Able to do this test in past 6 months but not today....2<br>Cannot do this test ..... 3 | <input type="checkbox"/> |              |
| 665                                                                                                 | Blood Typing and cross matching                                      | Able to do this test today ..... 1<br>Able to do this test in past 6 months but not today....2<br>Cannot do this test ..... 3 | <input type="checkbox"/> |              |
| 666                                                                                                 | Syphilis testing                                                     | Able to do this test today ..... 1<br>Able to do this test in past 6 months but not today....2<br>Cannot do this test ..... 3 | <input type="checkbox"/> |              |
| 667                                                                                                 | Liver function testing                                               | Able to do this test today ..... 1<br>Able to do this test in past 6 months but not today....2<br>Cannot do this test ..... 3 | <input type="checkbox"/> |              |
| 668                                                                                                 | Pregnancy testing                                                    | Able to do this test today ..... 1<br>Able to do this test in past 6 months but not today....2<br>Cannot do this test ..... 3 | <input type="checkbox"/> |              |
| 669                                                                                                 | Hepatitis                                                            | Able to do this test today ..... 1<br>Able to do this test in past 6 months but not today....2<br>Cannot do this test ..... 3 | <input type="checkbox"/> |              |

## Section 6.4: Pharmacy room, drug storage area and supply system

| No  | Questions and Filters                                                                                                        | Coding categories                                                                                                                                                                                                                                                                                                      | Response                 | Skip          |
|-----|------------------------------------------------------------------------------------------------------------------------------|------------------------------------------------------------------------------------------------------------------------------------------------------------------------------------------------------------------------------------------------------------------------------------------------------------------------|--------------------------|---------------|
| 670 | Is there a separate room/space for drug storage?                                                                             | Yes ..... 1<br>No ..... 2                                                                                                                                                                                                                                                                                              | <input type="checkbox"/> | If 2<br>→ 749 |
| 671 | Are doors and windows secured in the drug storage area?                                                                      | Yes ..... 1<br>No ..... 2                                                                                                                                                                                                                                                                                              | <input type="checkbox"/> |               |
| 672 | Drug storage area has ventilation?                                                                                           | Yes ..... 1<br>No ..... 2                                                                                                                                                                                                                                                                                              | <input type="checkbox"/> |               |
| 673 | Are there enough shelves for storing drugs/other supplies (nothing on the floor)?                                            | Yes ..... 1<br>No ..... 2                                                                                                                                                                                                                                                                                              | <input type="checkbox"/> |               |
| 674 | Are the stored items protected from sun?                                                                                     | Yes ..... 1<br>No ..... 2                                                                                                                                                                                                                                                                                              | <input type="checkbox"/> |               |
| 675 | Are the stored items protected from rain?                                                                                    | Yes ..... 1<br>No ..... 2                                                                                                                                                                                                                                                                                              | <input type="checkbox"/> |               |
| 676 | Is/are there functioning refrigerator/s for storing drugs?                                                                   | Yes ..... 1<br>No ..... 2                                                                                                                                                                                                                                                                                              | <input type="checkbox"/> |               |
| 677 | How many boxes of drugs did you receive in the last six months (Push system)?                                                | Number of Boxes                                                                                                                                                                                                                                                                                                        | <input type="text"/>     |               |
| 678 | When do you think you might get next batch of boxes (Push system)?                                                           | Less than 2 weeks ..... 1<br>2 weeks to 1 month ..... 2<br>1 to 2 months ..... 3<br>More than 2 months ..... 4                                                                                                                                                                                                         | <input type="checkbox"/> |               |
| 679 | Currently, do you or your staff order medicines for the health facility?                                                     | Yes ..... 1<br>No ..... 2                                                                                                                                                                                                                                                                                              | <input type="checkbox"/> |               |
| 680 | If yes, from where do you order most of the drugs used in the facility?                                                      | Referral health facility / Hospital ..... 1<br>Provincial / district health office ..... 2<br>Area Medical store ..... 3<br>Provincial Medical Store ..... 4<br>NDoH ..... 5                                                                                                                                           | <input type="checkbox"/> |               |
| 681 | When did you order drugs last time?                                                                                          | Less than a month ago ..... 1<br>1 month to less than 2 months ..... 2<br>2 months to less than 3 months ..... 3<br>3 months to less than 4 months ..... 4<br>4 months to less than 6 months ..... 5<br>6 months to less than 9 months ..... 6<br>9 months to less than 1 year ..... 7<br>More than 1 year ago ..... 8 | <input type="checkbox"/> |               |
| 682 | Where did you order for the drug last time?                                                                                  | Referral health facility / Hospital ..... 1<br>Provincial / district health office ..... 2<br>Area Medical store ..... 3<br>Provincial Medical Store ..... 4<br>NDoH ..... 5                                                                                                                                           | <input type="checkbox"/> |               |
| 683 | The previous order you received (not the last order), how long it took for the drugs to arrive after the placement of order? | Less than 2 weeks ..... 1<br>2 weeks to 1 month ..... 2<br>1 to 2 months ..... 3<br>More than 2 months ..... 4                                                                                                                                                                                                         | <input type="checkbox"/> |               |
| 684 | Do you always get the drugs you ordered?                                                                                     | Yes ..... 1<br>No ..... 2                                                                                                                                                                                                                                                                                              | <input type="checkbox"/> | If 2<br>→ 691 |
| 685 | On average, what percentage of drugs ordered are received?                                                                   | Percent of drugs ordered received                                                                                                                                                                                                                                                                                      | <input type="text"/>     |               |

|                                          |                                                                                                                                                             |                                                                                                                                                   |                             |  |
|------------------------------------------|-------------------------------------------------------------------------------------------------------------------------------------------------------------|---------------------------------------------------------------------------------------------------------------------------------------------------|-----------------------------|--|
| 686                                      | Who normally makes the collection from the facility?                                                                                                        | Community health worker.....1<br>Volunteer.....2<br>Nurse.....3<br>Brought to the facility by suppliers.....4                                     | <input type="checkbox"/>    |  |
| 687                                      | How is the drug delivered to the facility?                                                                                                                  | Facility gets the drug from medical store/NDoH....1<br>Medical store/NDoH delivers to the facility.....2<br>Others deliver to the facility .....3 | <input type="checkbox"/>    |  |
| 688                                      | How do you pay the expenses for collecting drugs ordered?                                                                                                   | Province.....1<br>Own budget.....2<br>Referral health facility .....3<br>Others .....4                                                            | <input type="checkbox"/>    |  |
| 689                                      | How much does it cost (all expenses) on one average pick up?                                                                                                | PNG Kina<br>Don't Know: 99999                                                                                                                     | _ _ _ _                     |  |
| 690                                      | Where did you go last time to collect medical supplies?                                                                                                     | Please specify                                                                                                                                    | _ _ _                       |  |
| <b>Medical Supply Kits (Push System)</b> |                                                                                                                                                             |                                                                                                                                                   |                             |  |
| 691                                      | What month and year did you receive your last round of medical supply kits?                                                                                 | Month<br>Year                                                                                                                                     | _ _ _ <br> _ _ _            |  |
| 692                                      | Were the medical supply kits delivered directly or did the facility pick up the kits?                                                                       | Delivered .....1<br>Picked up.....2                                                                                                               | <input type="checkbox"/>    |  |
| 693                                      | List three drugs that you think are more than enough based on needs here in the facility<br>WRITE NAME AND CODE OF THE DRUGS FROM THE SUPPLY KITS DRUG LIST | A _____<br>B _____<br>C _____                                                                                                                     | _ _ _ <br> _ _ _ <br> _ _ _ |  |
| 694                                      | List three drugs that you think are not enough based on needs in the facility?<br>WRITE NAME AND CODE OF THE DRUGS FROM THE SUPPLY KITS DRUG LIST           | A _____<br>B _____<br>C _____                                                                                                                     | _ _ _ <br> _ _ _ <br> _ _ _ |  |
| <b>Purchased Drugs</b>                   |                                                                                                                                                             |                                                                                                                                                   |                             |  |
| 695                                      | Have you purchased additional medicines or medical supplies this year?                                                                                      | Yes .....1<br>No .....2                                                                                                                           | <input type="checkbox"/>    |  |
| 696                                      | If yes, how did you pay for this purchase?                                                                                                                  | Request province.....1<br>Own budget....2<br>Referral health facility .....3                                                                      | <input type="checkbox"/>    |  |
| 697                                      | How much did you spend on additional drugs in 2014?                                                                                                         | PNG Kina                                                                                                                                          | _ _ _ _                     |  |
| 698                                      | Are you planning on purchasing additional drugs in 2015?                                                                                                    | Yes .....1<br>No .....2                                                                                                                           | <input type="checkbox"/>    |  |

## Section 7.1: Availability of Essential Drugs or supplies

| SL # | Drug                                          | Question                                                                 | Response                 | Question                                                                  | Response                 |
|------|-----------------------------------------------|--------------------------------------------------------------------------|--------------------------|---------------------------------------------------------------------------|--------------------------|
|      |                                               | <b>Drugs continuously available last 30 days without any stock-outs?</b> | <b>A</b>                 | <b>Are expired drug present?</b>                                          | <b>B</b>                 |
| 701  | Panadol/ Paracetamol tablet                   | Yes .....1<br>No .....2                                                  | <input type="checkbox"/> | Yes.....1<br>No .....2<br>No expiry date ...3<br>Drug is not present ...4 | <input type="checkbox"/> |
| 702  | Paracetamol liquid                            | Yes .....1<br>No .....2                                                  | <input type="checkbox"/> | Yes.....1<br>No .....2<br>No expiry date ...3<br>Drug is not present ...4 | <input type="checkbox"/> |
| 703  | Diclofenac (pain/inflammation) capsule or tab | Yes .....1<br>No .....2                                                  | <input type="checkbox"/> | Yes.....1<br>No .....2<br>No expiry date ...3<br>Drug is not present ...4 | <input type="checkbox"/> |
| 704  | Pethidine                                     | Yes .....1<br>No .....2                                                  | <input type="checkbox"/> | Yes.....1<br>No .....2<br>No expiry date ...3<br>Drug is not present ...4 | <input type="checkbox"/> |
| 705  | Chloroquine                                   | Yes .....1<br>No .....2                                                  | <input type="checkbox"/> | Yes.....1<br>No .....2<br>No expiry date ...3<br>Drug is not present ...4 | <input type="checkbox"/> |
| 706  | Quinine Injection                             | Yes .....1<br>No .....2                                                  | <input type="checkbox"/> | Yes.....1<br>No .....2<br>No expiry date ...3<br>Drug is not present ...4 | <input type="checkbox"/> |
| 707  | Primaquine                                    | Yes .....1<br>No .....2                                                  | <input type="checkbox"/> | Yes.....1<br>No .....2<br>No expiry date ...3<br>Drug is not present ...4 | <input type="checkbox"/> |
| 708  | Amodiaquine                                   | Yes .....1<br>No .....2                                                  | <input type="checkbox"/> | Yes.....1<br>No .....2<br>No expiry date ...3<br>Drug is not present ...4 | <input type="checkbox"/> |
| 709  | Artemisinin combination                       | Yes .....1<br>No .....2                                                  | <input type="checkbox"/> | Yes.....1<br>No .....2<br>No expiry date ...3<br>Drug is not present ...4 | <input type="checkbox"/> |
| 710  | Fansidar                                      | Yes .....1<br>No .....2                                                  | <input type="checkbox"/> | Yes.....1<br>No .....2<br>No expiry date ...3<br>Drug is not present ...4 | <input type="checkbox"/> |
| 711  | Sulfadoxine tab.                              | Yes .....1<br>No .....2                                                  | <input type="checkbox"/> | Yes.....1<br>No .....2<br>No expiry date ...3<br>Drug is not present ...4 | <input type="checkbox"/> |
| 712  | Pyrimethamine tab.                            | Yes .....1<br>No .....2                                                  | <input type="checkbox"/> | Yes.....1<br>No .....2<br>No expiry date ...3<br>Drug is not present ...4 | <input type="checkbox"/> |

| SL # | Drug             | Question                                                                 | Response                 | Question                                                                  | Response                 |
|------|------------------|--------------------------------------------------------------------------|--------------------------|---------------------------------------------------------------------------|--------------------------|
|      |                  | <b>Drugs continuously available last 30 days without any stock-outs?</b> | <b>A</b>                 | <b>Are expired drug present?</b>                                          | <b>B</b>                 |
| 713  | Rifampicin       | Yes .....1<br>No .....2                                                  | <input type="checkbox"/> | Yes.....1<br>No .....2<br>No expiry date ...3<br>Drug is not present ...4 | <input type="checkbox"/> |
| 714  | Isoniazid        | Yes .....1<br>No .....2                                                  | <input type="checkbox"/> | Yes.....1<br>No .....2<br>No expiry date ...3<br>Drug is not present ...4 | <input type="checkbox"/> |
| 715  | Ethambutol       | Yes .....1<br>No .....2                                                  | <input type="checkbox"/> | Yes.....1<br>No .....2<br>No expiry date ...3<br>Drug is not present ...4 | <input type="checkbox"/> |
| 716  | Pyrazinamide     | Yes .....1<br>No .....2                                                  | <input type="checkbox"/> | Yes.....1<br>No .....2<br>No expiry date ...3<br>Drug is not present ...4 | <input type="checkbox"/> |
| 717  | Streptomycin     | Yes .....1<br>No .....2                                                  | <input type="checkbox"/> | Yes.....1<br>No .....2<br>No expiry date ...3<br>Drug is not present ...4 | <input type="checkbox"/> |
| 718  | TB blister packs | Yes .....1<br>No .....2                                                  | <input type="checkbox"/> | Yes.....1<br>No .....2<br>No expiry date ...3<br>Drug is not present ...4 | <input type="checkbox"/> |
| 719  | Oxytocin         | Yes .....1<br>No .....2                                                  | <input type="checkbox"/> | Yes.....1<br>No .....2<br>No expiry date ...3<br>Drug is not present ...4 | <input type="checkbox"/> |
| 720  | Ergometrine      | Yes .....1<br>No .....2                                                  | <input type="checkbox"/> | Yes.....1<br>No .....2<br>No expiry date ...3<br>Drug is not present ...4 | <input type="checkbox"/> |
| 721  | Lignocaine       | Yes .....1<br>No .....2                                                  | <input type="checkbox"/> | Yes.....1<br>No .....2<br>No expiry date ...3<br>Drug is not present ...4 | <input type="checkbox"/> |
| 722  | Depo-provera     | Yes .....1<br>No .....2                                                  | <input type="checkbox"/> | Yes.....1<br>No .....2<br>No expiry date ...3<br>Drug is not present ...4 | <input type="checkbox"/> |
| 723  | Ferrous sulphate | Yes .....1<br>No .....2                                                  | <input type="checkbox"/> | Yes.....1<br>No .....2<br>No expiry date ...3<br>Drug is not present ...4 | <input type="checkbox"/> |
| 724  | Liniment         | Yes .....1<br>No .....2                                                  | <input type="checkbox"/> | Yes.....1<br>No .....2<br>No expiry date ...3<br>Drug is not present ...4 | <input type="checkbox"/> |

| SL # | Drug                                                         | Question                                                                 | Response                 | Question                                                                  | Response                 |
|------|--------------------------------------------------------------|--------------------------------------------------------------------------|--------------------------|---------------------------------------------------------------------------|--------------------------|
|      |                                                              | <b>Drugs continuously available last 30 days without any stock-outs?</b> | <b>A</b>                 | <b>Are expired drug present?</b>                                          | <b>B</b>                 |
| 725  | Flagyl/ Metronidazole                                        | Yes .....1<br>No .....2                                                  | <input type="checkbox"/> | Yes.....1<br>No .....2<br>No expiry date ...3<br>Drug is not present ...4 | <input type="checkbox"/> |
| 726  | Amoxicillin capsule or tablet                                | Yes .....1<br>No .....2                                                  | <input type="checkbox"/> | Yes.....1<br>No .....2<br>No expiry date ...3<br>Drug is not present ...4 | <input type="checkbox"/> |
| 727  | Co-trimoxazole oral susp or tablet                           | Yes .....1<br>No .....2                                                  | <input type="checkbox"/> | Yes.....1<br>No .....2<br>No expiry date ...3<br>Drug is not present ...4 | <input type="checkbox"/> |
| 728  | Diazepam capsule or tablet                                   | Yes .....1<br>No .....2                                                  | <input type="checkbox"/> | Yes.....1<br>No .....2<br>No expiry date ...3<br>Drug is not present ...4 | <input type="checkbox"/> |
| 729  | Amitriptyline 25 mg, capsule or tablet (depression medicine) | Yes .....1<br>No .....2                                                  | <input type="checkbox"/> | Yes.....1<br>No .....2<br>No expiry date ...3<br>Drug is not present ...4 | <input type="checkbox"/> |
| 730  | Paraldehyde                                                  | Yes .....1<br>No .....2                                                  | <input type="checkbox"/> | Yes.....1<br>No .....2<br>No expiry date ...3<br>Drug is not present ...4 | <input type="checkbox"/> |
| 731  | Albendazole tab                                              | Yes .....1<br>No .....2                                                  | <input type="checkbox"/> | Yes.....1<br>No .....2<br>No expiry date ...3<br>Drug is not present ...4 | <input type="checkbox"/> |
| 732  | Tinidazole tab                                               | Yes .....1<br>No .....2                                                  | <input type="checkbox"/> | Yes.....1<br>No .....2<br>No expiry date ...3<br>Drug is not present ...4 | <input type="checkbox"/> |
| 733  | Ciprofloxacin capsule or tablet (usually 500 mg)             | Yes .....1<br>No .....2                                                  | <input type="checkbox"/> | Yes.....1<br>No .....2<br>No expiry date ...3<br>Drug is not present ...4 | <input type="checkbox"/> |
| 734  | Crystalline penicillin injection                             | Yes .....1<br>No .....2                                                  | <input type="checkbox"/> | Yes.....1<br>No .....2<br>No expiry date ...3<br>Drug is not present ...4 | <input type="checkbox"/> |
| 735  | Ceftriaxone 1g/vial injection                                | Yes .....1<br>No .....2                                                  | <input type="checkbox"/> | Yes.....1<br>No .....2<br>No expiry date ...3<br>Drug is not present ...4 | <input type="checkbox"/> |
| 736  | Chloramphenicol injection                                    | Yes .....1<br>No .....2                                                  | <input type="checkbox"/> | Yes.....1<br>No .....2<br>No expiry date ...3<br>Drug is not present ...4 | <input type="checkbox"/> |



| SL # | Drug                                                            | Question                                                                 | Response                 | Question                                                                  | Response                 |
|------|-----------------------------------------------------------------|--------------------------------------------------------------------------|--------------------------|---------------------------------------------------------------------------|--------------------------|
|      |                                                                 | <b>Drugs continuously available last 30 days without any stock-outs?</b> | <b>A</b>                 | <b>Are expired drug present?</b>                                          | <b>B</b>                 |
| 737  | Mala wan (1)                                                    | Yes .....1<br>No .....2                                                  | <input type="checkbox"/> | Yes.....1<br>No .....2<br>No expiry date ...3<br>Drug is not present ...4 | <input type="checkbox"/> |
| 738  | Captopril, 25 mg, capsule or tab                                | Yes .....1<br>No .....2                                                  | <input type="checkbox"/> | Yes.....1<br>No .....2<br>No expiry date ...3<br>Drug is not present ...4 | <input type="checkbox"/> |
| 739  | Atenolol 50 mg, capsule or tablet (Cardiovascular disease drug) | Yes .....1<br>No .....2                                                  | <input type="checkbox"/> | Yes.....1<br>No .....2<br>No expiry date ...3<br>Drug is not present ...4 | <input type="checkbox"/> |
| 740  | Simvastatin 20 mg, capsule or tablet                            | Yes .....1<br>No .....2                                                  | <input type="checkbox"/> | Yes.....1<br>No .....2<br>No expiry date ...3<br>Drug is not present ...4 | <input type="checkbox"/> |
| 741  | Glibenclamide 5mg, capsule or tablet (for diabetes)             | Yes .....1<br>No .....2                                                  | <input type="checkbox"/> | Yes.....1<br>No .....2<br>No expiry date ...3<br>Drug is not present ...4 | <input type="checkbox"/> |
| 742  | Salbutamol tab 4 mg                                             | Yes .....1<br>No .....2                                                  | <input type="checkbox"/> | Yes.....1<br>No .....2<br>No expiry date ...3<br>Drug is not present ...4 | <input type="checkbox"/> |
| 743  | CMP(Chlorpheniramine maleate) tablet                            | Yes .....1<br>No .....2                                                  | <input type="checkbox"/> | Yes.....1<br>No .....2<br>No expiry date ...3<br>Drug is not present ...4 | <input type="checkbox"/> |
| 744  | Omeprazole (capsule or tablet)                                  | Yes .....1<br>No .....2                                                  | <input type="checkbox"/> | Yes.....1<br>No .....2<br>No expiry date ...3<br>Drug is not present ...4 | <input type="checkbox"/> |
| 745  | ART for HIV/AIDS                                                | Yes .....1<br>No .....2                                                  | <input type="checkbox"/> | Yes.....1<br>No .....2<br>No expiry date ...3<br>Drug is not present ...4 | <input type="checkbox"/> |

**Table 7.2: Availability and Stock-out information of other supplies**

| SL #                                              |                             | Available for use today<br>(Yes=1, No=2) | Continuously available in the last 30 days<br>without any stock-outs? (Yes=1, No=2) |
|---------------------------------------------------|-----------------------------|------------------------------------------|-------------------------------------------------------------------------------------|
| Family Planning items                             |                             |                                          |                                                                                     |
| 749                                               | Family planning: Oral pills |                                          |                                                                                     |
| 750                                               | Family planning Injections  |                                          |                                                                                     |
| 751                                               | Condoms                     |                                          |                                                                                     |
| Vaccines and related items                        |                             |                                          |                                                                                     |
| 752                                               | BCG                         |                                          |                                                                                     |
| 753                                               | HEP B                       |                                          |                                                                                     |
| 754                                               | Vitamin A                   |                                          |                                                                                     |
| 755                                               | Sabin                       |                                          |                                                                                     |
| 756                                               | DTP/Hib                     |                                          |                                                                                     |
| 757                                               | Measles                     |                                          |                                                                                     |
| 758                                               | Tetanus Toxoid              |                                          |                                                                                     |
| 759                                               | Iron tablet or folic acid   |                                          |                                                                                     |
| Availability of Kits for Malaria, TB and HIV/AIDS |                             |                                          |                                                                                     |
| 760                                               | HIV/AIDS Test Kit           |                                          |                                                                                     |
| 761                                               | RDT Test kit for Malaria    |                                          |                                                                                     |
| 762                                               | TB Category 1 kit           |                                          |                                                                                     |
| 762                                               | TB Category 2 kit           |                                          |                                                                                     |
| Other items                                       |                             |                                          |                                                                                     |
| 763                                               | ORS for diarrhea            |                                          |                                                                                     |
| 764                                               | HS Darrows                  |                                          |                                                                                     |
| 765                                               | Oxygen                      |                                          |                                                                                     |
| 766                                               | Baby/scale book             |                                          |                                                                                     |
| 767                                               | Mother's health book        |                                          |                                                                                     |
| 768                                               | Quarterly TB report book    |                                          |                                                                                     |
| 769                                               | Monthly report forms        |                                          |                                                                                     |
| 770                                               | Health center record books  |                                          |                                                                                     |
| 771                                               | Daily summary book          |                                          |                                                                                     |

## Section 7.3: EPI and Cold Chain

| No  | Questions and Filters                                                                                                                        | Coding categories                                                                                                      | Response                 | Skip          |
|-----|----------------------------------------------------------------------------------------------------------------------------------------------|------------------------------------------------------------------------------------------------------------------------|--------------------------|---------------|
| 772 | Does this facility provide EPI services?                                                                                                     | Yes ..... 1<br>No ..... 2                                                                                              | <input type="checkbox"/> | If 2<br>→ 801 |
| 773 | Does this facility provide opportunistic immunizations (i.e., immunization provided when an unimmunized child shows up)?                     | Yes ..... 1<br>No ..... 2                                                                                              | <input type="checkbox"/> |               |
| 774 | Are child immunizations regularly given to children at this facility or in outreach EPI activities?                                          | Yes, at facility only ..... 1<br>Yes, at outreach only ..... 2<br>Yes, both facilities & outreach ..... 3              | <input type="checkbox"/> | If 1<br>→ 777 |
| 775 | How many EPI outreach activities were conducted in the past 3 months?                                                                        | Number EPI outreach activities                                                                                         | _ _ _                    |               |
| 776 | How many children were vaccinated during past three months and what proportion of total children was vaccinated through outreach activities? | A. Total immunized<br><br>B. % immunize through outreach                                                               | _ _ _ <br><br> _ _ _     |               |
| 777 | How is the main vaccine refrigerator powered?                                                                                                | None ..... 1<br>Fuel ..... 2<br>Electric ..... 3<br>Solar ..... 4<br>Gas ..... 5<br>Other ..... 6<br><i>Specify</i>    | <input type="checkbox"/> | If 1<br>→ 782 |
| 778 | Is the main vaccine refrigerator working?                                                                                                    | Yes ..... 1<br>No ..... 2                                                                                              | <input type="checkbox"/> |               |
| 779 | Is the main vaccine thermometer present and working?                                                                                         | Yes ..... 1<br>No ..... 2                                                                                              | <input type="checkbox"/> |               |
| 780 | Is a temperature log kept                                                                                                                    | At least twice a day for past 30 days ..... 1<br>Less than twice a day readings ..... 2<br>No vaccine log kept ..... 3 | <input type="checkbox"/> | If 1<br>→ 782 |
| 781 | # of days in the past month in which refrigerator temp over 8°C or under 0°C                                                                 | Number of days<br>Don't know ..... 98                                                                                  | _ _                      |               |
| 782 | Are most of the cold boxes/vaccine carriers functional /working?                                                                             | Almost all working ..... 1<br>Most not working ..... 2<br>Do not have ..... 3                                          | <input type="checkbox"/> |               |
| 783 | Are ice packs present and in good condition?                                                                                                 | Present, good condition ..... 1<br>Present, not good condition ..... 2<br>Not present ..... 3                          | <input type="checkbox"/> |               |
| 784 | Are adequate immunization cards present for at least 30 days? (Based on estimation by in-charge)                                             | Yes ..... 1<br>No ..... 2                                                                                              | <input type="checkbox"/> |               |

## Section 8.1 Health Outreach Patrols

| SL No | Questions and Filters                                                                                                                                          | Coding categories                                                                                                                                   | Response                                   | Skip         |
|-------|----------------------------------------------------------------------------------------------------------------------------------------------------------------|-----------------------------------------------------------------------------------------------------------------------------------------------------|--------------------------------------------|--------------|
| 801   | Does this facility conduct outreach patrols in the community?                                                                                                  | Yes ..... 1<br>No ..... 2                                                                                                                           | <input type="checkbox"/>                   | If 2<br>→822 |
| 802   | How many health outreach patrols to villages were planned in 2014?                                                                                             | Number of days<br>Don't know ..... 998                                                                                                              | _  _  _  _                                 |              |
| 803   | How many health outreach patrols to villages were conducted in 2014?                                                                                           | Number of days<br>Don't know ..... 998                                                                                                              | _  _  _  _                                 |              |
| 804   | How many for each of the following types conducted in 2014?                                                                                                    | A. Maternal and child health (MCH)<br>B. Immunization<br>C. Joint outreach clinics                                                                  | _  _  _  _<br>  _  _  _  _<br>  _  _  _  _ |              |
| 805   | If the number conducted is less than the number planned, what are the reasons?                                                                                 | Lack of funds ..... 1<br>Lack of fuel ..... 2<br>Lack of staff ..... 3<br>Unwillingness of staff to travel ..... 4                                  | <input type="checkbox"/>                   |              |
| 806   | How many villages/patrol sites are reached on a typical patrol?                                                                                                | Number<br>Don't know ..... 98                                                                                                                       | _  _  _  _                                 |              |
| 807   | What is the typical average time taken to conduct one patrol? i.e., how long are health workers normally away from the facility at a time.                     | Half day ..... 1<br>One day ..... 2<br>Two days ..... 3<br>Three days ..... 4<br>More than three days ..... 5                                       | <input type="checkbox"/>                   |              |
| 808   | Do health workers receive an allowance to go out on patrol?                                                                                                    | Yes .....<br>No ..... 2                                                                                                                             | <input type="checkbox"/>                   |              |
| 809   | If yes, how much per typical patrol?                                                                                                                           | PNG Kina<br>Don't know ..... 998                                                                                                                    | _  _  _  _  _  _  _  _  _  _               |              |
| 810   | Are porters / volunteers / casual health staff used to help this facility carry out patrols?                                                                   | Yes ..... 1<br>No ..... 2                                                                                                                           | <input type="checkbox"/>                   |              |
| 811   | Is the health information gathered from conducting a patrol incorporated into monthly reporting for this health facility?                                      | Yes .....<br>No ..... 2                                                                                                                             | <input type="checkbox"/>                   |              |
| 812   | What proportion of total catchment population is served either through the facility or the outreach patrols in a quarter?                                      | Almost all served ..... 1<br>Majority served ..... 2<br>More than quarter served ..... 3<br>Less than quarter served ..... 4<br>None served ..... 5 | <input type="checkbox"/>                   |              |
| 813   | What proportion of total catchment population do you think live in "remote areas" (at least a day's walk from an operational road)?                            | % of population                                                                                                                                     | _  _  _  _  _  _  _  _  _  _               |              |
| 814   | What proportion of the "remote areas" population covered?                                                                                                      | % of population                                                                                                                                     | _  _  _  _  _  _  _  _  _  _               |              |
| 815   | Do you receive support and involvement from 'higher levels' (i.e. hospitals, district health office) such as doctors, specialists accompanying you on patrols? | Yes .....<br>No ..... 2                                                                                                                             | <input type="checkbox"/>                   |              |

| SL No | Questions and Filters                                                                                                                                            | Coding categories                                                                                                                                                     | Response                 | Skip         |
|-------|------------------------------------------------------------------------------------------------------------------------------------------------------------------|-----------------------------------------------------------------------------------------------------------------------------------------------------------------------|--------------------------|--------------|
| 816   | If yes, please specify the designation of that personnel<br>RECORD 1 IF THE PERSONNEL ACCOMPANIED AND 2 IF NOT ACCOMPANIED                                       | A. Doctor<br>B. Specialist<br>C. Administrators/ Managers<br>D. Other health personnel<br>E. Security personnel<br>F. Other _____<br>Specify                          |                          |              |
| 817   | In your opinion, has the system of conducting regular outreach patrols to rural and remote communities in the past five years gotten better, worse or stagnated? | Better.....1<br>Stagnated.....2<br>Worse.....3                                                                                                                        | <input type="checkbox"/> |              |
| 818   | The reasons for this change over the last five years<br>RECORD 1 IF THE REASON IS MENTIONED AND 2 IF NOT MENTIONED                                               | A. Availability of funds<br>B. Availability of transportation<br>C. Availability of staff<br>D. Weather<br>E. Unrest<br>F. Other _____<br>Specify                     |                          |              |
| 819   | If a health patrol finds very sick patients in remote areas, what action is normally taken?                                                                      | Ask community for help .....1<br>Call health centre.....2<br>Report back to health facility. ....3<br>Other, specify. ....4                                           | <input type="checkbox"/> |              |
| 820   | Do you have the means to respond immediately to the health emergency?                                                                                            | Yes .....1<br>No .....2                                                                                                                                               | <input type="checkbox"/> | If 2<br>→822 |
| 821   | How do you respond to health emergencies<br>RECORD 1 IF THE WAY IS MENTIONED AND 2 IF NOT MENTIONED                                                              | A. Call ambulance or vehicle to transport patient<br>B. Call specialist from the local hospital<br>C. Inform emergency situation to NDOH<br>D. Other _____<br>Specify |                          |              |

## Section 8.2: Administration and management

| SL No | Questions and Filters                                                                                                                                                       | Coding categories                                                                                                                        | Response                                     | Skip          |
|-------|-----------------------------------------------------------------------------------------------------------------------------------------------------------------------------|------------------------------------------------------------------------------------------------------------------------------------------|----------------------------------------------|---------------|
| 822   | How many health care providers arrived at the facility on time today (+/- 10 minutes)                                                                                       | Number of days<br>Don't know..... 9998                                                                                                   | <input type="text"/>                         |               |
| 823   | How many HEOs, nurses, midwives, and CHWs arrived on time at the facility today?                                                                                            | Number of days<br>Don't know..... 9998                                                                                                   | <input type="text"/>                         |               |
| 824   | How many doctors are present now?<br>RECORD "98" FOR THE NUMBER IF NOT KNOWN                                                                                                | A. Time now: Hour and Minute<br><br>C. Number present:                                                                                   | <input type="text"/><br><input type="text"/> |               |
| 825   | Are there enough official registers, stationery and other supplies?                                                                                                         | Yes ..... 1<br>No ..... 2                                                                                                                | <input type="checkbox"/>                     |               |
| 826   | Are there enough forms for the admission and discharge?                                                                                                                     | Yes ..... 1<br>No ..... 2<br>Not applicable ..... 2                                                                                      | <input type="checkbox"/>                     |               |
| 827   | How many meetings of the facility staff were held in past three months?                                                                                                     | Number<br>Don't know..... 98                                                                                                             | <input type="text"/>                         |               |
| 828   | Is there a Hospital/facility community advisory committee/Village Health Committees in this area?                                                                           | Yes..... 1<br>No..... 2                                                                                                                  | <input type="checkbox"/>                     | If 2<br>→ 831 |
| 829   | How many meetings of the Hospital/facility community advisory committee were held in past three months?                                                                     | Number held in past year<br>Don't know..... 998                                                                                          | <input type="text"/>                         |               |
| 830   | Does the facility have written records of activities carried out by the Hospital/facility community advisory committee?                                                     | Yes ..... 1<br>No ..... 2                                                                                                                | <input type="checkbox"/>                     |               |
| 831   | Is there an asset registry (equipment and furniture inventory)?<br><i>Ask to see the inventory; if health staff report having list but do not show it to you, circle 4.</i> | Yes..... 1<br>Present, not complete..... 2<br>Not present..... 3<br>Staff report having inventory but do not show it to surveyor ..... 4 | <input type="checkbox"/>                     |               |
| 832   | When was the last time inventory updated?                                                                                                                                   | Within last one month..... 1<br>With last three months..... 2<br>Within last six months..... 3<br>More than six months ago..... 4        | <input type="checkbox"/>                     |               |
| 833   | Did the health facility have to close for any reason this year?                                                                                                             | Yes ..... 1<br>No ..... 2                                                                                                                | <input type="checkbox"/>                     | If 2<br>→ 835 |
| 834   | If yes, how long and the reason for disruption in operations.                                                                                                               | A. Days remaining closed last year:<br><br>B. Reason (please specify): _____                                                             | <input type="text"/><br><input type="text"/> |               |

## Section 8.3: Supervision

| SL No | Questions and Filters                                                                                                                                                                                                                                                             | Coding categories                                                                                                                                                                                 | Response                 | Skip          |
|-------|-----------------------------------------------------------------------------------------------------------------------------------------------------------------------------------------------------------------------------------------------------------------------------------|---------------------------------------------------------------------------------------------------------------------------------------------------------------------------------------------------|--------------------------|---------------|
| 835   | Is there at least one officially assigned external supervisor for this health facility?                                                                                                                                                                                           | Yes.....1<br>No.....2                                                                                                                                                                             | <input type="checkbox"/> | If 2<br>→ 838 |
| 836   | What are the designations of the supervisors who visited the health facility in the last one year and how many times did they visit?<br>RECORD THE NUMBER OF VISITS FOR EACH KIND OF SUPERVISOR IN RESPONSE COLUMN AND RECORD 00 IF NO SUPERVISION DONE BY THAT TYPE OF PERSONNEL | A. Doctor<br>B. PHO<br>C. DHA<br>D. PDCO<br>E. Maternal and Child Health<br>F. Church Health Secretary<br>G. Other _____<br>Specify                                                               |                          |               |
| 837   | What were the purpose/ reasons for latest supervisor's visit?<br>RECORD 1 IF THE REASON MENTIONED AND 2 IF NOT MENTIONED                                                                                                                                                          | A. Overall activities in the facility<br>B. Drug Storage and Distribution<br>C. Auditing the finance<br>D. Maternal/Child health Services<br>E. Immunization program<br>F. Other _____<br>Specify |                          |               |
| 838   | Does a doctor work at this health facility?                                                                                                                                                                                                                                       | Yes.....1<br>No .....2                                                                                                                                                                            | <input type="checkbox"/> | If 1<br>→ 840 |
| 839   | If no, how many times has a doctor visited this health facility in 2014?                                                                                                                                                                                                          | Number<br>Don't know.....998                                                                                                                                                                      | _ _ _                    |               |
| 840   | Does a Health Extension Officer work at this health facility?                                                                                                                                                                                                                     | Yes.....1<br>No .....2                                                                                                                                                                            | <input type="checkbox"/> | If 1<br>→ 842 |
| 841   | If no, how many times did a Health Extension Officer (HEO) visit this health facility in 2014?                                                                                                                                                                                    | Number<br>Don't know.....998                                                                                                                                                                      | _ _ _                    |               |
| 842   | Does this health facility supervise aid posts / sub-health centers?                                                                                                                                                                                                               | Yes .....1<br>No.....2                                                                                                                                                                            | <input type="checkbox"/> | If 2<br>→ 844 |
| 843   | If yes, how many?                                                                                                                                                                                                                                                                 | Number<br>Don't know.....998                                                                                                                                                                      | _ _ _                    |               |
| 844   | How many supervisory visits were made to these clinics in 2014?                                                                                                                                                                                                                   | Number<br>Don't know.....998                                                                                                                                                                      | _ _ _                    |               |
| 845   | How are the costs for supervisory visits paid for at the health facility?                                                                                                                                                                                                         | Request province.....1<br>Request district.....2<br>Own budget.....3<br>Referral health facility .....4                                                                                           | <input type="checkbox"/> |               |
| 846   | Are any other tasks carried out in conjunction with conducting supervisory visits?<br>RECORD 1 IF THE TASK MENTIONED AND 2 IF NOT MENTIONED                                                                                                                                       | A. Consultation to patients<br>B. MCH services<br>C. Care in Well baby Clinic<br>D. Immunization services<br>E. Other _____<br>Specify                                                            |                          |               |
| 847   | Were recommendations written in a supervision book from last supervision?                                                                                                                                                                                                         | Book present, recommendations written.....1<br>Book present, No recommendations.....2<br>No book.....3                                                                                            | <input type="checkbox"/> |               |

## Section 8.4: Autonomy [Respondent: Health Facility Manager only]

| SL No | Questions and Filters                                                                                                                                            | Coding categories                                                                                                                                                                                                                                                                                                                                                     | Response                 | Skip |
|-------|------------------------------------------------------------------------------------------------------------------------------------------------------------------|-----------------------------------------------------------------------------------------------------------------------------------------------------------------------------------------------------------------------------------------------------------------------------------------------------------------------------------------------------------------------|--------------------------|------|
| 848   | What authority do you have to make decision on expenditure of funds provided to your facility?<br>RECORD 1 IF THE DECISION MENTIONED AND 2 IF NOT MENTIONED      | A. Total amount to be spent<br>B. Reallocation of money within same category<br>C. Reallocation between exp categories<br>D. Months in which expenditures can be made<br>E. Can sign cheques to pay suppliers and other vendors                                                                                                                                       |                          |      |
| 849   | Do you need preapprovals for exercising the authorities you have related to fund allocation?                                                                     | Yes ..... 1<br>No ..... 2                                                                                                                                                                                                                                                                                                                                             | <input type="checkbox"/> |      |
| 850   | What authority do you have in decisions related to facility personnel?<br>RECORD 1 IF THE DECISION MENTIONED AND 2 IF NOT MENTIONED                              | A. Disciplinary action/reporting for poor performance<br>B. Identify needs for additional / new staff<br>C. Hiring of new staff<br>D. Determine level of payment for staff<br>E. Allocating tasks/duties to existing staff<br>F. Commending staff for good performance<br>G. Promoting staff to higher position<br>H. Dismissal of staff<br>I. Other _____<br>Specify |                          |      |
| 851   | Do you need preapprovals for exercising the authorities you have related to fund allocation?                                                                     | Yes ..... 1<br>No ..... 2                                                                                                                                                                                                                                                                                                                                             | <input type="checkbox"/> |      |
| 852   | What authority do you have in decisions on the type/organizations of service provision?<br>RECORD 1 IF THE DECISION MENTIONED AND 2 IF NOT MENTIONED             | A. Planning the schedule of services<br>B. Changing the content of services delivered<br>C. Quality of services<br>D. Operating procedures<br>E. Procedures for accessing services<br>F. Charges for services<br>G. Addition of new services<br>H. Other _____<br>Specify                                                                                             |                          |      |
| 853   | For each area of authority: are you satisfied with the level of authority you have?                                                                              | Yes ..... 1<br>No ..... 2                                                                                                                                                                                                                                                                                                                                             | <input type="checkbox"/> |      |
| 854   | If not what type of authority you think you need for improving performance of the health facility?<br>RECORD 1 IF THE AUTHORITY MENTIONED AND 2 IF NOT MENTIONED | A. Authority to generate revenue for facility<br>B. Authority to allocate budget<br>C. Authority to hire and fire staff<br>D. Authority to give reward/punishment<br>E. Authority to plan<br>F. Authority of quality assurance<br>G. Other _____<br>Specify                                                                                                           |                          |      |



**Section 8.5: Barriers to managing facility**

|     |                                                                                                            |                  |   |
|-----|------------------------------------------------------------------------------------------------------------|------------------|---|
| 856 | What are the three main constraints you face in managing this facility effectively?                        | 1.               |   |
|     |                                                                                                            | 2.               |   |
|     |                                                                                                            | 3.               |   |
|     |                                                                                                            | No problem ..... | 9 |
| 857 | Please identify three ways in which the government or your organization could help you do your job better. | 1.               |   |
|     |                                                                                                            | 2.               |   |
|     |                                                                                                            | 3.               |   |
|     |                                                                                                            | No problem ..... | 9 |
| 858 | Suggest three ways of better involving the community with the health facility activities.                  | 1.               |   |
|     |                                                                                                            | 2.               |   |
|     |                                                                                                            | 3.               |   |
|     |                                                                                                            | No problem ..... | 9 |

**Section 8.6: Facility health information systems**

| Review records for the last completed month. |                             | Record the appropriate number in the "Response" column |                                      |                                          |                                                  |                | Response |
|----------------------------------------------|-----------------------------|--------------------------------------------------------|--------------------------------------|------------------------------------------|--------------------------------------------------|----------------|----------|
|                                              |                             | 1. Do not provide the service, no register             | 2. Register Present, fully completed | 3. Register Present, not fully completed | 4. Report having but did not show it to surveyor | 5. Not present |          |
| 859                                          | ANC register                | 1                                                      | 2                                    | 3                                        | 4                                                | 5              |          |
| 860                                          | Delivery/maternity register | 1                                                      | 2                                    | 3                                        | 4                                                | 5              |          |
| 861                                          | OT register                 | 1                                                      | 2                                    | 3                                        | 4                                                | 5              |          |
| 862                                          | Blood bank register         | 1                                                      | 2                                    | 3                                        | 4                                                | 5              |          |
| 863                                          | HIV Register                | 1                                                      | 2                                    | 3                                        | 4                                                | 5              |          |
| 864                                          | TB Register                 | 1                                                      | 2                                    | 3                                        | 4                                                | 5              |          |
| 865                                          | Hospital activity report    | 1                                                      | 2                                    | 3                                        | 4                                                | 5              |          |
| 866                                          | EPI report                  | 1                                                      | 2                                    | 3                                        | 4                                                | 5              |          |
| 867                                          | Family Planning report      | 1                                                      | 2                                    | 3                                        | 4                                                | 5              |          |
| 868                                          | Leprosy report              | 1                                                      | 2                                    | 3                                        | 4                                                | 5              |          |
| 869                                          | Lab register                | 1                                                      | 2                                    | 3                                        | 4                                                | 5              |          |
| 870                                          | Morbidity/ Mortality report | 1                                                      | 2                                    | 3                                        | 4                                                | 5              |          |
| 871                                          | Malaria, Kala-azar report   | 1                                                      | 2                                    | 3                                        | 4                                                | 5              |          |
| 872                                          | Notifiable Disease report   | 1                                                      | 2                                    | 3                                        | 4                                                | 5              |          |
| 873                                          | IMCI report                 | 1                                                      | 2                                    | 3                                        | 4                                                | 5              |          |
| 874                                          | Equipment status report     | 1                                                      | 2                                    | 3                                        | 4                                                | 5              |          |
| 875                                          | Other _____                 | 1                                                      | 2                                    | 3                                        | 4                                                | 5              |          |
| 876                                          | Other _____                 | 1                                                      | 2                                    | 3                                        | 4                                                | 5              |          |
| 877                                          | Other _____                 | 1                                                      | 2                                    | 3                                        | 4                                                | 5              |          |
| 878                                          | Other _____                 | 1                                                      | 2                                    | 3                                        | 4                                                | 5              |          |
| 879                                          | Other _____                 | 1                                                      | 2                                    | 3                                        | 4                                                | 5              |          |

**Section 9: Number of cases by disease or medical conditions for the latest month (based on the latest Health Center Monthly Summary Report available)**

| SL # | Question or items                                                                                                 | Response instructions                                                                                                                                             | Record Response                                                                                                                                                                                                                                                                     | Skip         |  |  |  |  |
|------|-------------------------------------------------------------------------------------------------------------------|-------------------------------------------------------------------------------------------------------------------------------------------------------------------|-------------------------------------------------------------------------------------------------------------------------------------------------------------------------------------------------------------------------------------------------------------------------------------|--------------|--|--|--|--|
| 901  | Does the facility have monthly reports available for review (either from facility or elsewhere)?                  | Yes.....1<br>No.....2                                                                                                                                             | <input type="checkbox"/>                                                                                                                                                                                                                                                            | If 2<br>→904 |  |  |  |  |
| 902  | The month and year of latest monthly report available in the facility or obtained from upper administrative level | Month (MM) and<br><br>Year (YY)                                                                                                                                   | <table border="1" style="display: inline-table; vertical-align: middle;"><tr><td style="width: 20px; height: 20px;"></td><td style="width: 20px; height: 20px;"></td></tr><tr><td style="width: 20px; height: 20px;"></td><td style="width: 20px; height: 20px;"></td></tr></table> |              |  |  |  |  |
|      |                                                                                                                   |                                                                                                                                                                   |                                                                                                                                                                                                                                                                                     |              |  |  |  |  |
|      |                                                                                                                   |                                                                                                                                                                   |                                                                                                                                                                                                                                                                                     |              |  |  |  |  |
| 903  | Is the latest monthly report complete?                                                                            | All fields are recorded/completed.....1<br>Most of the fields completed.....2<br>Most of the fields not completed.....3<br>Only very few items are recorded.....4 | <input type="checkbox"/>                                                                                                                                                                                                                                                            |              |  |  |  |  |

**Table 9.1: Outpatients (from monthly report)**

| SL No | Diseases                                 | Male (Number of cases) | Female (Number of cases) |
|-------|------------------------------------------|------------------------|--------------------------|
|       |                                          | A                      | B                        |
| 904   | Measles (suspected)                      | _____                  | _____                    |
| 905   | Pertussis                                | _____                  | _____                    |
| 906   | Simple cough                             | _____                  | _____                    |
| 907   | Pneumonia (<1 year)                      | _____                  | _____                    |
| 908   | Pneumonia ( 1-4 yrs)                     | _____                  | _____                    |
| 909   | Pneumonia ( 5 yrs+)                      | _____                  | _____                    |
| 910   | Chronic Obstructive Pulmonary Diseases   | _____                  | _____                    |
| 911   | Asthma                                   | _____                  | _____                    |
| 912   | Other upper respiratory tract infections | _____                  | _____                    |
| 913   | Diarrhea (<1 year)                       | _____                  | _____                    |
| 914   | Diarrhea (1-4 yrs)                       | _____                  | _____                    |
| 915   | Diarrhea ( 5 yrs+)                       | _____                  | _____                    |
| 916   | Malaria (<1 year)                        | _____                  | _____                    |
| 917   | Malaria (1-4 yrs)                        | _____                  | _____                    |
| 918   | Malaria ( 5 yrs+)                        | _____                  | _____                    |
| 919   | Malaria (Pregnant women)                 |                        | _____                    |
| 920   | Pyrexia (Fever) of unknown cause (PUO)   | _____                  | _____                    |
| 921   | Anaemia                                  | _____                  | _____                    |
| 922   | Malnutrition (<1 yr)                     | _____                  | _____                    |
| 923   | Malnutrition (1-4 yrs)                   | _____                  | _____                    |
| 924   | Accident /injuries                       | _____                  | _____                    |
| 925   | Genital ulcers                           | _____                  | _____                    |
| 926   | Urethral discharge                       | _____                  |                          |
| 927   | Vaginal discharge                        |                        | _____                    |
| 928   | Pelvic Inflammatory Disease              |                        | _____                    |
| 929   | Genital warts                            | _____                  | _____                    |
| 930   | Latent syphilis (blood test)             | _____                  | _____                    |
| 931   | Other STI                                | _____                  | _____                    |

| SL No | Diseases or medical conditions                                  | Male (Number of cases) | Female (Number of cases) |
|-------|-----------------------------------------------------------------|------------------------|--------------------------|
|       |                                                                 | A                      | B                        |
| 932   | Pulmonary TB suspect                                            |                        |                          |
| 933   | Pulmonary TB confirmed by sputum test                           |                        |                          |
| 934   | Leprosy                                                         |                        |                          |
| 935   | Yaws                                                            |                        |                          |
| 936   | Other skin diseases                                             |                        |                          |
| 937   | Ear infections (including both middle and outer ear infections) |                        |                          |
| 938   | Eye infections                                                  |                        |                          |
| 939   | All other new cases                                             |                        |                          |

Table 9.2: Inpatients (Number of discharges from monthly report)

| SL No | Diseases or medical conditions                | Male (discharges) | Female (discharges) |
|-------|-----------------------------------------------|-------------------|---------------------|
|       |                                               | A                 | B                   |
| 940   | Diphtheria                                    |                   |                     |
| 941   | Neonatal Tetanus                              |                   |                     |
| 942   | Acute Flaccid Paralysis                       |                   |                     |
| 943   | Measles (suspected)                           |                   |                     |
| 944   | Pertussis                                     |                   |                     |
| 945   | Neonatal sepsis                               |                   |                     |
| 946   | Pneumonia (<1 year)                           |                   |                     |
| 947   | Pneumonia ( 1-4 yrs)                          |                   |                     |
| 948   | Pneumonia ( 5 yrs+)                           |                   |                     |
| 949   | Chronic Obstructive Pulmonary Diseases        |                   |                     |
| 950   | Asthma                                        |                   |                     |
| 951   | Other respiratory                             |                   |                     |
| 952   | Diarrhea (<1 year)                            |                   |                     |
| 953   | Diarrhea ( 1-4 yrs)                           |                   |                     |
| 954   | Diarrhea ( 5 yrs+)                            |                   |                     |
| 955   | Malaria (Clinical diagnosis) (0-4 years)      |                   |                     |
| 956   | Malaria (Clinical diagnosis) (5-14 years)     |                   |                     |
| 957   | Malaria (Clinical diagnosis) (15 yrs+)        |                   |                     |
| 958   | Malaria (Clinical diagnosis) (Pregnant)       |                   |                     |
| 959   | Malaria (Slide or RDT diagnosis) (0-4 years)  |                   |                     |
| 960   | Malaria (Slide or RDT diagnosis) (5-14 years) |                   |                     |
| 961   | Malaria (Slide or RDT diagnosis) (15 yrs +)   |                   |                     |
| 962   | Malaria (Slide or RDT diagnosis) (Pregnant)   |                   |                     |
| 963   | Anemia                                        |                   |                     |
| 964   | Malnutrition (<1 yr)                          |                   |                     |
| 965   | Malnutrition (1-4 yrs)                        |                   |                     |
| 966   | All accidents/injuries                        |                   |                     |

| SL No | Diseases or medical conditions      | Male (discharges) | Female (discharges) |
|-------|-------------------------------------|-------------------|---------------------|
|       |                                     | A                 | B                   |
| 967   | Typhoid                             | _ _ _ _ _ _ _     | _ _ _ _ _ _ _       |
| 968   | TB                                  | _ _ _ _ _ _ _     | _ _ _ _ _ _ _       |
| 969   | Leprosy                             | _ _ _ _ _ _ _     | _ _ _ _ _ _ _       |
| 970   | Meningitis (<1 year)                | _ _ _ _ _ _ _     | _ _ _ _ _ _ _       |
| 971   | Meningitis (1-4 years)              | _ _ _ _ _ _ _     | _ _ _ _ _ _ _       |
| 972   | Meningitis (5 years+)               | _ _ _ _ _ _ _     | _ _ _ _ _ _ _       |
| 973   | Snakebite                           | _ _ _ _ _ _ _     | _ _ _ _ _ _ _       |
| 974   | Skin diseases                       | _ _ _ _ _ _ _     | _ _ _ _ _ _ _       |
| 975   | HIV/AIDS (<5 years)                 | _ _ _ _ _ _ _     | _ _ _ _ _ _ _       |
| 976   | HIV/AIDS (5-14 years)               | _ _ _ _ _ _ _     | _ _ _ _ _ _ _       |
| 977   | HIV/AIDS (15-24 years)              | _ _ _ _ _ _ _     | _ _ _ _ _ _ _       |
| 978   | HIV/AIDS (25 years+)                | _ _ _ _ _ _ _     | _ _ _ _ _ _ _       |
| 979   | TB-HIV Patients                     | _ _ _ _ _ _ _     | _ _ _ _ _ _ _       |
| 980   | Ischemic heart diseases             | _ _ _ _ _ _ _     | _ _ _ _ _ _ _       |
| 981   | Cancer                              | _ _ _ _ _ _ _     | _ _ _ _ _ _ _       |
| 982   | Hypertension                        | _ _ _ _ _ _ _     | _ _ _ _ _ _ _       |
| 983   | Diabetes                            | _ _ _ _ _ _ _     | _ _ _ _ _ _ _       |
| 984   | Other discharges not included above | _ _ _ _ _ _ _     | _ _ _ _ _ _ _       |

**Table 9.3: Family Planning Services Provided**

| SL No | FP Methods and services          | New attendance in facility | Re-attendance in facility | New attendance in Aidpost | Re-attendance in Aidpost |
|-------|----------------------------------|----------------------------|---------------------------|---------------------------|--------------------------|
|       |                                  | A                          | B                         | C                         | D                        |
| 985   | Breast feeding                   | _ _ _ _ _ _ _              | _ _ _ _ _ _ _             | _ _ _ _ _ _ _             | _ _ _ _ _ _ _            |
| 986   | Com. Pill (OCP)                  | _ _ _ _ _ _ _              | _ _ _ _ _ _ _             | _ _ _ _ _ _ _             | _ _ _ _ _ _ _            |
| 987   | Injection                        | _ _ _ _ _ _ _              | _ _ _ _ _ _ _             | _ _ _ _ _ _ _             | _ _ _ _ _ _ _            |
| 988   | Ovulation                        | _ _ _ _ _ _ _              | _ _ _ _ _ _ _             | _ _ _ _ _ _ _             | _ _ _ _ _ _ _            |
| 989   | Condom                           | _ _ _ _ _ _ _              | _ _ _ _ _ _ _             | _ _ _ _ _ _ _             | _ _ _ _ _ _ _            |
| 990   | Loops/IUD                        | _ _ _ _ _ _ _              | _ _ _ _ _ _ _             | _ _ _ _ _ _ _             | _ _ _ _ _ _ _            |
| 991   | T/ligation                       | _ _ _ _ _ _ _              | _ _ _ _ _ _ _             | _ _ _ _ _ _ _             | _ _ _ _ _ _ _            |
| 992   | Vasectomy                        | _ _ _ _ _ _ _              | _ _ _ _ _ _ _             | _ _ _ _ _ _ _             | _ _ _ _ _ _ _            |
| 993   | Referred out to other facilities | _ _ _ _ _ _ _              | _ _ _ _ _ _ _             | _ _ _ _ _ _ _             | _ _ _ _ _ _ _            |

**Table 9.4: Maternal, Neonatal and Child Health Services**

| SL No | Antenatal care | Number        |
|-------|----------------|---------------|
| 994   | First visit    | _ _ _ _ _ _ _ |
| 995   | Fourth visit   | _ _ _ _ _ _ _ |
| 996   | Other          | _ _ _ _ _ _ _ |
| 997   | First dose TT  | _ _ _ _ _ _ _ |
| 998   | Second dose TT | _ _ _ _ _ _ _ |
| 999   | Booster        | _ _ _ _ _ _ _ |

|      | <b>Deliveries</b>                                                | <b>Number</b> |
|------|------------------------------------------------------------------|---------------|
| 1000 | Uncomplicated deliveries in health facility                      | _ _ _ _ _ _ _ |
| 1001 | Deliveries with complications in health facility                 | _ _ _ _ _ _ _ |
| 1002 | Transferred to hospital for pregnancy and delivery complications | _ _ _ _ _ _ _ |
| 1003 | Birth weight <2500 grams                                         | _ _ _ _ _ _ _ |
| 1004 | Still births                                                     | _ _ _ _ _ _ _ |
| 1005 | Born before arrival                                              | _ _ _ _ _ _ _ |
| 1006 | Village births attended (total)                                  | _ _ _ _ _ _ _ |

**Table 9.5 Well Baby Clinic**

| SL Number | Type of service                | New attend    | Re-attend     |
|-----------|--------------------------------|---------------|---------------|
|           |                                | A             | B             |
| 1007      | Clinic Attendances (<1 year)   | _ _ _ _ _ _ _ | _ _ _ _ _ _ _ |
| 1008      | Clinic Attendances (1-4 years) | _ _ _ _ _ _ _ | _ _ _ _ _ _ _ |

**Table 9.6: Immunizations administered**

| Serial No | Vaccine type administered                      | Administered in clinic or in outreach | Administered by Aidposts |
|-----------|------------------------------------------------|---------------------------------------|--------------------------|
|           |                                                | A                                     | B                        |
| 1009      | BCG (Within 24 hours of birth)                 | _ _ _ _ _ _ _                         | _ _ _ _ _ _ _            |
| 1010      | BCG (<1 week but not within 24 hours of birth) | _ _ _ _ _ _ _                         | _ _ _ _ _ _ _            |
| 1011      | BCG (> 1 week)                                 | _ _ _ _ _ _ _                         | _ _ _ _ _ _ _            |
| 1012      | Hepatitis B (Within 24 hours of birth)         | _ _ _ _ _ _ _                         | _ _ _ _ _ _ _            |
| 1013      | Hepatitis B (> 24 hours)                       | _ _ _ _ _ _ _                         | _ _ _ _ _ _ _            |
| 1014      | DTP/Hib (Hep B) (First dose < 1 year)          | _ _ _ _ _ _ _                         | _ _ _ _ _ _ _            |
| 1015      | DTP/Hib (Hep B) (Second dose < 1 year)         | _ _ _ _ _ _ _                         | _ _ _ _ _ _ _            |
| 1016      | DTP/Hib (Hep B) (Third dose < 1 year)          | _ _ _ _ _ _ _                         | _ _ _ _ _ _ _            |
| 1017      | DTP/Hib (Hep B) (> 1 year)                     | _ _ _ _ _ _ _                         | _ _ _ _ _ _ _            |
| 1018      | Sabin Polio Vaccine (First dose < 1 year)      | _ _ _ _ _ _ _                         | _ _ _ _ _ _ _            |
| 1019      | Sabin Polio Vaccine (Second dose < 1 year)     | _ _ _ _ _ _ _                         | _ _ _ _ _ _ _            |
| 1020      | Sabin Polio Vaccine (Third dose < 1 year)      | _ _ _ _ _ _ _                         | _ _ _ _ _ _ _            |
| 1021      | Sabin Polio Vaccine (> 1 year)                 | _ _ _ _ _ _ _                         | _ _ _ _ _ _ _            |
| 1022      | Measles (6-8 months)                           | _ _ _ _ _ _ _                         | _ _ _ _ _ _ _            |
| 1023      | Measles (9-11 months)                          | _ _ _ _ _ _ _                         | _ _ _ _ _ _ _            |
| 1024      | Measles (>1 year)                              | _ _ _ _ _ _ _                         | _ _ _ _ _ _ _            |
| 1025      | Vitamin A (6 months)                           | _ _ _ _ _ _ _                         | _ _ _ _ _ _ _            |
| 1026      | Vitamin A (12 months)                          | _ _ _ _ _ _ _                         | _ _ _ _ _ _ _            |
| 1027      | Vitamin A (>1 year)                            | _ _ _ _ _ _ _                         | _ _ _ _ _ _ _            |

Survey completed at: Hour |\_|\_|\_| Minutes |\_|\_|\_|

Phone number for future contact |\_|\_|\_|\_|\_|\_|\_|\_| |\_|\_|\_|\_|\_|\_|\_|\_|

# BMJ Open

## Readiness of Health Facilities to Provide Emergency Obstetric Care in Papua New Guinea – Evidence from a Cross-Sectional Survey

|                                 |                                                                                                                                                                                                                                                                                                                                    |
|---------------------------------|------------------------------------------------------------------------------------------------------------------------------------------------------------------------------------------------------------------------------------------------------------------------------------------------------------------------------------|
| Journal:                        | <i>BMJ Open</i>                                                                                                                                                                                                                                                                                                                    |
| Manuscript ID                   | bmjopen-2021-050150.R3                                                                                                                                                                                                                                                                                                             |
| Article Type:                   | Original research                                                                                                                                                                                                                                                                                                                  |
| Date Submitted by the Author:   | 25-Jan-2022                                                                                                                                                                                                                                                                                                                        |
| Complete List of Authors:       | Hou, Xiaohui ; World Bank Group, Health, Nutrition and Population Global Practice<br>Khan, M. Mahmud ; University of Georgia College of Public Health<br>Pulford, Justin; Liverpool School of Tropical Medicine, ; Papua New Guinea Institute of Medical Research,<br>Saweri, Olga; Papua New Guinea Institute of Medical Research |
| <b>Primary Subject Heading</b>: | Obstetrics and gynaecology                                                                                                                                                                                                                                                                                                         |
| Secondary Subject Heading:      | Global health, Health policy, Health services research, Obstetrics and gynaecology                                                                                                                                                                                                                                                 |
| Keywords:                       | OBSTETRICS, International health services < HEALTH SERVICES ADMINISTRATION & MANAGEMENT, Quality in health care < HEALTH SERVICES ADMINISTRATION & MANAGEMENT, Health policy < HEALTH SERVICES ADMINISTRATION & MANAGEMENT, Maternal medicine < OBSTETRICS                                                                         |
|                                 |                                                                                                                                                                                                                                                                                                                                    |

SCHOLARONE™  
Manuscripts



I, the Submitting Author has the right to grant and does grant on behalf of all authors of the Work (as defined in the below author licence), an exclusive licence and/or a non-exclusive licence for contributions from authors who are: i) UK Crown employees; ii) where BMJ has agreed a CC-BY licence shall apply, and/or iii) in accordance with the terms applicable for US Federal Government officers or employees acting as part of their official duties; on a worldwide, perpetual, irrevocable, royalty-free basis to BMJ Publishing Group Ltd ("BMJ") its licensees and where the relevant Journal is co-owned by BMJ to the co-owners of the Journal, to publish the Work in this journal and any other BMJ products and to exploit all rights, as set out in our [licence](#).

The Submitting Author accepts and understands that any supply made under these terms is made by BMJ to the Submitting Author unless you are acting as an employee on behalf of your employer or a postgraduate student of an affiliated institution which is paying any applicable article publishing charge ("APC") for Open Access articles. Where the Submitting Author wishes to make the Work available on an Open Access basis (and intends to pay the relevant APC), the terms of reuse of such Open Access shall be governed by a Creative Commons licence – details of these licences and which [Creative Commons](#) licence will apply to this Work are set out in our licence referred to above.

Other than as permitted in any relevant BMJ Author's Self Archiving Policies, I confirm this Work has not been accepted for publication elsewhere, is not being considered for publication elsewhere and does not duplicate material already published. I confirm all authors consent to publication of this Work and authorise the granting of this licence.

1  
2  
3  
4  
5  
6  
7  
8  
9  
10  
11  
12  
13  
14  
15  
16  
17  
18  
19  
20  
21  
22  
23  
24  
25  
26  
27  
28  
29  
30  
31  
32  
33  
34  
35  
36  
37  
38  
39  
40  
41  
42  
43  
44  
45  
46  
47  
48  
49  
50  
51  
52  
53  
54  
55  
56  
57  
58  
59  
60

1  
2  
3  
4  
5  
6  
7  
8  
9

**Readiness of Health Facilities to Provide Emergency Obstetric Care in Papua New Guinea – Evidence from a Cross-Sectional Survey**

For peer review only



1  
2  
3 1 **Readiness of Health Facilities to Provide Emergency Obstetric Care in Papua New Guinea -**  
4 2 **Evidence from a Cross-Sectional Survey**

6 3  
7 4 **Xiaohui Hou, Ph.D.**

8 5 Health, Nutrition, and Population Global Practice  
9 6 World Bank  
10 7 1818 H. Street. NW, 20433  
11 8 Washington DC  
12 9 [xhou@worldbank.org](mailto:xhou@worldbank.org)  
13  
14  
15  
16  
17

18 12 **M. Mahmud Khan, Ph.D.**

19 13 Health Policy and Management Department  
20 14 College of Public Health  
21 15 University of Georgia  
22 16 Wright Hall, Health Sciences Campus, 100 Foster Road, Athens, GA 30602  
23 17 [Mahmud.Khan@uga.edu](mailto:Mahmud.Khan@uga.edu)  
24  
25  
26

27 19 **Justin Pulford, Ph.D.**

28 20 Senior Lecturer  
29 21 Department of International Public Health  
30 22 Liverpool School of Tropical Medicine  
31 23 [justin.pulford@lstm.ac.uk](mailto:justin.pulford@lstm.ac.uk)  
32  
33  
34  
35

36 25 **Olga P. M. Saweri, MSc**

37 26 Papua New Guinea Institute of Medical Research (PNGIMR)  
38 27 PO Box 60, Goroka, EHP 441, Papua New Guinea  
39 28 [olga.saweri@gmail.com](mailto:olga.saweri@gmail.com)  
40  
41

42 30 Declarations of interest: none

43 31 Corresponding Author: M. Mahmud Khan, Ph.D., Professor, Health Policy and Management,  
44 32 College of Public Health, University of Georgia, 100 Foster Road, Wright Hall 116, Athens, GA  
45 33 30602. [Mahmud.Khan@uga.edu](mailto:Mahmud.Khan@uga.edu)  
46  
47

48 35 **Key words**

49  
50 36 Maternal Health, Emergency Obstetric Care, Readiness of health facilities, signal functions for  
51  
52 37 emergency obstetric care, Papua New Guinea  
53  
54

55 38 Total word count: 5,350 (excluding references, figures and tables)  
56  
57

## Contributorship statement

**Xiaohui Hou:** Conceptualization, Methodology, Supervision, Project Administration, Resources, Writing-Original Draft, Writing – review & editing

**M. Mahmud Khan:** Conceptualization, Methodology, Supervision, Formal Analysis, Writing-Original Draft, Writing – review & editing

**Justin Pulford:** Conceptualization, Methodology, Data Curation, Data Validation, Writing-Review & Editing.

**Olga P. M. Saweri:** Data Curation, Data Validation, Writing-Review & Editing

## Details of funding source

This work was funded by World Bank's Trust Fund supported by Australia's Department of Foreign Affairs and Trade. World Bank contract number: 7171956, Principal Investigator: M. Mahmud Khan. Date: July 1, 2014.

## Data availability statement

No additional data is available. Researchers interested in 2015 PNG Facility Assessment Survey data can contact Dr. Xiaohui Hou at [xhou@worldbank.org](mailto:xhou@worldbank.org) and copy the PI of the project, Dr. M. Mahmud Khan, at the email address [Mahmud.Khan@uga.edu](mailto:Mahmud.Khan@uga.edu), with a statement on the reasons for requesting the dataset and types of analyses to be conducted.

## Competing Interest statement

There is no competing interest.

## 1 **Abstract**

### 2 **Objective**

3 To measure readiness of health facilities in Papua New Guinea (PNG) to provide obstetric care  
4 and other maternal health services.

### 5 **Design**

6 Cross-sectional study involving random sample of health centers, district/rural hospitals (levels 3  
7 and 4 facilities) and all upper level hospitals operational at the time of survey. Structured  
8 questionnaires were used to collect data from health facilities.

### 9 **Setting**

10 Health facilities in PNG. Facility administrators and other facility personnel were interviewed.  
11 Number of facility personnel interviewed was usually one for health centers and two or more for  
12 hospitals.

### 13 **Participants**

14 19 upper-level facilities (levels 5-7, provincial, regional and national hospitals) and 60 lower-level  
15 facilities (levels 3 and 4, health centers and district/rural hospitals)

### 16 **Outcome measures**

17 Four service-types were used to understand readiness of surveyed health facilities in the  
18 provision of maternity care including obstetric care services: (1) facility readiness to provide  
19 clinical services; (2) availability of family planning items; (3) availability of maternal and neonatal  
20 equipment and materials; and (4) ability to provide emergency obstetric care.

### 21 **Results**

22 56% of lower level facilities were not able to provide Basic Emergency Obstetric Care (BEmOC).  
23 Even among higher level facilities, 16% were not able to perform one or more of the functions  
24 required to be considered a BEmOC provider. 11% of level 3 and 4 health facilities were able to  
25 provide comprehensive emergency obstetric care (CEmOC) as compared to 83% of higher level  
26 facilities.

### 27 **Conclusion**

28 Given the high fertility rate and maternal mortality ratio (MMR) in PNG, lack of BEmOC at the  
29 first level inpatient service providers is a major concern. To improve access to EmOC, level 3 and  
30 4 facilities should be upgraded to at least BEmOC providers. Significant reduction in MMR will  
31 require improved access to CEmOC and optimal geographic location approach can identify  
32 facilities to be upgraded.

33

### Strengths and limitations of this study

- This is the first empirical study that systematically examined availability of maternity care in health facilities in Papua New Guinea (PNG).
- All upper level hospitals and randomly selected fully functional health centers were surveyed.
- The readiness of facilities in the provision of obstetric care and actual provision of services were assessed using relevant indicators and signal functions.
- Service availability and readiness of facilities could not be linked with community level health outcomes.
- The sampling design selected fully functional health centers and district/rural hospitals in each of the surveyed districts implying overestimation of readiness and availability of obstetric care.

## 1 Introduction

2 Effective antenatal, neonatal and Emergency Obstetric Care (EmOC) are highly cost-effective  
3 interventions vital to avert common adverse pregnancy and/or birth outcomes, which  
4 significantly contribute to maternal mortality in poor resource settings.<sup>1-4</sup> Basic Emergency  
5 Obstetric Care (BEmOC) alone can avert a significant proportion of maternal deaths and up to 40%  
6 of neonatal deaths.<sup>5</sup> A global assessment found that BEmOC facilities are consistently not  
7 available in sufficient numbers in countries with high and moderate levels of maternal mortality.<sup>6</sup>  
8 Comprehensive Emergency Obstetric Care (CEmOC) availability, which includes the provision of  
9 caesarean and blood transfusion services in addition to the key functions included in BEmOC, is  
10 also quite poor in many low and middle income countries.<sup>7</sup>

11 Maternal and child health remains a key priority area in Papua New Guinea (PNG);<sup>8</sup> however,  
12 persistently high maternal and neonatal deaths reflect numerous deficiencies. The estimates of  
13 Maternal Mortality Ratio (MMR) in PNG vary considerably. One study by Mola and Kirby  
14 estimated the MMR for 2009 using facility-based health information system records and survey  
15 data on maternal mortality among unsupervised births from one province. The estimates imply  
16 that the average MMR in PNG should be approximately 500 per 100 000 live births.<sup>9 10</sup> The  
17 neonatal mortality in PNG is also high, around 28 per 1000 live births.<sup>11</sup> The World Health  
18 Organization model ranks PNG 130<sup>th</sup> in the world in terms of MMR.<sup>12</sup> The 2016-2018 PNG  
19 Demographic and Health Survey (DHS), using the sisterhood method, found that the MMR was  
20 about 205 per 100,000 live births.<sup>13</sup> Even though new DHS estimate represents a significant  
21 improvement from the previous estimate of 733 per 100,000 live births in 2006, the maternal  
22 mortality in PNG remains about 24 times the MMR in neighboring Australia.<sup>12</sup> The DHS report  
23 also indicates that only 17% of pregnancies received a prenatal visit in the first trimester and 49%  
24 had four or more prenatal visits over the whole pregnancy. During 2012-2017, about 55% of  
25 deliveries in PNG were supervised by trained health workers at health facilities<sup>13</sup> indicating  
26 limited access to modern maternal health care services.

27 To reduce the MMR in any country, it is important to understand the causes of death so that  
28 appropriate interventions can be designed and adopted. In PNG, the maternal mortality registry  
29 often does not report causes of death. Reviewing the causes of deaths mentioned in the general  
30 death registry and in maternal mortality registry, one study in early 1980s found that the main  
31 causes were puerperal sepsis, postpartum hemorrhage, medical and surgical complications,  
32 prolonged or obstructed labor, ruptured uterus, deaths associated with caesarean section.<sup>14</sup> It is  
33 likely that many of these causes of deaths have remained important even today. Clearly, deaths  
34 due to the causes indicated above cannot be avoided without timely access to health facilities  
35 that are equipped to provide a range of obstetric care services. A recent article mentioned  
36 geographically dispersed population, shortage of health care providers, poverty, gender  
37 inequality and low level of education as important determinants of maternal deaths.<sup>15</sup> These  
38 aspects are, however, directly related to access to care and readiness of health facilities in the  
39 provision of maternity care.

1  
2  
3 1 Lifetime risk of maternal death depends on the probability of maternal death per pregnancy and  
4 2 the average number of pregnancies per woman over the reproductive age. The 2016-2018 PNG  
5 3 DHS estimated that total fertility rate (TFR) was about 4.2 per woman, which is slightly lower than  
6 4 the TFR of 4.4 in 2006. Access to obstetric care and lifetime risk of maternal death can be  
7 5 improved by lowering the TFR as well.  
8  
9

10 6 Given the critical importance of timely access to appropriate obstetric care, it is essential to  
11 7 assess the ability and readiness of health facilities in the provision of emergency obstetric care in  
12 8 PNG. Due to high TFR of PNG, the demand for maternal health services will continue to increase  
13 9 rapidly, underscoring the urgent need for improving access to care and strengthening maternal  
14 10 healthcare service delivery.  
15  
16

17 11 Despite the high social value of maternal and newborn health care services in PNG, no macro-  
18 12 level information is available on the ability or readiness of health facilities in the provision of the  
19 13 services. One recent study assessed the capacity of 21 health facilities in the provision of essential  
20 14 surgery and anesthesia services.<sup>16</sup> No study on PNG, to date, has examined the readiness and  
21 15 ability of health facilities at the national level in the provision of obstetric care services. This study  
22 16 is the first attempt to understand the state of obstetric care availability in PNG.  
23  
24  
25

26 17 The principal objective of this study is to measure health facility readiness to provide obstetric  
27 18 care and other maternal health services. Some of the measures reflect not only the readiness of  
28 19 the facilities in the provision of target services but also the quality of services offered. The  
29 20 nationally representative health facility survey allows measurement of various indicators of  
30 21 obstetric care services. These measures will be useful for policy makers to reform the health care  
31 22 delivery system to strengthen the provision of obstetric care and general clinical services.  
32  
33  
34

## 35 23 **Methods**

### 36 24 *Conceptual Framework*

37 25 We use the Donabedian's framework to analyze the readiness of obstetric care and other related  
38 26 services offered through the health facilities in PNG. In general, the Donabedian's approach is  
39 27 used to evaluate quality of care by analyzing relevant structures, processes and outcomes.<sup>17</sup> The  
40 28 structure measures affect processes and then processes affect outcomes, as shown in figure 1.  
41 29 In this study, our focus is on the evaluation of 'structure' and 'process' measures relevant for  
42 30 maternity care. The structure and process variables help to better understand the ability of  
43 31 health facilities in the provision of different service-types. Although, the impact of service  
44 32 provision cannot be directly measured from the facility survey data, country-level estimates of  
45 33 maternal mortality and morbidity imply relatively poor outcomes indicating the need for  
46 34 improving infrastructure and processes associated with obstetric and other maternity services.  
47  
48  
49  
50  
51

52 35 To evaluate the ability and readiness to provide general medical care services including obstetric  
53 36 care, health facilities should have several infrastructural characteristics and resources. Some of  
54 37 the structural measures are quite general, related to the provision of any clinical service, such as  
55  
56  
57  
58  
59  
60

1  
2  
3 1 general inpatient services. In addition, specific personnel, supplies and drugs must be available  
4 2 at the facility to be able to offer the right type of services at the right time based on the clinical  
5 3 needs of patients. The structural characteristics, although not directly related to maternity care,  
6 4 are the necessary aspects defining the “readiness” of the facility in the provision of effective  
7 5 health care services. Readiness, however, does not necessarily imply actual provision of services.  
8 6 The infrastructural aspects act as the foundation for the provision of services, and relevant health  
9 7 care resources must be combined with the infrastructure to offer services to patients whenever  
10 8 needed. The process variables reflect ability to offer different types of obstetric care services and  
11 9 functions. The process variables for monitoring obstetric care service provision, the signal  
12 10 functions, are well defined and we will use the facility-level signal functions for understanding  
13 11 the readiness of facilities in PNG.<sup>18</sup>

### 12 *Study Setting*

13 PNG is remarkably diverse with respect to geography, language, and infrastructure. The country  
14 14 is divided into 22 provinces across four regions (Highlands, Momase and Southern, and the New  
15 15 Guinea Islands). Most of the country’s 8 million people live in rural or peri-urban communities  
16 16 and are faced with significant challenges with regard to equitable access to health, education and  
17 17 economic opportunities.

18 PNG has a government-funded health system throughout much of the country. It is  
19 19 supplemented by government-subsidized health services provided by various Christian missions.  
20 20 Overall, it is estimated that churches provide 47% of primary health services, particularly in rural  
21 21 areas.<sup>19</sup>

22 Health facilities are categorized by the number and cadre of health workers employed and the  
23 23 services they provide and are detailed in the National Health Services Standard (NHSS) of the  
24 24 Government of PNG (GoPNG).<sup>20</sup> The levels of health facilities in PNG are numbered 1 through 7,  
25 25 where levels 1 and 2 provide basic primary health care, specifically outpatient services only. Level  
26 26 3 health facilities, or health centers, provide outpatient and basic inpatient services for deliveries  
27 27 and minor ailments requiring observation. Level 4 health facilities, district and rural hospitals,  
28 28 provide general admissions, limited clinical support services including basic pharmacy and  
29 29 laboratory services, and depending on the employment of a medical officer, may provide surgical  
30 30 intervention services. Levels 5 to 7 health facilities provide secondary and tertiary health services  
31 31 as well as clinical support services, including pharmacy, laboratory, and radiology. The only level  
32 32 7 health facility, the Port Moresby General Hospital, is the largest and most advanced health care  
33 33 facility of PNG, employs the largest concentration of health care workers and provides  
34 34 comprehensive health care services.

### 35 *Survey Design*

36 We conducted a health facility survey of 73 health facilities in PNG in 2015. All operational upper  
37 37 level health facilities (levels 5 to 7) were selected for the survey. At the time of data collection,



1 PNG had 19 upper-level health facilities and all these 19 facilities were surveyed (although one  
2 of the facilities was not fully operational). The upper-level health facilities in the survey included  
3 the national referral hospital (Port Moresby General Hospital), three regional hospitals, and 15  
4 provincial hospitals. At the national level, since about half of health centers and district/rural  
5 hospitals (levels 3 and 4) were Church-run, the survey design intended to sample equal number  
6 of publicly-run and Church-run facilities. For selecting facilities at these two levels, between six  
7 (New Guinea Islands) and eight (Southern, Highlands, and Momase) districts were randomly  
8 selected per region. The largest government- and Church-administered health facilities (one of  
9 each type based on outpatient numbers per annum as reported by the National Health  
10 Information System) were purposely selected per district. This sampling procedure allowed  
11 selection of 30 publicly run and 30 church-run facilities from the selected districts; however,  
12 during field visits, not all selected facilities were found to be operational. Where possible, closed  
13 health facilities were replaced by functional ones within the same district. In some districts there  
14 were no functional level 3 or 4 facilities, resulting in less than 60 facilities surveyed (N=54). Figure  
15 2 shows the location of the health facilities surveyed for this study. The provinces shaded in green  
16 indicate where the survey was carried out. The red squares represent level 5 to 7 health facilities,  
17 while the blue squares represent levels 3 and 4.

### 18 *Survey Procedure*

19 The survey comprised of a health facility assessment and costing instrument as well as interviews  
20 with healthcare providers, inpatients, and outpatients. Each instrument is detailed in the survey  
21 report.<sup>21</sup> The facility assessment questionnaire can be found in the supplementary file of the  
22 article and standard health facility questionnaires were adapted to the PNG context using the  
23 NHSS document.<sup>20</sup> Briefly, the health facility assessment collected information on various  
24 operational aspects of each health facility, while the costing instrument detailed expenditure on  
25 human resources, equipment, and consumables utilized for the provision of healthcare services.  
26 Both these instruments were completed with health facility managers and administrators. Upper  
27 level facilities offered many different types of specialized services and data collection at these  
28 levels required interviewing multiple facility personnel. The data collection was done by a team  
29 of 5 trained enumerators, who spent three to five days surveying each health facility. In total, 73  
30 health facilities were surveyed.

### 31 *Informed consents for the survey*

32 For health facility costing and assessment, the survey team requested consent via email from the  
33 provincial, district and church health services, depending upon the facility to be surveyed. In  
34 addition, consent was requested from the officer in charge of each of the health facilities. The  
35 travel plan to the facilities was finalized after the consents were granted. Upon the team's arrival  
36 in the facility, the supervisor of the team met the officer in charge to confirm the consent  
37 received earlier and to get verbal consent to initiate the interviews.



1  
2  
3 1 For interviews with health care workers and patients, informed consent was requested in writing.  
4 2 The interviews were conducted only after the consents were granted. As much as possible, visual  
5 3 and audible privacy was ensured for the interviews. All interview questionnaires were de-  
6 4 identified by assigning a code number. The code numbers are saved on a secure server at the  
7 5 PNGIMR.  
8  
9

#### 10 6 *Public Involvement*

11  
12 7 Stakeholder consultations were involved in the design and early dissemination of this research.  
13 8 During the feasibility stage, priority of research questions, choice of outcome measures, and  
14 9 methods were informed by discussions with stakeholders involving representatives from the  
15 10 National Department of Health, UN agencies, academics and other development partners in  
16 11 PNGs. The preliminary findings were also discussed with representatives from the National  
17 12 Department of Health, Provincial Health Authorities, hospitals and development partners in a  
18 13 stakeholder consultation workshop held in Port Moresby, PNG.  
19  
20  
21

#### 22 14 *Ethics approval*

23  
24 15 The study was approved by the PNG Institute of Medical Research (IMR) Institutional Review  
25 16 Board (IRB) and the PNG Medical Research Advisory Committee (MRAC). The following approval  
26 17 numbers were allocated to the study: IRB No. 1414, 7 August 2014; MRAC No 14.26, 10  
27 18 November 2014.  
28  
29

#### 30 19 *Outcome measures*

31  
32 20 The handbook on monitoring emergency obstetric care<sup>18</sup> identified a set of indicators to measure  
33 21 availability, access and provision of EmOC in a country or a region. Two types of measures were  
34 22 defined -the first type focuses on availability, adequate coverage and utilization of services at  
35 23 national or sub-national levels and the second type measures obstetric care related functions  
36 24 performed by health facilities. The functions identified to define the level of EmOC services  
37 25 offered from a health facility are: (1) Administer parenteral antibiotics, (2) Administer uterotonic  
38 26 drugs, (3) Administer parenteral anticonvulsants, (4) Manually remove the placenta, (5) Remove  
39 27 retained products, (6) Perform assisted vaginal delivery, (7) Perform basic neonatal resuscitation,  
40 28 (8) Perform surgery (e.g., caesarean section), and (9) Perform blood transfusion. When a facility  
41 29 can perform all the functions listed under 1-7, it is considered a Basic EmOC (BEmOC) provider  
42 30 while ability to perform all the nine functions defines the comprehensive EmOC (CEmOC)  
43 31 provider. This study has used these nine measures to categorize health facilities as either a  
44 32 BEmOC or a CEmOC. Note that all these signal functions are defined by the ability to perform  
45 33 specific functions pregnant women need at the time of delivery. Ability to perform the functions  
46 34 does not necessarily imply that the facilities actually provided the services in the recent past.  
47  
48  
49  
50  
51

52  
53 35 Since this study is based on facility-level survey data, community or patient related health  
54 36 outcome measures are not directly observable. To compensate for this, we have used additional  
55 37 measures to understand readiness of health facilities in the provision of general inpatient care.  
56  
57

1  
2  
3 1 Availability of basic medical equipment and supplies and physical condition of the facility  
4 (infrastructural variables) may affect willingness of clients to utilize services from the facilities.  
5 2  
6 3 Another important intervention that may affect the demand for EmOC is the provision of family  
7 4 planning services. Family planning in PNG is expected to reduce total fertility rate implying that  
8 5 need for maternity services should decline with family planning. Therefore, in addition to nine  
9 6 EmOC functions listed above, other outcome variables considered in this analysis are: (a)  
10 7 readiness of facilities to provide clinical services; (b) availability of family planning items; and (c)  
11 8 availability of maternity care related equipment and materials. Availability of drugs and supplies  
12 9 is defined as having the item in stock at the time of the survey.

13  
14  
15  
16 10 For the availability of equipment, instruments and supplies, several indexes were calculated to  
17 11 indicate degree of availability of the items. The index values range from 0 to 100, 100 implying  
18 12 that all the items used for the construction of the index were available in all the facilities surveyed.

### 13 *Calculating readiness or availability index*

14  
15  
16  
17 14 The analysis has used facility level data to derive the readiness indicators and ability to perform  
18 15 signal functions for each facility in the survey (Stata version 12 was used). The results are  
19 16 presented as descriptive tables (Tables 1-4) to indicate the proportion of facilities having the  
20 17 instruments or able to perform the specific functions.

21  
22  
23  
24  
25  
26  
27  
28 18 An equally weighted index was constructed based on the availability of the items included in each  
29 19 of the categories of service delivery. It reflects the percent of all readiness aspects or variables  
30 20 satisfied by the health facilities in a specific category. For example, if a facility reports having an  
31 21 instrument, a value of 1.0 was assigned for the facility for that equipment. The availability index  
32 22 was constructed to show the percent of listed equipment and items available in each of the  
33 23 facility categories. For example, if the family planning items availability index is 65 for level 3 and  
34 24 4 facilities, it means that the facilities on the average had 65% of all the family planning  
35 25 equipment and items considered in the analysis.

## 36 **Results**

### 37 *Facility readiness to provide clinical services*

38  
39  
40  
41  
42  
43  
44 28 Table 1 reports facility readiness in the provision of services. As shown, 95% (18 out of 19) of  
45 29 level 5 to 7 facilities were connected to the main electric supply grid but only about a third of  
46 30 level 3 and 4 facilities (17 out of 54). However, more than 80% of all facilities connected to the  
47 31 electric supply experienced blackout at least for some time in the week before the survey. All  
48 32 level 5 to 7 facilities had functional backup generators, while the percentage of level 3 and 4  
49 33 facilities with backup generators was 76% for church-run facilities and 48% for public facilities.  
50 34 Half of the level 3 and 4 facilities with backup generators reported problems in operating the  
51 35 generator in the previous month.

52  
53  
54  
55 36 If supply line and water tanks are considered, all level 5 to 7 facilities and 83% of level 3 and level  
56 37 4 public health facilities and 84% of level 3 and level 4 church health facilities reported having

1  
2  
3 1 access to water on the day of the survey. However, less than 10% of level 3 and 4 facilities were  
4 2 connected with water supply lines. Only 45% of level 3 and 4 public facilities had water  
5 3 connection to the delivery room (and water availability on the day of the survey) compared to 72%  
6 4 at church-run facilities.

7  
8  
9 5 A significant share of health facilities, 62%, 44% and 38% of level 3 and 4 public, level 3 and 4  
10 6 church, and level 5 and 6 facilities, respectively, experienced water shortages in 2014. The survey  
11 7 asked facility respondents whether the facility was responsible for maintaining the water supply  
12 8 system and it was observed that about 45% of public level 3-4 facilities were responsible for  
13 9 maintaining the water supply system. The proportions were 64% for church-run level 3 and 4  
14 10 facilities and 68% for level 5 to 7 facilities.

15  
16  
17 11 Only 10% public (n=3) and 12% church (n=3) level 3 and 4 health facilities had ability to do direct  
18 12 blood transfusion. Proportion of facilities which could do blood transfusion was much higher, 89%  
19 13 among level 5 and 6 facilities and 100% for level 7. Percentage of health facilities that had  
20 14 operations theatre were much higher. 28% and 36% level of public and church level 3-4 health  
21 15 facilities and all level 5-7 health facilities had at least one operation theatre.

22  
23  
24 16 Both level 3 and 4 public and church-run health facilities show low readiness score for service  
25 17 delivery (Table 1). Readiness indexes were 40.3 for level 3 and 4 public sector facilities, 48.6 for  
26 18 level 3 and 4 church-run facilities, 84.6 for level 5 and 6 facilities, and 100 for the level 7 facility.

### 27 19 *Availability of Family Planning Items*

28  
29  
30 20 Table 2 presents the availability of family planning products and supplies in surveyed health  
31 21 facilities. The availability index of family planning items was 81.6 for level 3 and 4 public sector  
32 22 health facilities, 84.0 for level 3 and 4 church-run facilities, and 88.9 for level 5 and 6 facilities.  
33 23 Non-availability of family planning injections in the level 7 facility reduced the overall index of  
34 24 family planning item availability for the facility to 66.7. Since there is only one facility at level 7,  
35 25 non-availability of even a single item significantly reduces the overall index.

### 36 26 *Availability of supplies and equipment for maternity care*

37  
38  
39 27 A relatively large proportion of health facilities lacked very basic pregnancy and antenatal care  
40 28 related supplies and equipment as shown in table 3. The index values for the availability of  
41 29 antenatal care items were 76.9 and 88.6 for level 3 and 4 public- and Church-run facilities,  
42 30 respectively. The index was 87.3 for level 5 and 6 facilities and 100 for level 7 facility. The index  
43 31 of availability of obstetric and neonatal care items were worse in level 3 and level 4 facilities, 70.6  
44 32 and 80.5 respectively for public and church facilities. The index was 95.52 for level 5 and 6  
45 33 facilities. The survey also asked about the availability of vacuum extractors and forceps in the  
46 34 facilities for conducting deliveries. It is interesting that 74% of facilities reported having vacuum  
47 35 extractors and 95% reported having forceps although forceps are not used in PNG for deliveries.

### 48 36 *Ability to provide emergency obstetric care services*

1  
2  
3 1 Table 4 indicates the percent of facilities able to perform different obstetric functions. As  
4 2 mentioned earlier, WHO has defined nine functions to understand the level of obstetric services  
5 3 provided from the facilities. The survey questionnaire combined first three signal functions  
6 4 (capacity to administer parenteral antibiotics, uterotonic drugs, parenteral anticonvulsants) into  
7 5 one and asked the respondents to report if the facility was able to perform all the three functions,  
8 6 two of the three or one of the three functions. Most level 3-4 facilities, about 80% (n=42),  
9 7 reported the ability to perform all these three functions. Two facilities at upper levels (levels 5-  
10 8 7) were not able to perform these three basic obstetric functions. One of the upper level facilities  
11 9 in the sample was not fully functional at the time of the survey. Table 4 shows that 38% of Church-  
12 10 run level 3-4 facilities and 52% of government-run level 3-4 facilities were BEmOC providers. Even  
13 11 among higher level facilities (levels 5, 6 and 7), 11% (n=2) of facilities were not able to perform  
14 12 one or more of the necessary functions required to be considered a BEmOC provider.

15 13 If the signal functions for comprehensive emergency obstetric care are considered (all nine signal  
16 14 functions), only about 11% (n=6) of level 3 and 4 health facilities were found to be CEmOC units.  
17 15 About 15% of level 3 and 4 facilities had the capacity to manage a caesarean section or do blood  
18 16 transfusion. Not all level 5 to 7 facilities were CEmOC providers – 21% (n=4) of upper level  
19 17 facilities were not able to perform at least one of the nine signal functions.

## 20 18 **Discussion**

21 19 The overall health facility infrastructural condition in PNG is quite poor. Most facilities reported  
22 20 the need for major building repairs and emphasized the lack of adequate toilets, stable electrical  
23 21 supply, and consistent water supply. Many level 3 and 4 health facilities required better  
24 22 connectivity to electricity and clean water supply. One significant concern is the number of health  
25 23 facilities that did not have running water in the facility's delivery room. The quantity and quality  
26 24 of different types of clinical services provided crucially depends on the facility's readiness to offer  
27 25 services in general. Overall, level 3 and 4 facilities, both public and Church-run, scored low on the  
28 26 readiness index, implying that these facilities were not very reliable providers of services and  
29 27 patient-confidence in these facilities are likely to be low. The survey also revealed the need for  
30 28 improving the supply of basic medical items at level 3 and 4 public health facilities. Level 3 and 4  
31 29 public facilities show lower availability of different medical items compared to those in Church-  
32 30 run facilities.

33 31 Comparison of health facility readiness across countries is often tricky because of differences in  
34 32 the level and comprehensiveness of facilities in different countries of the world. A World Bank  
35 33 report<sup>22</sup> indicates that 98% of public hospitals in Indonesia had electricity; in Laos, the index of  
36 34 basic amenities was reported as 64%<sup>23</sup> compared to 58% for PNG (weighted mean of the values  
37 35 in table 1).

38 36 This study showed that the index of availability of family planning supplies in levels 3 and 4 was  
39 37 about 83%. Family planning supplies should be available in all facilities, especially at the lower  
40 38 levels, to ensure uninterrupted access at all times, which is clearly not the case for PNG. In

1  
2  
3 1 addition, availability of family planning supplies does not necessarily mean utilization of services.  
4 2 The findings from the most recent PNG DHS survey showed access to family planning services  
5 3 quite limited. One quarter of currently married women have an unmet need for family planning,  
6 4 and only 59% of currently married women are satisfied with family planning services. Among  
7 5 those who have received family planning, about 9 in 10 users obtained their modern family  
8 6 planning supplies from a public (government) source. Therefore, there is an urgent need to  
9 7 identify potential gaps in the provision and utilization of family planning services to strengthen  
10 8 service provision from the government health facilities, especially at lower levels. Better access  
11 9 and utilization of family planning services can help reduce maternal and child mortality.<sup>24-26</sup>  
12  
13  
14  
15

16 10  
17 11 While 79% of level 5 to 7 facilities were found to be CEmOC providers, the fact that about a fifth  
18 12 were not able to provide comprehensive emergency obstetric care is a major concern, given that  
19 13 these are the higher level referral hospitals in PNG. Consistent with the findings of this study,  
20 14 another study using a much smaller sample of facilities, concluded that the "Capacity for essential  
21 15 surgery and anesthesia services is severely limited in PNG due to shortfalls in physical  
22 16 infrastructure, human resources, and basic equipment and supplies."<sup>16</sup>  
23  
24

25 17 The results from the survey can be used to derive national level estimates of obstetric care  
26 18 availability. Using the proportions of CEmOC facilities at different levels and the total number of  
27 19 facilities in PNG at these levels, the total number of facilities ready to provide comprehensive  
28 20 obstetric care was only 50 at the time of the survey in 2015. Even if we arbitrarily assume  
29 21 balanced geographic distribution of these facilities, an emergency obstetric case will have to  
30 22 travel 53 km each way, on average, to reach a CEmOC facility. The distance to the nearest CEmOC  
31 23 facility is so large that for many emergency cases this is virtually synonymous of not having access  
32 24 to CEmOC. To reduce maternal mortality and morbidity significantly, it is essential to lower the  
33 25 average distance to the nearest CEmOC facility<sup>27</sup> implying that PNG will have to upgrade a  
34 26 significant number of levels 3, 4 and 5 facilities. Geographic information systems and  
35 27 geographical modelling tools can help identify the optimal location of CEmOC facilities and  
36 28 existing facilities closest to the optimal locations can be upgraded in the short-run to improve  
37 29 access.<sup>28</sup>  
38  
39  
40  
41  
42

43 30 All facilities at level 3 or above should be able to provide basic EmOC. To improve access to  
44 31 emergency obstetric care, most level 3 and 4 facilities should be considered for immediate  
45 32 upgrading to BEmOC provider or better. The survey of facilities indicated that about 45% of levels  
46 33 3 and 4 facilities were not ready to provide BEmOC. Despite this low readiness, equipping about  
47 34 15 to 20% of these facilities to perform signal functions 5 and 6 can improve BEmOC availability  
48 35 from 55% of the facilities to about 80%. Although maternal and child health is a priority area,  
49 36 PNG has not allocated enough resources to achieve improved access to maternity and neonatal  
50 37 services. PNG spends more than 4.3% of its GDP on health (about \$109 per capita in PPP dollars).  
51 38 Total health expenditure is not low compared to other countries with similar level of per capita  
52 39 income.<sup>29</sup> However, a significant part of health resources, including human resources, particularly  
53 40 doctors, are concentrated in a few major hospitals. Therefore, the resource allocation at the  
54  
55  
56  
57  
58  
59  
60



1  
2  
3 1 lower level health facilities (level 3 and level 4 facilities) are not sufficient. Reallocation of public  
4 2 sector resources to lower level health facilities are needed to expand access to obstetric care and  
5 3 other preventive services.

6  
7  
8 4 To improve availability and access to quality maternity services in PNG, especially in remote rural  
9 5 areas, a program of training and upskilling of Community Health Workers was adopted.<sup>30</sup>  
10 6 Although the upskilling has increased utilization of basic maternity services, significant reductions  
11 7 in maternal mortality will require access to hospital-based obstetric care. Government of PNG  
12 8 may consider allocating funds to facilities, both public and church facilities, based on quantities  
13 9 of priority health services delivered rather than on number and mix of human resources and  
14 10 other administrative needs.<sup>31</sup> While the effectiveness of such performance based financing  
15 11 depend on how the schemes are implemented, evidence in low and middle income countries  
16 12 shows that the performance can be improved through financial incentives.<sup>32</sup> From the demand  
17 13 side, past research has found that providing pregnant women with health vouchers to ensure  
18 14 financial protection for accessing medical care has increased utilization of health services.<sup>33</sup> The  
19 15 payments received through the vouchers will also encourage facilities to become more sensitive  
20 16 to the needs of pregnant women and would have incentives to invest to become fully functional  
21 17 EmOC providers. An initiative in two provinces in PNG that provided incentive packages to  
22 18 pregnant women increased facility-based supervised birth rates by 80%<sup>34</sup> indicating that  
23 19 enhancing facility readiness combined with incentivizing pregnant women to utilize health  
24 20 facilities will be very effective in improving maternal and neonatal health.

### 21 ***Study Limitations***

22  
23  
24  
25  
26  
27  
28  
29  
30  
31  
32  
33 22 Several limitations of the study should be mentioned here. First, it is not possible to indicate  
34 23 overall geographic access to primary health care services in PNG using the survey data because  
35 24 the study did not collect information from level 1 and 2 health facilities. However, these facilities  
36 25 do not provide obstetric care services although some basic services like family planning and  
37 26 antenatal care can potentially be organized at these levels. Second, the survey, strictly speaking,  
38 27 is not a representative survey of level 3 and 4 facilities. The survey design selected high-demand  
39 28 fully functional level 3 and 4 facilities in target districts and the definition of fully functional led  
40 29 to the choice of facilities that showed relatively high level of utilization. Therefore, if anything,  
41 30 the results are likely to be significant overestimations of degree of readiness of the facilities in  
42 31 the provision of obstetric care and other related services in PNG. Even with this favorable  
43 32 selection of facilities, the percent of facilities able to perform BEmOC and CEmOC was quite low  
44 33 at levels 3 and 4 implying that the availability of obstetric care services could be significantly  
45 34 worse than what has been reported in this study. Third, the study did not try to connect the  
46 35 service availability and readiness with health outcomes of the population at the subnational level.  
47 36 In PNG, even the national level estimates of mortality and morbidity are considered unreliable  
48 37 and subnational level estimates would suffer from even higher degree of error in estimation. In  
49 38 any case, facility level information clearly indicates that many of the functional facilities are not

1  
2  
3 1 ready to provide obstetric health services and a significant proportion of facilities lack medical  
4 2 equipment, instruments and supplies for the provision of quality maternity and neonatal services.

5  
6 3 **Conclusions**

7  
8 4 Inability of a health facility, irrespective of whether it is a primary, secondary and tertiary care  
9 5 facility, to provide obstetric care and other related services is an important concern for any health  
10 6 care system. It is especially true for a country like PNG where maternal and infant mortalities are  
11 7 high alongside a high fertility rate. Improved availability and utilization of family planning services  
12 8 can help reduce the demand for EmOC, lower maternal and neonatal mortality/morbidity and  
13 9 improve access to maternity services. Lowering the need for maternity services through  
14 10 interventions like family planning, however, is unlikely to improve access to maternity care  
15 11 significantly in the short-run. Supply-side interventions are necessary to ensure that the services  
16 12 are available in strategically located health facilities. Improving facility infrastructure, equipping  
17 13 the facilities with essential medical equipment and supplies and ensuring the presence of trained  
18 14 personnel in health facilities are needed to make the facilities BEmOC or CEmOC providers. Since  
19 15 the number of facilities in PNG offering EmOC is quite low compared to the needs, all level 3 and  
20 16 4 facilities should be upgraded to at least the BEmOC level. Survey-based estimates suggest that  
21 17 only 50 facilities in PNG can be considered CEmOC providers and this number is inadequate to  
22 18 ensure equitable access to emergency obstetric cases. Increasing the number of CEmOC  
23 19 providers is urgently needed.

24  
25  
26  
27  
28  
29  
30 20  
31 21  
32  
33 22  
34  
35  
36  
37  
38  
39  
40  
41  
42  
43  
44  
45  
46  
47  
48  
49  
50  
51  
52  
53  
54  
55  
56  
57  
58  
59  
60

1

2 **Figure caption**

3

4 Figure 1. Three components of Donabedian approach of evaluating quality of care

5

6 Figure 2. Map of PNG with Districts Visited (green) and Location of Surveyed Facilities

7

For peer review only



1  
2  
3 **1 References:**  
4

- 5 2 1. Islam, M.T., et al., *Improvement of coverage and utilization of EmOC services in*  
6 3 *southwestern Bangladesh*. Int J Gynaecol Obstet, 2005. **91**(3): p. 298-305; discussion  
7 4 283-4.  
8 4  
9 5 2. Turab, A., et al., *Improved accessibility of emergency obstetrics and newborn care*  
10 6 *(EmONC) services for maternal and newborn health: a community based project*. BMC  
11 7 Pregnancy Childbirth, 2013. **13**: p. 136.  
12 8 3. Chavula, K., et al., *Readiness of hospitals to provide Kangaroo Mother Care (KMC) and*  
13 9 *documentation of KMC service delivery: Analysis of Malawi 2014 Emergency Obstetric*  
14 10 *and Newborn Care (EmONC) survey data*. J Glob Health, 2017. **7**(2): p. 020802.  
15 10  
16 11 4. Ameh, C.A., et al., *The effectiveness of training in emergency obstetric care: a systematic*  
17 12 *literature review*. Health Policy Plan, 2019. **34**(4): p. 257-270.  
18 12  
19 13 5. Lee, A.C., et al., *Care during labor and birth for the prevention of intrapartum-related*  
20 14 *neonatal deaths: a systematic review and Delphi estimation of mortality effect*. BMC  
21 15 Public Health, 2011. **11 Suppl 3**(Suppl 3): p. S10.  
22 16 6. Paxton, A., et al., *Global patterns in availability of emergency obstetric care*. Int J  
23 17 Gynaecol Obstet, 2006. **93**(3): p. 300-7.  
24 17  
25 18 7. Banke-Thomas, A., et al., *Assessing emergency obstetric care provision in low- and*  
26 19 *middle-income countries: a systematic review of the application of global guidelines*.  
27 20 Glob Health Action, 2016. **9**: p. 31880.  
28 20  
29 21 8. Government of Papua New Guinea, *National Health Plan 2011–2020, Volume 1: Policies*  
30 22 *and Strategies*. June 2010,.  
31 23 9. Mola, G. and B. Kirby, *Discrepancies between national maternal mortality data and*  
32 24 *international estimates: The experience of Papua New Guinea*. Reproductive health  
33 25 matters, 2013. **21**: p. 191-202.  
34 26 10. Robbers, G., et al., *Maternal and newborn health indicators in Papua New Guinea –*  
35 27 *2008–2018*. Sexual and Reproductive Health Matters, 2019. **27**(1): p. 52-68.  
36 27  
37 28 11. PNG National Department of Health, *Health Information Systems*. 2019.  
38 29 12. WHO, UNICEF, UNFPA, World Bank Group, and the United Nations Population Division.  
39 30 *Trends in Maternal Mortality: 2000 to 2017*. Geneva, World Health Organization, 2019.  
40 30  
41 31 13. National Statistical Office (NSO) [Papua New Guinea] and ICF, *Papua New Guinea*  
42 32 *Demographic and Health Survey 2016-18*. Port Moresby, Papua New Guinea, and  
43 33 Rockville, Maryland, USA: NSO and ICF. 2019.  
44 34 14. Mola, G., I Aitken, *Maternal mortality in Papua New Guinea 1976-1983*. PNG Medical  
45 35 Journal, 1984. **27**(2): p. 65-71.  
46 35  
47 36 15. Dennis, A.T., *Reducing Maternal Mortality in Papua New Guinea: Contextualizing Access*  
48 37 *to Safe Surgery and Anesthesia*. Anesthesia & Analgesia: January 2018. **126**(1): p 252-  
49 38 259. doi: 10.1213/ANE.0000000000002550  
50 39 16. Martin, J., Goa Tau, Meena Nathan Cherian, Jennifer Vergel de Dios, David Mills, Jane  
51 40 Fitzpatrick, William Adu-Krow & Davy Cheng, *Survey of the capacity for essential surgery*  
52 40 *and anaesthesia services in Papua New Guinea*. BMJ Open 2015;5: e009841.  
53 41 doi:10.1136/bmjopen-2015-009841.  
54 42

- 1 17. Donabedian, A., *Evaluating the Quality of Medical Care*. The Milbank Quarterly, 2005  
2 83(4): p. 691-729 (reprint from 44(3): 166-203, 1966).
- 3 18. WHO, UNFPA, UNCEF, & AMDD, *Monitoring emergency obstetric care: a handbook*.  
4 2009, Geneva: World Health Organization.
- 5 19. NDOH, *Christian Health Services Technical Assistance Mission Report*. 2013, National  
6 Department of Health: Port Moresby, Papua New Guinea.
- 7 20. Government of PNG (GoPNG), *National Health Service Standards for Papua New Guinea*  
8 2011-2020, Volumes 1 and 2, June 2011.
- 9 21. Khan, M. Mahmud, Xiaohui Hou, Olga PM Saweri, Ibrahim Demir, Rifat Haider, Shakil  
10 Ahmed and Justin Pulford, *Service Delivery by Health Facilities in Papua New Guinea:*  
11 *Report based on a countrywide health facility survey*, Washington DC: The World Bank  
12 Group. December 2017.
- 13 22. World Bank, *Universal Maternal Health Coverage? Assessing the Readiness of Public*  
14 *Health Facilities to Provide Maternal Health Care in Indonesia*. Washington, DC: World  
15 Bank. 2014.
- 16 23. World Bank, *Maternal Health Out-of-Pocket Expenditure and Service Readiness in Lao*  
17 *PDR*. Washington, DC: World Bank. 2013.
- 18 24. Chola L, McGee S, Tugendhaft A, Buchmann E, Hofman K. *Scaling Up Family Planning to*  
19 *Reduce Maternal and Child Mortality: The Potential Costs and Benefits of Modern*  
20 *Contraceptive Use in South Africa*. PLoS ONE 2015, 10(6): e0130077.  
21 doi:10.1371/journal.pone.0130077
- 22 25. Budi Utomo, B. , Purwa Kurnia Suchaya, Nohan Arum Romadlona, Annette Sachs  
23 Robertson, Riznawaty Imma Aryanty and Robert Joseph Magnani, *The impact of family*  
24 *planning on maternal mortality in Indonesia: what future contribution can be expected?*  
25 *Population Health Metrics* (2021) 19:2, <https://doi.org/10.1186/s12963-020-00245-w>
- 26 26. Winikoff, B. & Maureen Sullivan. *Assessing the Role of Family Planning in Reducing*  
27 *Maternal Mortality*, *Studies in Family Planning* , May - Jun., 1987, 18(3), p. 128-143
- 28 27. McKinnon, B., et al., *Distance to emergency obstetric services and early neonatal*  
29 *mortality in Ethiopia*. *Trop Med Int Health*, 2014. **19**(7): p. 780-90.
- 30 28. Ebener, S., et al., *Proposing standardised geographical indicators of physical access to*  
31 *emergency obstetric and newborn care in low-income and middle-income countries*. *BMJ*  
32 *Glob Health*, 2019. **4**(Suppl 5): p. e000778.
- 33 29. World Bank, *Health Financing System Assessment : Papua New Guinea*. World Bank,  
34 Washington, . 2017.
- 35 30. Mola, G., *Upskilling experienced female CHWs currently working in maternity care in*  
36 *rural health facilities in maternity care skills*, unpublished memo, December 2020.
- 37 31. Cairns, A. and Xiaohui Hou , *Financing the frontline : an analytical review of provincial*  
38 *administrations' rural health expenditure 2006-2012 . Health, Nutrition, and Population*  
39 *(HNP) discussion paper*. Washington, D.C. : World Bank Group. , in 2015:  
40 <https://hubs.worldbank.org/docs/ImageBank/Pages/DocProfile.aspx?nodeid=25991656>.
- 41 32. Paul, E. and D. Renmans, *Performance-based financing in the health sector in low- and*  
42 *middle-income countries: Is there anything whereof it may be said, see, this is new?* *Int J*  
43 *Health Plann Manage*, 2018. **33**(1): p. 51-66.

1  
2  
3  
4  
5  
6  
7  
8  
9  
10  
11  
12  
13  
14  
15  
16  
17  
18  
19  
20  
21  
22  
23  
24  
25  
26  
27  
28  
29  
30  
31  
32  
33  
34  
35  
36  
37  
38  
39  
40  
41  
42  
43  
44  
45  
46  
47  
48  
49  
50  
51  
52  
53  
54  
55  
56  
57  
58  
59  
60

1 33. CM, B., et al., *The impact of vouchers on the use and quality of health care in developing*  
2 *countries: a systematic review*. Glob Public Health, 2013. **8**(4): p. 363-88.  
3 34. Mola, G., A pioneering approach to birthing, PNG Attitude, December 2019.  
4 <https://www.pngattitude.com/2019/12/a-pioneering-approach-to-birthing.html>  
5  
6

For peer review only

**Table 1. Readiness Index for provision of general clinical services by Facility Level in Papua New Guinea**

| Readiness indicators                                                      | Level 3 and 4 |     |             |     | Level 5 and 6 |      | Level 7    |      |
|---------------------------------------------------------------------------|---------------|-----|-------------|-----|---------------|------|------------|------|
|                                                                           | Public        | %   | Church      | %   | N             | %    | N          | %    |
| Electricity connected to supply grid                                      | 10            | 34% | 7           | 28% | 17            | 94%  | 1          | 100% |
| Backup generator                                                          | 14            | 48% | 19          | 76% | 18            | 100% | 1          | 100% |
| Electricity availability (supply or generator)                            | 20            | 69% | 21          | 84% | 18            | 100% | 1          | 100% |
| Blackout last week                                                        | 8             | 28% | 6           | 24% | 15            | 83%  | 0          | 0    |
| Problem last month running generator due to fuel shortage                 | 8             | 28% | 10          | 40% | 3             | 17%  | 0          | 0    |
| Water from main line                                                      | 2             | 7%  | 3           | 12% | 15            | 83%  | 1          | 100% |
| Water shortage last year                                                  | 18            | 62% | 11          | 44% | 7             | 39%  | 0          | 0    |
| Water available for use by health care providers                          | 24            | 83% | 21          | 84% | 18            | 100% | 1          | 100% |
| Water available in delivery room                                          | 13            | 45% | 18          | 72% | 18            | 100% | 1          | 100% |
| Facility does direct blood transfusion                                    | 3             | 10% | 3           | 12% | 16            | 89%  | 1          | 100% |
| Blood transfusions done last month                                        | 3             | 10% | 3           | 12% | 18            | 100% | 1          | 100% |
| Facility has designated space for clinicians to provide service           | 20            | 69% | 20          | 80% | 18            | 100% | 1          | 100% |
| Facility has on-call room or space for health care providers to take rest | 3             | 10% | 11          | 44% | 10            | 56%  | 1          | 100% |
| Facility has telephone or shortwave radio                                 | 14            | 48% | 14          | 56% | 15            | 83%  | 1          | 100% |
| Facility has ambulance                                                    | 26            | 90% | 24          | 96% | 17            | 94%  | 1          | 100% |
| Ambulance out of service last year                                        | 11            | 38% | 10          | 40% | 6             | 33%  | 0          | 0    |
| Facility has other vehicles                                               | 8             | 28% | 5           | 20% | 18            | 100% | 1          | 100% |
| Facility has operation theatre                                            | 8             | 28% | 9           | 36% | 18            | 100% | 1          | 100% |
| <b>Index of readiness</b>                                                 | <b>40.3</b>   |     | <b>48.5</b> |     | <b>84.6</b>   |      | <b>100</b> |      |

Source: 2015 Survey of health facilities in PNG (survey conducted by this study)

1 **Table 2. Availability of Family Planning Items by Facility Level in Papua New Guinea**

| Family planning (FP) items | Level 3 and 4 facilities |             |             |             | Level 5 and 6 facilities |                    | Level 7 facilities |              |
|----------------------------|--------------------------|-------------|-------------|-------------|--------------------------|--------------------|--------------------|--------------|
|                            | # of Public              | % of Public | # of Church | % of Church | # of Public              | % of Level 5 and 6 | # of Public        | % of Level 7 |
| Oral pills                 | 26                       | 90%         | 21          | 84%         | 17                       | 94%                | 1                  | 100%         |
| FP injections              | 22                       | 76%         | 22          | 88%         | 15                       | 83%                | 0                  | 0%           |
| Condoms                    | 23                       | 79%         | 20          | 80%         | 16                       | 89%                | 1                  | 100%         |
| <b>Index of FP items</b>   | <b>81.6</b>              |             | <b>84.0</b> |             | <b>88.9</b>              |                    | <b>66.7</b>        |              |

2 *Source: 2015 Survey of health facilities in PNG (survey conducted by this study)*

3  
 4  
 5  
 6  
 7  
 8  
 9  
 10  
 11  
 12  
 13  
 14  
 15  
 16  
 17  
 18  
 19  
 20  
 21  
 22  
 23  
 24  
 25  
 26  
 27  
 28  
 29  
 30  
 31  
 32  
 33  
 34  
 35  
 36  
 37  
 38  
 39  
 40  
 41  
 42  
 43  
 44  
 45  
 46  
 47  
 48  
 49  
 50  
 51  
 52  
 53  
 54  
 55  
 56  
 57  
 58  
 59  
 60

22

For peer review only - <http://bmjopen.bmj.com/site/about/guidelines.xhtml>

**Table 3. Availability of Supplies and Equipment for Maternity Care in PNG by Health Facility Level**

| Antenatal, pregnancy, obstetric and neonatal care related equipment and supplies | Level 3 and 4 facilities |             |              |             | Level 5 and 6 facilities |      | Level 7 facility |      |
|----------------------------------------------------------------------------------|--------------------------|-------------|--------------|-------------|--------------------------|------|------------------|------|
|                                                                                  | # of Public              | % of Public | # of Church  | % of Church | # of Public              | %    | # of Public      | %    |
| Foetal stethoscope (or monitor)                                                  | 27                       | 93%         | 25           | 100%        | 14                       | 78%  | 1                | 100% |
| Stethoscope and blood pressure cuff                                              | 22                       | 76%         | 25           | 100%        | 16                       | 89%  | 1                | 100% |
| Tape measure                                                                     | 23                       | 79%         | 22           | 88%         | 16                       | 89%  | 1                | 100% |
| Scale                                                                            | 28                       | 97%         | 25           | 100%        | 16                       | 89%  | 1                | 100% |
| Ultrasound machine (and gel)                                                     | 28                       | 97%         | 25           | 100%        | 17                       | 94%  | 1                | 100% |
| Stethoscope                                                                      | 10                       | 34%         | 11           | 44%         | 15                       | 83%  | 1                | 100% |
| Pelvic procedure instruments such as speculum                                    | 18                       | 62%         | 22           | 88%         | 16                       | 89%  | 1                | 100% |
| <b>Index: availability of antenatal care items</b>                               | <b>76.85</b>             |             | <b>88.57</b> |             | <b>87.30</b>             |      | <b>100</b>       |      |
| Delivery light                                                                   | 24                       | 83%         | 24           | 96%         | 18                       | 100% | 1                | 100% |
| Partograph                                                                       | 11                       | 38%         | 13           | 52%         | 14                       | 78%  | 1                | 100% |
| Sterilizer                                                                       | 15                       | 52%         | 16           | 64%         | 13                       | 72%  | 1                | 100% |
| Vacuum extractor                                                                 | 14                       | 48%         | 21           | 84%         | 18                       | 100% | 1                | 100% |
| Forceps                                                                          | 25                       | 86%         | 25           | 100%        | 18                       | 100% | 1                | 100% |
| Manual vacuum aspirator/suction bulb                                             | 27                       | 93%         | 25           | 100%        | 17                       | 94%  | 1                | 100% |
| Facility has at least two skilled birth attendants covering 24 hours a day       | 21                       | 72%         | 19           | 76%         | 18                       | 100% | 1                | 100% |
| Delivery kit (instruments, supplies)                                             | 25                       | 86%         | 25           | 100%        | 18                       | 100% | 1                | 100% |
| Resuscitation bag, newborn                                                       | 4                        | 14%         | 4            | 16%         | 15                       | 83%  | 1                | 100% |
| Eye drops or ointment for newborn                                                | 27                       | 93%         | 25           | 100%        | 18                       | 100% | 1                | 100% |
| Needles and syringes                                                             | 28                       | 97%         | 25           | 100%        | 18                       | 100% | 1                | 100% |
| Sterile C-section instrument kits                                                | 28                       | 97%         | 25           | 100%        | 18                       | 100% | 1                | 100% |
| Cord supplies for newborn: clamps, ties, scissors                                | 2                        | 7%          | 5            | 20%         | 12                       | 67%  | 1                | 100% |
| IV sets, including sterilized needle and tube                                    | 27                       | 93%         | 25           | 100%        | 17                       | 94%  | 1                | 100% |
| IV fluids, including normal saline and ringer lactate                            | 29                       | 100%        | 25           | 100%        | 18                       | 100% | 1                | 100% |
| <b>Index: availability of obstetric and neonatal care items</b>                  | <b>70.57</b>             |             | <b>80.53</b> |             | <b>92.52</b>             |      | <b>100</b>       |      |

Source: 2015 Survey of health facilities in PNG (survey conducted by this study)

**Table 4. Percentage of Health Facilities Able to Perform Signal Functions with Categorization of Facilities into Basic Emergency Obstetric Care and Comprehensive Emergency Obstetric Care Providers**

| Signal functions for obstetric and neonatal care                                                                        | Ability to perform    | Level 3 and 4 public % (n) | Level 3 and 4 church % (n) | Level 5 to 7 % (n) | Total % (n) |
|-------------------------------------------------------------------------------------------------------------------------|-----------------------|----------------------------|----------------------------|--------------------|-------------|
| Signal functions 1-3: Have capacity to administer parenteral antibiotics, uterotonic drugs, parenteral anticonvulsants? | Yes, all three        | 76% (22)                   | 80% (20)                   | 89% (17)           | 81% (59)    |
|                                                                                                                         | Yes, two of the three | 10% (3)                    | 16% (4)                    | 5% (1)             | 11% (8)     |
|                                                                                                                         | Yes, one of the three | 3% (1)                     | 4% (1)                     | 0% (0)             | 3% (2)      |
| Signal function 4: Have the ability for manual removal of placenta?                                                     | Yes                   | 72% (21)                   | 88% (22)                   | 95% (18)           | 84% (61)    |
| Signal function 5: Have ability to remove retained products?                                                            | Yes                   | 59% (17)                   | 80% (20)                   | 95% (18)           | 75% (55)    |
| Signal function 6: Have the capacity to perform assisted vaginal delivery?                                              | Yes                   | 59% (17)                   | 72% (18)                   | 89% (17)           | 71% (52)    |
| Signal function 7: Have ability to Perform basic neonatal resuscitation                                                 | Yes                   | 72% (21)                   | 96% (24)                   | 95% (18)           | 86% (63)    |
| Signal function 8: Have ability to perform surgery and manage caesarean section                                         | Yes                   | 14% (4)                    | 16% (4)                    | 95% (18)           | 36% (26)    |
| Signal function 9: Have capacity to do safe blood transfusion                                                           | Yes                   | 14% (4)                    | 20% (5)                    | 89% (17)           | 36% (26)    |
| Ability to perform first seven signal functions                                                                         | Basic EmOC            | 38% (11)                   | 52% (13)                   | 84% (16)           | 55% (40)    |
| Ability to perform all nine signal functions                                                                            | Comprehensive EmOC    | 10% (3)                    | 12% (3)                    | 79% (15)           | 29% (21)    |

Source: 2015 Survey of health facilities in PNG (survey conducted by this study)

1  
2  
3 **Figure 1. Three components of Donabedian approach of evaluating quality of care**  
4  
5  
6  
7  
8  
9  
10



Source: Donabedian (2005)



1  
2  
3  
4  
5  
6  
7  
8  
9  
10  
11  
12  
13  
14  
15  
16  
17  
18  
19  
20  
21  
22  
23  
24  
25  
26  
27  
28  
29  
30  
31  
32  
33  
34  
35  
36  
37  
38  
39  
40  
41  
42  
43  
44  
45  
46  
47  
48  
49  
50  
51  
52  
53  
54  
55  
56  
57  
58  
59  
60

**Figure 2. Map of PNG with Districts Visited (green) and Location of Surveyed Facilities**



Note: Red squares represent the level 5 to 7 facilities while the blue squares represent the level 3 to 4 facilities surveyed.

1  
2  
3  
4  
5  
6  
7  
8  
9  
10  
11  
12  
13  
14  
15  
16  
17  
18  
19  
20  
21  
22  
23  
24  
25  
26  
27  
28  
29  
30  
31  
32  
33  
34  
35  
36  
37  
38  
39  
40  
41  
42  
43  
44  
45  
46  
47  
48  
49  
50  
51  
52  
53  
54  
55  
56  
57  
58  
59  
60

# Health Facility Efficiency Study in PNG with a Focus on Secondary Care

Health Facility Assessment 2014

Papua New Guinea Institute of Medical Research,  
PO Box 60 Goroka, Papua New Guinea;  
University of South Carolina, Columbia, South Carolina, USA;  
and Nossal Institute for Global Health, Melbourne, Australia.

### Face sheet for Health Facility Assessment

| IDENTIFICATION                                                                                                                                                                                                                                                                                                                                                                                                                                                                                                                                                             |                                                                                                                                                                                                                                                                                                                                                                                                                                                                                                                                                                                                                                                                                                                                                                                                                                                                                                  |               |                                                                                                                                                                                                                                                                                                                                                                                                                                                                                                                                                                                                                                                                                                                                                                                                |                                                                                                                                                                                                                                                                                                                                                                                                                                                                 |  |                                                                                                                                                                                                  |  |  |                                                                                                                                                                                                  |  |  |  |  |  |  |  |  |
|----------------------------------------------------------------------------------------------------------------------------------------------------------------------------------------------------------------------------------------------------------------------------------------------------------------------------------------------------------------------------------------------------------------------------------------------------------------------------------------------------------------------------------------------------------------------------|--------------------------------------------------------------------------------------------------------------------------------------------------------------------------------------------------------------------------------------------------------------------------------------------------------------------------------------------------------------------------------------------------------------------------------------------------------------------------------------------------------------------------------------------------------------------------------------------------------------------------------------------------------------------------------------------------------------------------------------------------------------------------------------------------------------------------------------------------------------------------------------------------|---------------|------------------------------------------------------------------------------------------------------------------------------------------------------------------------------------------------------------------------------------------------------------------------------------------------------------------------------------------------------------------------------------------------------------------------------------------------------------------------------------------------------------------------------------------------------------------------------------------------------------------------------------------------------------------------------------------------------------------------------------------------------------------------------------------------|-----------------------------------------------------------------------------------------------------------------------------------------------------------------------------------------------------------------------------------------------------------------------------------------------------------------------------------------------------------------------------------------------------------------------------------------------------------------|--|--------------------------------------------------------------------------------------------------------------------------------------------------------------------------------------------------|--|--|--------------------------------------------------------------------------------------------------------------------------------------------------------------------------------------------------|--|--|--|--|--|--|--|--|
| PROVINCE _____<br>DISTRICT _____<br>LOCAL LEVEL GOVERNMENT AREA _____<br>NAME AND TYPE/ID OF THE FACILITY _____<br>(HC=03, DLH =04, PH =05, RH=06, NH=07)<br>OWNERSHIP OF THE FACILITY _____<br>(PUBLIC =01, CHURCH CATHOLIC =02, CHURCH LUTHERAN=03, CHURCH SDA =04)<br>NAME AND DESIGNATION OF THE RESPONDENT _____<br>Consultant =01, OIC/Head Administrator = 02, Medical Officer =03, Dental Officer=04, Health Extension Officer =05, Nurse =06, Midwife=07, Community Health Worker =08, Other Allied Health worker = 09)<br>SEX OF THE RESPONDENT: MALE 1 FEMALE 2 | <table border="1" style="margin: 5px auto; border-collapse: collapse;"> <tr><td style="width: 20px; height: 20px;"></td><td style="width: 20px; height: 20px;"></td></tr> <tr><td style="width: 20px; height: 20px;"></td><td style="width: 20px; height: 20px;"></td></tr> <tr><td style="width: 20px; height: 20px;"></td><td style="width: 20px; height: 20px;"></td></tr> <tr><td style="width: 20px; height: 20px;"></td><td style="width: 20px; height: 20px;"></td></tr> <tr><td style="width: 20px; height: 20px;"></td><td style="width: 20px; height: 20px;"></td></tr> <tr><td style="width: 20px; height: 20px;"></td><td style="width: 20px; height: 20px;"></td></tr> <tr><td style="width: 20px; height: 20px;"></td><td style="width: 20px; height: 20px;"></td></tr> <tr><td style="width: 20px; height: 20px;"></td><td style="width: 20px; height: 20px;"></td></tr> </table> |               |                                                                                                                                                                                                                                                                                                                                                                                                                                                                                                                                                                                                                                                                                                                                                                                                |                                                                                                                                                                                                                                                                                                                                                                                                                                                                 |  |                                                                                                                                                                                                  |  |  |                                                                                                                                                                                                  |  |  |  |  |  |  |  |  |
|                                                                                                                                                                                                                                                                                                                                                                                                                                                                                                                                                                            |                                                                                                                                                                                                                                                                                                                                                                                                                                                                                                                                                                                                                                                                                                                                                                                                                                                                                                  |               |                                                                                                                                                                                                                                                                                                                                                                                                                                                                                                                                                                                                                                                                                                                                                                                                |                                                                                                                                                                                                                                                                                                                                                                                                                                                                 |  |                                                                                                                                                                                                  |  |  |                                                                                                                                                                                                  |  |  |  |  |  |  |  |  |
|                                                                                                                                                                                                                                                                                                                                                                                                                                                                                                                                                                            |                                                                                                                                                                                                                                                                                                                                                                                                                                                                                                                                                                                                                                                                                                                                                                                                                                                                                                  |               |                                                                                                                                                                                                                                                                                                                                                                                                                                                                                                                                                                                                                                                                                                                                                                                                |                                                                                                                                                                                                                                                                                                                                                                                                                                                                 |  |                                                                                                                                                                                                  |  |  |                                                                                                                                                                                                  |  |  |  |  |  |  |  |  |
|                                                                                                                                                                                                                                                                                                                                                                                                                                                                                                                                                                            |                                                                                                                                                                                                                                                                                                                                                                                                                                                                                                                                                                                                                                                                                                                                                                                                                                                                                                  |               |                                                                                                                                                                                                                                                                                                                                                                                                                                                                                                                                                                                                                                                                                                                                                                                                |                                                                                                                                                                                                                                                                                                                                                                                                                                                                 |  |                                                                                                                                                                                                  |  |  |                                                                                                                                                                                                  |  |  |  |  |  |  |  |  |
|                                                                                                                                                                                                                                                                                                                                                                                                                                                                                                                                                                            |                                                                                                                                                                                                                                                                                                                                                                                                                                                                                                                                                                                                                                                                                                                                                                                                                                                                                                  |               |                                                                                                                                                                                                                                                                                                                                                                                                                                                                                                                                                                                                                                                                                                                                                                                                |                                                                                                                                                                                                                                                                                                                                                                                                                                                                 |  |                                                                                                                                                                                                  |  |  |                                                                                                                                                                                                  |  |  |  |  |  |  |  |  |
|                                                                                                                                                                                                                                                                                                                                                                                                                                                                                                                                                                            |                                                                                                                                                                                                                                                                                                                                                                                                                                                                                                                                                                                                                                                                                                                                                                                                                                                                                                  |               |                                                                                                                                                                                                                                                                                                                                                                                                                                                                                                                                                                                                                                                                                                                                                                                                |                                                                                                                                                                                                                                                                                                                                                                                                                                                                 |  |                                                                                                                                                                                                  |  |  |                                                                                                                                                                                                  |  |  |  |  |  |  |  |  |
|                                                                                                                                                                                                                                                                                                                                                                                                                                                                                                                                                                            |                                                                                                                                                                                                                                                                                                                                                                                                                                                                                                                                                                                                                                                                                                                                                                                                                                                                                                  |               |                                                                                                                                                                                                                                                                                                                                                                                                                                                                                                                                                                                                                                                                                                                                                                                                |                                                                                                                                                                                                                                                                                                                                                                                                                                                                 |  |                                                                                                                                                                                                  |  |  |                                                                                                                                                                                                  |  |  |  |  |  |  |  |  |
|                                                                                                                                                                                                                                                                                                                                                                                                                                                                                                                                                                            |                                                                                                                                                                                                                                                                                                                                                                                                                                                                                                                                                                                                                                                                                                                                                                                                                                                                                                  |               |                                                                                                                                                                                                                                                                                                                                                                                                                                                                                                                                                                                                                                                                                                                                                                                                |                                                                                                                                                                                                                                                                                                                                                                                                                                                                 |  |                                                                                                                                                                                                  |  |  |                                                                                                                                                                                                  |  |  |  |  |  |  |  |  |
|                                                                                                                                                                                                                                                                                                                                                                                                                                                                                                                                                                            |                                                                                                                                                                                                                                                                                                                                                                                                                                                                                                                                                                                                                                                                                                                                                                                                                                                                                                  |               |                                                                                                                                                                                                                                                                                                                                                                                                                                                                                                                                                                                                                                                                                                                                                                                                |                                                                                                                                                                                                                                                                                                                                                                                                                                                                 |  |                                                                                                                                                                                                  |  |  |                                                                                                                                                                                                  |  |  |  |  |  |  |  |  |
| Other persons interviewed for information :<br>Name:                                                                                                                                                                                                                                                                                                                                                                                                                                                                                                                       | Designation (enter code in boxes from above):                                                                                                                                                                                                                                                                                                                                                                                                                                                                                                                                                                                                                                                                                                                                                                                                                                                    |               | <table border="1" style="margin: 5px auto; border-collapse: collapse;"> <tr><td style="width: 20px; height: 20px;"></td><td style="width: 20px; height: 20px;"></td></tr> <tr><td style="width: 20px; height: 20px;"></td><td style="width: 20px; height: 20px;"></td></tr> <tr><td style="width: 20px; height: 20px;"></td><td style="width: 20px; height: 20px;"></td></tr> <tr><td style="width: 20px; height: 20px;"></td><td style="width: 20px; height: 20px;"></td></tr> <tr><td style="width: 20px; height: 20px;"></td><td style="width: 20px; height: 20px;"></td></tr> <tr><td style="width: 20px; height: 20px;"></td><td style="width: 20px; height: 20px;"></td></tr> <tr><td style="width: 20px; height: 20px;"></td><td style="width: 20px; height: 20px;"></td></tr> </table> |                                                                                                                                                                                                                                                                                                                                                                                                                                                                 |  |                                                                                                                                                                                                  |  |  |                                                                                                                                                                                                  |  |  |  |  |  |  |  |  |
|                                                                                                                                                                                                                                                                                                                                                                                                                                                                                                                                                                            |                                                                                                                                                                                                                                                                                                                                                                                                                                                                                                                                                                                                                                                                                                                                                                                                                                                                                                  |               |                                                                                                                                                                                                                                                                                                                                                                                                                                                                                                                                                                                                                                                                                                                                                                                                |                                                                                                                                                                                                                                                                                                                                                                                                                                                                 |  |                                                                                                                                                                                                  |  |  |                                                                                                                                                                                                  |  |  |  |  |  |  |  |  |
|                                                                                                                                                                                                                                                                                                                                                                                                                                                                                                                                                                            |                                                                                                                                                                                                                                                                                                                                                                                                                                                                                                                                                                                                                                                                                                                                                                                                                                                                                                  |               |                                                                                                                                                                                                                                                                                                                                                                                                                                                                                                                                                                                                                                                                                                                                                                                                |                                                                                                                                                                                                                                                                                                                                                                                                                                                                 |  |                                                                                                                                                                                                  |  |  |                                                                                                                                                                                                  |  |  |  |  |  |  |  |  |
|                                                                                                                                                                                                                                                                                                                                                                                                                                                                                                                                                                            |                                                                                                                                                                                                                                                                                                                                                                                                                                                                                                                                                                                                                                                                                                                                                                                                                                                                                                  |               |                                                                                                                                                                                                                                                                                                                                                                                                                                                                                                                                                                                                                                                                                                                                                                                                |                                                                                                                                                                                                                                                                                                                                                                                                                                                                 |  |                                                                                                                                                                                                  |  |  |                                                                                                                                                                                                  |  |  |  |  |  |  |  |  |
|                                                                                                                                                                                                                                                                                                                                                                                                                                                                                                                                                                            |                                                                                                                                                                                                                                                                                                                                                                                                                                                                                                                                                                                                                                                                                                                                                                                                                                                                                                  |               |                                                                                                                                                                                                                                                                                                                                                                                                                                                                                                                                                                                                                                                                                                                                                                                                |                                                                                                                                                                                                                                                                                                                                                                                                                                                                 |  |                                                                                                                                                                                                  |  |  |                                                                                                                                                                                                  |  |  |  |  |  |  |  |  |
|                                                                                                                                                                                                                                                                                                                                                                                                                                                                                                                                                                            |                                                                                                                                                                                                                                                                                                                                                                                                                                                                                                                                                                                                                                                                                                                                                                                                                                                                                                  |               |                                                                                                                                                                                                                                                                                                                                                                                                                                                                                                                                                                                                                                                                                                                                                                                                |                                                                                                                                                                                                                                                                                                                                                                                                                                                                 |  |                                                                                                                                                                                                  |  |  |                                                                                                                                                                                                  |  |  |  |  |  |  |  |  |
|                                                                                                                                                                                                                                                                                                                                                                                                                                                                                                                                                                            |                                                                                                                                                                                                                                                                                                                                                                                                                                                                                                                                                                                                                                                                                                                                                                                                                                                                                                  |               |                                                                                                                                                                                                                                                                                                                                                                                                                                                                                                                                                                                                                                                                                                                                                                                                |                                                                                                                                                                                                                                                                                                                                                                                                                                                                 |  |                                                                                                                                                                                                  |  |  |                                                                                                                                                                                                  |  |  |  |  |  |  |  |  |
|                                                                                                                                                                                                                                                                                                                                                                                                                                                                                                                                                                            |                                                                                                                                                                                                                                                                                                                                                                                                                                                                                                                                                                                                                                                                                                                                                                                                                                                                                                  |               |                                                                                                                                                                                                                                                                                                                                                                                                                                                                                                                                                                                                                                                                                                                                                                                                |                                                                                                                                                                                                                                                                                                                                                                                                                                                                 |  |                                                                                                                                                                                                  |  |  |                                                                                                                                                                                                  |  |  |  |  |  |  |  |  |
| 1. _____                                                                                                                                                                                                                                                                                                                                                                                                                                                                                                                                                                   | 1. _____                                                                                                                                                                                                                                                                                                                                                                                                                                                                                                                                                                                                                                                                                                                                                                                                                                                                                         |               |                                                                                                                                                                                                                                                                                                                                                                                                                                                                                                                                                                                                                                                                                                                                                                                                |                                                                                                                                                                                                                                                                                                                                                                                                                                                                 |  |                                                                                                                                                                                                  |  |  |                                                                                                                                                                                                  |  |  |  |  |  |  |  |  |
| 2. _____                                                                                                                                                                                                                                                                                                                                                                                                                                                                                                                                                                   | 2. _____                                                                                                                                                                                                                                                                                                                                                                                                                                                                                                                                                                                                                                                                                                                                                                                                                                                                                         |               |                                                                                                                                                                                                                                                                                                                                                                                                                                                                                                                                                                                                                                                                                                                                                                                                |                                                                                                                                                                                                                                                                                                                                                                                                                                                                 |  |                                                                                                                                                                                                  |  |  |                                                                                                                                                                                                  |  |  |  |  |  |  |  |  |
| 3. _____                                                                                                                                                                                                                                                                                                                                                                                                                                                                                                                                                                   | 3. _____                                                                                                                                                                                                                                                                                                                                                                                                                                                                                                                                                                                                                                                                                                                                                                                                                                                                                         |               |                                                                                                                                                                                                                                                                                                                                                                                                                                                                                                                                                                                                                                                                                                                                                                                                |                                                                                                                                                                                                                                                                                                                                                                                                                                                                 |  |                                                                                                                                                                                                  |  |  |                                                                                                                                                                                                  |  |  |  |  |  |  |  |  |
| 4. _____                                                                                                                                                                                                                                                                                                                                                                                                                                                                                                                                                                   | 4. _____                                                                                                                                                                                                                                                                                                                                                                                                                                                                                                                                                                                                                                                                                                                                                                                                                                                                                         |               |                                                                                                                                                                                                                                                                                                                                                                                                                                                                                                                                                                                                                                                                                                                                                                                                |                                                                                                                                                                                                                                                                                                                                                                                                                                                                 |  |                                                                                                                                                                                                  |  |  |                                                                                                                                                                                                  |  |  |  |  |  |  |  |  |
| 5. _____                                                                                                                                                                                                                                                                                                                                                                                                                                                                                                                                                                   | 5. _____                                                                                                                                                                                                                                                                                                                                                                                                                                                                                                                                                                                                                                                                                                                                                                                                                                                                                         |               |                                                                                                                                                                                                                                                                                                                                                                                                                                                                                                                                                                                                                                                                                                                                                                                                |                                                                                                                                                                                                                                                                                                                                                                                                                                                                 |  |                                                                                                                                                                                                  |  |  |                                                                                                                                                                                                  |  |  |  |  |  |  |  |  |
| 6. _____                                                                                                                                                                                                                                                                                                                                                                                                                                                                                                                                                                   | 6. _____                                                                                                                                                                                                                                                                                                                                                                                                                                                                                                                                                                                                                                                                                                                                                                                                                                                                                         |               |                                                                                                                                                                                                                                                                                                                                                                                                                                                                                                                                                                                                                                                                                                                                                                                                |                                                                                                                                                                                                                                                                                                                                                                                                                                                                 |  |                                                                                                                                                                                                  |  |  |                                                                                                                                                                                                  |  |  |  |  |  |  |  |  |
| INTERVIEWER VISITS                                                                                                                                                                                                                                                                                                                                                                                                                                                                                                                                                         |                                                                                                                                                                                                                                                                                                                                                                                                                                                                                                                                                                                                                                                                                                                                                                                                                                                                                                  |               |                                                                                                                                                                                                                                                                                                                                                                                                                                                                                                                                                                                                                                                                                                                                                                                                |                                                                                                                                                                                                                                                                                                                                                                                                                                                                 |  |                                                                                                                                                                                                  |  |  |                                                                                                                                                                                                  |  |  |  |  |  |  |  |  |
|                                                                                                                                                                                                                                                                                                                                                                                                                                                                                                                                                                            | 1                                                                                                                                                                                                                                                                                                                                                                                                                                                                                                                                                                                                                                                                                                                                                                                                                                                                                                | 2             | 3                                                                                                                                                                                                                                                                                                                                                                                                                                                                                                                                                                                                                                                                                                                                                                                              | FINAL VISIT (DDMMYYYY)                                                                                                                                                                                                                                                                                                                                                                                                                                          |  |                                                                                                                                                                                                  |  |  |                                                                                                                                                                                                  |  |  |  |  |  |  |  |  |
| DATE                                                                                                                                                                                                                                                                                                                                                                                                                                                                                                                                                                       |                                                                                                                                                                                                                                                                                                                                                                                                                                                                                                                                                                                                                                                                                                                                                                                                                                                                                                  |               |                                                                                                                                                                                                                                                                                                                                                                                                                                                                                                                                                                                                                                                                                                                                                                                                | <table border="1" style="display: inline-table; border-collapse: collapse;"> <tr><td style="width: 20px; height: 20px;"></td><td style="width: 20px; height: 20px;"></td></tr> </table> |  |                                                                                                                                                                                                  |  |  |                                                                                                                                                                                                  |  |  |  |  |  |  |  |  |
|                                                                                                                                                                                                                                                                                                                                                                                                                                                                                                                                                                            |                                                                                                                                                                                                                                                                                                                                                                                                                                                                                                                                                                                                                                                                                                                                                                                                                                                                                                  |               |                                                                                                                                                                                                                                                                                                                                                                                                                                                                                                                                                                                                                                                                                                                                                                                                |                                                                                                                                                                                                                                                                                                                                                                                                                                                                 |  |                                                                                                                                                                                                  |  |  |                                                                                                                                                                                                  |  |  |  |  |  |  |  |  |
| INTERVIEWER'S NAME & CODE                                                                                                                                                                                                                                                                                                                                                                                                                                                                                                                                                  |                                                                                                                                                                                                                                                                                                                                                                                                                                                                                                                                                                                                                                                                                                                                                                                                                                                                                                  |               |                                                                                                                                                                                                                                                                                                                                                                                                                                                                                                                                                                                                                                                                                                                                                                                                | CODE <table border="1" style="display: inline-table; border-collapse: collapse;"><tr><td style="width: 20px; height: 20px;"></td><td style="width: 20px; height: 20px;"></td></tr></table>                                                                                                                                                                                                                                                                      |  |                                                                                                                                                                                                  |  |  |                                                                                                                                                                                                  |  |  |  |  |  |  |  |  |
|                                                                                                                                                                                                                                                                                                                                                                                                                                                                                                                                                                            |                                                                                                                                                                                                                                                                                                                                                                                                                                                                                                                                                                                                                                                                                                                                                                                                                                                                                                  |               |                                                                                                                                                                                                                                                                                                                                                                                                                                                                                                                                                                                                                                                                                                                                                                                                |                                                                                                                                                                                                                                                                                                                                                                                                                                                                 |  |                                                                                                                                                                                                  |  |  |                                                                                                                                                                                                  |  |  |  |  |  |  |  |  |
| RESULT CODE*                                                                                                                                                                                                                                                                                                                                                                                                                                                                                                                                                               |                                                                                                                                                                                                                                                                                                                                                                                                                                                                                                                                                                                                                                                                                                                                                                                                                                                                                                  |               |                                                                                                                                                                                                                                                                                                                                                                                                                                                                                                                                                                                                                                                                                                                                                                                                | RESULT CODE <table border="1" style="display: inline-table; border-collapse: collapse;"><tr><td style="width: 20px; height: 20px;"></td></tr></table>                                                                                                                                                                                                                                                                                                           |  |                                                                                                                                                                                                  |  |  |                                                                                                                                                                                                  |  |  |  |  |  |  |  |  |
|                                                                                                                                                                                                                                                                                                                                                                                                                                                                                                                                                                            |                                                                                                                                                                                                                                                                                                                                                                                                                                                                                                                                                                                                                                                                                                                                                                                                                                                                                                  |               |                                                                                                                                                                                                                                                                                                                                                                                                                                                                                                                                                                                                                                                                                                                                                                                                |                                                                                                                                                                                                                                                                                                                                                                                                                                                                 |  |                                                                                                                                                                                                  |  |  |                                                                                                                                                                                                  |  |  |  |  |  |  |  |  |
| *RESULT CODES:1: COMPLETED, 2: REFUSED, 3: PARTLY COMPLETED, 8: OTHER _____ (SPECIFY)                                                                                                                                                                                                                                                                                                                                                                                                                                                                                      |                                                                                                                                                                                                                                                                                                                                                                                                                                                                                                                                                                                                                                                                                                                                                                                                                                                                                                  |               |                                                                                                                                                                                                                                                                                                                                                                                                                                                                                                                                                                                                                                                                                                                                                                                                |                                                                                                                                                                                                                                                                                                                                                                                                                                                                 |  |                                                                                                                                                                                                  |  |  |                                                                                                                                                                                                  |  |  |  |  |  |  |  |  |
| SUPERVISOR                                                                                                                                                                                                                                                                                                                                                                                                                                                                                                                                                                 | FIELD EDITOR                                                                                                                                                                                                                                                                                                                                                                                                                                                                                                                                                                                                                                                                                                                                                                                                                                                                                     | OFFICE EDITOR | KEYED BY                                                                                                                                                                                                                                                                                                                                                                                                                                                                                                                                                                                                                                                                                                                                                                                       |                                                                                                                                                                                                                                                                                                                                                                                                                                                                 |  |                                                                                                                                                                                                  |  |  |                                                                                                                                                                                                  |  |  |  |  |  |  |  |  |
| NAME _____ <table border="1" style="display: inline-table; border-collapse: collapse;"><tr><td style="width: 20px; height: 20px;"></td><td style="width: 20px; height: 20px;"></td></tr></table>                                                                                                                                                                                                                                                                                                                                                                           |                                                                                                                                                                                                                                                                                                                                                                                                                                                                                                                                                                                                                                                                                                                                                                                                                                                                                                  |               | NAME _____ <table border="1" style="display: inline-table; border-collapse: collapse;"><tr><td style="width: 20px; height: 20px;"></td><td style="width: 20px; height: 20px;"></td></tr></table>                                                                                                                                                                                                                                                                                                                                                                                                                                                                                                                                                                                               |                                                                                                                                                                                                                                                                                                                                                                                                                                                                 |  | NAME _____ <table border="1" style="display: inline-table; border-collapse: collapse;"><tr><td style="width: 20px; height: 20px;"></td><td style="width: 20px; height: 20px;"></td></tr></table> |  |  | NAME _____ <table border="1" style="display: inline-table; border-collapse: collapse;"><tr><td style="width: 20px; height: 20px;"></td><td style="width: 20px; height: 20px;"></td></tr></table> |  |  |  |  |  |  |  |  |
|                                                                                                                                                                                                                                                                                                                                                                                                                                                                                                                                                                            |                                                                                                                                                                                                                                                                                                                                                                                                                                                                                                                                                                                                                                                                                                                                                                                                                                                                                                  |               |                                                                                                                                                                                                                                                                                                                                                                                                                                                                                                                                                                                                                                                                                                                                                                                                |                                                                                                                                                                                                                                                                                                                                                                                                                                                                 |  |                                                                                                                                                                                                  |  |  |                                                                                                                                                                                                  |  |  |  |  |  |  |  |  |
|                                                                                                                                                                                                                                                                                                                                                                                                                                                                                                                                                                            |                                                                                                                                                                                                                                                                                                                                                                                                                                                                                                                                                                                                                                                                                                                                                                                                                                                                                                  |               |                                                                                                                                                                                                                                                                                                                                                                                                                                                                                                                                                                                                                                                                                                                                                                                                |                                                                                                                                                                                                                                                                                                                                                                                                                                                                 |  |                                                                                                                                                                                                  |  |  |                                                                                                                                                                                                  |  |  |  |  |  |  |  |  |
|                                                                                                                                                                                                                                                                                                                                                                                                                                                                                                                                                                            |                                                                                                                                                                                                                                                                                                                                                                                                                                                                                                                                                                                                                                                                                                                                                                                                                                                                                                  |               |                                                                                                                                                                                                                                                                                                                                                                                                                                                                                                                                                                                                                                                                                                                                                                                                |                                                                                                                                                                                                                                                                                                                                                                                                                                                                 |  |                                                                                                                                                                                                  |  |  |                                                                                                                                                                                                  |  |  |  |  |  |  |  |  |
|                                                                                                                                                                                                                                                                                                                                                                                                                                                                                                                                                                            |                                                                                                                                                                                                                                                                                                                                                                                                                                                                                                                                                                                                                                                                                                                                                                                                                                                                                                  |               |                                                                                                                                                                                                                                                                                                                                                                                                                                                                                                                                                                                                                                                                                                                                                                                                |                                                                                                                                                                                                                                                                                                                                                                                                                                                                 |  |                                                                                                                                                                                                  |  |  |                                                                                                                                                                                                  |  |  |  |  |  |  |  |  |
| DATE _____                                                                                                                                                                                                                                                                                                                                                                                                                                                                                                                                                                 | DATE _____                                                                                                                                                                                                                                                                                                                                                                                                                                                                                                                                                                                                                                                                                                                                                                                                                                                                                       | DATE _____    | DATE _____                                                                                                                                                                                                                                                                                                                                                                                                                                                                                                                                                                                                                                                                                                                                                                                     |                                                                                                                                                                                                                                                                                                                                                                                                                                                                 |  |                                                                                                                                                                                                  |  |  |                                                                                                                                                                                                  |  |  |  |  |  |  |  |  |

Start time: Hour |\_\_|\_\_| Minute |\_\_|\_\_|

## Section 1. General information

| No  | Questions and Filters                                                                                                          | Coding categories                                                                                                                                                                                                                                                                                         | Response                 | Skip         |
|-----|--------------------------------------------------------------------------------------------------------------------------------|-----------------------------------------------------------------------------------------------------------------------------------------------------------------------------------------------------------------------------------------------------------------------------------------------------------|--------------------------|--------------|
| 101 | Name and position of the person interviewed for the survey (transfer information from cover page)                              | Interviewee name _____<br>Position _____                                                                                                                                                                                                                                                                  | <input type="text"/>     |              |
| 102 | Type of health facility (transfer information from cover page)                                                                 | HC.....03<br>DLH.....04<br>PH.....05<br>RH.....06<br>NH.....07<br>Other.....96                                                                                                                                                                                                                            | <input type="text"/>     |              |
| 103 | Ownership of the facility (transfer information from cover page)                                                               | Pubic.....1<br>Church Catholic.....2<br>Church Lutheran.....3<br>Church SDA.....4                                                                                                                                                                                                                         | <input type="checkbox"/> |              |
| 104 | Is there a signboard/sign with the facility name?                                                                              | Yes.....1<br>No.....2                                                                                                                                                                                                                                                                                     | <input type="checkbox"/> |              |
| 105 | Is this facility open 24 hours a day, seven days a week?                                                                       | Yes.....1<br>No.....2                                                                                                                                                                                                                                                                                     | <input type="checkbox"/> |              |
| 106 | The services available 24/7 from this facility<br><br>FOR EACH SERVICE, IF AVAILABLE 24 HOURS RECORD "1", OTHERWISE RECORD "2" | A. Inpatient hospital services<br>B. Emergency room services<br>C. Outpatient clinics for adults<br>D. Outpatient clinics for children<br>E. Outpatient clinics for women<br>F. Lab and Diagnostic Services<br>G. Pharmacy Services<br>H. Snake-bite clinic services<br>I. Other Services (specify) _____ |                          |              |
| 107 | How many days in a week the outpatient facility is open on weekdays?                                                           | Days                                                                                                                                                                                                                                                                                                      | <input type="checkbox"/> |              |
| 108 | Opening time on Weekdays (Mon-Fri)                                                                                             | Hour : Min                                                                                                                                                                                                                                                                                                | _ _  :  _ _              |              |
| 109 | Closing time on Weekdays (Mon-Fri)                                                                                             | Hour : Min                                                                                                                                                                                                                                                                                                | _ _  :  _ _              |              |
| 110 | Does this facility provide outpatient services on Saturdays and Sundays?                                                       | Only Saturdays.....1<br>Only Sundays.....2<br>Both Saturdays and Sundays.....3<br>Not open on weekends.....4                                                                                                                                                                                              | <input type="checkbox"/> | If 4<br>→113 |
| 111 | Opening time on Weekends                                                                                                       | Hour : Min                                                                                                                                                                                                                                                                                                | _ _  :  _ _              |              |
| 112 | Closing time on Weekends                                                                                                       | Hour : Min                                                                                                                                                                                                                                                                                                | _ _  :  _ _              |              |
| 113 | Is the facility is connected to electric supply grid?                                                                          | Yes.....1<br>No.....2                                                                                                                                                                                                                                                                                     | <input type="checkbox"/> | If 2<br>→117 |
| 114 | Is the electricity available 24 hours a day from the grid in a normal week?                                                    | Yes.....1<br>No.....2                                                                                                                                                                                                                                                                                     | <input type="checkbox"/> |              |
| 115 | Was electricity available through the grid all the time during the past one week?                                              | Yes.....1<br>No.....2                                                                                                                                                                                                                                                                                     | <input type="checkbox"/> |              |
| 116 | In last one week, how many hours the electricity was not available through the grid?                                           | Hours                                                                                                                                                                                                                                                                                                     | _ _ _                    |              |
| 117 | Does the facility have a functional back up or standby generator or electricity?                                               | Yes.....1<br>No.....2                                                                                                                                                                                                                                                                                     | <input type="checkbox"/> |              |

| No  | Questions and Filters                                                                                             | Coding categories                                                                                                                                    | Response                                                                                         | Skip         |
|-----|-------------------------------------------------------------------------------------------------------------------|------------------------------------------------------------------------------------------------------------------------------------------------------|--------------------------------------------------------------------------------------------------|--------------|
| 118 | Does the facility face problems with operating the backup system/generator due to lack of fuel in last one month? | Yes.....1<br>No .....2                                                                                                                               | <input type="checkbox"/>                                                                         |              |
| 119 | What is the health facility's <u>main</u> source of water now?                                                    | Piped.....1<br>Water tank (Water stored from supply).....2<br>Tube well.....3<br>Bore hole .....4<br>Protected well .....5<br>Others (Specify).....8 | <input type="checkbox"/>                                                                         |              |
| 120 | If water comes from supply line, how many hours the water is normally available in a day?                         | Hours                                                                                                                                                | <input type="text"/>                                                                             |              |
| 121 | In 2014, has water been available from this source all year?                                                      | Yes .....1<br>No .....2                                                                                                                              | <input type="checkbox"/>                                                                         |              |
| 122 | Are health workers able to use this water source today when treating patients?                                    | Yes .....1<br>No .....2                                                                                                                              | <input type="checkbox"/>                                                                         |              |
| 123 | Is the water supply connected to the delivery room and working today?                                             | Yes .....1<br>No .....2                                                                                                                              | <input type="checkbox"/>                                                                         |              |
| 124 | If there is a problem with the water supply (fixtures and lines), who is responsible for fixing it?               | Province.....1<br>District.....2<br>Church agency.....3<br>This facility.....4<br>Referral health facility .....5                                    | <input type="checkbox"/>                                                                         |              |
| 125 | How are expenses for fixing problems with the water supply met?                                                   | Request province.....1<br>Request district.....2<br>Own budget.....3<br>Referral health facility .....4                                              | <input type="checkbox"/>                                                                         |              |
| 126 | Do you think that the facility has adequate number of toilets?                                                    | Adequate.....1<br>Need few additional.....2<br>Not adequate at all.....3                                                                             | <input type="checkbox"/>                                                                         |              |
| 127 | Is there a private pharmacy within walking distance from this facility?                                           | Yes.....1<br>No .....2                                                                                                                               | <input type="checkbox"/>                                                                         |              |
| 128 | How many buildings are used to provide services in the facility?                                                  | Number of buildings                                                                                                                                  | <input type="text"/>                                                                             |              |
| 129 | Total land area of the facility                                                                                   | Land area in decimals                                                                                                                                | <input type="text"/>                                                                             |              |
| 130 | Construction materials used in the construction of the main building of the facility                              | Cement/brick.....1<br>Tin/other metals/tile.....2<br>Wood.....3<br>Leaves/other low-cost materials.....4<br>Others .....8                            | Roof <input type="checkbox"/><br>Wall <input type="checkbox"/><br>Floor <input type="checkbox"/> |              |
| 131 | Condition of the infrastructure                                                                                   | Most buildings/ building need major repairs.....1<br>In general, minor repairs needed.....2<br>Does not require much repairs.....3                   | <input type="checkbox"/>                                                                         |              |
| 132 | Is the land area around the health facility clean?                                                                | Yes.....1<br>No .....2                                                                                                                               | <input type="checkbox"/>                                                                         |              |
| 133 | Is the main building raised?                                                                                      | Yes.....1<br>No .....2                                                                                                                               | <input type="checkbox"/>                                                                         | If 2<br>→135 |
| 134 | How many meters the building is raised?                                                                           | Meters (MM.M)                                                                                                                                        | <input type="text"/>                                                                             |              |
| 135 | Are there living quarters on campus?                                                                              | Yes.....1<br>No .....2                                                                                                                               | <input type="checkbox"/>                                                                         | If 2<br>→137 |

| No  | Questions and Filters                                                                                                                         | Coding categories                                                                                                                                                                                                                                              | Response                                                                                                                                  | Skip         |
|-----|-----------------------------------------------------------------------------------------------------------------------------------------------|----------------------------------------------------------------------------------------------------------------------------------------------------------------------------------------------------------------------------------------------------------------|-------------------------------------------------------------------------------------------------------------------------------------------|--------------|
| 136 | How many families can live on campus (No. of separate quarters)                                                                               | If more than 98 families, enter 98.<br>Not known= 99                                                                                                                                                                                                           | <input type="text"/>                                                                                                                      |              |
| 137 | Does the facility have a blood bank?                                                                                                          | Yes.....1<br>No .....2                                                                                                                                                                                                                                         | <input type="checkbox"/>                                                                                                                  |              |
| 138 | Does the health unit have blood transfusion facility?                                                                                         | Yes.....1<br>No .....2                                                                                                                                                                                                                                         | <input type="checkbox"/>                                                                                                                  | If 2<br>→140 |
| 139 | Were there any blood transfusions done in the last one month?                                                                                 | Yes.....1<br>No .....2<br>Not applicable.....3                                                                                                                                                                                                                 | <input type="checkbox"/>                                                                                                                  |              |
| 140 | Does this facility have designated spaces for each of the doctors/key service providers to provide services after initial triage/examination? | Yes.....1<br>No .....2<br>Not applicable.....3                                                                                                                                                                                                                 | <input type="checkbox"/>                                                                                                                  |              |
| 141 | Is there an on-call room/space where health care professionals can rest during their on-call?                                                 | Yes.....1<br>No .....2<br>Not applicable.....3                                                                                                                                                                                                                 | <input type="checkbox"/>                                                                                                                  |              |
| 142 | Does this facility have working telephone or shortwave radio to call outside?                                                                 | Yes.....1<br>No .....2                                                                                                                                                                                                                                         | <input type="checkbox"/>                                                                                                                  |              |
| 143 | Does this facility have ambulances?                                                                                                           | Yes.....1<br>No .....2                                                                                                                                                                                                                                         | <input type="checkbox"/>                                                                                                                  | If 2<br>→147 |
| 144 | How many ambulances does the facility have?                                                                                                   | Number                                                                                                                                                                                                                                                         | <input type="text"/>                                                                                                                      |              |
| 145 | Was there any time this year when the ambulance was not in service?                                                                           | Yes.....1<br>No .....2                                                                                                                                                                                                                                         | <input type="checkbox"/>                                                                                                                  |              |
| 146 | If yes, how many ambulances remained out of service and for how long on average over the last one year?                                       | A. How many were out of service even temporarily?<br>B. Average weeks of out-of-service                                                                                                                                                                        | <input type="text"/><br><input type="text"/>                                                                                              |              |
| 147 | Does the facility have any other vehicles like cars, motorcycles etc.?                                                                        | Yes.....1<br>No .....2                                                                                                                                                                                                                                         | <input type="checkbox"/>                                                                                                                  | If 2<br>→201 |
| 148 | How many vehicles does the facility have?                                                                                                     | Car<br><br>Motorcycles                                                                                                                                                                                                                                         | <input type="text"/><br><input type="text"/>                                                                                              |              |
| 149 | Principal use of vehicles and ambulances in past seven days                                                                                   | Transporting patients to facility.....1<br>Transporting patients from village/local area to facility.....2<br>For use by health facility administrators.....3<br>For conducting outreach service.....4<br>Transporting healthcare providers to the facility..5 | Ambulance<br><input type="text"/><br>Cars<br><input type="text"/><br>Motorcycles<br><input type="text"/><br>Boats<br><input type="text"/> |              |
| 150 | Who meets the costs for maintenance / servicing of the vehicles?                                                                              | Province.....1<br>District.....2<br>Own budget....3<br>Referral health facility ....4                                                                                                                                                                          | <input type="checkbox"/>                                                                                                                  |              |

## Section 2.1: Information on each of the buildings

| No  | Questions/ Items                                                            | Responses and codes                                                                                                                                                                                                   | Building/<br>Structure #1 | Building/<br>Structure #2 |
|-----|-----------------------------------------------------------------------------|-----------------------------------------------------------------------------------------------------------------------------------------------------------------------------------------------------------------------|---------------------------|---------------------------|
| 201 | Name of the structure/ building                                             |                                                                                                                                                                                                                       |                           |                           |
| 202 | Principal activities normally performed in the building/ structure          | Inpatient services.....1<br>Outpatient services.....2<br>Both inpatient and outpatient.....3<br>Lab/ diagnostic services.....4<br>Administrative offices.....5<br>Not used now.....6<br>Others _____.....8<br>Specify | <input type="checkbox"/>  | <input type="checkbox"/>  |
| 203 | Total floor space of the building                                           | Floor space in sq meters                                                                                                                                                                                              | <input type="text"/>      | <input type="text"/>      |
| 204 | Number of rooms in the structure (not including toilets, closets, hallways) | Number<br>Don't know: 998                                                                                                                                                                                             | <input type="text"/>      | <input type="text"/>      |
| 205 | Do windows and doors of the building need repairs?                          | No repairs needed .....1<br>Few repairs needed.....2<br>Many repairs needed.....3                                                                                                                                     | <input type="checkbox"/>  | <input type="checkbox"/>  |
| 206 | Do interior walls and roof of the building need repairs?                    | No repairs needed .....1<br>Few repairs needed.....2<br>Many repairs needed.....3                                                                                                                                     | <input type="checkbox"/>  | <input type="checkbox"/>  |
| 207 | Does electric supply system of the facility need repairs?                   | No repairs needed .....1<br>Few repairs needed.....2<br>Many repairs needed.....3                                                                                                                                     | <input type="checkbox"/>  | <input type="checkbox"/>  |
| 208 | Does water supply system of the facility need repair works?                 | No repairs needed .....1<br>Few repairs needed.....2<br>Many repairs needed.....3                                                                                                                                     | <input type="checkbox"/>  | <input type="checkbox"/>  |
| 209 | Does toilet (latrine) for clients' use of the facility need repair works?   | No repairs needed .....1<br>Few repairs needed.....2<br>Many repairs needed.....3<br>Not present.....4                                                                                                                | <input type="checkbox"/>  | <input type="checkbox"/>  |
| 210 | Number of toilets                                                           | Number<br>Don't know: 98                                                                                                                                                                                              | <input type="text"/>      | <input type="text"/>      |
| 211 | Are most of the toilets functional?                                         | Yes.....1<br>No .....2                                                                                                                                                                                                | <input type="checkbox"/>  | <input type="checkbox"/>  |
| 212 | Are the toilets clean?                                                      | Yes, all the toilets are clean.....1<br>Yes, most of the toilets are clean.....2<br>No, most are not clean.....3<br>No, all are unclean.....4                                                                         | <input type="checkbox"/>  | <input type="checkbox"/>  |
| 213 | How many rooms or areas in the building have water connection?              | Number<br>Don't know: 98                                                                                                                                                                                              | <input type="text"/>      | <input type="text"/>      |
| 214 | Are the water outlets are functional in toilet?                             | Yes.....1<br>No .....2                                                                                                                                                                                                | <input type="checkbox"/>  | <input type="checkbox"/>  |
| 215 | Floor space of waiting rooms/space for clients                              | Floor space in sq meters                                                                                                                                                                                              | <input type="text"/>      | <input type="text"/>      |
| 216 | How many seating spaces are there in waiting rooms/spaces?                  | Number<br>Don't know: 98                                                                                                                                                                                              | <input type="text"/>      | <input type="text"/>      |
| 217 | Are the waiting areas/rooms clean?                                          | Yes.....1<br>No .....2                                                                                                                                                                                                | <input type="checkbox"/>  | <input type="checkbox"/>  |
| 218 | Floor space of outpatient consultation (not including consultant's offices) | Floor space in sq meters                                                                                                                                                                                              | <input type="text"/>      | <input type="text"/>      |

| No  | Questions/ Items                                                                                                                        | Responses and codes       | Building/<br>Structure #1 | Building/<br>Structure #2 |
|-----|-----------------------------------------------------------------------------------------------------------------------------------------|---------------------------|---------------------------|---------------------------|
| 219 | Is there at least one site in the outpatient clinic area where both auditory and visual privacy can be maintained for client services?  | Yes.....1<br>No .....2    | <input type="checkbox"/>  | <input type="checkbox"/>  |
| 220 | Is the building is accessible to persons with disabilities (e.g., wheel chair ramps, elevators if more than one floor, hand rails etc.) | Yes.....1<br>No .....2    | <input type="checkbox"/>  | <input type="checkbox"/>  |
| 221 | Floor space in the emergency department including waiting space                                                                         | Floor space in sq meters  | _ _ _ _ _                 | _ _ _ _ _                 |
| 222 | Floor space for blood bank, blood donation space, etc.                                                                                  | Floor space in sq meters  | _ _ _ _ _                 | _ _ _ _ _                 |
| 223 | Number of observation beds in the building/ Structure (not including inpatient beds)                                                    | Number<br>Don't know: 998 | _ _ _ _                   | _ _ _ _                   |
| 224 | Number of inpatient wards in the building                                                                                               | Number<br>Don't know: 998 | _ _ _ _                   | _ _ _ _                   |
| 225 | Floor space of general adult wards                                                                                                      | Floor space in sq meters  | _ _ _ _ _                 | _ _ _ _ _                 |
| 226 | Number of inpatient beds in general adult wards (according to National Medical Standards)                                               | Number<br>Don't know: 998 | _ _ _ _                   | _ _ _ _                   |
| 227 | How many patients are in the general ward today?                                                                                        | Number<br>Don't know: 998 | _ _ _ _                   | _ _ _ _                   |
| 228 | Floor space of pediatric wards                                                                                                          | Floor space in sq meters  | _ _ _ _ _                 | _ _ _ _ _                 |
| 229 | Number of inpatient beds in pediatric wards                                                                                             | Number<br>Don't know: 998 | _ _ _ _                   | _ _ _ _                   |
| 230 | Number of beds in pediatric wards (according to National Medical Standards)                                                             | Number<br>Don't know: 998 | _ _ _ _                   | _ _ _ _                   |
| 231 | How many patients are in the pediatric ward today?                                                                                      | Number<br>Don't know: 998 | _ _ _ _                   | _ _ _ _                   |
| 232 | Floor space of surgery wards                                                                                                            | Floor space in sq meters  | _ _ _ _ _                 | _ _ _ _ _                 |
| 233 | Number of inpatient beds in surgery wards (according to National Medical Standards)                                                     | Number<br>Don't know: 998 | _ _ _ _                   | _ _ _ _                   |
| 234 | How many patients are in the surgery ward today?                                                                                        | Number<br>Don't know: 998 | _ _ _ _                   | _ _ _ _                   |
| 235 | Other wards (specify)<br>_____ward                                                                                                      | Floor space in sq meters  | _ _ _ _ _                 | _ _ _ _ _                 |
| 236 | Number of inpatient beds in<br>_____ward                                                                                                | Number<br>Don't know: 998 | _ _ _ _                   | _ _ _ _                   |
| 237 | How many patients are in the<br>_____ward today?                                                                                        | Number<br>Don't know: 998 | _ _ _ _                   | _ _ _ _                   |
| 238 | Other wards (specify)<br>_____ward                                                                                                      | Floor space in sq meters  | _ _ _ _ _                 | _ _ _ _ _                 |
| 239 | Number of inpatient beds in<br>_____ward                                                                                                | Number<br>Don't know: 998 | _ _ _ _                   | _ _ _ _                   |
| 240 | How many patients are in the<br>_____ward today?                                                                                        | Number<br>Don't know: 998 | _ _ _ _                   | _ _ _ _                   |



| No  | Questions/ Items                                                             | Responses and codes                                             | Building/<br>Structure #1 | Building/<br>Structure #2 |
|-----|------------------------------------------------------------------------------|-----------------------------------------------------------------|---------------------------|---------------------------|
| 241 | Condition of the mattresses on the beds?                                     | Good.....1<br>Not so good/not so bad.....2<br>Bad.....3         | <input type="checkbox"/>  | <input type="checkbox"/>  |
| 242 | Are there patients on floors in any of the wards or any other areas?         | Yes.....1<br>No .....2                                          | <input type="checkbox"/>  | <input type="checkbox"/>  |
| 243 | Are the inpatient areas clean?                                               | Yes.....1<br>No .....2                                          | <input type="checkbox"/>  | <input type="checkbox"/>  |
| 244 | Area of laboratory and diagnostic services including waiting areas           | Floor space in sq meters                                        | _ _ _ _ _ _ _             | _ _ _ _ _ _ _             |
| 245 | Are the lab/diagnostic services areas clean?                                 | Yes.....1<br>No .....2                                          | <input type="checkbox"/>  | <input type="checkbox"/>  |
| 246 | Area used for drug, supply and medical instrument storage                    | Floor space in sq meters                                        | _ _ _ _ _ _ _             | _ _ _ _ _ _ _             |
| 247 | Floor space in sq meters used for drug dispensing (if separate from storage) | Floor space in sq meters                                        | _ _ _ _ _ _ _             | _ _ _ _ _ _ _             |
| 248 | Floor space in sq meters of delivery rooms                                   | Floor space in sq meters                                        | _ _ _ _ _ _ _             | _ _ _ _ _ _ _             |
| 249 | How many delivery rooms are there in this building?                          | Number<br>Don't know: 998                                       | _ _ _ _ _ _ _             | _ _ _ _ _ _ _             |
| 250 | Are the delivery rooms equipped with delivery beds, lights, etc.?            | Yes.....1<br>No .....2                                          | <input type="checkbox"/>  | <input type="checkbox"/>  |
| 251 | Did the facility deliver babies in last seven days?                          | Yes.....1<br>No .....2                                          | <input type="checkbox"/>  | <input type="checkbox"/>  |
| 252 | Are the delivery rooms clean?                                                | Yes.....1<br>No .....2                                          | <input type="checkbox"/>  | <input type="checkbox"/>  |
| 253 | Floor space in sq meters of operation theaters                               | Floor space in sq meters                                        | _ _ _ _ _ _ _             | _ _ _ _ _ _ _             |
| 254 | How many operation theaters are there in the building?                       | Number<br>Don't know: 998                                       | _ _ _ _ _ _ _             | _ _ _ _ _ _ _             |
| 255 | Are the operation theaters functional and used regularly?                    | Yes.....1<br>No .....2                                          | <input type="checkbox"/>  | <input type="checkbox"/>  |
| 256 | Floor space in sq meters used by administrative personnel                    | Floor space in sq meters                                        | _ _ _ _ _ _ _             | _ _ _ _ _ _ _             |
| 257 | Floor space in sq meters used by laundry services                            | Floor space in sq meters                                        | _ _ _ _ _ _ _             | _ _ _ _ _ _ _             |
| 258 | Floor space in sq meters used by food services and kitchen                   | Floor space in sq meters                                        | _ _ _ _ _ _ _             | _ _ _ _ _ _ _             |
| 259 | Floor space in sq meters of cafeteria for employees and clients              | Floor space in sq meters                                        | _ _ _ _ _ _ _             | _ _ _ _ _ _ _             |
| 260 | Meeting and other common areas for the use of facility personnel             | Floor space in sq meters                                        | _ _ _ _ _ _ _             | _ _ _ _ _ _ _             |
| 261 | Floor space used by research projects/ NGOs and other external entities      | Floor space in sq meters<br>(EXCLUDE DIRECT PATIENT CARE AREAS) | _ _ _ _ _ _ _             | _ _ _ _ _ _ _             |
| 262 | Floor space in sq meters used by security personnel                          | Floor space in sq meters                                        | _ _ _ _ _ _ _             | _ _ _ _ _ _ _             |
| 263 | Floor space in sq meters used by mortuary                                    | Floor space in sq meters                                        | _ _ _ _ _ _ _             | _ _ _ _ _ _ _             |
| 264 | How many private rooms are there for inpatient stays?                        | Number of rooms<br>Don't know: 98                               | _ _ _ _ _ _ _             | _ _ _ _ _ _ _             |
| 265 | How many beds are there in the private rooms?                                | Number<br>Don't know: 998                                       | _ _ _ _ _ _ _             | _ _ _ _ _ _ _             |
| 266 | Floor space in sq meters used by private rooms                               | Floor space in sq meters                                        | _ _ _ _ _ _ _             | _ _ _ _ _ _ _             |

## Section 2: Information on each of the buildings (USE ADDITIONAL FORMS IF NEEDED)

| No  | Questions/ Items                                                            | Responses and codes                                                                                                                                                                                                   | Building/<br>Structure # _ _ | Building/<br>Structure # _ _ |
|-----|-----------------------------------------------------------------------------|-----------------------------------------------------------------------------------------------------------------------------------------------------------------------------------------------------------------------|------------------------------|------------------------------|
| 201 | Name of the structure/ building                                             |                                                                                                                                                                                                                       |                              |                              |
| 202 | Principal activities normally performed in the building/ structure          | Inpatient services.....1<br>Outpatient services.....2<br>Both inpatient and outpatient.....3<br>Lab/ diagnostic services.....4<br>Administrative offices.....5<br>Not used now.....6<br>Others _____.....8<br>Specify | <input type="checkbox"/>     | <input type="checkbox"/>     |
| 203 | Total floor space of the building                                           | Floor space in sq meters                                                                                                                                                                                              | _ _ _ _                      | _ _ _ _                      |
| 204 | Number of rooms in the structure (not including toilets, closets, hallways) | Number<br>Don't know: 998                                                                                                                                                                                             | _ _ _ _                      | _ _ _ _                      |
| 205 | Do windows and doors of the building need repairs?                          | No repairs needed .....1<br>Few repairs needed.....2<br>Many repairs needed.....3                                                                                                                                     | <input type="checkbox"/>     | <input type="checkbox"/>     |
| 206 | Do interior walls and roof of the building need repairs?                    | No repairs needed .....1<br>Few repairs needed.....2<br>Many repairs needed.....3                                                                                                                                     | <input type="checkbox"/>     | <input type="checkbox"/>     |
| 207 | Does electric supply system of the facility need repairs?                   | No repairs needed .....1<br>Few repairs needed.....2<br>Many repairs needed.....3                                                                                                                                     | <input type="checkbox"/>     | <input type="checkbox"/>     |
| 208 | Does water supply system of the facility need repair works?                 | No repairs needed .....1<br>Few repairs needed.....2<br>Many repairs needed.....3                                                                                                                                     | <input type="checkbox"/>     | <input type="checkbox"/>     |
| 209 | Does toilet (latrine) for clients' use of the facility need repair works?   | No repairs needed .....1<br>Few repairs needed.....2<br>Many repairs needed.....3<br>Not present.....4                                                                                                                | <input type="checkbox"/>     | <input type="checkbox"/>     |
| 210 | Number of toilets                                                           | Number<br>Don't know: 98                                                                                                                                                                                              | _ _                          | _ _                          |
| 211 | Are most of the toilets functional?                                         | Yes.....1<br>No .....2                                                                                                                                                                                                | <input type="checkbox"/>     | <input type="checkbox"/>     |
| 212 | Are the toilets clean?                                                      | Yes, all the toilets are clean.....1<br>Yes, most of the toilets are clean.....2<br>No, most are not clean.....3<br>No, all are unclean.....4                                                                         | <input type="checkbox"/>     | <input type="checkbox"/>     |
| 213 | How many rooms or areas in the building have water connection?              | Number<br>Don't know: 98                                                                                                                                                                                              | _ _ _ _                      | _ _ _ _                      |
| 214 | Are the water outlets are functional in toilet?                             | Yes.....1<br>No .....2                                                                                                                                                                                                | <input type="checkbox"/>     | <input type="checkbox"/>     |
| 215 | Floor space of waiting rooms/space for clients                              | Floor space in sq meters                                                                                                                                                                                              | _ _ _ _                      | _ _ _ _                      |
| 216 | How many seating spaces are there in waiting rooms/spaces?                  | Number<br>Don't know: 98                                                                                                                                                                                              | _ _ _ _                      | _ _ _ _                      |
| 217 | Are the waiting areas/rooms clean?                                          | Yes.....1<br>No .....2                                                                                                                                                                                                | <input type="checkbox"/>     | <input type="checkbox"/>     |
| 218 | Floor space of outpatient consultation (not including consultant's offices) | Floor space in sq meters                                                                                                                                                                                              | _ _ _ _                      | _ _ _ _                      |

| No  | Questions/ Items                                                                                                                        | Responses and codes       | Building/<br>Structure # _ _ | Building/<br>Structure # _ _ |
|-----|-----------------------------------------------------------------------------------------------------------------------------------------|---------------------------|------------------------------|------------------------------|
| 219 | Is there at least one site in the outpatient clinic area where both auditory and visual privacy can be maintained for client services?  | Yes.....1<br>No .....2    | <input type="checkbox"/>     | <input type="checkbox"/>     |
| 220 | Is the building is accessible to persons with disabilities (e.g., wheel chair ramps, elevators if more than one floor, hand rails etc.) | Yes.....1<br>No .....2    | <input type="checkbox"/>     | <input type="checkbox"/>     |
| 221 | Floor space in the emergency department including waiting space                                                                         | Floor space in sq meters  | _ _ _ _                      | _ _ _ _                      |
| 222 | Floor space for blood bank, blood donation space, etc.                                                                                  | Floor space in sq meters  | _ _ _ _                      | _ _ _ _                      |
| 223 | Number of observation beds in the building/ Structure (not including inpatient beds)                                                    | Number<br>Don't know: 998 | _ _ _                        | _ _ _                        |
| 224 | Number of inpatient wards in the building                                                                                               | Number<br>Don't know: 998 | _ _ _                        | _ _ _                        |
| 225 | Floor space of general adult wards                                                                                                      | Floor space in sq meters  | _ _ _ _                      | _ _ _ _                      |
| 226 | Number of inpatient beds in general adult wards (according to National Medical Standards)                                               | Number<br>Don't know: 998 | _ _ _                        | _ _ _                        |
| 227 | How many patients are in the general ward today?                                                                                        | Number<br>Don't know: 998 | _ _ _                        | _ _ _                        |
| 228 | Floor space of pediatric wards                                                                                                          | Floor space in sq meters  | _ _ _ _                      | _ _ _ _                      |
| 229 | Number of inpatient beds in pediatric wards                                                                                             | Number<br>Don't know: 998 | _ _ _                        | _ _ _                        |
| 230 | Number of beds in pediatric wards (according to National Medical Standards)                                                             | Number<br>Don't know: 998 | _ _ _                        | _ _ _                        |
| 231 | How many patients are in the pediatric ward today?                                                                                      | Number<br>Don't know: 998 | _ _ _                        | _ _ _                        |
| 232 | Floor space of surgery wards                                                                                                            | Floor space in sq meters  | _ _ _ _                      | _ _ _ _                      |
| 233 | Number of inpatient beds in surgery wards (according to National Medical Standards)                                                     | Number<br>Don't know: 998 | _ _ _                        | _ _ _                        |
| 234 | How many patients are in the surgery ward today?                                                                                        | Number<br>Don't know: 998 | _ _ _                        | _ _ _                        |
| 235 | Other wards (specify)<br>_____ ward                                                                                                     | Floor space in sq meters  | _ _ _ _                      | _ _ _ _                      |
| 236 | Number of inpatient beds in<br>_____ ward                                                                                               | Number<br>Don't know: 998 | _ _ _                        | _ _ _                        |
| 237 | How many patients are in the<br>_____ ward today?                                                                                       | Number<br>Don't know: 998 | _ _ _                        | _ _ _                        |
| 238 | Other wards (specify)<br>_____ ward                                                                                                     | Floor space in sq meters  | _ _ _ _                      | _ _ _ _                      |
| 239 | Number of inpatient beds in<br>_____ ward                                                                                               | Number<br>Don't know: 998 | _ _ _                        | _ _ _                        |
| 240 | How many patients are in the<br>_____ ward today?                                                                                       | Number<br>Don't know: 998 | _ _ _                        | _ _ _                        |

| No  | Questions/ Items                                                             | Responses and codes                                             | Building/<br>Structure # _ _ | Building/<br>Structure # _ _ |
|-----|------------------------------------------------------------------------------|-----------------------------------------------------------------|------------------------------|------------------------------|
| 241 | Condition of the mattresses on the beds?                                     | Good.....1<br>Not so good/not so bad.....2<br>Bad.....3         | <input type="checkbox"/>     | <input type="checkbox"/>     |
| 242 | Are there patients on floors in any of the wards or any other areas?         | Yes.....1<br>No .....2                                          | <input type="checkbox"/>     | <input type="checkbox"/>     |
| 243 | Are the inpatient areas clean?                                               | Yes.....1<br>No .....2                                          | <input type="checkbox"/>     | <input type="checkbox"/>     |
| 244 | Area of laboratory and diagnostic services including waiting areas           | Floor space in sq meters                                        | _ _ _ _ _                    | _ _ _ _ _                    |
| 245 | Are the lab/diagnostic services areas clean?                                 | Yes.....1<br>No .....2                                          | <input type="checkbox"/>     | <input type="checkbox"/>     |
| 246 | Area used for drug, supply and medical instrument storage                    | Floor space in sq meters                                        | _ _ _ _ _                    | _ _ _ _ _                    |
| 247 | Floor space in sq meters used for drug dispensing (if separate from storage) | Floor space in sq meters                                        | _ _ _ _ _                    | _ _ _ _ _                    |
| 248 | Floor space in sq meters of delivery rooms                                   | Floor space in sq meters                                        | _ _ _ _ _                    | _ _ _ _ _                    |
| 249 | How many delivery rooms are there in this building?                          | Number<br>Don't know: 998                                       | _ _ _ _                      | _ _ _ _                      |
| 250 | Are the delivery rooms equipped with delivery beds, lights, etc.?            | Yes.....1<br>No .....2                                          | <input type="checkbox"/>     | <input type="checkbox"/>     |
| 251 | Did the facility deliver babies in last seven days?                          | Yes.....1<br>No .....2                                          | <input type="checkbox"/>     | <input type="checkbox"/>     |
| 252 | Are the delivery rooms clean?                                                | Yes.....1<br>No .....2                                          | <input type="checkbox"/>     | <input type="checkbox"/>     |
| 253 | Floor space in sq meters of operation theaters                               | Floor space in sq meters                                        | _ _ _ _ _                    | _ _ _ _ _                    |
| 254 | How many operation theaters are there in the building?                       | Number<br>Don't know: 998                                       | _ _ _ _                      | _ _ _ _                      |
| 255 | Are the operation theaters functional and used regularly?                    | Yes.....1<br>No .....2                                          | <input type="checkbox"/>     | <input type="checkbox"/>     |
| 256 | Floor space in sq meters used by administrative personnel                    | Floor space in sq meters                                        | _ _ _ _ _                    | _ _ _ _ _                    |
| 257 | Floor space in sq meters used by laundry services                            | Floor space in sq meters                                        | _ _ _ _ _                    | _ _ _ _ _                    |
| 258 | Floor space in sq meters used by food services and kitchen                   | Floor space in sq meters                                        | _ _ _ _ _                    | _ _ _ _ _                    |
| 259 | Floor space in sq meters of cafeteria for employees and clients              | Floor space in sq meters                                        | _ _ _ _ _                    | _ _ _ _ _                    |
| 260 | Meeting and other common areas for the use of facility personnel             | Floor space in sq meters                                        | _ _ _ _ _                    | _ _ _ _ _                    |
| 261 | Floor space used by research projects/ NGOs and other external entities      | Floor space in sq meters<br>(EXCLUDE DIRECT PATIENT CARE AREAS) | _ _ _ _ _                    | _ _ _ _ _                    |
| 262 | Floor space in sq meters used by security personnel                          | Floor space in sq meters                                        | _ _ _ _ _                    | _ _ _ _ _                    |
| 263 | Floor space in sq meters used by mortuary                                    | Floor space in sq meters                                        | _ _ _ _ _                    | _ _ _ _ _                    |
| 264 | How many private rooms are there for inpatient stays?                        | Number of rooms<br>Don't know: 98                               | _ _ _                        | _ _ _                        |
| 265 | How many beds are there in the private rooms?                                | Number<br>Don't know: 998                                       | _ _ _ _                      | _ _ _ _                      |
| 266 | Floor space in sq meters used by private rooms                               | Floor space in sq meters                                        | _ _ _ _ _                    | _ _ _ _ _                    |

## Section 3: Communications between this health facility and a referral facility

| No  | Questions and Filters                                                                                                 | Coding categories                                                                                                                                                                                  | Response                                                             | Skip |
|-----|-----------------------------------------------------------------------------------------------------------------------|----------------------------------------------------------------------------------------------------------------------------------------------------------------------------------------------------|----------------------------------------------------------------------|------|
| 301 | How far is the closest referral facility from this facility?                                                          | Kilometers<br>Don't know..... 998<br>Not applicable..... 999                                                                                                                                       | <input type="text"/>                                                 |      |
| 302 | What type of facility is that (the referral facility)?                                                                | NH..... 1<br>RH..... 2<br>PH..... 3<br>DH..... 4<br>Other..... 9                                                                                                                                   | <input type="checkbox"/>                                             |      |
| 303 | On the average, how many patients are referred to other facilities in a month from this facility?                     | Number of patients referred<br>Don't know..... 998                                                                                                                                                 | <input type="text"/>                                                 |      |
| 304 | How long does it take to transfer sick patients to the referral hospital if transported by ambulance (hours and days) | Hours and/or days                                                                                                                                                                                  | <input type="text"/> hours<br><input type="text"/> days              |      |
| 305 | What is the average cost per trip for the patients, please specify                                                    | A. Travel person: _____ PNG kina<br>B. Accommodation per person: _____ PNG kina<br>C. Per diem per person _____ PNG kina                                                                           | <input type="text"/><br><input type="text"/><br><input type="text"/> |      |
| 306 | Do you budget specifically for patient transfers?                                                                     | Yes..... 1<br>No..... 2                                                                                                                                                                            | <input type="checkbox"/>                                             |      |
| 307 | Were the referred patients treated at the referral facility?                                                          | Yes..... 1<br>No..... 2<br>Some, but not all..... 3<br>Don't know..... 8                                                                                                                           | <input type="checkbox"/>                                             |      |
| 308 | Did the referral facilities refer some of the referred patients to another facility?                                  | Yes..... 1<br>No..... 2<br>Don't know..... 8                                                                                                                                                       | <input type="checkbox"/>                                             |      |
| 309 | What is the mode of communication between this facility and the usual referral center?                                | No formal communication system..... 1<br>Only discharge card..... 2<br>Telephone or mobile phone..... 3<br>Two Way Radio..... 4<br>Other means..... 9<br>(specify)                                 | <input type="checkbox"/>                                             |      |
| 310 | What is the most common form of transport when referring patients?                                                    | Using the facility's ambulance/vehicle..... 1<br>Using commercially available cars..... 2<br>Using vans..... 3<br>Using boats..... 4<br>Plane/helicopter..... 5<br>Other means..... 9<br>(specify) | <input type="checkbox"/>                                             |      |
| 311 | Does a health worker travel with a sick patient to the referral hospital?                                             | Yes..... 1<br>No..... 2                                                                                                                                                                            | <input type="checkbox"/>                                             |      |
| 312 | Does the referral hospital have to verbally confirm they will accept the patient before they can be transferred?      | Yes..... 1<br>No..... 2                                                                                                                                                                            | <input type="checkbox"/>                                             |      |

## Section 4: Repair and Medical Waste Management

| No  | Questions and Filters                                                                                                 | Coding categories                                                                                                                                                                                                                                                                  | Response                 | Skip         |
|-----|-----------------------------------------------------------------------------------------------------------------------|------------------------------------------------------------------------------------------------------------------------------------------------------------------------------------------------------------------------------------------------------------------------------------|--------------------------|--------------|
| 401 | Who should be responsible for ensuring infrastructure maintenance is carried out?                                     | Province.....1<br>District.....2<br>Church agency.....3<br>This facility.....4<br>Referral health facility .....5                                                                                                                                                                  | <input type="checkbox"/> |              |
| 402 | Is it desirable for other maintenance (i.e. anything other than really simple tasks) being managed at a higher level? | Yes .....1<br>No .....2                                                                                                                                                                                                                                                            | <input type="checkbox"/> | If 2<br>→404 |
| 403 | If yes, by who?                                                                                                       | Province.....1<br>District.....2<br>Church agency.....3<br>This facility.....4<br>Referral health facility .....5                                                                                                                                                                  | <input type="checkbox"/> |              |
| 404 | Who should be responsible for ensuring basic utilities are maintained at the health facility?                         | Province.....1<br>District.....2<br>Church agency.....3<br>This facility.....4<br>Referral health facility .....5                                                                                                                                                                  | <input type="checkbox"/> |              |
| 405 | Comments on repair needs or types of repair problems of the facility:                                                 |                                                                                                                                                                                                                                                                                    |                          |              |
|     | <b>Medical waste treatment</b> Verify use if incinerator use log is available                                         |                                                                                                                                                                                                                                                                                    |                          |              |
| 406 | Is there any incinerator (high temperature) available in the facility?                                                | Available and used.....1<br>Available but not used .....2<br>Not available.....3                                                                                                                                                                                                   | <input type="checkbox"/> |              |
| 407 | Is there any incinerator (1 chamber drum/brick) available in the facility?                                            | Available and used.....1<br>Available but not used .....2<br>Not available.....3                                                                                                                                                                                                   | <input type="checkbox"/> |              |
| 408 | Is there any burial pit for waste available in the facility?                                                          | Available and used.....1<br>Available but not used .....2<br>Not available.....3                                                                                                                                                                                                   | <input type="checkbox"/> |              |
| 409 | Is there any system of segregating medical wastes into three colored waste baskets available in the facility?         | Available and used.....1<br>Available but not used .....2<br>Not available.....3                                                                                                                                                                                                   | <input type="checkbox"/> |              |
| 410 | Disposal practice of sharps (needles, glass, surgical instruments, etc.)                                              | Incinerator .....1<br>Burn and bury.....2<br>Bury but do not burn.....3<br>Burn but do not bury.....4<br>Put in a covered pit (could be latrine).....5<br>Put in an open pit .....6<br>Store, collect and move offsite .....7<br>Just throw out in the open .....8<br>Other .....9 | <input type="checkbox"/> |              |
| 411 | Disposal practice of biomedical wastes (placenta, human body parts, laboratory waste, etc.)                           | Incinerator .....1<br>Burn and bury.....2<br>Bury but do not burn.....3<br>Burn but do not bury.....4<br>Put in a covered pit (could be latrine).....5<br>Put in an open pit .....6<br>Store, collect and move offsite .....7<br>Just throw out in the open .....8<br>Other .....9 | <input type="checkbox"/> |              |

## Section 5: Food Services and Kitchen Area

| Food Services and availability |                                                                                                                        |                                                                                                                       |                          |               |
|--------------------------------|------------------------------------------------------------------------------------------------------------------------|-----------------------------------------------------------------------------------------------------------------------|--------------------------|---------------|
| No                             | Questions and Filters                                                                                                  | Coding categories                                                                                                     | Response                 | Skip          |
| 501                            | Do you provide food service to inpatients?                                                                             | Yes.....1<br>No.....2                                                                                                 | <input type="checkbox"/> | If 2<br>→ 601 |
| 502                            | Do you charge inpatients any money for food?                                                                           | Yes .....1<br>No .....2                                                                                               | <input type="checkbox"/> |               |
| 503                            | How much do you charge for food per person per day?                                                                    | PGKina.<br>(000 if patients are not charged)                                                                          | _ _ _ _                  |               |
| 504                            | What is the cost of food per person per day?                                                                           | PGKina                                                                                                                | _ _ _ _                  |               |
| 505                            | Number of patients who were served with food yesterday?                                                                | Number of patients#                                                                                                   | _ _ _ _                  |               |
| 506                            | Is there a protocol for feeding hospitalized infants (<1 year)?                                                        | Yes.....1<br>No.....2                                                                                                 | <input type="checkbox"/> |               |
| 507                            | How many meals are typically provided for infants in 24 hours?                                                         | Two to three times.....1<br>Four to five times.....2<br>Six times or more.....3                                       | <input type="checkbox"/> |               |
| 508                            | Is the budget allocated for food service enough for buying groceries and other needs for all patients in the facility? | Yes .....1<br>No.....2                                                                                                | <input type="checkbox"/> |               |
| 509                            | Does the facility contract out food services?                                                                          | Yes, only grocery procurement contracted out.....1<br>Yes, cooking +other food services contracted out..2<br>No.....3 | <input type="checkbox"/> |               |
| 510                            | Is the food prepared on-site or prepared outside the facility?                                                         | Prepared in the facility .....1<br>Not prepared in the facility.....2                                                 | <input type="checkbox"/> | If 2<br>→ 601 |
| 511                            | Is there a chimney or working exhaust fan in cooking area?                                                             | Yes .....1<br>No.....2                                                                                                | <input type="checkbox"/> |               |
| 512                            | Is soap/detergent present in cooking area for washing hands?                                                           | Yes .....1<br>No.....2                                                                                                | <input type="checkbox"/> |               |
| 513                            | Is soap/detergent present for washing pots, pans, plates, utensils                                                     | Yes .....1<br>No.....2                                                                                                | <input type="checkbox"/> |               |
| 514                            | Is the kitchen floor clean (no garbage on floor)?                                                                      | Yes .....1<br>No.....2                                                                                                | <input type="checkbox"/> |               |
| 515                            | Is the wiping cloth used in the kitchen is clean, not smelly?                                                          | Yes .....1<br>No.....2                                                                                                | <input type="checkbox"/> |               |
| 516                            | Are there signs of cockroach/mice infestation in the kitchen area?                                                     | Yes .....1<br>No.....2                                                                                                | <input type="checkbox"/> |               |
| 517                            | Do cooking personnel tie hair back and/or wear caps?                                                                   | Yes .....1<br>No.....2                                                                                                | <input type="checkbox"/> |               |
| 518                            | Do cooks wear gloves while handling food?                                                                              | Yes .....1<br>No.....2                                                                                                | <input type="checkbox"/> |               |
| 519                            | Are prepared foods covered?                                                                                            | Yes .....1<br>No.....2                                                                                                | <input type="checkbox"/> |               |



**Section 6: Services and other supplies**  
**Section 6.1: Maternal and neonatal care: Antenatal care**

|                                                                                                                                                                               | Questions and Filters                                                                                                          | Coding categories                                                                                                   | Response                 | Skip       |
|-------------------------------------------------------------------------------------------------------------------------------------------------------------------------------|--------------------------------------------------------------------------------------------------------------------------------|---------------------------------------------------------------------------------------------------------------------|--------------------------|------------|
| 601                                                                                                                                                                           | Are Antenatal services provided at this facility?                                                                              | Yes.....1<br>No.....2                                                                                               | <input type="checkbox"/> | If 2 → 604 |
| 602                                                                                                                                                                           | How many days in a week the facility provide ANC?                                                                              | #Days in a week                                                                                                     | <input type="text"/>     |            |
| 603                                                                                                                                                                           | Number of antenatal outreach clinics held in the last 3 months?                                                                | Number of outreach clinics held<br>Don't know.....998                                                               | <input type="text"/>     |            |
| <b>Antenatal clinic equipment and supplies:</b> check to see whether the following items are present and functional in or near the area where antenatal services are provided |                                                                                                                                |                                                                                                                     |                          |            |
| 604                                                                                                                                                                           | Fetal stethoscope (or foetal monitor)                                                                                          | A. Number<br>B. Number Working<br>C. Number regularly used                                                          | <input type="text"/>     |            |
| 605                                                                                                                                                                           | Stethoscope and blood pressure cuff                                                                                            | A. Number<br>B. Number Working<br>C. Number regularly used                                                          | <input type="text"/>     |            |
| 606                                                                                                                                                                           | Tape measure                                                                                                                   | A. Number<br>B. Number Working<br>C. Number regularly used                                                          | <input type="text"/>     |            |
| 607                                                                                                                                                                           | Scale                                                                                                                          | A. Number<br>B. Number Working<br>C. Number regularly used                                                          | <input type="text"/>     |            |
| 608                                                                                                                                                                           | Ultrasound Machine (and gel)                                                                                                   | A. Number<br>B. Number Working<br>C. Number regularly used                                                          | <input type="text"/>     |            |
| <b>MATERNAL AND NEONATAL CARE: Deliveries.</b>                                                                                                                                |                                                                                                                                |                                                                                                                     |                          |            |
| <i>Ask the in charge to assist you with questions in this section.</i>                                                                                                        |                                                                                                                                |                                                                                                                     |                          |            |
| 609                                                                                                                                                                           | Does the facility staff assist with deliveries, either in the facility or in the community?                                    | Yes ..... 1<br>No.....2                                                                                             | <input type="checkbox"/> | If 2 → 611 |
| 610                                                                                                                                                                           | Does the facility staff assist with deliveries only in the facility, only in the community, or in both facility and community? | Only in facility ..... 1<br>Only in community.....2<br>Both in facility and community.....3                         | <input type="checkbox"/> |            |
| 611                                                                                                                                                                           | Does this facility have the capacity to administer antibiotics, oxytocics, and anticonvulsants for delivery of babies?         | Yes, can do all of the three .....1<br>Can do two of the three .....2<br>Can do one of the three .....3<br>No.....4 | <input type="checkbox"/> |            |
| 612                                                                                                                                                                           | Does this facility have the ability/capacity for manual removal of the placenta?                                               | Yes, can do now ..... 1<br>Usually, but nit now ..... 2<br>Does not have the capacity ..... 3                       | <input type="checkbox"/> |            |
| 613                                                                                                                                                                           | Does this facility have the capacity to remove retained products following miscarriage or abortion?                            | Yes, can do now ..... 1<br>Usually, but not now ..... 2<br>Does not have the capacity ..... 3                       | <input type="checkbox"/> |            |
| 614                                                                                                                                                                           | Does this facility have the capacity to do assisted vaginal delivery, preferably with vacuum extractor?                        | Yes, can do now ..... 1<br>Usually, but not now ..... 2<br>Does not have the capacity ..... 3                       | <input type="checkbox"/> |            |
| 615                                                                                                                                                                           | Does the facility have the capacity to provide newborn care?                                                                   | Yes, can do now ..... 1<br>Usually, but not now ..... 2<br>Does not have the capacity ..... 3                       | <input type="checkbox"/> |            |
| 616                                                                                                                                                                           | Does the facility have the capacity to manage caesarean section?                                                               | Yes, can do now ..... 1<br>Usually, but not now ..... 2<br>Does not have the capacity ..... 3                       | <input type="checkbox"/> |            |



|                       |                                                                                                                                      |                                                                                                                                          |                                                                                            |                                                                                  |  |
|-----------------------|--------------------------------------------------------------------------------------------------------------------------------------|------------------------------------------------------------------------------------------------------------------------------------------|--------------------------------------------------------------------------------------------|----------------------------------------------------------------------------------|--|
| 1<br>2<br>3<br>4<br>5 | 617                                                                                                                                  | Does the facility have the capacity to do safe blood transfusion?                                                                        | Yes, can do now .....1<br>Usually, but not now .....2<br>Does not have the capacity .....3 | <input type="checkbox"/>                                                         |  |
| 6<br>7<br>8           | 618                                                                                                                                  | Does the facility have the capacity to administer anesthesia?                                                                            | Yes, can do now .....1<br>Usually, but not now .....2<br>Does not have the capacity .....3 | <input type="checkbox"/>                                                         |  |
| 9<br>10<br>11         | 619                                                                                                                                  | Does the facility have the capacity to care for sick and low-birth weight newborns, including resuscitation?                             | Yes, can do now .....1<br>Usually, but not now .....2<br>Does not have the capacity .....3 | <input type="checkbox"/>                                                         |  |
| 12<br>13<br>14<br>15  | 620                                                                                                                                  | Does the facility have at least two skilled attendants covering 24 hours a day and seven days a week, assisted by trained support staff? | Yes .....1<br>No .....2                                                                    | <input type="checkbox"/>                                                         |  |
| 16                    | <b>MATERNAL AND NEONATAL CARE: Delivery room equipment and supplies</b>                                                              |                                                                                                                                          |                                                                                            |                                                                                  |  |
| 17                    | <i>Check to see whether the following items are present and functional in or near the delivery room.</i>                             |                                                                                                                                          |                                                                                            |                                                                                  |  |
| 18<br>19<br>20        | 621                                                                                                                                  | Delivery kit (instruments, supplies)                                                                                                     | Present and complete ..... 1<br>Present but not complete ..... 2<br>Not present .....3     | <input type="checkbox"/>                                                         |  |
| 21                    | <i>check to see whether the following items are present and functional in or near the area where antenatal services are provided</i> |                                                                                                                                          |                                                                                            |                                                                                  |  |
| 22<br>23<br>24<br>25  | 622                                                                                                                                  | Stethoscope                                                                                                                              | A. Number<br>B. Number Working<br>C. Number regularly used                                 | <input type="checkbox"/><br><input type="checkbox"/><br><input type="checkbox"/> |  |
| 26<br>27<br>28        | 623                                                                                                                                  | Partograph                                                                                                                               | A. Number<br>B. Number Working<br>C. Number regularly used                                 | <input type="checkbox"/><br><input type="checkbox"/><br><input type="checkbox"/> |  |
| 29<br>30<br>31        | 624                                                                                                                                  | Pelvic procedure instruments like speculum                                                                                               | A. Number<br>B. Number Working<br>C. Number regularly used                                 | <input type="checkbox"/><br><input type="checkbox"/><br><input type="checkbox"/> |  |
| 32<br>33<br>34        | 625                                                                                                                                  | Delivery light                                                                                                                           | A. Number<br>B. Number Working<br>C. Number regularly used                                 | <input type="checkbox"/><br><input type="checkbox"/><br><input type="checkbox"/> |  |
| 35<br>36<br>37        | 626                                                                                                                                  | Sterilizer                                                                                                                               | A. Number<br>B. Number Working<br>C. Number regularly used                                 | <input type="checkbox"/><br><input type="checkbox"/><br><input type="checkbox"/> |  |
| 38<br>39<br>40        | 627                                                                                                                                  | Vacuum extractor                                                                                                                         | A. Number<br>B. Number Working<br>C. Number regularly used                                 | <input type="checkbox"/><br><input type="checkbox"/><br><input type="checkbox"/> |  |
| 41<br>42<br>43        | 628                                                                                                                                  | Forceps                                                                                                                                  | A. Number<br>B. Number Working<br>C. Number regularly used                                 | <input type="checkbox"/><br><input type="checkbox"/><br><input type="checkbox"/> |  |
| 44<br>45<br>46        | 629                                                                                                                                  | Manual vacuum aspirator/suction bulb                                                                                                     | A. Number<br>B. Number Working<br>C. Number regularly used                                 | <input type="checkbox"/><br><input type="checkbox"/><br><input type="checkbox"/> |  |
| 47<br>48<br>49        | 630                                                                                                                                  | Resuscitation bag , newborn                                                                                                              | A. Number<br>B. Number Working<br>C. Number regularly used                                 | <input type="checkbox"/><br><input type="checkbox"/><br><input type="checkbox"/> |  |
| 50<br>51<br>52        | 631                                                                                                                                  | Eye drops or ointment for newborn                                                                                                        | A. Number<br>B. Number Working<br>C. Number regularly used                                 | <input type="checkbox"/><br><input type="checkbox"/><br><input type="checkbox"/> |  |
| 53<br>54<br>55        | 632                                                                                                                                  | Needles and syringes (10-20 cc)                                                                                                          | A. Number<br>B. Number Working<br>C. Number regularly used                                 | <input type="checkbox"/><br><input type="checkbox"/><br><input type="checkbox"/> |  |

|                                                    |                                                       |                                                                                                                                                                                                                                                                |                                                                      |               |
|----------------------------------------------------|-------------------------------------------------------|----------------------------------------------------------------------------------------------------------------------------------------------------------------------------------------------------------------------------------------------------------------|----------------------------------------------------------------------|---------------|
| 633                                                | Sterile C-section instrument kits                     | A. Number<br>B. Number Working<br>C. Number regularly used                                                                                                                                                                                                     | <input type="text"/><br><input type="text"/><br><input type="text"/> |               |
| 634                                                | Cord supplies for new born: clamps, ties, scissors    | A. Number<br>B. Number Working<br>C. Number regularly used                                                                                                                                                                                                     | <input type="text"/><br><input type="text"/><br><input type="text"/> |               |
| 635                                                | IV sets, including sterilized needle and tube         | A. Number<br>B. Number Working<br>C. Number regularly used                                                                                                                                                                                                     | <input type="text"/><br><input type="text"/><br><input type="text"/> |               |
| 636                                                | IV fluids, including normal saline and ringer lactate | A. Number<br>B. Number Working<br>C. Number regularly used                                                                                                                                                                                                     | <input type="text"/><br><input type="text"/><br><input type="text"/> |               |
| <b>MATERNAL AND NEONATAL CARE: Postpartum Care</b> |                                                       |                                                                                                                                                                                                                                                                |                                                                      |               |
| 637                                                | Are postpartum care services offered routinely?       | Yes, in the facility as part of routine services only.....1<br>Yes, in the facility as part of routine services and in special clinics...2<br>NO, not as part of routine services but only in special clinics.....3<br>NO, not offered at this facility .....4 | <input type="checkbox"/>                                             | If 4<br>→ 645 |
| <b>Are the following services provided?</b>        |                                                       |                                                                                                                                                                                                                                                                |                                                                      |               |
| 638                                                | Maternal examination & treatment                      | Yes ..... 1<br>No..... 2                                                                                                                                                                                                                                       | <input type="checkbox"/>                                             |               |
| 639                                                | Breast feeding counseling                             | Yes ..... 1<br>No..... 2                                                                                                                                                                                                                                       | <input type="checkbox"/>                                             |               |
| 640                                                | Newborn examination & treatment                       | Yes ..... 1<br>No..... 2                                                                                                                                                                                                                                       | <input type="checkbox"/>                                             |               |
| 641                                                | Growth Monitoring & promotion                         | Yes ..... 1<br>No..... 2                                                                                                                                                                                                                                       | <input type="checkbox"/>                                             |               |
| 642                                                | Vaccination counseling                                | Yes ..... 1<br>No..... 2                                                                                                                                                                                                                                       | <input type="checkbox"/>                                             |               |
| 643                                                | Family planning counseling                            | Yes ..... 1<br>No..... 2                                                                                                                                                                                                                                       | <input type="checkbox"/>                                             |               |
| 644                                                | Treatment of severe malnutrition                      | Yes ..... 1<br>No..... 2                                                                                                                                                                                                                                       | <input type="checkbox"/>                                             |               |

**Section 6.2: Protocols, Guidelines and Templates**

*Ask to see the protocols and guidelines and check to see which of the following are present.*

| No  | Questions and Filters                                  | Coding categories                     | Response                 | Skip |
|-----|--------------------------------------------------------|---------------------------------------|--------------------------|------|
| 645 | IMCI chart book or wall chart                          | Present ..... 1<br>Not Present..... 2 | <input type="checkbox"/> |      |
| 646 | ARI (NOT PART OF IMCI)                                 | Present ..... 1<br>Not Present..... 2 | <input type="checkbox"/> |      |
| 647 | Diagnosis and treatment of diarrhea (NOT PART OF IMCI) | Present ..... 1<br>Not Present..... 2 | <input type="checkbox"/> |      |
| 648 | Graphs for growth monitoring                           | Present ..... 1<br>Not Present..... 2 | <input type="checkbox"/> |      |
| 649 | Treatment of severe malnutrition                       | Present ..... 1<br>Not Present..... 2 | <input type="checkbox"/> |      |
| 650 | Tuberculosis diagnosis and treatment                   | Present ..... 1<br>Not Present..... 2 | <input type="checkbox"/> |      |
| 651 | NHIS guidelines                                        | Present ..... 1<br>Not Present..... 2 | <input type="checkbox"/> |      |

|     |                                            |                                       |                          |  |
|-----|--------------------------------------------|---------------------------------------|--------------------------|--|
| 652 | Malaria Protocol                           | Present ..... 1<br>Not Present..... 2 | <input type="checkbox"/> |  |
| 653 | Immunization schedule                      | Present ..... 1<br>Not Present..... 2 | <input type="checkbox"/> |  |
| 654 | Family planning                            | Present ..... 1<br>Not Present..... 2 | <input type="checkbox"/> |  |
| 655 | Are patient education materials displayed? | Present ..... 1<br>Not Present..... 2 | <input type="checkbox"/> |  |

### Section 6.3: Laboratory tests

| <i>Ask to see the protocols and guidelines and check to see which of the following are present.</i> |                                                                      |                                                                                                                               |                          |              |
|-----------------------------------------------------------------------------------------------------|----------------------------------------------------------------------|-------------------------------------------------------------------------------------------------------------------------------|--------------------------|--------------|
| No                                                                                                  | Questions and Filters                                                | Coding categories                                                                                                             | Response                 | Skip         |
| 656                                                                                                 | Malaria tests (Malaria RDT)                                          | Able to do this test today ..... 1<br>Able to do this test in past 6 months but not today....2<br>Cannot do this test ..... 3 | <input type="checkbox"/> |              |
| 657                                                                                                 | Does this facility perform laboratory tests other than malaria test? | Yes ..... 1<br>No..... 2                                                                                                      | <input type="checkbox"/> | If 2<br>→670 |
| 658                                                                                                 | Anemia testing                                                       | Able to do this test today ..... 1<br>Able to do this test in past 6 months but not today....2<br>Cannot do this test ..... 3 | <input type="checkbox"/> |              |
| 659                                                                                                 | Urine for R/M/E                                                      | Able to do this test today ..... 1<br>Able to do this test in past 6 months but not today....2<br>Cannot do this test ..... 3 | <input type="checkbox"/> |              |
| 660                                                                                                 | Blood Glucose                                                        | Able to do this test today ..... 1<br>Able to do this test in past 6 months but not today....2<br>Cannot do this test ..... 3 | <input type="checkbox"/> |              |
| 661                                                                                                 | Stool for RE                                                         | Able to do this test today ..... 1<br>Able to do this test in past 6 months but not today....2<br>Cannot do this test ..... 3 | <input type="checkbox"/> |              |
| 662                                                                                                 | HIV Testing                                                          | Able to do this test today ..... 1<br>Able to do this test in past 6 months but not today....2<br>Cannot do this test ..... 3 | <input type="checkbox"/> |              |
| 663                                                                                                 | TB Smears                                                            | Able to do this test today ..... 1<br>Able to do this test in past 6 months but not today....2<br>Cannot do this test ..... 3 | <input type="checkbox"/> |              |
| 664                                                                                                 | Gram Stains                                                          | Able to do this test today ..... 1<br>Able to do this test in past 6 months but not today....2<br>Cannot do this test ..... 3 | <input type="checkbox"/> |              |
| 665                                                                                                 | Blood Typing and cross matching                                      | Able to do this test today ..... 1<br>Able to do this test in past 6 months but not today....2<br>Cannot do this test ..... 3 | <input type="checkbox"/> |              |
| 666                                                                                                 | Syphilis testing                                                     | Able to do this test today ..... 1<br>Able to do this test in past 6 months but not today....2<br>Cannot do this test ..... 3 | <input type="checkbox"/> |              |
| 667                                                                                                 | Liver function testing                                               | Able to do this test today ..... 1<br>Able to do this test in past 6 months but not today....2<br>Cannot do this test ..... 3 | <input type="checkbox"/> |              |
| 668                                                                                                 | Pregnancy testing                                                    | Able to do this test today ..... 1<br>Able to do this test in past 6 months but not today....2<br>Cannot do this test ..... 3 | <input type="checkbox"/> |              |
| 669                                                                                                 | Hepatitis                                                            | Able to do this test today ..... 1<br>Able to do this test in past 6 months but not today....2<br>Cannot do this test ..... 3 | <input type="checkbox"/> |              |

## Section 6.4: Pharmacy room, drug storage area and supply system

| No  | Questions and Filters                                                                                                        | Coding categories                                                                                                                                                                                                                                                                                                      | Response                 | Skip          |
|-----|------------------------------------------------------------------------------------------------------------------------------|------------------------------------------------------------------------------------------------------------------------------------------------------------------------------------------------------------------------------------------------------------------------------------------------------------------------|--------------------------|---------------|
| 670 | Is there a separate room/space for drug storage?                                                                             | Yes ..... 1<br>No ..... 2                                                                                                                                                                                                                                                                                              | <input type="checkbox"/> | If 2<br>→ 749 |
| 671 | Are doors and windows secured in the drug storage area?                                                                      | Yes ..... 1<br>No ..... 2                                                                                                                                                                                                                                                                                              | <input type="checkbox"/> |               |
| 672 | Drug storage area has ventilation?                                                                                           | Yes ..... 1<br>No ..... 2                                                                                                                                                                                                                                                                                              | <input type="checkbox"/> |               |
| 673 | Are there enough shelves for storing drugs/other supplies (nothing on the floor)?                                            | Yes ..... 1<br>No ..... 2                                                                                                                                                                                                                                                                                              | <input type="checkbox"/> |               |
| 674 | Are the stored items protected from sun?                                                                                     | Yes ..... 1<br>No ..... 2                                                                                                                                                                                                                                                                                              | <input type="checkbox"/> |               |
| 675 | Are the stored items protected from rain?                                                                                    | Yes ..... 1<br>No ..... 2                                                                                                                                                                                                                                                                                              | <input type="checkbox"/> |               |
| 676 | Is/are there functioning refrigerator/s for storing drugs?                                                                   | Yes ..... 1<br>No ..... 2                                                                                                                                                                                                                                                                                              | <input type="checkbox"/> |               |
| 677 | How many boxes of drugs did you receive in the last six months (Push system)?                                                | Number of Boxes                                                                                                                                                                                                                                                                                                        | <input type="text"/>     |               |
| 678 | When do you think you might get next batch of boxes (Push system)?                                                           | Less than 2 weeks ..... 1<br>2 weeks to 1 month ..... 2<br>1 to 2 months ..... 3<br>More than 2 months ..... 4                                                                                                                                                                                                         | <input type="checkbox"/> |               |
| 679 | Currently, do you or your staff order medicines for the health facility?                                                     | Yes ..... 1<br>No ..... 2                                                                                                                                                                                                                                                                                              | <input type="checkbox"/> |               |
| 680 | If yes, from where do you order most of the drugs used in the facility?                                                      | Referral health facility / Hospital ..... 1<br>Provincial / district health office ..... 2<br>Area Medical store ..... 3<br>Provincial Medical Store ..... 4<br>NDoH ..... 5                                                                                                                                           | <input type="checkbox"/> |               |
| 681 | When did you order drugs last time?                                                                                          | Less than a month ago ..... 1<br>1 month to less than 2 months ..... 2<br>2 months to less than 3 months ..... 3<br>3 months to less than 4 months ..... 4<br>4 months to less than 6 months ..... 5<br>6 months to less than 9 months ..... 6<br>9 months to less than 1 year ..... 7<br>More than 1 year ago ..... 8 | <input type="checkbox"/> |               |
| 682 | Where did you order for the drug last time?                                                                                  | Referral health facility / Hospital ..... 1<br>Provincial / district health office ..... 2<br>Area Medical store ..... 3<br>Provincial Medical Store ..... 4<br>NDoH ..... 5                                                                                                                                           | <input type="checkbox"/> |               |
| 683 | The previous order you received (not the last order), how long it took for the drugs to arrive after the placement of order? | Less than 2 weeks ..... 1<br>2 weeks to 1 month ..... 2<br>1 to 2 months ..... 3<br>More than 2 months ..... 4                                                                                                                                                                                                         | <input type="checkbox"/> |               |
| 684 | Do you always get the drugs you ordered?                                                                                     | Yes ..... 1<br>No ..... 2                                                                                                                                                                                                                                                                                              | <input type="checkbox"/> | If 2<br>→ 691 |
| 685 | On average, what percentage of drugs ordered are received?                                                                   | Percent of drugs ordered received                                                                                                                                                                                                                                                                                      | <input type="text"/>     |               |

|                                          |                                                                                                                                                             |                                                                                                                                                   |                             |  |
|------------------------------------------|-------------------------------------------------------------------------------------------------------------------------------------------------------------|---------------------------------------------------------------------------------------------------------------------------------------------------|-----------------------------|--|
| 686                                      | Who normally makes the collection from the facility?                                                                                                        | Community health worker.....1<br>Volunteer.....2<br>Nurse.....3<br>Brought to the facility by suppliers.....4                                     | <input type="checkbox"/>    |  |
| 687                                      | How is the drug delivered to the facility?                                                                                                                  | Facility gets the drug from medical store/NDoH....1<br>Medical store/NDoH delivers to the facility.....2<br>Others deliver to the facility .....3 | <input type="checkbox"/>    |  |
| 688                                      | How do you pay the expenses for collecting drugs ordered?                                                                                                   | Province.....1<br>Own budget.....2<br>Referral health facility .....3<br>Others .....4                                                            | <input type="checkbox"/>    |  |
| 689                                      | How much does it cost (all expenses) on one average pick up?                                                                                                | PNG Kina<br>Don't Know: 99999                                                                                                                     | _ _ _ _                     |  |
| 690                                      | Where did you go last time to collect medical supplies?                                                                                                     | Please specify                                                                                                                                    | _ _ _                       |  |
| <b>Medical Supply Kits (Push System)</b> |                                                                                                                                                             |                                                                                                                                                   |                             |  |
| 691                                      | What month and year did you receive your last round of medical supply kits?                                                                                 | Month<br>Year                                                                                                                                     | _ _ <br> _ _                |  |
| 692                                      | Were the medical supply kits delivered directly or did the facility pick up the kits?                                                                       | Delivered .....1<br>Picked up.....2                                                                                                               | <input type="checkbox"/>    |  |
| 693                                      | List three drugs that you think are more than enough based on needs here in the facility<br>WRITE NAME AND CODE OF THE DRUGS FROM THE SUPPLY KITS DRUG LIST | A _____<br>B _____<br>C _____                                                                                                                     | _ _ _ <br> _ _ _ <br> _ _ _ |  |
| 694                                      | List three drugs that you think are not enough based on needs in the facility?<br>WRITE NAME AND CODE OF THE DRUGS FROM THE SUPPLY KITS DRUG LIST           | A _____<br>B _____<br>C _____                                                                                                                     | _ _ _ <br> _ _ _ <br> _ _ _ |  |
| <b>Purchased Drugs</b>                   |                                                                                                                                                             |                                                                                                                                                   |                             |  |
| 695                                      | Have you purchased additional medicines or medical supplies this year?                                                                                      | Yes .....1<br>No .....2                                                                                                                           | <input type="checkbox"/>    |  |
| 696                                      | If yes, how did you pay for this purchase?                                                                                                                  | Request province.....1<br>Own budget.....2<br>Referral health facility .....3                                                                     | <input type="checkbox"/>    |  |
| 697                                      | How much did you spend on additional drugs in 2014?                                                                                                         | PNG Kina                                                                                                                                          | _ _ _ _                     |  |
| 698                                      | Are you planning on purchasing additional drugs in 2015?                                                                                                    | Yes .....1<br>No .....2                                                                                                                           | <input type="checkbox"/>    |  |

## Section 7.1: Availability of Essential Drugs or supplies

| SL # | Drug                                          | Question                                                                 | Response                 | Question                                                                  | Response                 |
|------|-----------------------------------------------|--------------------------------------------------------------------------|--------------------------|---------------------------------------------------------------------------|--------------------------|
|      |                                               | <b>Drugs continuously available last 30 days without any stock-outs?</b> | <b>A</b>                 | <b>Are expired drug present?</b>                                          | <b>B</b>                 |
| 701  | Panadol/ Paracetamol tablet                   | Yes .....1<br>No .....2                                                  | <input type="checkbox"/> | Yes.....1<br>No .....2<br>No expiry date ...3<br>Drug is not present ...4 | <input type="checkbox"/> |
| 702  | Paracetamol liquid                            | Yes .....1<br>No .....2                                                  | <input type="checkbox"/> | Yes.....1<br>No .....2<br>No expiry date ...3<br>Drug is not present ...4 | <input type="checkbox"/> |
| 703  | Diclofenac (pain/inflammation) capsule or tab | Yes .....1<br>No .....2                                                  | <input type="checkbox"/> | Yes.....1<br>No .....2<br>No expiry date ...3<br>Drug is not present ...4 | <input type="checkbox"/> |
| 704  | Pethidine                                     | Yes .....1<br>No .....2                                                  | <input type="checkbox"/> | Yes.....1<br>No .....2<br>No expiry date ...3<br>Drug is not present ...4 | <input type="checkbox"/> |
| 705  | Chloroquine                                   | Yes .....1<br>No .....2                                                  | <input type="checkbox"/> | Yes.....1<br>No .....2<br>No expiry date ...3<br>Drug is not present ...4 | <input type="checkbox"/> |
| 706  | Quinine Injection                             | Yes .....1<br>No .....2                                                  | <input type="checkbox"/> | Yes.....1<br>No .....2<br>No expiry date ...3<br>Drug is not present ...4 | <input type="checkbox"/> |
| 707  | Primaquine                                    | Yes .....1<br>No .....2                                                  | <input type="checkbox"/> | Yes.....1<br>No .....2<br>No expiry date ...3<br>Drug is not present ...4 | <input type="checkbox"/> |
| 708  | Amodiaquine                                   | Yes .....1<br>No .....2                                                  | <input type="checkbox"/> | Yes.....1<br>No .....2<br>No expiry date ...3<br>Drug is not present ...4 | <input type="checkbox"/> |
| 709  | Artemisinin combination                       | Yes .....1<br>No .....2                                                  | <input type="checkbox"/> | Yes.....1<br>No .....2<br>No expiry date ...3<br>Drug is not present ...4 | <input type="checkbox"/> |
| 710  | Fansidar                                      | Yes .....1<br>No .....2                                                  | <input type="checkbox"/> | Yes.....1<br>No .....2<br>No expiry date ...3<br>Drug is not present ...4 | <input type="checkbox"/> |
| 711  | Sulfadoxine tab.                              | Yes .....1<br>No .....2                                                  | <input type="checkbox"/> | Yes.....1<br>No .....2<br>No expiry date ...3<br>Drug is not present ...4 | <input type="checkbox"/> |
| 712  | Pyrimethamine tab.                            | Yes .....1<br>No .....2                                                  | <input type="checkbox"/> | Yes.....1<br>No .....2<br>No expiry date ...3<br>Drug is not present ...4 | <input type="checkbox"/> |

| SL # | Drug             | Question                                                                 | Response                 | Question                                                                  | Response                 |
|------|------------------|--------------------------------------------------------------------------|--------------------------|---------------------------------------------------------------------------|--------------------------|
|      |                  | <b>Drugs continuously available last 30 days without any stock-outs?</b> | <b>A</b>                 | <b>Are expired drug present?</b>                                          | <b>B</b>                 |
| 713  | Rifampicin       | Yes .....1<br>No .....2                                                  | <input type="checkbox"/> | Yes.....1<br>No .....2<br>No expiry date ...3<br>Drug is not present ...4 | <input type="checkbox"/> |
| 714  | Isoniazid        | Yes .....1<br>No .....2                                                  | <input type="checkbox"/> | Yes.....1<br>No .....2<br>No expiry date ...3<br>Drug is not present ...4 | <input type="checkbox"/> |
| 715  | Ethambutol       | Yes .....1<br>No .....2                                                  | <input type="checkbox"/> | Yes.....1<br>No .....2<br>No expiry date ...3<br>Drug is not present ...4 | <input type="checkbox"/> |
| 716  | Pyrazinamide     | Yes .....1<br>No .....2                                                  | <input type="checkbox"/> | Yes.....1<br>No .....2<br>No expiry date ...3<br>Drug is not present ...4 | <input type="checkbox"/> |
| 717  | Streptomycin     | Yes .....1<br>No .....2                                                  | <input type="checkbox"/> | Yes.....1<br>No .....2<br>No expiry date ...3<br>Drug is not present ...4 | <input type="checkbox"/> |
| 718  | TB blister packs | Yes .....1<br>No .....2                                                  | <input type="checkbox"/> | Yes.....1<br>No .....2<br>No expiry date ...3<br>Drug is not present ...4 | <input type="checkbox"/> |
| 719  | Oxytocin         | Yes .....1<br>No .....2                                                  | <input type="checkbox"/> | Yes.....1<br>No .....2<br>No expiry date ...3<br>Drug is not present ...4 | <input type="checkbox"/> |
| 720  | Ergometrine      | Yes .....1<br>No .....2                                                  | <input type="checkbox"/> | Yes.....1<br>No .....2<br>No expiry date ...3<br>Drug is not present ...4 | <input type="checkbox"/> |
| 721  | Lignocaine       | Yes .....1<br>No .....2                                                  | <input type="checkbox"/> | Yes.....1<br>No .....2<br>No expiry date ...3<br>Drug is not present ...4 | <input type="checkbox"/> |
| 722  | Depo-provera     | Yes .....1<br>No .....2                                                  | <input type="checkbox"/> | Yes.....1<br>No .....2<br>No expiry date ...3<br>Drug is not present ...4 | <input type="checkbox"/> |
| 723  | Ferrous sulphate | Yes .....1<br>No .....2                                                  | <input type="checkbox"/> | Yes.....1<br>No .....2<br>No expiry date ...3<br>Drug is not present ...4 | <input type="checkbox"/> |
| 724  | Liniment         | Yes .....1<br>No .....2                                                  | <input type="checkbox"/> | Yes.....1<br>No .....2<br>No expiry date ...3<br>Drug is not present ...4 | <input type="checkbox"/> |

| SL # | Drug                                                         | Question                                                                 | Response                 | Question                                                                  | Response                 |
|------|--------------------------------------------------------------|--------------------------------------------------------------------------|--------------------------|---------------------------------------------------------------------------|--------------------------|
|      |                                                              | <b>Drugs continuously available last 30 days without any stock-outs?</b> | <b>A</b>                 | <b>Are expired drug present?</b>                                          | <b>B</b>                 |
| 725  | Flagyl/ Metronidazole                                        | Yes .....1<br>No .....2                                                  | <input type="checkbox"/> | Yes.....1<br>No .....2<br>No expiry date ...3<br>Drug is not present ...4 | <input type="checkbox"/> |
| 726  | Amoxicillin capsule or tablet                                | Yes .....1<br>No .....2                                                  | <input type="checkbox"/> | Yes.....1<br>No .....2<br>No expiry date ...3<br>Drug is not present ...4 | <input type="checkbox"/> |
| 727  | Co-trimoxazole oral susp or tablet                           | Yes .....1<br>No .....2                                                  | <input type="checkbox"/> | Yes.....1<br>No .....2<br>No expiry date ...3<br>Drug is not present ...4 | <input type="checkbox"/> |
| 728  | Diazepam capsule or tablet                                   | Yes .....1<br>No .....2                                                  | <input type="checkbox"/> | Yes.....1<br>No .....2<br>No expiry date ...3<br>Drug is not present ...4 | <input type="checkbox"/> |
| 729  | Amitriptyline 25 mg, capsule or tablet (depression medicine) | Yes .....1<br>No .....2                                                  | <input type="checkbox"/> | Yes.....1<br>No .....2<br>No expiry date ...3<br>Drug is not present ...4 | <input type="checkbox"/> |
| 730  | Paraldehyde                                                  | Yes .....1<br>No .....2                                                  | <input type="checkbox"/> | Yes.....1<br>No .....2<br>No expiry date ...3<br>Drug is not present ...4 | <input type="checkbox"/> |
| 731  | Albendazole tab                                              | Yes .....1<br>No .....2                                                  | <input type="checkbox"/> | Yes.....1<br>No .....2<br>No expiry date ...3<br>Drug is not present ...4 | <input type="checkbox"/> |
| 732  | Tinidazole tab                                               | Yes .....1<br>No .....2                                                  | <input type="checkbox"/> | Yes.....1<br>No .....2<br>No expiry date ...3<br>Drug is not present ...4 | <input type="checkbox"/> |
| 733  | Ciprofloxacin capsule or tablet (usually 500 mg)             | Yes .....1<br>No .....2                                                  | <input type="checkbox"/> | Yes.....1<br>No .....2<br>No expiry date ...3<br>Drug is not present ...4 | <input type="checkbox"/> |
| 734  | Crystalline penicillin injection                             | Yes .....1<br>No .....2                                                  | <input type="checkbox"/> | Yes.....1<br>No .....2<br>No expiry date ...3<br>Drug is not present ...4 | <input type="checkbox"/> |
| 735  | Ceftriaxone 1g/vial injection                                | Yes .....1<br>No .....2                                                  | <input type="checkbox"/> | Yes.....1<br>No .....2<br>No expiry date ...3<br>Drug is not present ...4 | <input type="checkbox"/> |
| 736  | Chloramphenicol injection                                    | Yes .....1<br>No .....2                                                  | <input type="checkbox"/> | Yes.....1<br>No .....2<br>No expiry date ...3<br>Drug is not present ...4 | <input type="checkbox"/> |



| SL # | Drug                                                            | Question                                                                 | Response                 | Question                                                                  | Response                 |
|------|-----------------------------------------------------------------|--------------------------------------------------------------------------|--------------------------|---------------------------------------------------------------------------|--------------------------|
|      |                                                                 | <b>Drugs continuously available last 30 days without any stock-outs?</b> | <b>A</b>                 | <b>Are expired drug present?</b>                                          | <b>B</b>                 |
| 737  | Mala wan (1)                                                    | Yes .....1<br>No .....2                                                  | <input type="checkbox"/> | Yes.....1<br>No .....2<br>No expiry date ...3<br>Drug is not present ...4 | <input type="checkbox"/> |
| 738  | Captopril, 25 mg, capsule or tab                                | Yes .....1<br>No .....2                                                  | <input type="checkbox"/> | Yes.....1<br>No .....2<br>No expiry date ...3<br>Drug is not present ...4 | <input type="checkbox"/> |
| 739  | Atenolol 50 mg, capsule or tablet (Cardiovascular disease drug) | Yes .....1<br>No .....2                                                  | <input type="checkbox"/> | Yes.....1<br>No .....2<br>No expiry date ...3<br>Drug is not present ...4 | <input type="checkbox"/> |
| 740  | Simvastatin 20 mg, capsule or tablet                            | Yes .....1<br>No .....2                                                  | <input type="checkbox"/> | Yes.....1<br>No .....2<br>No expiry date ...3<br>Drug is not present ...4 | <input type="checkbox"/> |
| 741  | Glibenclamide 5mg, capsule or tablet (for diabetes)             | Yes .....1<br>No .....2                                                  | <input type="checkbox"/> | Yes.....1<br>No .....2<br>No expiry date ...3<br>Drug is not present ...4 | <input type="checkbox"/> |
| 742  | Salbutamol tab 4 mg                                             | Yes .....1<br>No .....2                                                  | <input type="checkbox"/> | Yes.....1<br>No .....2<br>No expiry date ...3<br>Drug is not present ...4 | <input type="checkbox"/> |
| 743  | CMP(Chlorpheniramine maleate) tablet                            | Yes .....1<br>No .....2                                                  | <input type="checkbox"/> | Yes.....1<br>No .....2<br>No expiry date ...3<br>Drug is not present ...4 | <input type="checkbox"/> |
| 744  | Omeprazole (capsule or tablet)                                  | Yes .....1<br>No .....2                                                  | <input type="checkbox"/> | Yes.....1<br>No .....2<br>No expiry date ...3<br>Drug is not present ...4 | <input type="checkbox"/> |
| 745  | ART for HIV/AIDS                                                | Yes .....1<br>No .....2                                                  | <input type="checkbox"/> | Yes.....1<br>No .....2<br>No expiry date ...3<br>Drug is not present ...4 | <input type="checkbox"/> |

**Table 7.2: Availability and Stock-out information of other supplies**

| SL #                                              |                             | Available for use today<br>(Yes=1, No=2) | Continuously available in the last 30 days<br>without any stock-outs? (Yes=1, No=2) |
|---------------------------------------------------|-----------------------------|------------------------------------------|-------------------------------------------------------------------------------------|
| Family Planning items                             |                             |                                          |                                                                                     |
| 749                                               | Family planning: Oral pills |                                          |                                                                                     |
| 750                                               | Family planning Injections  |                                          |                                                                                     |
| 751                                               | Condoms                     |                                          |                                                                                     |
| Vaccines and related items                        |                             |                                          |                                                                                     |
| 752                                               | BCG                         |                                          |                                                                                     |
| 753                                               | HEP B                       |                                          |                                                                                     |
| 754                                               | Vitamin A                   |                                          |                                                                                     |
| 755                                               | Sabin                       |                                          |                                                                                     |
| 756                                               | DTP/Hib                     |                                          |                                                                                     |
| 757                                               | Measles                     |                                          |                                                                                     |
| 758                                               | Tetanus Toxoid              |                                          |                                                                                     |
| 759                                               | Iron tablet or folic acid   |                                          |                                                                                     |
| Availability of Kits for Malaria, TB and HIV/AIDS |                             |                                          |                                                                                     |
| 760                                               | HIV/AIDS Test Kit           |                                          |                                                                                     |
| 761                                               | RDT Test kit for Malaria    |                                          |                                                                                     |
| 762                                               | TB Category 1 kit           |                                          |                                                                                     |
| 762                                               | TB Category 2 kit           |                                          |                                                                                     |
| Other items                                       |                             |                                          |                                                                                     |
| 763                                               | ORS for diarrhea            |                                          |                                                                                     |
| 764                                               | HS Darrows                  |                                          |                                                                                     |
| 765                                               | Oxygen                      |                                          |                                                                                     |
| 766                                               | Baby/scale book             |                                          |                                                                                     |
| 767                                               | Mother's health book        |                                          |                                                                                     |
| 768                                               | Quarterly TB report book    |                                          |                                                                                     |
| 769                                               | Monthly report forms        |                                          |                                                                                     |
| 770                                               | Health center record books  |                                          |                                                                                     |
| 771                                               | Daily summary book          |                                          |                                                                                     |

## Section 7.3: EPI and Cold Chain

| No  | Questions and Filters                                                                                                                        | Coding categories                                                                                                      | Response                 | Skip          |
|-----|----------------------------------------------------------------------------------------------------------------------------------------------|------------------------------------------------------------------------------------------------------------------------|--------------------------|---------------|
| 772 | Does this facility provide EPI services?                                                                                                     | Yes ..... 1<br>No ..... 2                                                                                              | <input type="checkbox"/> | If 2<br>→ 801 |
| 773 | Does this facility provide opportunistic immunizations (i.e., immunization provided when an unimmunized child shows up)?                     | Yes ..... 1<br>No ..... 2                                                                                              | <input type="checkbox"/> |               |
| 774 | Are child immunizations regularly given to children at this facility or in outreach EPI activities?                                          | Yes, at facility only ..... 1<br>Yes, at outreach only ..... 2<br>Yes, both facilities & outreach ..... 3              | <input type="checkbox"/> | If 1<br>→ 777 |
| 775 | How many EPI outreach activities were conducted in the past 3 months?                                                                        | Number EPI outreach activities                                                                                         | _ _ _                    |               |
| 776 | How many children were vaccinated during past three months and what proportion of total children was vaccinated through outreach activities? | A. Total immunized<br><br>B. % immunize through outreach                                                               | _ _ _ <br><br> _ _ _     |               |
| 777 | How is the main vaccine refrigerator powered?                                                                                                | None ..... 1<br>Fuel ..... 2<br>Electric ..... 3<br>Solar ..... 4<br>Gas ..... 5<br>Other ..... 6<br><i>Specify</i>    | <input type="checkbox"/> | If 1<br>→ 782 |
| 778 | Is the main vaccine refrigerator working?                                                                                                    | Yes ..... 1<br>No ..... 2                                                                                              | <input type="checkbox"/> |               |
| 779 | Is the main vaccine thermometer present and working?                                                                                         | Yes ..... 1<br>No ..... 2                                                                                              | <input type="checkbox"/> |               |
| 780 | Is a temperature log kept                                                                                                                    | At least twice a day for past 30 days ..... 1<br>Less than twice a day readings ..... 2<br>No vaccine log kept ..... 3 | <input type="checkbox"/> | If 1<br>→ 782 |
| 781 | # of days in the past month in which refrigerator temp over 8°C or under 0°C                                                                 | Number of days<br>Don't know ..... 98                                                                                  | _ _                      |               |
| 782 | Are most of the cold boxes/vaccine carriers functional /working?                                                                             | Almost all working ..... 1<br>Most not working ..... 2<br>Do not have ..... 3                                          | <input type="checkbox"/> |               |
| 783 | Are ice packs present and in good condition?                                                                                                 | Present, good condition ..... 1<br>Present, not good condition ..... 2<br>Not present ..... 3                          | <input type="checkbox"/> |               |
| 784 | Are adequate immunization cards present for at least 30 days? (Based on estimation by in-charge)                                             | Yes ..... 1<br>No ..... 2                                                                                              | <input type="checkbox"/> |               |

## Section 8.1 Health Outreach Patrols

| SL No | Questions and Filters                                                                                                                                          | Coding categories                                                                                                                                   | Response                                   | Skip         |
|-------|----------------------------------------------------------------------------------------------------------------------------------------------------------------|-----------------------------------------------------------------------------------------------------------------------------------------------------|--------------------------------------------|--------------|
| 801   | Does this facility conduct outreach patrols in the community?                                                                                                  | Yes ..... 1<br>No ..... 2                                                                                                                           | <input type="checkbox"/>                   | If 2<br>→822 |
| 802   | How many health outreach patrols to villages were planned in 2014?                                                                                             | Number of days<br>Don't know ..... 998                                                                                                              | _  _  _  _                                 |              |
| 803   | How many health outreach patrols to villages were conducted in 2014?                                                                                           | Number of days<br>Don't know ..... 998                                                                                                              | _  _  _  _                                 |              |
| 804   | How many for each of the following types conducted in 2014?                                                                                                    | A. Maternal and child health (MCH)<br>B. Immunization<br>C. Joint outreach clinics                                                                  | _  _  _  _<br>  _  _  _  _<br>  _  _  _  _ |              |
| 805   | If the number conducted is less than the number planned, what are the reasons?                                                                                 | Lack of funds ..... 1<br>Lack of fuel ..... 2<br>Lack of staff ..... 3<br>Unwillingness of staff to travel ..... 4                                  | <input type="checkbox"/>                   |              |
| 806   | How many villages/patrol sites are reached on a typical patrol?                                                                                                | Number<br>Don't know ..... 98                                                                                                                       | _  _  _  _                                 |              |
| 807   | What is the typical average time taken to conduct one patrol? i.e., how long are health workers normally away from the facility at a time.                     | Half day ..... 1<br>One day ..... 2<br>Two days ..... 3<br>Three days ..... 4<br>More than three days ..... 5                                       | <input type="checkbox"/>                   |              |
| 808   | Do health workers receive an allowance to go out on patrol?                                                                                                    | Yes .....<br>No ..... 2                                                                                                                             | <input type="checkbox"/>                   |              |
| 809   | If yes, how much per typical patrol?                                                                                                                           | PNG Kina<br>Don't know ..... 998                                                                                                                    | _  _  _  _  _  _  _  _                     |              |
| 810   | Are porters / volunteers / casual health staff used to help this facility carry out patrols?                                                                   | Yes ..... 1<br>No ..... 2                                                                                                                           | <input type="checkbox"/>                   |              |
| 811   | Is the health information gathered from conducting a patrol incorporated into monthly reporting for this health facility?                                      | Yes .....<br>No ..... 2                                                                                                                             | <input type="checkbox"/>                   |              |
| 812   | What proportion of total catchment population is served either through the facility or the outreach patrols in a quarter?                                      | Almost all served ..... 1<br>Majority served ..... 2<br>More than quarter served ..... 3<br>Less than quarter served ..... 4<br>None served ..... 5 | <input type="checkbox"/>                   |              |
| 813   | What proportion of total catchment population do you think live in "remote areas" (at least a day's walk from an operational road)?                            | % of population                                                                                                                                     | _  _  _  _                                 |              |
| 814   | What proportion of the "remote areas" population covered?                                                                                                      | % of population                                                                                                                                     | _  _  _  _                                 |              |
| 815   | Do you receive support and involvement from 'higher levels' (i.e. hospitals, district health office) such as doctors, specialists accompanying you on patrols? | Yes .....<br>No ..... 2                                                                                                                             | <input type="checkbox"/>                   |              |

| SL No | Questions and Filters                                                                                                                                            | Coding categories                                                                                                                                                     | Response                 | Skip         |
|-------|------------------------------------------------------------------------------------------------------------------------------------------------------------------|-----------------------------------------------------------------------------------------------------------------------------------------------------------------------|--------------------------|--------------|
| 816   | If yes, please specify the designation of that personnel<br>RECORD 1 IF THE PERSONNEL ACCOMPANIED AND 2 IF NOT ACCOMPANIED                                       | A. Doctor<br>B. Specialist<br>C. Administrators/ Managers<br>D. Other health personnel<br>E. Security personnel<br>F. Other _____<br>Specify                          |                          |              |
| 817   | In your opinion, has the system of conducting regular outreach patrols to rural and remote communities in the past five years gotten better, worse or stagnated? | Better.....1<br>Stagnated.....2<br>Worse.....3                                                                                                                        | <input type="checkbox"/> |              |
| 818   | The reasons for this change over the last five years<br>RECORD 1 IF THE REASON IS MENTIONED AND 2 IF NOT MENTIONED                                               | A. Availability of funds<br>B. Availability of transportation<br>C. Availability of staff<br>D. Weather<br>E. Unrest<br>F. Other _____<br>Specify                     |                          |              |
| 819   | If a health patrol finds very sick patients in remote areas, what action is normally taken?                                                                      | Ask community for help .....1<br>Call health centre.....2<br>Report back to health facility. ....3<br>Other, specify. ....4                                           | <input type="checkbox"/> |              |
| 820   | Do you have the means to respond immediately to the health emergency?                                                                                            | Yes .....1<br>No .....2                                                                                                                                               | <input type="checkbox"/> | If 2<br>→822 |
| 821   | How do you respond to health emergencies<br>RECORD 1 IF THE WAY IS MENTIONED AND 2 IF NOT MENTIONED                                                              | A. Call ambulance or vehicle to transport patient<br>B. Call specialist from the local hospital<br>C. Inform emergency situation to NDOH<br>D. Other _____<br>Specify |                          |              |

## Section 8.2: Administration and management

| SL No | Questions and Filters                                                                                                                                                       | Coding categories                                                                                                                        | Response                                     | Skip          |
|-------|-----------------------------------------------------------------------------------------------------------------------------------------------------------------------------|------------------------------------------------------------------------------------------------------------------------------------------|----------------------------------------------|---------------|
| 822   | How many health care providers arrived at the facility on time today (+/- 10 minutes)                                                                                       | Number of days<br>Don't know..... 9998                                                                                                   | <input type="text"/>                         |               |
| 823   | How many HEOs, nurses, midwives, and CHWs arrived on time at the facility today?                                                                                            | Number of days<br>Don't know..... 9998                                                                                                   | <input type="text"/>                         |               |
| 824   | How many doctors are present now?<br>RECORD "98" FOR THE NUMBER IF NOT KNOWN                                                                                                | A. Time now: Hour and Minute<br><br>C. Number present:                                                                                   | <input type="text"/><br><input type="text"/> |               |
| 825   | Are there enough official registers, stationery and other supplies?                                                                                                         | Yes ..... 1<br>No ..... 2                                                                                                                | <input type="checkbox"/>                     |               |
| 826   | Are there enough forms for the admission and discharge?                                                                                                                     | Yes ..... 1<br>No ..... 2<br>Not applicable ..... 2                                                                                      | <input type="checkbox"/>                     |               |
| 827   | How many meetings of the facility staff were held in past three months?                                                                                                     | Number<br>Don't know..... 98                                                                                                             | <input type="text"/>                         |               |
| 828   | Is there a Hospital/facility community advisory committee/Village Health Committees in this area?                                                                           | Yes..... 1<br>No..... 2                                                                                                                  | <input type="checkbox"/>                     | If 2<br>→ 831 |
| 829   | How many meetings of the Hospital/facility community advisory committee were held in past three months?                                                                     | Number held in past year<br>Don't know..... 998                                                                                          | <input type="text"/>                         |               |
| 830   | Does the facility have written records of activities carried out by the Hospital/facility community advisory committee?                                                     | Yes ..... 1<br>No ..... 2                                                                                                                | <input type="checkbox"/>                     |               |
| 831   | Is there an asset registry (equipment and furniture inventory)?<br><i>Ask to see the inventory; if health staff report having list but do not show it to you, circle 4.</i> | Yes..... 1<br>Present, not complete..... 2<br>Not present..... 3<br>Staff report having inventory but do not show it to surveyor ..... 4 | <input type="checkbox"/>                     |               |
| 832   | When was the last time inventory updated?                                                                                                                                   | Within last one month..... 1<br>With last three months..... 2<br>Within last six months..... 3<br>More than six months ago..... 4        | <input type="checkbox"/>                     |               |
| 833   | Did the health facility have to close for any reason this year?                                                                                                             | Yes ..... 1<br>No ..... 2                                                                                                                | <input type="checkbox"/>                     | If 2<br>→ 835 |
| 834   | If yes, how long and the reason for disruption in operations.                                                                                                               | A. Days remaining closed last year:<br><br>B. Reason (please specify): _____                                                             | <input type="text"/><br><input type="text"/> |               |

## Section 8.3: Supervision

| SL No | Questions and Filters                                                                                                                                                                                                                                                             | Coding categories                                                                                                                                                                                 | Response                 | Skip          |
|-------|-----------------------------------------------------------------------------------------------------------------------------------------------------------------------------------------------------------------------------------------------------------------------------------|---------------------------------------------------------------------------------------------------------------------------------------------------------------------------------------------------|--------------------------|---------------|
| 835   | Is there at least one officially assigned external supervisor for this health facility?                                                                                                                                                                                           | Yes.....1<br>No.....2                                                                                                                                                                             | <input type="checkbox"/> | If 2<br>→ 838 |
| 836   | What are the designations of the supervisors who visited the health facility in the last one year and how many times did they visit?<br>RECORD THE NUMBER OF VISITS FOR EACH KIND OF SUPERVISOR IN RESPONSE COLUMN AND RECORD 00 IF NO SUPERVISION DONE BY THAT TYPE OF PERSONNEL | A. Doctor<br>B. PHO<br>C. DHA<br>D. PDCO<br>E. Maternal and Child Health<br>F. Church Health Secretary<br>G. Other _____<br>Specify                                                               |                          |               |
| 837   | What were the purpose/ reasons for latest supervisor's visit?<br>RECORD 1 IF THE REASON MENTIONED AND 2 IF NOT MENTIONED                                                                                                                                                          | A. Overall activities in the facility<br>B. Drug Storage and Distribution<br>C. Auditing the finance<br>D. Maternal/Child health Services<br>E. Immunization program<br>F. Other _____<br>Specify |                          |               |
| 838   | Does a doctor work at this health facility?                                                                                                                                                                                                                                       | Yes.....1<br>No .....2                                                                                                                                                                            | <input type="checkbox"/> | If 1<br>→ 840 |
| 839   | If no, how many times has a doctor visited this health facility in 2014?                                                                                                                                                                                                          | Number<br>Don't know.....998                                                                                                                                                                      | _ _ _                    |               |
| 840   | Does a Health Extension Officer work at this health facility?                                                                                                                                                                                                                     | Yes.....1<br>No .....2                                                                                                                                                                            | <input type="checkbox"/> | If 1<br>→ 842 |
| 841   | If no, how many times did a Health Extension Officer (HEO) visit this health facility in 2014?                                                                                                                                                                                    | Number<br>Don't know.....998                                                                                                                                                                      | _ _ _                    |               |
| 842   | Does this health facility supervise aid posts / sub-health centers?                                                                                                                                                                                                               | Yes .....1<br>No.....2                                                                                                                                                                            | <input type="checkbox"/> | If 2<br>→ 844 |
| 843   | If yes, how many?                                                                                                                                                                                                                                                                 | Number<br>Don't know.....998                                                                                                                                                                      | _ _ _                    |               |
| 844   | How many supervisory visits were made to these clinics in 2014?                                                                                                                                                                                                                   | Number<br>Don't know.....998                                                                                                                                                                      | _ _ _                    |               |
| 845   | How are the costs for supervisory visits paid for at the health facility?                                                                                                                                                                                                         | Request province.....1<br>Request district.....2<br>Own budget.....3<br>Referral health facility .....4                                                                                           | <input type="checkbox"/> |               |
| 846   | Are any other tasks carried out in conjunction with conducting supervisory visits?<br>RECORD 1 IF THE TASK MENTIONED AND 2 IF NOT MENTIONED                                                                                                                                       | A. Consultation to patients<br>B. MCH services<br>C. Care in Well baby Clinic<br>D. Immunization services<br>E. Other _____<br>Specify                                                            |                          |               |
| 847   | Were recommendations written in a supervision book from last supervision?                                                                                                                                                                                                         | Book present, recommendations written.....1<br>Book present, No recommendations.....2<br>No book.....3                                                                                            | <input type="checkbox"/> |               |

## Section 8.4: Autonomy [Respondent: Health Facility Manager only]

| SL No | Questions and Filters                                                                                                                                            | Coding categories                                                                                                                                                                                                                                                                                                                                                     | Response                 | Skip |
|-------|------------------------------------------------------------------------------------------------------------------------------------------------------------------|-----------------------------------------------------------------------------------------------------------------------------------------------------------------------------------------------------------------------------------------------------------------------------------------------------------------------------------------------------------------------|--------------------------|------|
| 848   | What authority do you have to make decision on expenditure of funds provided to your facility?<br>RECORD 1 IF THE DECISION MENTIONED AND 2 IF NOT MENTIONED      | A. Total amount to be spent<br>B. Reallocation of money within same category<br>C. Reallocation between exp categories<br>D. Months in which expenditures can be made<br>E. Can sign cheques to pay suppliers and other vendors                                                                                                                                       |                          |      |
| 849   | Do you need preapprovals for exercising the authorities you have related to fund allocation?                                                                     | Yes ..... 1<br>No ..... 2                                                                                                                                                                                                                                                                                                                                             | <input type="checkbox"/> |      |
| 850   | What authority do you have in decisions related to facility personnel?<br>RECORD 1 IF THE DECISION MENTIONED AND 2 IF NOT MENTIONED                              | A. Disciplinary action/reporting for poor performance<br>B. Identify needs for additional / new staff<br>C. Hiring of new staff<br>D. Determine level of payment for staff<br>E. Allocating tasks/duties to existing staff<br>F. Commending staff for good performance<br>G. Promoting staff to higher position<br>H. Dismissal of staff<br>I. Other _____<br>Specify |                          |      |
| 851   | Do you need preapprovals for exercising the authorities you have related to fund allocation?                                                                     | Yes ..... 1<br>No ..... 2                                                                                                                                                                                                                                                                                                                                             | <input type="checkbox"/> |      |
| 852   | What authority do you have in decisions on the type/organizations of service provision?<br>RECORD 1 IF THE DECISION MENTIONED AND 2 IF NOT MENTIONED             | A. Planning the schedule of services<br>B. Changing the content of services delivered<br>C. Quality of services<br>D. Operating procedures<br>E. Procedures for accessing services<br>F. Charges for services<br>G. Addition of new services<br>H. Other _____<br>Specify                                                                                             |                          |      |
| 853   | For each area of authority: are you satisfied with the level of authority you have?                                                                              | Yes ..... 1<br>No ..... 2                                                                                                                                                                                                                                                                                                                                             | <input type="checkbox"/> |      |
| 854   | If not what type of authority you think you need for improving performance of the health facility?<br>RECORD 1 IF THE AUTHORITY MENTIONED AND 2 IF NOT MENTIONED | A. Authority to generate revenue for facility<br>B. Authority to allocate budget<br>C. Authority to hire and fire staff<br>D. Authority to give reward/punishment<br>E. Authority to plan<br>F. Authority of quality assurance<br>G. Other _____<br>Specify                                                                                                           |                          |      |



**Section 8.5: Barriers to managing facility**

|     |                                                                                                            |                  |   |
|-----|------------------------------------------------------------------------------------------------------------|------------------|---|
| 856 | What are the three main constraints you face in managing this facility effectively?                        | 1.               |   |
|     |                                                                                                            | 2.               |   |
|     |                                                                                                            | 3.               |   |
|     |                                                                                                            | No problem ..... | 9 |
| 857 | Please identify three ways in which the government or your organization could help you do your job better. | 1.               |   |
|     |                                                                                                            | 2.               |   |
|     |                                                                                                            | 3.               |   |
|     |                                                                                                            | No problem ..... | 9 |
| 858 | Suggest three ways of better involving the community with the health facility activities.                  | 1.               |   |
|     |                                                                                                            | 2.               |   |
|     |                                                                                                            | 3.               |   |
|     |                                                                                                            | No problem ..... | 9 |

**Section 8.6: Facility health information systems**

| Review records for the last completed month. |                             | Record the appropriate number in the "Response" column |                                      |                                          |                                                  |                | Response |
|----------------------------------------------|-----------------------------|--------------------------------------------------------|--------------------------------------|------------------------------------------|--------------------------------------------------|----------------|----------|
|                                              |                             | 1. Do not provide the service, no register             | 2. Register Present, fully completed | 3. Register Present, not fully completed | 4. Report having but did not show it to surveyor | 5. Not present |          |
| 859                                          | ANC register                | 1                                                      | 2                                    | 3                                        | 4                                                | 5              |          |
| 860                                          | Delivery/maternity register | 1                                                      | 2                                    | 3                                        | 4                                                | 5              |          |
| 861                                          | OT register                 | 1                                                      | 2                                    | 3                                        | 4                                                | 5              |          |
| 862                                          | Blood bank register         | 1                                                      | 2                                    | 3                                        | 4                                                | 5              |          |
| 863                                          | HIV Register                | 1                                                      | 2                                    | 3                                        | 4                                                | 5              |          |
| 864                                          | TB Register                 | 1                                                      | 2                                    | 3                                        | 4                                                | 5              |          |
| 865                                          | Hospital activity report    | 1                                                      | 2                                    | 3                                        | 4                                                | 5              |          |
| 866                                          | EPI report                  | 1                                                      | 2                                    | 3                                        | 4                                                | 5              |          |
| 867                                          | Family Planning report      | 1                                                      | 2                                    | 3                                        | 4                                                | 5              |          |
| 868                                          | Leprosy report              | 1                                                      | 2                                    | 3                                        | 4                                                | 5              |          |
| 869                                          | Lab register                | 1                                                      | 2                                    | 3                                        | 4                                                | 5              |          |
| 870                                          | Morbidity/ Mortality report | 1                                                      | 2                                    | 3                                        | 4                                                | 5              |          |
| 871                                          | Malaria, Kala-azar report   | 1                                                      | 2                                    | 3                                        | 4                                                | 5              |          |
| 872                                          | Notifiable Disease report   | 1                                                      | 2                                    | 3                                        | 4                                                | 5              |          |
| 873                                          | IMCI report                 | 1                                                      | 2                                    | 3                                        | 4                                                | 5              |          |
| 874                                          | Equipment status report     | 1                                                      | 2                                    | 3                                        | 4                                                | 5              |          |
| 875                                          | Other _____                 | 1                                                      | 2                                    | 3                                        | 4                                                | 5              |          |
| 876                                          | Other _____                 | 1                                                      | 2                                    | 3                                        | 4                                                | 5              |          |
| 877                                          | Other _____                 | 1                                                      | 2                                    | 3                                        | 4                                                | 5              |          |
| 878                                          | Other _____                 | 1                                                      | 2                                    | 3                                        | 4                                                | 5              |          |
| 879                                          | Other _____                 | 1                                                      | 2                                    | 3                                        | 4                                                | 5              |          |

**Section 9: Number of cases by disease or medical conditions for the latest month (based on the latest Health Center Monthly Summary Report available)**

| SL # | Question or items                                                                                                 | Response instructions                                                                                                                                             | Record Response                                                                                                                                                                                                                                                                     | Skip         |  |  |  |  |
|------|-------------------------------------------------------------------------------------------------------------------|-------------------------------------------------------------------------------------------------------------------------------------------------------------------|-------------------------------------------------------------------------------------------------------------------------------------------------------------------------------------------------------------------------------------------------------------------------------------|--------------|--|--|--|--|
| 901  | Does the facility have monthly reports available for review (either from facility or elsewhere)?                  | Yes.....1<br>No.....2                                                                                                                                             | <input type="checkbox"/>                                                                                                                                                                                                                                                            | If 2<br>→904 |  |  |  |  |
| 902  | The month and year of latest monthly report available in the facility or obtained from upper administrative level | Month (MM) and<br>Year (YY)                                                                                                                                       | <table border="1" style="display: inline-table; vertical-align: middle;"><tr><td style="width: 20px; height: 20px;"></td><td style="width: 20px; height: 20px;"></td></tr><tr><td style="width: 20px; height: 20px;"></td><td style="width: 20px; height: 20px;"></td></tr></table> |              |  |  |  |  |
|      |                                                                                                                   |                                                                                                                                                                   |                                                                                                                                                                                                                                                                                     |              |  |  |  |  |
|      |                                                                                                                   |                                                                                                                                                                   |                                                                                                                                                                                                                                                                                     |              |  |  |  |  |
| 903  | Is the latest monthly report complete?                                                                            | All fields are recorded/completed.....1<br>Most of the fields completed.....2<br>Most of the fields not completed.....3<br>Only very few items are recorded.....4 | <input type="checkbox"/>                                                                                                                                                                                                                                                            |              |  |  |  |  |

**Table 9.1: Outpatients (from monthly report)**

| SL No | Diseases                                 | Male (Number of cases)                                                                                                                                                                                                                                                                                                                     | Female (Number of cases)                                                                                                                                                                                                                                                                                                                   |  |  |  |  |  |                                                                                                                                                                                                                                                                                                                                            |  |  |  |  |  |  |
|-------|------------------------------------------|--------------------------------------------------------------------------------------------------------------------------------------------------------------------------------------------------------------------------------------------------------------------------------------------------------------------------------------------|--------------------------------------------------------------------------------------------------------------------------------------------------------------------------------------------------------------------------------------------------------------------------------------------------------------------------------------------|--|--|--|--|--|--------------------------------------------------------------------------------------------------------------------------------------------------------------------------------------------------------------------------------------------------------------------------------------------------------------------------------------------|--|--|--|--|--|--|
|       |                                          | A                                                                                                                                                                                                                                                                                                                                          | B                                                                                                                                                                                                                                                                                                                                          |  |  |  |  |  |                                                                                                                                                                                                                                                                                                                                            |  |  |  |  |  |  |
| 904   | Measles (suspected)                      | <table border="1" style="display: inline-table;"><tr><td style="width: 20px; height: 20px;"></td><td style="width: 20px; height: 20px;"></td></tr></table> |                                                                                                                                                                                                                                                                                                                                            |  |  |  |  |  | <table border="1" style="display: inline-table;"><tr><td style="width: 20px; height: 20px;"></td><td style="width: 20px; height: 20px;"></td></tr></table> |  |  |  |  |  |  |
|       |                                          |                                                                                                                                                                                                                                                                                                                                            |                                                                                                                                                                                                                                                                                                                                            |  |  |  |  |  |                                                                                                                                                                                                                                                                                                                                            |  |  |  |  |  |  |
|       |                                          |                                                                                                                                                                                                                                                                                                                                            |                                                                                                                                                                                                                                                                                                                                            |  |  |  |  |  |                                                                                                                                                                                                                                                                                                                                            |  |  |  |  |  |  |
| 905   | Pertussis                                | <table border="1" style="display: inline-table;"><tr><td style="width: 20px; height: 20px;"></td><td style="width: 20px; height: 20px;"></td></tr></table> |                                                                                                                                                                                                                                                                                                                                            |  |  |  |  |  | <table border="1" style="display: inline-table;"><tr><td style="width: 20px; height: 20px;"></td><td style="width: 20px; height: 20px;"></td></tr></table> |  |  |  |  |  |  |
|       |                                          |                                                                                                                                                                                                                                                                                                                                            |                                                                                                                                                                                                                                                                                                                                            |  |  |  |  |  |                                                                                                                                                                                                                                                                                                                                            |  |  |  |  |  |  |
|       |                                          |                                                                                                                                                                                                                                                                                                                                            |                                                                                                                                                                                                                                                                                                                                            |  |  |  |  |  |                                                                                                                                                                                                                                                                                                                                            |  |  |  |  |  |  |
| 906   | Simple cough                             | <table border="1" style="display: inline-table;"><tr><td style="width: 20px; height: 20px;"></td><td style="width: 20px; height: 20px;"></td></tr></table> |                                                                                                                                                                                                                                                                                                                                            |  |  |  |  |  | <table border="1" style="display: inline-table;"><tr><td style="width: 20px; height: 20px;"></td><td style="width: 20px; height: 20px;"></td></tr></table> |  |  |  |  |  |  |
|       |                                          |                                                                                                                                                                                                                                                                                                                                            |                                                                                                                                                                                                                                                                                                                                            |  |  |  |  |  |                                                                                                                                                                                                                                                                                                                                            |  |  |  |  |  |  |
|       |                                          |                                                                                                                                                                                                                                                                                                                                            |                                                                                                                                                                                                                                                                                                                                            |  |  |  |  |  |                                                                                                                                                                                                                                                                                                                                            |  |  |  |  |  |  |
| 907   | Pneumonia (<1 year)                      | <table border="1" style="display: inline-table;"><tr><td style="width: 20px; height: 20px;"></td><td style="width: 20px; height: 20px;"></td></tr></table> |                                                                                                                                                                                                                                                                                                                                            |  |  |  |  |  | <table border="1" style="display: inline-table;"><tr><td style="width: 20px; height: 20px;"></td><td style="width: 20px; height: 20px;"></td></tr></table> |  |  |  |  |  |  |
|       |                                          |                                                                                                                                                                                                                                                                                                                                            |                                                                                                                                                                                                                                                                                                                                            |  |  |  |  |  |                                                                                                                                                                                                                                                                                                                                            |  |  |  |  |  |  |
|       |                                          |                                                                                                                                                                                                                                                                                                                                            |                                                                                                                                                                                                                                                                                                                                            |  |  |  |  |  |                                                                                                                                                                                                                                                                                                                                            |  |  |  |  |  |  |
| 908   | Pneumonia ( 1-4 yrs)                     | <table border="1" style="display: inline-table;"><tr><td style="width: 20px; height: 20px;"></td><td style="width: 20px; height: 20px;"></td></tr></table> |                                                                                                                                                                                                                                                                                                                                            |  |  |  |  |  | <table border="1" style="display: inline-table;"><tr><td style="width: 20px; height: 20px;"></td><td style="width: 20px; height: 20px;"></td></tr></table> |  |  |  |  |  |  |
|       |                                          |                                                                                                                                                                                                                                                                                                                                            |                                                                                                                                                                                                                                                                                                                                            |  |  |  |  |  |                                                                                                                                                                                                                                                                                                                                            |  |  |  |  |  |  |
|       |                                          |                                                                                                                                                                                                                                                                                                                                            |                                                                                                                                                                                                                                                                                                                                            |  |  |  |  |  |                                                                                                                                                                                                                                                                                                                                            |  |  |  |  |  |  |
| 909   | Pneumonia ( 5 yrs+)                      | <table border="1" style="display: inline-table;"><tr><td style="width: 20px; height: 20px;"></td><td style="width: 20px; height: 20px;"></td></tr></table> |                                                                                                                                                                                                                                                                                                                                            |  |  |  |  |  | <table border="1" style="display: inline-table;"><tr><td style="width: 20px; height: 20px;"></td><td style="width: 20px; height: 20px;"></td></tr></table> |  |  |  |  |  |  |
|       |                                          |                                                                                                                                                                                                                                                                                                                                            |                                                                                                                                                                                                                                                                                                                                            |  |  |  |  |  |                                                                                                                                                                                                                                                                                                                                            |  |  |  |  |  |  |
|       |                                          |                                                                                                                                                                                                                                                                                                                                            |                                                                                                                                                                                                                                                                                                                                            |  |  |  |  |  |                                                                                                                                                                                                                                                                                                                                            |  |  |  |  |  |  |
| 910   | Chronic Obstructive Pulmonary Diseases   | <table border="1" style="display: inline-table;"><tr><td style="width: 20px; height: 20px;"></td><td style="width: 20px; height: 20px;"></td></tr></table> |                                                                                                                                                                                                                                                                                                                                            |  |  |  |  |  | <table border="1" style="display: inline-table;"><tr><td style="width: 20px; height: 20px;"></td><td style="width: 20px; height: 20px;"></td></tr></table> |  |  |  |  |  |  |
|       |                                          |                                                                                                                                                                                                                                                                                                                                            |                                                                                                                                                                                                                                                                                                                                            |  |  |  |  |  |                                                                                                                                                                                                                                                                                                                                            |  |  |  |  |  |  |
|       |                                          |                                                                                                                                                                                                                                                                                                                                            |                                                                                                                                                                                                                                                                                                                                            |  |  |  |  |  |                                                                                                                                                                                                                                                                                                                                            |  |  |  |  |  |  |
| 911   | Asthma                                   | <table border="1" style="display: inline-table;"><tr><td style="width: 20px; height: 20px;"></td><td style="width: 20px; height: 20px;"></td></tr></table> |                                                                                                                                                                                                                                                                                                                                            |  |  |  |  |  | <table border="1" style="display: inline-table;"><tr><td style="width: 20px; height: 20px;"></td><td style="width: 20px; height: 20px;"></td></tr></table> |  |  |  |  |  |  |
|       |                                          |                                                                                                                                                                                                                                                                                                                                            |                                                                                                                                                                                                                                                                                                                                            |  |  |  |  |  |                                                                                                                                                                                                                                                                                                                                            |  |  |  |  |  |  |
|       |                                          |                                                                                                                                                                                                                                                                                                                                            |                                                                                                                                                                                                                                                                                                                                            |  |  |  |  |  |                                                                                                                                                                                                                                                                                                                                            |  |  |  |  |  |  |
| 912   | Other upper respiratory tract infections | <table border="1" style="display: inline-table;"><tr><td style="width: 20px; height: 20px;"></td><td style="width: 20px; height: 20px;"></td></tr></table> |                                                                                                                                                                                                                                                                                                                                            |  |  |  |  |  | <table border="1" style="display: inline-table;"><tr><td style="width: 20px; height: 20px;"></td><td style="width: 20px; height: 20px;"></td></tr></table> |  |  |  |  |  |  |
|       |                                          |                                                                                                                                                                                                                                                                                                                                            |                                                                                                                                                                                                                                                                                                                                            |  |  |  |  |  |                                                                                                                                                                                                                                                                                                                                            |  |  |  |  |  |  |
|       |                                          |                                                                                                                                                                                                                                                                                                                                            |                                                                                                                                                                                                                                                                                                                                            |  |  |  |  |  |                                                                                                                                                                                                                                                                                                                                            |  |  |  |  |  |  |
| 913   | Diarrhea (<1 year)                       | <table border="1" style="display: inline-table;"><tr><td style="width: 20px; height: 20px;"></td><td style="width: 20px; height: 20px;"></td></tr></table> |                                                                                                                                                                                                                                                                                                                                            |  |  |  |  |  | <table border="1" style="display: inline-table;"><tr><td style="width: 20px; height: 20px;"></td><td style="width: 20px; height: 20px;"></td></tr></table> |  |  |  |  |  |  |
|       |                                          |                                                                                                                                                                                                                                                                                                                                            |                                                                                                                                                                                                                                                                                                                                            |  |  |  |  |  |                                                                                                                                                                                                                                                                                                                                            |  |  |  |  |  |  |
|       |                                          |                                                                                                                                                                                                                                                                                                                                            |                                                                                                                                                                                                                                                                                                                                            |  |  |  |  |  |                                                                                                                                                                                                                                                                                                                                            |  |  |  |  |  |  |
| 914   | Diarrhea (1-4 yrs)                       | <table border="1" style="display: inline-table;"><tr><td style="width: 20px; height: 20px;"></td><td style="width: 20px; height: 20px;"></td></tr></table> |                                                                                                                                                                                                                                                                                                                                            |  |  |  |  |  | <table border="1" style="display: inline-table;"><tr><td style="width: 20px; height: 20px;"></td><td style="width: 20px; height: 20px;"></td></tr></table> |  |  |  |  |  |  |
|       |                                          |                                                                                                                                                                                                                                                                                                                                            |                                                                                                                                                                                                                                                                                                                                            |  |  |  |  |  |                                                                                                                                                                                                                                                                                                                                            |  |  |  |  |  |  |
|       |                                          |                                                                                                                                                                                                                                                                                                                                            |                                                                                                                                                                                                                                                                                                                                            |  |  |  |  |  |                                                                                                                                                                                                                                                                                                                                            |  |  |  |  |  |  |
| 915   | Diarrhea ( 5 yrs+)                       | <table border="1" style="display: inline-table;"><tr><td style="width: 20px; height: 20px;"></td><td style="width: 20px; height: 20px;"></td></tr></table> |                                                                                                                                                                                                                                                                                                                                            |  |  |  |  |  | <table border="1" style="display: inline-table;"><tr><td style="width: 20px; height: 20px;"></td><td style="width: 20px; height: 20px;"></td></tr></table> |  |  |  |  |  |  |
|       |                                          |                                                                                                                                                                                                                                                                                                                                            |                                                                                                                                                                                                                                                                                                                                            |  |  |  |  |  |                                                                                                                                                                                                                                                                                                                                            |  |  |  |  |  |  |
|       |                                          |                                                                                                                                                                                                                                                                                                                                            |                                                                                                                                                                                                                                                                                                                                            |  |  |  |  |  |                                                                                                                                                                                                                                                                                                                                            |  |  |  |  |  |  |
| 916   | Malaria (<1 year)                        | <table border="1" style="display: inline-table;"><tr><td style="width: 20px; height: 20px;"></td><td style="width: 20px; height: 20px;"></td></tr></table> |                                                                                                                                                                                                                                                                                                                                            |  |  |  |  |  | <table border="1" style="display: inline-table;"><tr><td style="width: 20px; height: 20px;"></td><td style="width: 20px; height: 20px;"></td></tr></table> |  |  |  |  |  |  |
|       |                                          |                                                                                                                                                                                                                                                                                                                                            |                                                                                                                                                                                                                                                                                                                                            |  |  |  |  |  |                                                                                                                                                                                                                                                                                                                                            |  |  |  |  |  |  |
|       |                                          |                                                                                                                                                                                                                                                                                                                                            |                                                                                                                                                                                                                                                                                                                                            |  |  |  |  |  |                                                                                                                                                                                                                                                                                                                                            |  |  |  |  |  |  |
| 917   | Malaria (1-4 yrs)                        | <table border="1" style="display: inline-table;"><tr><td style="width: 20px; height: 20px;"></td><td style="width: 20px; height: 20px;"></td></tr></table> |                                                                                                                                                                                                                                                                                                                                            |  |  |  |  |  | <table border="1" style="display: inline-table;"><tr><td style="width: 20px; height: 20px;"></td><td style="width: 20px; height: 20px;"></td></tr></table> |  |  |  |  |  |  |
|       |                                          |                                                                                                                                                                                                                                                                                                                                            |                                                                                                                                                                                                                                                                                                                                            |  |  |  |  |  |                                                                                                                                                                                                                                                                                                                                            |  |  |  |  |  |  |
|       |                                          |                                                                                                                                                                                                                                                                                                                                            |                                                                                                                                                                                                                                                                                                                                            |  |  |  |  |  |                                                                                                                                                                                                                                                                                                                                            |  |  |  |  |  |  |
| 918   | Malaria ( 5 yrs+)                        | <table border="1" style="display: inline-table;"><tr><td style="width: 20px; height: 20px;"></td><td style="width: 20px; height: 20px;"></td></tr></table> |                                                                                                                                                                                                                                                                                                                                            |  |  |  |  |  | <table border="1" style="display: inline-table;"><tr><td style="width: 20px; height: 20px;"></td><td style="width: 20px; height: 20px;"></td></tr></table> |  |  |  |  |  |  |
|       |                                          |                                                                                                                                                                                                                                                                                                                                            |                                                                                                                                                                                                                                                                                                                                            |  |  |  |  |  |                                                                                                                                                                                                                                                                                                                                            |  |  |  |  |  |  |
|       |                                          |                                                                                                                                                                                                                                                                                                                                            |                                                                                                                                                                                                                                                                                                                                            |  |  |  |  |  |                                                                                                                                                                                                                                                                                                                                            |  |  |  |  |  |  |
| 919   | Malaria (Pregnant women)                 |                                                                                                                                                                                                                                                                                                                                            | <table border="1" style="display: inline-table;"><tr><td style="width: 20px; height: 20px;"></td><td style="width: 20px; height: 20px;"></td></tr></table> |  |  |  |  |  |                                                                                                                                                                                                                                                                                                                                            |  |  |  |  |  |  |
|       |                                          |                                                                                                                                                                                                                                                                                                                                            |                                                                                                                                                                                                                                                                                                                                            |  |  |  |  |  |                                                                                                                                                                                                                                                                                                                                            |  |  |  |  |  |  |
| 920   | Pyrexia (Fever) of unknown cause (PUO)   | <table border="1" style="display: inline-table;"><tr><td style="width: 20px; height: 20px;"></td><td style="width: 20px; height: 20px;"></td></tr></table> |                                                                                                                                                                                                                                                                                                                                            |  |  |  |  |  | <table border="1" style="display: inline-table;"><tr><td style="width: 20px; height: 20px;"></td><td style="width: 20px; height: 20px;"></td></tr></table> |  |  |  |  |  |  |
|       |                                          |                                                                                                                                                                                                                                                                                                                                            |                                                                                                                                                                                                                                                                                                                                            |  |  |  |  |  |                                                                                                                                                                                                                                                                                                                                            |  |  |  |  |  |  |
|       |                                          |                                                                                                                                                                                                                                                                                                                                            |                                                                                                                                                                                                                                                                                                                                            |  |  |  |  |  |                                                                                                                                                                                                                                                                                                                                            |  |  |  |  |  |  |
| 921   | Anaemia                                  | <table border="1" style="display: inline-table;"><tr><td style="width: 20px; height: 20px;"></td><td style="width: 20px; height: 20px;"></td></tr></table> |                                                                                                                                                                                                                                                                                                                                            |  |  |  |  |  | <table border="1" style="display: inline-table;"><tr><td style="width: 20px; height: 20px;"></td><td style="width: 20px; height: 20px;"></td></tr></table> |  |  |  |  |  |  |
|       |                                          |                                                                                                                                                                                                                                                                                                                                            |                                                                                                                                                                                                                                                                                                                                            |  |  |  |  |  |                                                                                                                                                                                                                                                                                                                                            |  |  |  |  |  |  |
|       |                                          |                                                                                                                                                                                                                                                                                                                                            |                                                                                                                                                                                                                                                                                                                                            |  |  |  |  |  |                                                                                                                                                                                                                                                                                                                                            |  |  |  |  |  |  |
| 922   | Malnutrition (<1 yr)                     | <table border="1" style="display: inline-table;"><tr><td style="width: 20px; height: 20px;"></td><td style="width: 20px; height: 20px;"></td></tr></table> |                                                                                                                                                                                                                                                                                                                                            |  |  |  |  |  | <table border="1" style="display: inline-table;"><tr><td style="width: 20px; height: 20px;"></td><td style="width: 20px; height: 20px;"></td></tr></table> |  |  |  |  |  |  |
|       |                                          |                                                                                                                                                                                                                                                                                                                                            |                                                                                                                                                                                                                                                                                                                                            |  |  |  |  |  |                                                                                                                                                                                                                                                                                                                                            |  |  |  |  |  |  |
|       |                                          |                                                                                                                                                                                                                                                                                                                                            |                                                                                                                                                                                                                                                                                                                                            |  |  |  |  |  |                                                                                                                                                                                                                                                                                                                                            |  |  |  |  |  |  |
| 923   | Malnutrition (1-4 yrs)                   | <table border="1" style="display: inline-table;"><tr><td style="width: 20px; height: 20px;"></td><td style="width: 20px; height: 20px;"></td></tr></table> |                                                                                                                                                                                                                                                                                                                                            |  |  |  |  |  | <table border="1" style="display: inline-table;"><tr><td style="width: 20px; height: 20px;"></td><td style="width: 20px; height: 20px;"></td></tr></table> |  |  |  |  |  |  |
|       |                                          |                                                                                                                                                                                                                                                                                                                                            |                                                                                                                                                                                                                                                                                                                                            |  |  |  |  |  |                                                                                                                                                                                                                                                                                                                                            |  |  |  |  |  |  |
|       |                                          |                                                                                                                                                                                                                                                                                                                                            |                                                                                                                                                                                                                                                                                                                                            |  |  |  |  |  |                                                                                                                                                                                                                                                                                                                                            |  |  |  |  |  |  |
| 924   | Accident /injuries                       | <table border="1" style="display: inline-table;"><tr><td style="width: 20px; height: 20px;"></td><td style="width: 20px; height: 20px;"></td></tr></table> |                                                                                                                                                                                                                                                                                                                                            |  |  |  |  |  | <table border="1" style="display: inline-table;"><tr><td style="width: 20px; height: 20px;"></td><td style="width: 20px; height: 20px;"></td></tr></table> |  |  |  |  |  |  |
|       |                                          |                                                                                                                                                                                                                                                                                                                                            |                                                                                                                                                                                                                                                                                                                                            |  |  |  |  |  |                                                                                                                                                                                                                                                                                                                                            |  |  |  |  |  |  |
|       |                                          |                                                                                                                                                                                                                                                                                                                                            |                                                                                                                                                                                                                                                                                                                                            |  |  |  |  |  |                                                                                                                                                                                                                                                                                                                                            |  |  |  |  |  |  |
| 925   | Genital ulcers                           | <table border="1" style="display: inline-table;"><tr><td style="width: 20px; height: 20px;"></td><td style="width: 20px; height: 20px;"></td></tr></table> |                                                                                                                                                                                                                                                                                                                                            |  |  |  |  |  | <table border="1" style="display: inline-table;"><tr><td style="width: 20px; height: 20px;"></td><td style="width: 20px; height: 20px;"></td></tr></table> |  |  |  |  |  |  |
|       |                                          |                                                                                                                                                                                                                                                                                                                                            |                                                                                                                                                                                                                                                                                                                                            |  |  |  |  |  |                                                                                                                                                                                                                                                                                                                                            |  |  |  |  |  |  |
|       |                                          |                                                                                                                                                                                                                                                                                                                                            |                                                                                                                                                                                                                                                                                                                                            |  |  |  |  |  |                                                                                                                                                                                                                                                                                                                                            |  |  |  |  |  |  |
| 926   | Urethral discharge                       | <table border="1" style="display: inline-table;"><tr><td style="width: 20px; height: 20px;"></td><td style="width: 20px; height: 20px;"></td></tr></table> |                                                                                                                                                                                                                                                                                                                                            |  |  |  |  |  |                                                                                                                                                                                                                                                                                                                                            |  |  |  |  |  |  |
|       |                                          |                                                                                                                                                                                                                                                                                                                                            |                                                                                                                                                                                                                                                                                                                                            |  |  |  |  |  |                                                                                                                                                                                                                                                                                                                                            |  |  |  |  |  |  |
| 927   | Vaginal discharge                        |                                                                                                                                                                                                                                                                                                                                            | <table border="1" style="display: inline-table;"><tr><td style="width: 20px; height: 20px;"></td><td style="width: 20px; height: 20px;"></td></tr></table> |  |  |  |  |  |                                                                                                                                                                                                                                                                                                                                            |  |  |  |  |  |  |
|       |                                          |                                                                                                                                                                                                                                                                                                                                            |                                                                                                                                                                                                                                                                                                                                            |  |  |  |  |  |                                                                                                                                                                                                                                                                                                                                            |  |  |  |  |  |  |
| 928   | Pelvic Inflammatory Disease              |                                                                                                                                                                                                                                                                                                                                            | <table border="1" style="display: inline-table;"><tr><td style="width: 20px; height: 20px;"></td><td style="width: 20px; height: 20px;"></td></tr></table> |  |  |  |  |  |                                                                                                                                                                                                                                                                                                                                            |  |  |  |  |  |  |
|       |                                          |                                                                                                                                                                                                                                                                                                                                            |                                                                                                                                                                                                                                                                                                                                            |  |  |  |  |  |                                                                                                                                                                                                                                                                                                                                            |  |  |  |  |  |  |
| 929   | Genital warts                            | <table border="1" style="display: inline-table;"><tr><td style="width: 20px; height: 20px;"></td><td style="width: 20px; height: 20px;"></td></tr></table> |                                                                                                                                                                                                                                                                                                                                            |  |  |  |  |  | <table border="1" style="display: inline-table;"><tr><td style="width: 20px; height: 20px;"></td><td style="width: 20px; height: 20px;"></td></tr></table> |  |  |  |  |  |  |
|       |                                          |                                                                                                                                                                                                                                                                                                                                            |                                                                                                                                                                                                                                                                                                                                            |  |  |  |  |  |                                                                                                                                                                                                                                                                                                                                            |  |  |  |  |  |  |
|       |                                          |                                                                                                                                                                                                                                                                                                                                            |                                                                                                                                                                                                                                                                                                                                            |  |  |  |  |  |                                                                                                                                                                                                                                                                                                                                            |  |  |  |  |  |  |
| 930   | Latent syphilis (blood test)             | <table border="1" style="display: inline-table;"><tr><td style="width: 20px; height: 20px;"></td><td style="width: 20px; height: 20px;"></td></tr></table> |                                                                                                                                                                                                                                                                                                                                            |  |  |  |  |  | <table border="1" style="display: inline-table;"><tr><td style="width: 20px; height: 20px;"></td><td style="width: 20px; height: 20px;"></td></tr></table> |  |  |  |  |  |  |
|       |                                          |                                                                                                                                                                                                                                                                                                                                            |                                                                                                                                                                                                                                                                                                                                            |  |  |  |  |  |                                                                                                                                                                                                                                                                                                                                            |  |  |  |  |  |  |
|       |                                          |                                                                                                                                                                                                                                                                                                                                            |                                                                                                                                                                                                                                                                                                                                            |  |  |  |  |  |                                                                                                                                                                                                                                                                                                                                            |  |  |  |  |  |  |
| 931   | Other STI                                | <table border="1" style="display: inline-table;"><tr><td style="width: 20px; height: 20px;"></td><td style="width: 20px; height: 20px;"></td></tr></table> |                                                                                                                                                                                                                                                                                                                                            |  |  |  |  |  | <table border="1" style="display: inline-table;"><tr><td style="width: 20px; height: 20px;"></td><td style="width: 20px; height: 20px;"></td></tr></table> |  |  |  |  |  |  |
|       |                                          |                                                                                                                                                                                                                                                                                                                                            |                                                                                                                                                                                                                                                                                                                                            |  |  |  |  |  |                                                                                                                                                                                                                                                                                                                                            |  |  |  |  |  |  |
|       |                                          |                                                                                                                                                                                                                                                                                                                                            |                                                                                                                                                                                                                                                                                                                                            |  |  |  |  |  |                                                                                                                                                                                                                                                                                                                                            |  |  |  |  |  |  |

| SL No | Diseases or medical conditions                                  | Male (Number of cases) | Female (Number of cases) |
|-------|-----------------------------------------------------------------|------------------------|--------------------------|
|       |                                                                 | A                      | B                        |
| 932   | Pulmonary TB suspect                                            |                        |                          |
| 933   | Pulmonary TB confirmed by sputum test                           |                        |                          |
| 934   | Leprosy                                                         |                        |                          |
| 935   | Yaws                                                            |                        |                          |
| 936   | Other skin diseases                                             |                        |                          |
| 937   | Ear infections (including both middle and outer ear infections) |                        |                          |
| 938   | Eye infections                                                  |                        |                          |
| 939   | All other new cases                                             |                        |                          |

Table 9.2: Inpatients (Number of discharges from monthly report)

| SL No | Diseases or medical conditions                | Male (discharges) | Female (discharges) |
|-------|-----------------------------------------------|-------------------|---------------------|
|       |                                               | A                 | B                   |
| 940   | Diphtheria                                    |                   |                     |
| 941   | Neonatal Tetanus                              |                   |                     |
| 942   | Acute Flaccid Paralysis                       |                   |                     |
| 943   | Measles (suspected)                           |                   |                     |
| 944   | Pertussis                                     |                   |                     |
| 945   | Neonatal sepsis                               |                   |                     |
| 946   | Pneumonia (<1 year)                           |                   |                     |
| 947   | Pneumonia ( 1-4 yrs)                          |                   |                     |
| 948   | Pneumonia ( 5 yrs+)                           |                   |                     |
| 949   | Chronic Obstructive Pulmonary Diseases        |                   |                     |
| 950   | Asthma                                        |                   |                     |
| 951   | Other respiratory                             |                   |                     |
| 952   | Diarrhea (<1 year)                            |                   |                     |
| 953   | Diarrhea ( 1-4 yrs)                           |                   |                     |
| 954   | Diarrhea ( 5 yrs+)                            |                   |                     |
| 955   | Malaria (Clinical diagnosis) (0-4 years)      |                   |                     |
| 956   | Malaria (Clinical diagnosis) (5-14 years)     |                   |                     |
| 957   | Malaria (Clinical diagnosis) (15 yrs+)        |                   |                     |
| 958   | Malaria (Clinical diagnosis) (Pregnant)       | ██████████        |                     |
| 959   | Malaria (Slide or RDT diagnosis) (0-4 years)  |                   |                     |
| 960   | Malaria (Slide or RDT diagnosis) (5-14 years) |                   |                     |
| 961   | Malaria (Slide or RDT diagnosis) (15 yrs +)   |                   |                     |
| 962   | Malaria (Slide or RDT diagnosis) (Pregnant)   | ██████████        |                     |
| 963   | Anemia                                        |                   |                     |
| 964   | Malnutrition (<1 yr)                          |                   |                     |
| 965   | Malnutrition (1-4 yrs)                        |                   |                     |
| 966   | All accidents/injuries                        |                   |                     |

| SL No | Diseases or medical conditions      | Male (discharges) | Female (discharges) |
|-------|-------------------------------------|-------------------|---------------------|
|       |                                     | A                 | B                   |
| 967   | Typhoid                             |                   |                     |
| 968   | TB                                  |                   |                     |
| 969   | Leprosy                             |                   |                     |
| 970   | Meningitis (<1 year)                |                   |                     |
| 971   | Meningitis (1-4 years)              |                   |                     |
| 972   | Meningitis (5 years+)               |                   |                     |
| 973   | Snakebite                           |                   |                     |
| 974   | Skin diseases                       |                   |                     |
| 975   | HIV/AIDS (<5 years)                 |                   |                     |
| 976   | HIV/AIDS (5-14 years)               |                   |                     |
| 977   | HIV/AIDS (15-24 years)              |                   |                     |
| 978   | HIV/AIDS (25 years+)                |                   |                     |
| 979   | TB-HIV Patients                     |                   |                     |
| 980   | Ischemic heart diseases             |                   |                     |
| 981   | Cancer                              |                   |                     |
| 982   | Hypertension                        |                   |                     |
| 983   | Diabetes                            |                   |                     |
| 984   | Other discharges not included above |                   |                     |

Table 9.3: Family Planning Services Provided

| SL No | FP Methods and services          | New attendance in facility | Re-attendance in facility | New attendance in Aidpost | Re-attendance in Aidpost |
|-------|----------------------------------|----------------------------|---------------------------|---------------------------|--------------------------|
|       |                                  | A                          | B                         | C                         | D                        |
| 985   | Breast feeding                   |                            |                           |                           |                          |
| 986   | Com. Pill (OCP)                  |                            |                           |                           |                          |
| 987   | Injection                        |                            |                           |                           |                          |
| 988   | Ovulation                        |                            |                           |                           |                          |
| 989   | Condom                           |                            |                           |                           |                          |
| 990   | Loops/IUD                        |                            |                           |                           |                          |
| 991   | T/ligation                       |                            |                           |                           |                          |
| 992   | Vasectomy                        |                            |                           |                           |                          |
| 993   | Referred out to other facilities |                            |                           |                           |                          |

Table 9.4: Maternal, Neonatal and Child Health Services

| SL No | Antenatal care | Number |
|-------|----------------|--------|
| 994   | First visit    |        |
| 995   | Fourth visit   |        |
| 996   | Other          |        |
| 997   | First dose TT  |        |
| 998   | Second dose TT |        |
| 999   | Booster        |        |

|      | Deliveries                                                       | Number        |
|------|------------------------------------------------------------------|---------------|
| 1000 | Uncomplicated deliveries in health facility                      | _ _ _ _ _ _ _ |
| 1001 | Deliveries with complications in health facility                 | _ _ _ _ _ _ _ |
| 1002 | Transferred to hospital for pregnancy and delivery complications | _ _ _ _ _ _ _ |
| 1003 | Birth weight <2500 grams                                         | _ _ _ _ _ _ _ |
| 1004 | Still births                                                     | _ _ _ _ _ _ _ |
| 1005 | Born before arrival                                              | _ _ _ _ _ _ _ |
| 1006 | Village births attended (total)                                  | _ _ _ _ _ _ _ |

Table 9.5 Well Baby Clinic

| SL Number | Type of service                | New attend    | Re-attend     |
|-----------|--------------------------------|---------------|---------------|
|           |                                | A             | B             |
| 1007      | Clinic Attendances (<1 year)   | _ _ _ _ _ _ _ | _ _ _ _ _ _ _ |
| 1008      | Clinic Attendances (1-4 years) | _ _ _ _ _ _ _ | _ _ _ _ _ _ _ |

Table 9.6: Immunizations administered

| Serial No | Vaccine type administered                      | Administered in clinic or in outreach | Administered by Aidposts |
|-----------|------------------------------------------------|---------------------------------------|--------------------------|
|           |                                                | A                                     | B                        |
| 1009      | BCG (Within 24 hours of birth)                 | _ _ _ _ _ _ _                         | _ _ _ _ _ _ _            |
| 1010      | BCG (<1 week but not within 24 hours of birth) | _ _ _ _ _ _ _                         | _ _ _ _ _ _ _            |
| 1011      | BCG (> 1 week)                                 | _ _ _ _ _ _ _                         | _ _ _ _ _ _ _            |
| 1012      | Hepatitis B (Within 24 hours of birth)         | _ _ _ _ _ _ _                         | _ _ _ _ _ _ _            |
| 1013      | Hepatitis B (> 24 hours)                       | _ _ _ _ _ _ _                         | _ _ _ _ _ _ _            |
| 1014      | DTP/Hib (Hep B) (First dose < 1 year)          | _ _ _ _ _ _ _                         | _ _ _ _ _ _ _            |
| 1015      | DTP/Hib (Hep B) (Second dose < 1 year)         | _ _ _ _ _ _ _                         | _ _ _ _ _ _ _            |
| 1016      | DTP/Hib (Hep B) (Third dose < 1 year)          | _ _ _ _ _ _ _                         | _ _ _ _ _ _ _            |
| 1017      | DTP/Hib (Hep B) (> 1 year)                     | _ _ _ _ _ _ _                         | _ _ _ _ _ _ _            |
| 1018      | Sabin Polio Vaccine (First dose < 1 year)      | _ _ _ _ _ _ _                         | _ _ _ _ _ _ _            |
| 1019      | Sabin Polio Vaccine (Second dose < 1 year)     | _ _ _ _ _ _ _                         | _ _ _ _ _ _ _            |
| 1020      | Sabin Polio Vaccine (Third dose < 1 year)      | _ _ _ _ _ _ _                         | _ _ _ _ _ _ _            |
| 1021      | Sabin Polio Vaccine (> 1 year)                 | _ _ _ _ _ _ _                         | _ _ _ _ _ _ _            |
| 1022      | Measles (6-8 months)                           | _ _ _ _ _ _ _                         | _ _ _ _ _ _ _            |
| 1023      | Measles (9-11 months)                          | _ _ _ _ _ _ _                         | _ _ _ _ _ _ _            |
| 1024      | Measles (>1 year)                              | _ _ _ _ _ _ _                         | _ _ _ _ _ _ _            |
| 1025      | Vitamin A (6 months)                           | _ _ _ _ _ _ _                         | _ _ _ _ _ _ _            |
| 1026      | Vitamin A (12 months)                          | _ _ _ _ _ _ _                         | _ _ _ _ _ _ _            |
| 1027      | Vitamin A (>1 year)                            | _ _ _ _ _ _ _                         | _ _ _ _ _ _ _            |

Survey completed at: Hour |\_|\_|\_| Minutes |\_|\_|\_|

Phone number for future contact |\_|\_|\_|\_|\_|\_|\_|\_| |\_|\_|\_|\_|\_|\_|\_|\_|

**STROBE Statement—Checklist of items that should be included in reports of *cross-sectional studies***

|                              | <b>Item No</b> | <b>Recommendation</b>                                                                                                                                                                             | <b>Page #</b> |
|------------------------------|----------------|---------------------------------------------------------------------------------------------------------------------------------------------------------------------------------------------------|---------------|
| <b>Title and abstract</b>    | 1              | (a) Indicate the study's design with a commonly used term in the title or the abstract: DONE                                                                                                      | 1, 2          |
|                              |                | (b) Provide in the abstract an informative and balanced summary of what was done and what was found                                                                                               | 4             |
| <b>Introduction</b>          |                |                                                                                                                                                                                                   |               |
| Background/<br>rationale     | 2              | Explain the scientific background and rationale for the investigation being reported: SEE INTRODUCTION SECTION                                                                                    | 6 and 7       |
| Objectives                   | 3              | State specific objectives, including any prespecified hypotheses:                                                                                                                                 | 7             |
| <b>Methods</b>               |                |                                                                                                                                                                                                   |               |
| Study design                 | 4              | Present key elements of study design early in the paper:                                                                                                                                          | 7-11          |
| Setting                      | 5              | Describe the setting, locations, and relevant dates, including periods of recruitment, exposure, follow-up, and data collection                                                                   | 8-9           |
| Participants                 | 6              | (a) Give the eligibility criteria, and the sources and methods of selection of participants                                                                                                       | 8,9           |
| Variables                    | 7              | Clearly define all outcomes, exposures, predictors, potential confounders, and effect modifiers. Give diagnostic criteria, if applicable. SEE THE SECTION ON "OUTCOME MEASURES"                   | 10-11         |
| Data sources/<br>measurement | 8*             | For each variable of interest, give sources of data and details of methods of assessment (measurement). Describe comparability of assessment methods if there is more than one group              | 10-11         |
| Bias                         | 9              | Describe any efforts to address potential sources of bias                                                                                                                                         | 10            |
| Study size                   | 10             | Explain how the study size was arrived at: SEE SURVEY DESIGN                                                                                                                                      | 8-9           |
| Quantitative variables       | 11             | Explain how quantitative variables were handled in the analyses. If applicable, describe which groupings were chosen and why                                                                      | 10-11         |
| Statistical methods          | 12             | (a) Describe all statistical methods, including those used to control for confounding                                                                                                             | 10-11         |
|                              |                | (b) Describe any methods used to examine subgroups and interactions.                                                                                                                              | 10-11         |
|                              |                | (c) Explain how missing data were addressed. NOT APPLICABLE                                                                                                                                       | NA            |
|                              |                | (d) If applicable, describe analytical methods taking account of sampling strategy. NOT APPLICABLE                                                                                                |               |
|                              |                | (e) Describe any sensitivity analyses. NOT APPLICABLE                                                                                                                                             |               |
| <b>Results</b>               |                |                                                                                                                                                                                                   |               |
| Participants                 | 13*            | (a) Report numbers of individuals at each stage of study—eg numbers potentially eligible, examined for eligibility, confirmed eligible, included in the study, completing follow-up, and analysed | 8-9           |
|                              |                | (b) Give reasons for non-participation at each stage: NO PARTICIPATION ISSUE. THE FACILITIES VISITED WERE SURVEYED.                                                                               | NA            |
|                              |                | (c) Consider use of a flow diagram: NOT APPLICABLE FOR THE STUDY                                                                                                                                  | NA            |

|                          |     |                                                                                                                                                                                                                                                                       |       |
|--------------------------|-----|-----------------------------------------------------------------------------------------------------------------------------------------------------------------------------------------------------------------------------------------------------------------------|-------|
| Descriptive data         | 14* | (a) Give characteristics of study participants (eg demographic, clinical, social) and information on exposures and potential confounders                                                                                                                              | NA    |
|                          |     | (b) Indicate number of participants with missing data for each variable of interest: FACILITY LEVEL DATA HAD NO MISSING VALUES.                                                                                                                                       | NA    |
| Outcome data             | 15* | Report numbers of outcome events or summary measures: SEE THE TABLES TO PRESENT THE RESULTS                                                                                                                                                                           | 21-24 |
| Main results             | 16  | (a) Give unadjusted estimates and, if applicable, confounder-adjusted estimates and their precision (eg, 95% confidence interval). Make clear which confounders were adjusted for and why they were included: SEE TABLES. AVERAGES ARE USED FOR COMPARATIVE PURPOSES. | 21-24 |
|                          |     | (b) Report category boundaries when continuous variables were categorized. NOT RELEVANT                                                                                                                                                                               | NA    |
|                          |     | (c) If relevant, consider translating estimates of relative risk into absolute risk for a meaningful time period. NOT RELEVANT                                                                                                                                        | NA    |
| Other analyses           | 17  | Report other analyses done—eg analyses of subgroups and interactions, and sensitivity analyses. NOT RELEVANT                                                                                                                                                          | NA    |
| <b>Discussion</b>        |     |                                                                                                                                                                                                                                                                       |       |
| Key results              | 18  | Summarise key results with reference to study objectives. LAST PARAGRAPH OF PAGE 13 AND FIRST 2 PARAGRAPHS OF PAGE 14                                                                                                                                                 | 13-14 |
| Limitations              | 19  | Discuss limitations of the study, taking into account sources of potential bias or imprecision. Discuss both direction and magnitude of any potential bias SEE STUDY LIMITATIONS SECTION, PAGE 15.                                                                    | 15    |
| Interpretation           | 20  | Give a cautious overall interpretation of results considering objectives, limitations, multiplicity of analyses, results from similar studies, and other relevant evidence CONCLUSIONS SECTION, PAGE 16                                                               | 16    |
| Generalisability         | 21  | Discuss the generalisability (external validity) of the study results FIRST PART OF DISCUSSION SECTION.                                                                                                                                                               | 13    |
| <b>Other information</b> |     |                                                                                                                                                                                                                                                                       |       |
| Funding                  | 22  | Give the source of funding and the role of the funders for the present study and, if applicable, for the original study on which the present article is based                                                                                                         | 3     |
