# Supplementary material for: Readiness of health facilities to provide emergency obstetric care in Papua New Guinea: evidence from a cross-sectional survey
Source: PubMed Central journal article supplement — BMJ Open. 2022 Feb 16;12(2):e050150. doi: 10.1136/bmjopen-2021-050150 (PMC8860041; doi:10.1136/bmjopen-2021-050150), 2022-02-16
Supplement: bmjopen-2021-050150supp001.pdf [file bmjopen-2021-050150supp001.pdf]

# **Health Facility Efficiency Study in PNG with a Focus on Secondary Care**

## **Health Facility Assessment 2014**

**Papua New Guinea Institute of Medical Research,  
PO Box 60 Goroka, Papua New Guinea;  
University of South Carolina, Columbia, South Carolina, USA;  
and Nossal Institute for Global Health, Melbourne, Australia.**



Start time: Hour |\_\_|\_\_| Minute |\_\_|\_\_|

## Section 1. General information

| No  | Questions and Filters                                                                                                          | Coding categories                                                                                                                                                                                                                                                                                         | Response                 | Skip         |
|-----|--------------------------------------------------------------------------------------------------------------------------------|-----------------------------------------------------------------------------------------------------------------------------------------------------------------------------------------------------------------------------------------------------------------------------------------------------------|--------------------------|--------------|
| 101 | Name and position of the person interviewed for the survey (transfer information from cover page)                              | Interviewee name _____<br>Position _____                                                                                                                                                                                                                                                                  | <input type="text"/>     |              |
| 102 | Type of health facility (transfer information from cover page)                                                                 | HC.....03<br>DLH.....04<br>PH.....05<br>RH.....06<br>NH.....07<br>Other.....96                                                                                                                                                                                                                            | <input type="text"/>     |              |
| 103 | Ownership of the facility (transfer information from cover page)                                                               | Pubic.....1<br>Church Catholic.....2<br>Church Lutheran.....3<br>Church SDA.....4                                                                                                                                                                                                                         | <input type="checkbox"/> |              |
| 104 | Is there a signboard/sign with the facility name?                                                                              | Yes.....1<br>No.....2                                                                                                                                                                                                                                                                                     | <input type="checkbox"/> |              |
| 105 | Is this facility open 24 hours a day, seven days a week?                                                                       | Yes.....1<br>No.....2                                                                                                                                                                                                                                                                                     | <input type="checkbox"/> |              |
| 106 | The services available 24/7 from this facility<br><br>FOR EACH SERVICE, IF AVAILABLE 24 HOURS RECORD "1", OTHERWISE RECORD "2" | A. Inpatient hospital services<br>B. Emergency room services<br>C. Outpatient clinics for adults<br>D. Outpatient clinics for children<br>E. Outpatient clinics for women<br>F. Lab and Diagnostic Services<br>G. Pharmacy Services<br>H. Snake-bite clinic services<br>I. Other Services (specify) _____ | <input type="text"/>     |              |
| 107 | How many days in a week the outpatient facility is open on weekdays?                                                           | Days                                                                                                                                                                                                                                                                                                      | <input type="checkbox"/> |              |
| 108 | Opening time on Weekdays (Mon-Fri)                                                                                             | Hour : Min                                                                                                                                                                                                                                                                                                | _ _ : _ _                |              |
| 109 | Closing time on Weekdays (Mon-Fri)                                                                                             | Hour : Min                                                                                                                                                                                                                                                                                                | _ _ : _ _                |              |
| 110 | Does this facility provide outpatient services on Saturdays and Sundays?                                                       | Only Saturdays.....1<br>Only Sundays.....2<br>Both Saturdays and Sundays.....3<br>Not open on weekends.....4                                                                                                                                                                                              | <input type="checkbox"/> | If 4<br>➔113 |
| 111 | Opening time on Weekends                                                                                                       | Hour : Min                                                                                                                                                                                                                                                                                                | _ _ : _ _                |              |
| 112 | Closing time on Weekends                                                                                                       | Hour : Min                                                                                                                                                                                                                                                                                                | _ _ : _ _                |              |
| 113 | Is the facility is connected to electric supply grid?                                                                          | Yes.....1<br>No.....2                                                                                                                                                                                                                                                                                     | <input type="checkbox"/> | If 2<br>➔117 |
| 114 | Is the electricity available 24 hours a day from the grid in a normal week?                                                    | Yes.....1<br>No.....2                                                                                                                                                                                                                                                                                     | <input type="checkbox"/> |              |
| 115 | Was electricity available through the grid all the time during the past one week?                                              | Yes.....1<br>No.....2                                                                                                                                                                                                                                                                                     | <input type="checkbox"/> |              |
| 116 | In last one week, how many hours the electricity was not available through the grid?                                           | Hours                                                                                                                                                                                                                                                                                                     | _ _ _                    |              |
| 117 | Does the facility have a functional back up or standby generator or electricity?                                               | Yes.....1<br>No.....2                                                                                                                                                                                                                                                                                     | <input type="checkbox"/> |              |

| No  | Questions and Filters                                                                                             | Coding categories                                                                                                                                    | Response                                                                                         | Skip         |
|-----|-------------------------------------------------------------------------------------------------------------------|------------------------------------------------------------------------------------------------------------------------------------------------------|--------------------------------------------------------------------------------------------------|--------------|
| 118 | Does the facility face problems with operating the backup system/generator due to lack of fuel in last one month? | Yes.....1<br>No .....2                                                                                                                               | <input type="checkbox"/>                                                                         |              |
| 119 | What is the health facility's <u>main</u> source of water now?                                                    | Piped.....1<br>Water tank (Water stored from supply).....2<br>Tube well.....3<br>Bore hole .....4<br>Protected well .....5<br>Others (Specify).....8 | <input type="checkbox"/>                                                                         |              |
| 120 | If water comes from supply line, how many hours the water is normally available in a day?                         | Hours                                                                                                                                                | _ _ _                                                                                            |              |
| 121 | In 2014, has water been available from this source all year?                                                      | Yes .....1<br>No .....2                                                                                                                              | <input type="checkbox"/>                                                                         |              |
| 122 | Are health workers able to use this water source today when treating patients?                                    | Yes .....1<br>No .....2                                                                                                                              | <input type="checkbox"/>                                                                         |              |
| 123 | Is the water supply connected to the delivery room and working today?                                             | Yes .....1<br>No .....2                                                                                                                              | <input type="checkbox"/>                                                                         |              |
| 124 | If there is a problem with the water supply (fixtures and lines), who is responsible for fixing it?               | Province.....1<br>District.....2<br>Church agency.....3<br>This facility.....4<br>Referral health facility .....5                                    | <input type="checkbox"/>                                                                         |              |
| 125 | How are expenses for fixing problems with the water supply met?                                                   | Request province.....1<br>Request district.....2<br>Own budget.....3<br>Referral health facility .....4                                              | <input type="checkbox"/>                                                                         |              |
| 126 | Do you think that the facility has adequate number of toilets?                                                    | Adequate.....1<br>Need few additional.....2<br>Not adequate at all.....3                                                                             | <input type="checkbox"/>                                                                         |              |
| 127 | Is there a private pharmacy within walking distance from this facility?                                           | Yes.....1<br>No .....2                                                                                                                               | <input type="checkbox"/>                                                                         |              |
| 128 | How many buildings are used to provide services in the facility?                                                  | Number of buildings                                                                                                                                  | _ _                                                                                              |              |
| 129 | Total land area of the facility                                                                                   | Land area in decimals                                                                                                                                | _ _ _ _                                                                                          |              |
| 130 | Construction materials used in the construction of the main building of the facility                              | Cement/brick.....1<br>Tin/other metals/tile.....2<br>Wood.....3<br>Leaves/other low-cost materials.....4<br>Others .....8                            | Roof <input type="checkbox"/><br>Wall <input type="checkbox"/><br>Floor <input type="checkbox"/> |              |
| 131 | Condition of the infrastructure                                                                                   | Most buildings/ building need major repairs.....1<br>In general, minor repairs needed.....2<br>Does not require much repairs.....3                   | <input type="checkbox"/>                                                                         |              |
| 132 | Is the land area around the health facility clean?                                                                | Yes.....1<br>No .....2                                                                                                                               | <input type="checkbox"/>                                                                         |              |
| 133 | Is the main building raised?                                                                                      | Yes.....1<br>No .....2                                                                                                                               | <input type="checkbox"/>                                                                         | If 2<br>➔135 |
| 134 | How many meters the building is raised?                                                                           | Meters (MM.M)                                                                                                                                        | _ _ _ _                                                                                          |              |
| 135 | Are there living quarters on campus?                                                                              | Yes.....1<br>No .....2                                                                                                                               | <input type="checkbox"/>                                                                         | If 2<br>➔137 |

| No  | Questions and Filters                                                                                                                         | Coding categories                                                                                                                                                                                                                                              | Response                                                                                                                                  | Skip         |
|-----|-----------------------------------------------------------------------------------------------------------------------------------------------|----------------------------------------------------------------------------------------------------------------------------------------------------------------------------------------------------------------------------------------------------------------|-------------------------------------------------------------------------------------------------------------------------------------------|--------------|
| 136 | How many families can live on campus (No. of separate quarters)                                                                               | If more than 98 families, enter 98.<br>Not known= 99                                                                                                                                                                                                           | <input type="text"/>                                                                                                                      |              |
| 137 | Does the facility have a blood bank?                                                                                                          | Yes.....1<br>No .....2                                                                                                                                                                                                                                         | <input type="checkbox"/>                                                                                                                  |              |
| 138 | Does the health unit have blood transfusion facility?                                                                                         | Yes.....1<br>No .....2                                                                                                                                                                                                                                         | <input type="checkbox"/>                                                                                                                  | If 2<br>→140 |
| 139 | Were there any blood transfusions done in the last one month?                                                                                 | Yes.....1<br>No .....2<br>Not applicable.....3                                                                                                                                                                                                                 | <input type="checkbox"/>                                                                                                                  |              |
| 140 | Does this facility have designated spaces for each of the doctors/key service providers to provide services after initial triage/examination? | Yes.....1<br>No .....2<br>Not applicable.....3                                                                                                                                                                                                                 | <input type="checkbox"/>                                                                                                                  |              |
| 141 | Is there an on-call room/space where health care professionals can rest during their on-call?                                                 | Yes.....1<br>No .....2<br>Not applicable.....3                                                                                                                                                                                                                 | <input type="checkbox"/>                                                                                                                  |              |
| 142 | Does this facility have working telephone or shortwave radio to call outside?                                                                 | Yes.....1<br>No .....2                                                                                                                                                                                                                                         | <input type="checkbox"/>                                                                                                                  |              |
| 143 | Does this facility have ambulances?                                                                                                           | Yes.....1<br>No .....2                                                                                                                                                                                                                                         | <input type="checkbox"/>                                                                                                                  | If 2<br>→147 |
| 144 | How many ambulances does the facility have?                                                                                                   | Number                                                                                                                                                                                                                                                         | <input type="text"/>                                                                                                                      |              |
| 145 | Was there any time this year when the ambulance was not in service?                                                                           | Yes.....1<br>No .....2                                                                                                                                                                                                                                         | <input type="checkbox"/>                                                                                                                  |              |
| 146 | If yes, how many ambulances remained out of service and for how long on average over the last one year?                                       | A. How many were out of service even temporarily?<br>B. Average weeks of out-of-service                                                                                                                                                                        | <input type="text"/><br><input type="text"/>                                                                                              |              |
| 147 | Does the facility have any other vehicles like cars, motorcycles etc.?                                                                        | Yes.....1<br>No .....2                                                                                                                                                                                                                                         | <input type="checkbox"/>                                                                                                                  | If 2<br>→201 |
| 148 | How many vehicles does the facility have?                                                                                                     | Car<br><br>Motorcycles                                                                                                                                                                                                                                         | <input type="text"/><br><input type="text"/>                                                                                              |              |
| 149 | Principal use of vehicles and ambulances in past seven days                                                                                   | Transporting patients to facility.....1<br>Transporting patients from village/local area to facility.....2<br>For use by health facility administrators.....3<br>For conducting outreach service.....4<br>Transporting healthcare providers to the facility..5 | Ambulance<br><input type="text"/><br>Cars<br><input type="text"/><br>Motorcycles<br><input type="text"/><br>Boats<br><input type="text"/> |              |
| 150 | Who meets the costs for maintenance / servicing of the vehicles?                                                                              | Province.....1<br>District.....2<br>Own budget.....3<br>Referral health facility .....4                                                                                                                                                                        | <input type="checkbox"/>                                                                                                                  |              |

## Section 2.1: Information on each of the buildings

| No  | Questions/ Items                                                            | Responses and codes                                                                                                                                                                                             | Building/<br>Structure #1 | Building/<br>Structure #2 |
|-----|-----------------------------------------------------------------------------|-----------------------------------------------------------------------------------------------------------------------------------------------------------------------------------------------------------------|---------------------------|---------------------------|
| 201 | Name of the structure/ building                                             |                                                                                                                                                                                                                 |                           |                           |
| 202 | Principal activities normally performed in the building/ structure          | Inpatient services.....1<br>Outpatient services.....2<br>Both inpatient and outpatient.....3<br>Lab/ diagnostic services.....4<br>Administrative offices.....5<br>Not used now.....6<br>Others.....8<br>Specify | <input type="checkbox"/>  | <input type="checkbox"/>  |
| 203 | Total floor space of the building                                           | Floor space in sq meters                                                                                                                                                                                        | _ _ _ _ _ _ _             | _ _ _ _ _ _ _             |
| 204 | Number of rooms in the structure (not including toilets, closets, hallways) | Number<br>Don't know: 998                                                                                                                                                                                       | _ _ _ _ _ _ _             | _ _ _ _ _ _ _             |
| 205 | Do windows and doors of the building need repairs?                          | No repairs needed .....1<br>Few repairs needed.....2<br>Many repairs needed.....3                                                                                                                               | <input type="checkbox"/>  | <input type="checkbox"/>  |
| 206 | Do interior walls and roof of the building need repairs?                    | No repairs needed .....1<br>Few repairs needed.....2<br>Many repairs needed.....3                                                                                                                               | <input type="checkbox"/>  | <input type="checkbox"/>  |
| 207 | Does electric supply system of the facility need repairs?                   | No repairs needed .....1<br>Few repairs needed.....2<br>Many repairs needed.....3                                                                                                                               | <input type="checkbox"/>  | <input type="checkbox"/>  |
| 208 | Does water supply system of the facility need repair works?                 | No repairs needed .....1<br>Few repairs needed.....2<br>Many repairs needed.....3                                                                                                                               | <input type="checkbox"/>  | <input type="checkbox"/>  |
| 209 | Does toilet (latrine) for clients' use of the facility need repair works?   | No repairs needed .....1<br>Few repairs needed.....2<br>Many repairs needed.....3<br>Not present.....4                                                                                                          | <input type="checkbox"/>  | <input type="checkbox"/>  |
| 210 | Number of toilets                                                           | Number<br>Don't know: 98                                                                                                                                                                                        | _ _ _ _ _ _ _             | _ _ _ _ _ _ _             |
| 211 | Are most of the toilets functional?                                         | Yes.....1<br>No .....2                                                                                                                                                                                          | <input type="checkbox"/>  | <input type="checkbox"/>  |
| 212 | Are the toilets clean?                                                      | Yes, all the toilets are clean.....1<br>Yes, most of the toilets are clean.....2<br>No, most are not clean.....3<br>No, all are unclean.....4                                                                   | <input type="checkbox"/>  | <input type="checkbox"/>  |
| 213 | How many rooms or areas in the building have water connection?              | Number<br>Don't know: 98                                                                                                                                                                                        | _ _ _ _ _ _ _             | _ _ _ _ _ _ _             |
| 214 | Are the water outlets are functional in toilet?                             | Yes.....1<br>No .....2                                                                                                                                                                                          | <input type="checkbox"/>  | <input type="checkbox"/>  |
| 215 | Floor space of waiting rooms/space for clients                              | Floor space in sq meters                                                                                                                                                                                        | _ _ _ _ _ _ _             | _ _ _ _ _ _ _             |
| 216 | How many seating spaces are there in waiting rooms/spaces?                  | Number<br>Don't know: 98                                                                                                                                                                                        | _ _ _ _ _ _ _             | _ _ _ _ _ _ _             |
| 217 | Are the waiting areas/rooms clean?                                          | Yes.....1<br>No .....2                                                                                                                                                                                          | <input type="checkbox"/>  | <input type="checkbox"/>  |
| 218 | Floor space of outpatient consultation (not including consultant's offices) | Floor space in sq meters                                                                                                                                                                                        | _ _ _ _ _ _ _             | _ _ _ _ _ _ _             |

| No  | Questions/ Items                                                                                                                        | Responses and codes       | Building/<br>Structure #1 | Building/<br>Structure #2 |
|-----|-----------------------------------------------------------------------------------------------------------------------------------------|---------------------------|---------------------------|---------------------------|
| 219 | Is there at least one site in the outpatient clinic area where both auditory and visual privacy can be maintained for client services?  | Yes.....1<br>No .....2    | <input type="checkbox"/>  | <input type="checkbox"/>  |
| 220 | Is the building is accessible to persons with disabilities (e.g., wheel chair ramps, elevators if more than one floor, hand rails etc.) | Yes.....1<br>No .....2    | <input type="checkbox"/>  | <input type="checkbox"/>  |
| 221 | Floor space in the emergency department including waiting space                                                                         | Floor space in sq meters  | _ _ _ _ _ _ _ _           | _ _ _ _ _ _ _ _           |
| 222 | Floor space for blood bank, blood donation space, etc.                                                                                  | Floor space in sq meters  | _ _ _ _ _ _ _ _           | _ _ _ _ _ _ _ _           |
| 223 | Number of observation beds in the building/ Structure (not including inpatient beds)                                                    | Number<br>Don't know: 998 | _ _ _ _ _                 | _ _ _ _ _                 |
| 224 | Number of inpatient wards in the building                                                                                               | Number<br>Don't know: 998 | _ _ _ _ _                 | _ _ _ _ _                 |
| 225 | Floor space of general adult wards                                                                                                      | Floor space in sq meters  | _ _ _ _ _ _ _ _           | _ _ _ _ _ _ _ _           |
| 226 | Number of inpatient beds in general adult wards (according to National Medical Standards)                                               | Number<br>Don't know: 998 | _ _ _ _ _                 | _ _ _ _ _                 |
| 227 | How many patients are in the general ward today?                                                                                        | Number<br>Don't know: 998 | _ _ _ _ _                 | _ _ _ _ _                 |
| 228 | Floor space of pediatric wards                                                                                                          | Floor space in sq meters  | _ _ _ _ _ _ _ _           | _ _ _ _ _ _ _ _           |
| 229 | Number of inpatient beds in pediatric wards                                                                                             | Number<br>Don't know: 998 | _ _ _ _ _                 | _ _ _ _ _                 |
| 230 | Number of beds in pediatric wards (according to National Medical Standards)                                                             | Number<br>Don't know: 998 | _ _ _ _ _                 | _ _ _ _ _                 |
| 231 | How many patients are in the pediatric ward today?                                                                                      | Number<br>Don't know: 998 | _ _ _ _ _                 | _ _ _ _ _                 |
| 232 | Floor space of surgery wards                                                                                                            | Floor space in sq meters  | _ _ _ _ _ _ _ _           | _ _ _ _ _ _ _ _           |
| 233 | Number of inpatient beds in surgery wards (according to National Medical Standards)                                                     | Number<br>Don't know: 998 | _ _ _ _ _                 | _ _ _ _ _                 |
| 234 | How many patients are in the surgery ward today?                                                                                        | Number<br>Don't know: 998 | _ _ _ _ _                 | _ _ _ _ _                 |
| 235 | Other wards (specify)<br>_____ ward                                                                                                     | Floor space in sq meters  | _ _ _ _ _ _ _ _           | _ _ _ _ _ _ _ _           |
| 236 | Number of inpatient beds in<br>_____ ward                                                                                               | Number<br>Don't know: 998 | _ _ _ _ _                 | _ _ _ _ _                 |
| 237 | How many patients are in the<br>_____ ward today?                                                                                       | Number<br>Don't know: 998 | _ _ _ _ _                 | _ _ _ _ _                 |
| 238 | Other wards (specify)<br>_____ ward                                                                                                     | Floor space in sq meters  | _ _ _ _ _ _ _ _           | _ _ _ _ _ _ _ _           |
| 239 | Number of inpatient beds in<br>_____ ward                                                                                               | Number<br>Don't know: 998 | _ _ _ _ _                 | _ _ _ _ _                 |
| 240 | How many patients are in the<br>_____ ward today?                                                                                       | Number<br>Don't know: 998 | _ _ _ _ _                 | _ _ _ _ _                 |

| No  | Questions/ Items                                                             | Responses and codes                                             | Building/<br>Structure #1 | Building/<br>Structure #2 |
|-----|------------------------------------------------------------------------------|-----------------------------------------------------------------|---------------------------|---------------------------|
| 241 | Condition of the mattresses on the beds?                                     | Good.....1<br>Not so good/not so bad.....2<br>Bad.....3         | <input type="checkbox"/>  | <input type="checkbox"/>  |
| 242 | Are there patients on floors in any of the wards or any other areas?         | Yes.....1<br>No .....2                                          | <input type="checkbox"/>  | <input type="checkbox"/>  |
| 243 | Are the inpatient areas clean?                                               | Yes.....1<br>No .....2                                          | <input type="checkbox"/>  | <input type="checkbox"/>  |
| 244 | Area of laboratory and diagnostic services including waiting areas           | Floor space in sq meters                                        | _ _ _ _ _ _ _             | _ _ _ _ _ _ _             |
| 245 | Are the lab/diagnostic services areas clean?                                 | Yes.....1<br>No .....2                                          | <input type="checkbox"/>  | <input type="checkbox"/>  |
| 246 | Area used for drug, supply and medical instrument storage                    | Floor space in sq meters                                        | _ _ _ _ _ _ _             | _ _ _ _ _ _ _             |
| 247 | Floor space in sq meters used for drug dispensing (if separate from storage) | Floor space in sq meters                                        | _ _ _ _ _ _ _             | _ _ _ _ _ _ _             |
| 248 | Floor space in sq meters of delivery rooms                                   | Floor space in sq meters                                        | _ _ _ _ _ _ _             | _ _ _ _ _ _ _             |
| 249 | How many delivery rooms are there in this building?                          | Number<br>Don't know: 998                                       | _ _ _ _ _ _ _             | _ _ _ _ _ _ _             |
| 250 | Are the delivery rooms equipped with delivery beds, lights, etc.?            | Yes.....1<br>No .....2                                          | <input type="checkbox"/>  | <input type="checkbox"/>  |
| 251 | Did the facility deliver babies in last seven days?                          | Yes.....1<br>No .....2                                          | <input type="checkbox"/>  | <input type="checkbox"/>  |
| 252 | Are the delivery rooms clean?                                                | Yes.....1<br>No .....2                                          | <input type="checkbox"/>  | <input type="checkbox"/>  |
| 253 | Floor space in sq meters of operation theaters                               | Floor space in sq meters                                        | _ _ _ _ _ _ _             | _ _ _ _ _ _ _             |
| 254 | How many operation theaters are there in the building?                       | Number<br>Don't know: 998                                       | _ _ _ _ _ _ _             | _ _ _ _ _ _ _             |
| 255 | Are the operation theaters functional and used regularly?                    | Yes.....1<br>No .....2                                          | <input type="checkbox"/>  | <input type="checkbox"/>  |
| 256 | Floor space in sq meters used by administrative personnel                    | Floor space in sq meters                                        | _ _ _ _ _ _ _             | _ _ _ _ _ _ _             |
| 257 | Floor space in sq meters used by laundry services                            | Floor space in sq meters                                        | _ _ _ _ _ _ _             | _ _ _ _ _ _ _             |
| 258 | Floor space in sq meters used by food services and kitchen                   | Floor space in sq meters                                        | _ _ _ _ _ _ _             | _ _ _ _ _ _ _             |
| 259 | Floor space in sq meters of cafeteria for employees and clients              | Floor space in sq meters                                        | _ _ _ _ _ _ _             | _ _ _ _ _ _ _             |
| 260 | Meeting and other common areas for the use of facility personnel             | Floor space in sq meters                                        | _ _ _ _ _ _ _             | _ _ _ _ _ _ _             |
| 261 | Floor space used by research projects/ NGOs and other external entities      | Floor space in sq meters<br>(EXCLUDE DIRECT PATIENT CARE AREAS) | _ _ _ _ _ _ _             | _ _ _ _ _ _ _             |
| 262 | Floor space in sq meters used by security personnel                          | Floor space in sq meters                                        | _ _ _ _ _ _ _             | _ _ _ _ _ _ _             |
| 263 | Floor space in sq meters used by mortuary                                    | Floor space in sq meters                                        | _ _ _ _ _ _ _             | _ _ _ _ _ _ _             |
| 264 | How many private rooms are there for inpatient stays?                        | Number of rooms<br>Don't know: 98                               | _ _ _ _ _ _ _             | _ _ _ _ _ _ _             |
| 265 | How many beds are there in the private rooms?                                | Number<br>Don't know: 998                                       | _ _ _ _ _ _ _             | _ _ _ _ _ _ _             |
| 266 | Floor space in sq meters used by private rooms                               | Floor space in sq meters                                        | _ _ _ _ _ _ _             | _ _ _ _ _ _ _             |



## Section 2: Information on each of the buildings (USE ADDITIONAL FORMS IF NEEDED)

| No  | Questions/ Items                                                            | Responses and codes                                                                                                                                                                                              | Building/<br>Structure # _ _ | Building/<br>Structure # _ _ |
|-----|-----------------------------------------------------------------------------|------------------------------------------------------------------------------------------------------------------------------------------------------------------------------------------------------------------|------------------------------|------------------------------|
| 201 | Name of the structure/ building                                             |                                                                                                                                                                                                                  |                              |                              |
| 202 | Principal activities normally performed in the building/ structure          | Inpatient services.....1<br>Outpatient services.....2<br>Both inpatient and outpatient.....3<br>Lab/ diagnostic services.....4<br>Administrative offices.....5<br>Not used now.....6<br>Others .....8<br>Specify | <input type="checkbox"/>     | <input type="checkbox"/>     |
| 203 | Total floor space of the building                                           | Floor space in sq meters                                                                                                                                                                                         | _ _ _ _ _                    | _ _ _ _ _                    |
| 204 | Number of rooms in the structure (not including toilets, closets, hallways) | Number<br>Don't know: 998                                                                                                                                                                                        | _ _ _ _ _                    | _ _ _ _ _                    |
| 205 | Do windows and doors of the building need repairs?                          | No repairs needed .....1<br>Few repairs needed.....2<br>Many repairs needed.....3                                                                                                                                | <input type="checkbox"/>     | <input type="checkbox"/>     |
| 206 | Do interior walls and roof of the building need repairs?                    | No repairs needed .....1<br>Few repairs needed.....2<br>Many repairs needed.....3                                                                                                                                | <input type="checkbox"/>     | <input type="checkbox"/>     |
| 207 | Does electric supply system of the facility need repairs?                   | No repairs needed .....1<br>Few repairs needed.....2<br>Many repairs needed.....3                                                                                                                                | <input type="checkbox"/>     | <input type="checkbox"/>     |
| 208 | Does water supply system of the facility need repair works?                 | No repairs needed .....1<br>Few repairs needed.....2<br>Many repairs needed.....3                                                                                                                                | <input type="checkbox"/>     | <input type="checkbox"/>     |
| 209 | Does toilet (latrine) for clients' use of the facility need repair works?   | No repairs needed .....1<br>Few repairs needed.....2<br>Many repairs needed.....3<br>Not present.....4                                                                                                           | <input type="checkbox"/>     | <input type="checkbox"/>     |
| 210 | Number of toilets                                                           | Number<br>Don't know: 98                                                                                                                                                                                         | _ _ _                        | _ _ _                        |
| 211 | Are most of the toilets functional?                                         | Yes.....1<br>No .....2                                                                                                                                                                                           | <input type="checkbox"/>     | <input type="checkbox"/>     |
| 212 | Are the toilets clean?                                                      | Yes, all the toilets are clean.....1<br>Yes, most of the toilets are clean.....2<br>No, most are not clean.....3<br>No, all are unclean.....4                                                                    | <input type="checkbox"/>     | <input type="checkbox"/>     |
| 213 | How many rooms or areas in the building have water connection?              | Number<br>Don't know: 98                                                                                                                                                                                         | _ _ _                        | _ _ _                        |
| 214 | Are the water outlets are functional in toilet?                             | Yes.....1<br>No .....2                                                                                                                                                                                           | <input type="checkbox"/>     | <input type="checkbox"/>     |
| 215 | Floor space of waiting rooms/space for clients                              | Floor space in sq meters                                                                                                                                                                                         | _ _ _ _ _                    | _ _ _ _ _                    |
| 216 | How many seating spaces are there in waiting rooms/spaces?                  | Number<br>Don't know: 98                                                                                                                                                                                         | _ _ _                        | _ _ _                        |
| 217 | Are the waiting areas/rooms clean?                                          | Yes.....1<br>No .....2                                                                                                                                                                                           | <input type="checkbox"/>     | <input type="checkbox"/>     |
| 218 | Floor space of outpatient consultation (not including consultant's offices) | Floor space in sq meters                                                                                                                                                                                         | _ _ _ _ _                    | _ _ _ _ _                    |

| No  | Questions/ Items                                                                                                                        | Responses and codes       | Building/<br>Structure # _ _ | Building/<br>Structure # _ _ |
|-----|-----------------------------------------------------------------------------------------------------------------------------------------|---------------------------|------------------------------|------------------------------|
| 219 | Is there at least one site in the outpatient clinic area where both auditory and visual privacy can be maintained for client services?  | Yes.....1<br>No .....2    | <input type="checkbox"/>     | <input type="checkbox"/>     |
| 220 | Is the building is accessible to persons with disabilities (e.g., wheel chair ramps, elevators if more than one floor, hand rails etc.) | Yes.....1<br>No .....2    | <input type="checkbox"/>     | <input type="checkbox"/>     |
| 221 | Floor space in the emergency department including waiting space                                                                         | Floor space in sq meters  | _ _ _ _ _ _ _                | _ _ _ _ _ _ _                |
| 222 | Floor space for blood bank, blood donation space, etc.                                                                                  | Floor space in sq meters  | _ _ _ _ _ _ _                | _ _ _ _ _ _ _                |
| 223 | Number of observation beds in the building/ Structure (not including inpatient beds)                                                    | Number<br>Don't know: 998 | _ _ _ _                      | _ _ _ _                      |
| 224 | Number of inpatient wards in the building                                                                                               | Number<br>Don't know: 998 | _ _ _ _                      | _ _ _ _                      |
| 225 | Floor space of general adult wards                                                                                                      | Floor space in sq meters  | _ _ _ _ _ _ _                | _ _ _ _ _ _ _                |
| 226 | Number of inpatient beds in general adult wards (according to National Medical Standards)                                               | Number<br>Don't know: 998 | _ _ _ _                      | _ _ _ _                      |
| 227 | How many patients are in the general ward today?                                                                                        | Number<br>Don't know: 998 | _ _ _ _                      | _ _ _ _                      |
| 228 | Floor space of pediatric wards                                                                                                          | Floor space in sq meters  | _ _ _ _ _ _ _                | _ _ _ _ _ _ _                |
| 229 | Number of inpatient beds in pediatric wards                                                                                             | Number<br>Don't know: 998 | _ _ _ _                      | _ _ _ _                      |
| 230 | Number of beds in pediatric wards (according to National Medical Standards)                                                             | Number<br>Don't know: 998 | _ _ _ _                      | _ _ _ _                      |
| 231 | How many patients are in the pediatric ward today?                                                                                      | Number<br>Don't know: 998 | _ _ _ _                      | _ _ _ _                      |
| 232 | Floor space of surgery wards                                                                                                            | Floor space in sq meters  | _ _ _ _ _ _ _                | _ _ _ _ _ _ _                |
| 233 | Number of inpatient beds in surgery wards (according to National Medical Standards)                                                     | Number<br>Don't know: 998 | _ _ _ _                      | _ _ _ _                      |
| 234 | How many patients are in the surgery ward today?                                                                                        | Number<br>Don't know: 998 | _ _ _ _                      | _ _ _ _                      |
| 235 | Other wards (specify)<br>_____ward                                                                                                      | Floor space in sq meters  | _ _ _ _ _ _ _                | _ _ _ _ _ _ _                |
| 236 | Number of inpatient beds in<br>_____ward                                                                                                | Number<br>Don't know: 998 | _ _ _ _                      | _ _ _ _                      |
| 237 | How many patients are in the<br>_____ward today?                                                                                        | Number<br>Don't know: 998 | _ _ _ _                      | _ _ _ _                      |
| 238 | Other wards (specify)<br>_____ward                                                                                                      | Floor space in sq meters  | _ _ _ _ _ _ _                | _ _ _ _ _ _ _                |
| 239 | Number of inpatient beds in<br>_____ward                                                                                                | Number<br>Don't know: 998 | _ _ _ _                      | _ _ _ _                      |
| 240 | How many patients are in the<br>_____ward today?                                                                                        | Number<br>Don't know: 998 | _ _ _ _                      | _ _ _ _                      |

| No  | Questions/ Items                                                             | Responses and codes                                             | Building/<br>Structure # _ _ | Building/<br>Structure # _ _ |
|-----|------------------------------------------------------------------------------|-----------------------------------------------------------------|------------------------------|------------------------------|
| 241 | Condition of the mattresses on the beds?                                     | Good.....1<br>Not so good/not so bad.....2<br>Bad.....3         | <input type="checkbox"/>     | <input type="checkbox"/>     |
| 242 | Are there patients on floors in any of the wards or any other areas?         | Yes.....1<br>No .....2                                          | <input type="checkbox"/>     | <input type="checkbox"/>     |
| 243 | Are the inpatient areas clean?                                               | Yes.....1<br>No .....2                                          | <input type="checkbox"/>     | <input type="checkbox"/>     |
| 244 | Area of laboratory and diagnostic services including waiting areas           | Floor space in sq meters                                        | _ _ _ _ _                    | _ _ _ _ _                    |
| 245 | Are the lab/diagnostic services areas clean?                                 | Yes.....1<br>No .....2                                          | <input type="checkbox"/>     | <input type="checkbox"/>     |
| 246 | Area used for drug, supply and medical instrument storage                    | Floor space in sq meters                                        | _ _ _ _ _                    | _ _ _ _ _                    |
| 247 | Floor space in sq meters used for drug dispensing (if separate from storage) | Floor space in sq meters                                        | _ _ _ _ _                    | _ _ _ _ _                    |
| 248 | Floor space in sq meters of delivery rooms                                   | Floor space in sq meters                                        | _ _ _ _ _                    | _ _ _ _ _                    |
| 249 | How many delivery rooms are there in this building?                          | Number<br>Don't know: 998                                       | _ _ _ _                      | _ _ _ _                      |
| 250 | Are the delivery rooms equipped with delivery beds, lights, etc.?            | Yes.....1<br>No .....2                                          | <input type="checkbox"/>     | <input type="checkbox"/>     |
| 251 | Did the facility deliver babies in last seven days?                          | Yes.....1<br>No .....2                                          | <input type="checkbox"/>     | <input type="checkbox"/>     |
| 252 | Are the delivery rooms clean?                                                | Yes.....1<br>No .....2                                          | <input type="checkbox"/>     | <input type="checkbox"/>     |
| 253 | Floor space in sq meters of operation theaters                               | Floor space in sq meters                                        | _ _ _ _ _                    | _ _ _ _ _                    |
| 254 | How many operation theaters are there in the building?                       | Number<br>Don't know: 998                                       | _ _ _ _                      | _ _ _ _                      |
| 255 | Are the operation theaters functional and used regularly?                    | Yes.....1<br>No .....2                                          | <input type="checkbox"/>     | <input type="checkbox"/>     |
| 256 | Floor space in sq meters used by administrative personnel                    | Floor space in sq meters                                        | _ _ _ _ _                    | _ _ _ _ _                    |
| 257 | Floor space in sq meters used by laundry services                            | Floor space in sq meters                                        | _ _ _ _ _                    | _ _ _ _ _                    |
| 258 | Floor space in sq meters used by food services and kitchen                   | Floor space in sq meters                                        | _ _ _ _ _                    | _ _ _ _ _                    |
| 259 | Floor space in sq meters of cafeteria for employees and clients              | Floor space in sq meters                                        | _ _ _ _ _                    | _ _ _ _ _                    |
| 260 | Meeting and other common areas for the use of facility personnel             | Floor space in sq meters                                        | _ _ _ _ _                    | _ _ _ _ _                    |
| 261 | Floor space used by research projects/ NGOs and other external entities      | Floor space in sq meters<br>(EXCLUDE DIRECT PATIENT CARE AREAS) | _ _ _ _ _                    | _ _ _ _ _                    |
| 262 | Floor space in sq meters used by security personnel                          | Floor space in sq meters                                        | _ _ _ _ _                    | _ _ _ _ _                    |
| 263 | Floor space in sq meters used by mortuary                                    | Floor space in sq meters                                        | _ _ _ _ _                    | _ _ _ _ _                    |
| 264 | How many private rooms are there for inpatient stays?                        | Number of rooms<br>Don't know: 98                               | _ _ _                        | _ _ _                        |
| 265 | How many beds are there in the private rooms?                                | Number<br>Don't know: 998                                       | _ _ _ _                      | _ _ _ _                      |
| 266 | Floor space in sq meters used by private rooms                               | Floor space in sq meters                                        | _ _ _ _ _                    | _ _ _ _ _                    |

## Section 3: Communications between this health facility and a referral facility

| No  | Questions and Filters                                                                                                 | Coding categories                                                                                                                                                                                  | Response                                                             | Skip |
|-----|-----------------------------------------------------------------------------------------------------------------------|----------------------------------------------------------------------------------------------------------------------------------------------------------------------------------------------------|----------------------------------------------------------------------|------|
| 301 | How far is the closest referral facility from this facility?                                                          | Kilometers<br>Don't know..... 998<br>Not applicable..... 999                                                                                                                                       | <input type="text"/>                                                 |      |
| 302 | What type of facility is that (the referral facility)?                                                                | NH..... 1<br>RH..... 2<br>PH..... 3<br>DH..... 4<br>Other..... 9                                                                                                                                   | <input type="checkbox"/>                                             |      |
| 303 | On the average, how many patients are referred to other facilities in a month from this facility?                     | Number of patients referred<br>Don't know..... 998                                                                                                                                                 | <input type="text"/>                                                 |      |
| 304 | How long does it take to transfer sick patients to the referral hospital if transported by ambulance (hours and days) | Hours and/or<br>days                                                                                                                                                                               | <input type="text"/> hours<br><input type="text"/> days              |      |
| 305 | What is the average cost per trip for the patients, please specify                                                    | A. Travel person: _____ PNG kina<br>B. Accommodation per person: _____ PNG kina<br>C. Per diem per person _____ PNG kina                                                                           | <input type="text"/><br><input type="text"/><br><input type="text"/> |      |
| 306 | Do you budget specifically for patient transfers?                                                                     | Yes ..... 1<br>No ..... 2                                                                                                                                                                          | <input type="checkbox"/>                                             |      |
| 307 | Were the referred patients treated at the referral facility?                                                          | Yes..... 1<br>No..... 2<br>Some, but not all..... 3<br>Don't know..... 8                                                                                                                           | <input type="checkbox"/>                                             |      |
| 308 | Did the referral facilities refer some of the referred patients to another facility?                                  | Yes..... 1<br>No..... 2<br>Don't know..... 8                                                                                                                                                       | <input type="checkbox"/>                                             |      |
| 309 | What is the mode of communication between this facility and the usual referral center?                                | No formal communication system..... 1<br>Only discharge card..... 2<br>Telephone or mobile phone..... 3<br>Two Way Radio..... 4<br>Other means..... 9<br>(specify)                                 | <input type="checkbox"/>                                             |      |
| 310 | What is the most common form of transport when referring patients?                                                    | Using the facility's ambulance/vehicle..... 1<br>Using commercially available cars..... 2<br>Using vans..... 3<br>Using boats..... 4<br>Plane/helicopter..... 5<br>Other means..... 9<br>(specify) | <input type="checkbox"/>                                             |      |
| 311 | Does a health worker travel with a sick patient to the referral hospital?                                             | Yes ..... 1<br>No ..... 2                                                                                                                                                                          | <input type="checkbox"/>                                             |      |
| 312 | Does the referral hospital have to verbally confirm they will accept the patient before they can be transferred?      | Yes ..... 1<br>No ..... 2                                                                                                                                                                          | <input type="checkbox"/>                                             |      |

## Section 4: Repair and Medical Waste Management

| No  | Questions and Filters                                                                                                 | Coding categories                                                                                                                                                                                                                                                             | Response                 | Skip         |
|-----|-----------------------------------------------------------------------------------------------------------------------|-------------------------------------------------------------------------------------------------------------------------------------------------------------------------------------------------------------------------------------------------------------------------------|--------------------------|--------------|
| 401 | Who should be responsible for ensuring infrastructure maintenance is carried out?                                     | Province.....1<br>District.....2<br>Church agency.....3<br>This facility.....4<br>Referral health facility.....5                                                                                                                                                              | <input type="checkbox"/> |              |
| 402 | Is it desirable for other maintenance (i.e. anything other than really simple tasks) being managed at a higher level? | Yes .....1<br>No .....2                                                                                                                                                                                                                                                       | <input type="checkbox"/> | If 2<br>→404 |
| 403 | If yes, by who?                                                                                                       | Province.....1<br>District.....2<br>Church agency.....3<br>This facility.....4<br>Referral health facility.....5                                                                                                                                                              | <input type="checkbox"/> |              |
| 404 | Who should be responsible for ensuring basic utilities are maintained at the health facility?                         | Province.....1<br>District.....2<br>Church agency.....3<br>This facility.....4<br>Referral health facility.....5                                                                                                                                                              | <input type="checkbox"/> |              |
| 405 | Comments on repair needs or types of repair problems of the facility:                                                 |                                                                                                                                                                                                                                                                               |                          |              |
|     | <b>Medical waste treatment</b> Verify use if incinerator use log is available                                         |                                                                                                                                                                                                                                                                               |                          |              |
| 406 | Is there any incinerator (high temperature) available in the facility?                                                | Available and used.....1<br>Available but not used.....2<br>Not available.....3                                                                                                                                                                                               | <input type="checkbox"/> |              |
| 407 | Is there any incinerator (1 chamber drum/brick) available in the facility?                                            | Available and used.....1<br>Available but not used.....2<br>Not available.....3                                                                                                                                                                                               | <input type="checkbox"/> |              |
| 408 | Is there any burial pit for waste available in the facility?                                                          | Available and used.....1<br>Available but not used.....2<br>Not available.....3                                                                                                                                                                                               | <input type="checkbox"/> |              |
| 409 | Is there any system of segregating medical wastes into three colored waste baskets available in the facility?         | Available and used.....1<br>Available but not used.....2<br>Not available.....3                                                                                                                                                                                               | <input type="checkbox"/> |              |
| 410 | Disposal practice of sharps (needles, glass, surgical instruments, etc.)                                              | Incinerator.....1<br>Burn and bury.....2<br>Bury but do not burn.....3<br>Burn but do not bury.....4<br>Put in a covered pit (could be latrine).....5<br>Put in an open pit.....6<br>Store, collect and move offsite.....7<br>Just throw out in the open.....8<br>Other.....9 | <input type="checkbox"/> |              |
| 411 | Disposal practice of biomedical wastes (placenta, human body parts, laboratory waste, etc.)                           | Incinerator.....1<br>Burn and bury.....2<br>Bury but do not burn.....3<br>Burn but do not bury.....4<br>Put in a covered pit (could be latrine).....5<br>Put in an open pit.....6<br>Store, collect and move offsite.....7<br>Just throw out in the open.....8<br>Other.....9 | <input type="checkbox"/> |              |

## Section 5: Food Services and Kitchen Area

| Food Services and availability |                                                                                                                        |                                                                                                                       |                          |              |
|--------------------------------|------------------------------------------------------------------------------------------------------------------------|-----------------------------------------------------------------------------------------------------------------------|--------------------------|--------------|
| No                             | Questions and Filters                                                                                                  | Coding categories                                                                                                     | Response                 | Skip         |
| 501                            | Do you provide food service to inpatients?                                                                             | Yes.....1<br>No.....2                                                                                                 | <input type="checkbox"/> | If 2<br>→601 |
| 502                            | Do you charge inpatients any money for food?                                                                           | Yes .....1<br>No .....2                                                                                               | <input type="checkbox"/> |              |
| 503                            | How much do you charge for food per person per day?                                                                    | PGKina.<br>(000 if patients are not charged)                                                                          | _ _ _ _                  |              |
| 504                            | What is the cost of food per person per day?                                                                           | PGKina                                                                                                                | _ _ _ _                  |              |
| 505                            | Number of patients who were served with food yesterday?                                                                | Number of patients#                                                                                                   | _ _ _ _                  |              |
| 506                            | Is there a protocol for feeding hospitalized infants (<1 year)?                                                        | Yes.....1<br>No.....2                                                                                                 | <input type="checkbox"/> |              |
| 507                            | How many meals are typically provided for infants in 24 hours?                                                         | Two to three times.....1<br>Four to five times.....2<br>Six times or more.....3                                       | <input type="checkbox"/> |              |
| 508                            | Is the budget allocated for food service enough for buying groceries and other needs for all patients in the facility? | Yes .....1<br>No.....2                                                                                                | <input type="checkbox"/> |              |
| 509                            | Does the facility contract out food services?                                                                          | Yes, only grocery procurement contracted out.....1<br>Yes, cooking +other food services contracted out..2<br>No.....3 | <input type="checkbox"/> |              |
| 510                            | Is the food prepared on-site or prepared outside the facility?                                                         | Prepared in the facility.....1<br>Not prepared in the facility.....2                                                  | <input type="checkbox"/> | If 2<br>→601 |
| 511                            | Is there a chimney or working exhaust fan in cooking area?                                                             | Yes .....1<br>No.....2                                                                                                | <input type="checkbox"/> |              |
| 512                            | Is soap/detergent present in cooking area for washing hands?                                                           | Yes .....1<br>No.....2                                                                                                | <input type="checkbox"/> |              |
| 513                            | Is soap/detergent present for washing pots, pans, plates, utensils                                                     | Yes .....1<br>No.....2                                                                                                | <input type="checkbox"/> |              |
| 514                            | Is the kitchen floor clean (no garbage on floor)?                                                                      | Yes .....1<br>No.....2                                                                                                | <input type="checkbox"/> |              |
| 515                            | Is the wiping cloth used in the kitchen is clean, not smelly?                                                          | Yes .....1<br>No.....2                                                                                                | <input type="checkbox"/> |              |
| 516                            | Are there signs of cockroach/mice infestation in the kitchen area?                                                     | Yes .....1<br>No.....2                                                                                                | <input type="checkbox"/> |              |
| 517                            | Do cooking personnel tie hair back and/or wear caps?                                                                   | Yes .....1<br>No.....2                                                                                                | <input type="checkbox"/> |              |
| 518                            | Do cooks wear gloves while handling food?                                                                              | Yes .....1<br>No.....2                                                                                                | <input type="checkbox"/> |              |
| 519                            | Are prepared foods covered?                                                                                            | Yes .....1<br>No.....2                                                                                                | <input type="checkbox"/> |              |

## Section 6: Services and other supplies

## Section 6.1: Maternal and neonatal care: Antenatal care

|                                                                                                                                                                               | Questions and Filters                                                                                                          | Coding categories                                                                                                   | Response                                                             | Skip       |
|-------------------------------------------------------------------------------------------------------------------------------------------------------------------------------|--------------------------------------------------------------------------------------------------------------------------------|---------------------------------------------------------------------------------------------------------------------|----------------------------------------------------------------------|------------|
| 601                                                                                                                                                                           | Are Antenatal services provided at this facility?                                                                              | Yes.....1<br>No.....2                                                                                               | <input type="checkbox"/>                                             | If 2 → 604 |
| 602                                                                                                                                                                           | How many days in a week the facility provide ANC?                                                                              | #Days in a week                                                                                                     | <input type="text"/>                                                 |            |
| 603                                                                                                                                                                           | Number of antenatal outreach clinics held in the last 3 months?                                                                | Number of outreach clinics held<br>Don't know.....998                                                               | <input type="text"/>                                                 |            |
| <b>Antenatal clinic equipment and supplies:</b> check to see whether the following items are present and functional in or near the area where antenatal services are provided |                                                                                                                                |                                                                                                                     |                                                                      |            |
| 604                                                                                                                                                                           | Fetal stethoscope (or foetal monitor)                                                                                          | A. Number<br>B. Number Working<br>C. Number regularly used                                                          | <input type="text"/><br><input type="text"/><br><input type="text"/> |            |
| 605                                                                                                                                                                           | Stethoscope and blood pressure cuff                                                                                            | A. Number<br>B. Number Working<br>C. Number regularly used                                                          | <input type="text"/><br><input type="text"/><br><input type="text"/> |            |
| 606                                                                                                                                                                           | Tape measure                                                                                                                   | A. Number<br>B. Number Working<br>C. Number regularly used                                                          | <input type="text"/><br><input type="text"/><br><input type="text"/> |            |
| 607                                                                                                                                                                           | Scale                                                                                                                          | A. Number<br>B. Number Working<br>C. Number regularly used                                                          | <input type="text"/><br><input type="text"/><br><input type="text"/> |            |
| 608                                                                                                                                                                           | Ultrasound Machine (and gel)                                                                                                   | A. Number<br>B. Number Working<br>C. Number regularly used                                                          | <input type="text"/><br><input type="text"/><br><input type="text"/> |            |
| <b>MATERNAL AND NEONATAL CARE: Deliveries.</b>                                                                                                                                |                                                                                                                                |                                                                                                                     |                                                                      |            |
| <i>Ask the in charge to assist you with questions in this section.</i>                                                                                                        |                                                                                                                                |                                                                                                                     |                                                                      |            |
| 609                                                                                                                                                                           | Does the facility staff assist with deliveries, either in the facility or in the community?                                    | Yes ..... 1<br>No.....2                                                                                             | <input type="checkbox"/>                                             | If 2 → 611 |
| 610                                                                                                                                                                           | Does the facility staff assist with deliveries only in the facility, only in the community, or in both facility and community? | Only in facility..... 1<br>Only in community.....2<br>Both in facility and community.....3                          | <input type="checkbox"/>                                             |            |
| 611                                                                                                                                                                           | Does this facility have the capacity to administer antibiotics, oxytocics, and anticonvulsants for delivery of babies?         | Yes, can do all of the three .....1<br>Can do two of the three .....2<br>Can do one of the three .....3<br>No.....4 | <input type="checkbox"/>                                             |            |
| 612                                                                                                                                                                           | Does this facility have the ability/capacity for manual removal of the placenta?                                               | Yes, can do now ..... 1<br>Usually, but nit now ..... 2<br>Does not have the capacity ..... 3                       | <input type="checkbox"/>                                             |            |
| 613                                                                                                                                                                           | Does this facility have the capacity to remove retained products following miscarriage or abortion?                            | Yes, can do now ..... 1<br>Usually, but not now ..... 2<br>Does not have the capacity ..... 3                       | <input type="checkbox"/>                                             |            |
| 614                                                                                                                                                                           | Does this facility have the capacity to do assisted vaginal delivery, preferably with vacuum extractor?                        | Yes, can do now ..... 1<br>Usually, but not now ..... 2<br>Does not have the capacity ..... 3                       | <input type="checkbox"/>                                             |            |
| 615                                                                                                                                                                           | Does the facility have the capacity to provide newborn care?                                                                   | Yes, can do now ..... 1<br>Usually, but not now ..... 2<br>Does not have the capacity ..... 3                       | <input type="checkbox"/>                                             |            |
| 616                                                                                                                                                                           | Does the facility have the capacity to manage caesarean section?                                                               | Yes, can do now ..... 1<br>Usually, but not now ..... 2<br>Does not have the capacity ..... 3                       | <input type="checkbox"/>                                             |            |

|                                                                                                                                      |                                                                                                                                          |                                                                                            |                          |  |
|--------------------------------------------------------------------------------------------------------------------------------------|------------------------------------------------------------------------------------------------------------------------------------------|--------------------------------------------------------------------------------------------|--------------------------|--|
| 617                                                                                                                                  | Does the facility have the capacity to do safe blood transfusion?                                                                        | Yes, can do now .....1<br>Usually, but not now .....2<br>Does not have the capacity .....3 | <input type="checkbox"/> |  |
| 618                                                                                                                                  | Does the facility have the capacity to administer anesthesia?                                                                            | Yes, can do now .....1<br>Usually, but not now .....2<br>Does not have the capacity .....3 | <input type="checkbox"/> |  |
| 619                                                                                                                                  | Does the facility have the capacity to care for sick and low-birth weight newborns, including resuscitation?                             | Yes, can do now .....1<br>Usually, but not now .....2<br>Does not have the capacity .....3 | <input type="checkbox"/> |  |
| 620                                                                                                                                  | Does the facility have at least two skilled attendants covering 24 hours a day and seven days a week, assisted by trained support staff? | Yes .....1<br>No.....2                                                                     | <input type="checkbox"/> |  |
| <b>MATERNAL AND NEONATAL CARE: Delivery room equipment and supplies</b>                                                              |                                                                                                                                          |                                                                                            |                          |  |
| <i>Check to see whether the following items are present and functional in or near the delivery room.</i>                             |                                                                                                                                          |                                                                                            |                          |  |
| 621                                                                                                                                  | Delivery kit (instruments, supplies)                                                                                                     | Present and complete..... 1<br>Present but not complete..... 2<br>Not present.....3        | <input type="checkbox"/> |  |
| <i>check to see whether the following items are present and functional in or near the area where antenatal services are provided</i> |                                                                                                                                          |                                                                                            |                          |  |
| 622                                                                                                                                  | Stethoscope                                                                                                                              | A. Number<br>B. Number Working<br>C. Number regularly used                                 | <input type="checkbox"/> |  |
| 623                                                                                                                                  | Partograph                                                                                                                               | A. Number<br>B. Number Working<br>C. Number regularly used                                 | <input type="checkbox"/> |  |
| 624                                                                                                                                  | Pelvic procedure instruments like speculum                                                                                               | A. Number<br>B. Number Working<br>C. Number regularly used                                 | <input type="checkbox"/> |  |
| 625                                                                                                                                  | Delivery light                                                                                                                           | A. Number<br>B. Number Working<br>C. Number regularly used                                 | <input type="checkbox"/> |  |
| 626                                                                                                                                  | Sterilizer                                                                                                                               | A. Number<br>B. Number Working<br>C. Number regularly used                                 | <input type="checkbox"/> |  |
| 627                                                                                                                                  | Vacuum extractor                                                                                                                         | A. Number<br>B. Number Working<br>C. Number regularly used                                 | <input type="checkbox"/> |  |
| 628                                                                                                                                  | Forceps                                                                                                                                  | A. Number<br>B. Number Working<br>C. Number regularly used                                 | <input type="checkbox"/> |  |
| 629                                                                                                                                  | Manual vacuum aspirator/suction bulb                                                                                                     | A. Number<br>B. Number Working<br>C. Number regularly used                                 | <input type="checkbox"/> |  |
| 630                                                                                                                                  | Resuscitation bag , newborn                                                                                                              | A. Number<br>B. Number Working<br>C. Number regularly used                                 | <input type="checkbox"/> |  |
| 631                                                                                                                                  | Eye drops or ointment for newborn                                                                                                        | A. Number<br>B. Number Working<br>C. Number regularly used                                 | <input type="checkbox"/> |  |
| 632                                                                                                                                  | Needles and syringes (10-20 cc)                                                                                                          | A. Number<br>B. Number Working<br>C. Number regularly used                                 | <input type="checkbox"/> |  |



|                                                    |                                                       |                                                                                                                                                                                                                                                                |                                                            |                                                                      |               |
|----------------------------------------------------|-------------------------------------------------------|----------------------------------------------------------------------------------------------------------------------------------------------------------------------------------------------------------------------------------------------------------------|------------------------------------------------------------|----------------------------------------------------------------------|---------------|
| 633                                                | Sterile C-section instrument kits                     |                                                                                                                                                                                                                                                                | A. Number<br>B. Number Working<br>C. Number regularly used | <input type="text"/><br><input type="text"/><br><input type="text"/> |               |
| 634                                                | Cord supplies for new born: clamps, ties, scissors    |                                                                                                                                                                                                                                                                | A. Number<br>B. Number Working<br>C. Number regularly used | <input type="text"/><br><input type="text"/><br><input type="text"/> |               |
| 635                                                | IV sets, including sterilized needle and tube         |                                                                                                                                                                                                                                                                | A. Number<br>B. Number Working<br>C. Number regularly used | <input type="text"/><br><input type="text"/><br><input type="text"/> |               |
| 636                                                | IV fluids, including normal saline and ringer lactate |                                                                                                                                                                                                                                                                | A. Number<br>B. Number Working<br>C. Number regularly used | <input type="text"/><br><input type="text"/><br><input type="text"/> |               |
| <b>MATERNAL AND NEONATAL CARE: Postpartum Care</b> |                                                       |                                                                                                                                                                                                                                                                |                                                            |                                                                      |               |
| 637                                                | Are postpartum care services offered routinely?       | Yes, in the facility as part of routine services only.....1<br>Yes, in the facility as part of routine services and in special clinics...2<br>NO, not as part of routine services but only in special clinics.....3<br>NO, not offered at this facility .....4 |                                                            | <input type="checkbox"/>                                             | If 4<br>→ 645 |
| <b>Are the following services provided?</b>        |                                                       |                                                                                                                                                                                                                                                                |                                                            |                                                                      |               |
| 638                                                | Maternal examination & treatment                      | Yes ..... 1<br>No..... 2                                                                                                                                                                                                                                       |                                                            | <input type="checkbox"/>                                             |               |
| 639                                                | Breast feeding counseling                             | Yes ..... 1<br>No..... 2                                                                                                                                                                                                                                       |                                                            | <input type="checkbox"/>                                             |               |
| 640                                                | Newborn examination & treatment                       | Yes ..... 1<br>No..... 2                                                                                                                                                                                                                                       |                                                            | <input type="checkbox"/>                                             |               |
| 641                                                | Growth Monitoring & promotion                         | Yes ..... 1<br>No..... 2                                                                                                                                                                                                                                       |                                                            | <input type="checkbox"/>                                             |               |
| 642                                                | Vaccination counseling                                | Yes ..... 1<br>No..... 2                                                                                                                                                                                                                                       |                                                            | <input type="checkbox"/>                                             |               |
| 643                                                | Family planning counseling                            | Yes ..... 1<br>No..... 2                                                                                                                                                                                                                                       |                                                            | <input type="checkbox"/>                                             |               |
| 644                                                | Treatment of severe malnutrition                      | Yes ..... 1<br>No..... 2                                                                                                                                                                                                                                       |                                                            | <input type="checkbox"/>                                             |               |

**Section 6.2: Protocols, Guidelines and Templates**

| Ask to see the protocols and guidelines and check to see which of the following are present. |                                                        |                                       |                          |      |
|----------------------------------------------------------------------------------------------|--------------------------------------------------------|---------------------------------------|--------------------------|------|
| No                                                                                           | Questions and Filters                                  | Coding categories                     | Response                 | Skip |
| 645                                                                                          | IMCI chart book or wall chart                          | Present ..... 1<br>Not Present..... 2 | <input type="checkbox"/> |      |
| 646                                                                                          | ARI (NOT PART OF IMCI)                                 | Present ..... 1<br>Not Present..... 2 | <input type="checkbox"/> |      |
| 647                                                                                          | Diagnosis and treatment of diarrhea (NOT PART OF IMCI) | Present ..... 1<br>Not Present..... 2 | <input type="checkbox"/> |      |
| 648                                                                                          | Graphs for growth monitoring                           | Present ..... 1<br>Not Present..... 2 | <input type="checkbox"/> |      |
| 649                                                                                          | Treatment of severe malnutrition                       | Present ..... 1<br>Not Present..... 2 | <input type="checkbox"/> |      |
| 650                                                                                          | Tuberculosis diagnosis and treatment                   | Present ..... 1<br>Not Present..... 2 | <input type="checkbox"/> |      |
| 651                                                                                          | NHIS guidelines                                        | Present ..... 1<br>Not Present..... 2 | <input type="checkbox"/> |      |

|     |                                            |                                       |                          |  |
|-----|--------------------------------------------|---------------------------------------|--------------------------|--|
| 652 | Malaria Protocol                           | Present ..... 1<br>Not Present..... 2 | <input type="checkbox"/> |  |
| 653 | Immunization schedule                      | Present ..... 1<br>Not Present..... 2 | <input type="checkbox"/> |  |
| 654 | Family planning                            | Present ..... 1<br>Not Present..... 2 | <input type="checkbox"/> |  |
| 655 | Are patient education materials displayed? | Present ..... 1<br>Not Present..... 2 | <input type="checkbox"/> |  |

**Section 6.3: Laboratory tests**

| <i>Ask to see the protocols and guidelines and check to see which of the following are present.</i> |                                                                      |                                                                                                                              |                          |               |
|-----------------------------------------------------------------------------------------------------|----------------------------------------------------------------------|------------------------------------------------------------------------------------------------------------------------------|--------------------------|---------------|
| No                                                                                                  | Questions and Filters                                                | Coding categories                                                                                                            | Response                 | Skip          |
| 656                                                                                                 | Malaria tests (Malaria RDT)                                          | Able to do this test today ..... 1<br>Able to do this test in past 6 months but not today...2<br>Cannot do this test ..... 3 | <input type="checkbox"/> |               |
| 657                                                                                                 | Does this facility perform laboratory tests other than malaria test? | Yes ..... 1<br>No..... 2                                                                                                     | <input type="checkbox"/> | If 2<br>→ 670 |
| 658                                                                                                 | Anemia testing                                                       | Able to do this test today ..... 1<br>Able to do this test in past 6 months but not today...2<br>Cannot do this test ..... 3 | <input type="checkbox"/> |               |
| 659                                                                                                 | Urine for R/M/E                                                      | Able to do this test today ..... 1<br>Able to do this test in past 6 months but not today...2<br>Cannot do this test ..... 3 | <input type="checkbox"/> |               |
| 660                                                                                                 | Blood Glucose                                                        | Able to do this test today ..... 1<br>Able to do this test in past 6 months but not today...2<br>Cannot do this test ..... 3 | <input type="checkbox"/> |               |
| 661                                                                                                 | Stool for RE                                                         | Able to do this test today ..... 1<br>Able to do this test in past 6 months but not today...2<br>Cannot do this test ..... 3 | <input type="checkbox"/> |               |
| 662                                                                                                 | HIV Testing                                                          | Able to do this test today ..... 1<br>Able to do this test in past 6 months but not today...2<br>Cannot do this test ..... 3 | <input type="checkbox"/> |               |
| 663                                                                                                 | TB Smears                                                            | Able to do this test today ..... 1<br>Able to do this test in past 6 months but not today...2<br>Cannot do this test ..... 3 | <input type="checkbox"/> |               |
| 664                                                                                                 | Gram Stains                                                          | Able to do this test today ..... 1<br>Able to do this test in past 6 months but not today...2<br>Cannot do this test ..... 3 | <input type="checkbox"/> |               |
| 665                                                                                                 | Blood Typing and cross matching                                      | Able to do this test today ..... 1<br>Able to do this test in past 6 months but not today...2<br>Cannot do this test ..... 3 | <input type="checkbox"/> |               |
| 666                                                                                                 | Syphilis testing                                                     | Able to do this test today ..... 1<br>Able to do this test in past 6 months but not today...2<br>Cannot do this test ..... 3 | <input type="checkbox"/> |               |
| 667                                                                                                 | Liver function testing                                               | Able to do this test today ..... 1<br>Able to do this test in past 6 months but not today...2<br>Cannot do this test ..... 3 | <input type="checkbox"/> |               |
| 668                                                                                                 | Pregnancy testing                                                    | Able to do this test today ..... 1<br>Able to do this test in past 6 months but not today...2<br>Cannot do this test ..... 3 | <input type="checkbox"/> |               |
| 669                                                                                                 | Hepatitis                                                            | Able to do this test today ..... 1<br>Able to do this test in past 6 months but not today...2<br>Cannot do this test ..... 3 | <input type="checkbox"/> |               |

## Section 6.4: Pharmacy room, drug storage area and supply system

| No  | Questions and Filters                                                                                                        | Coding categories                                                                                                                                                                                                                                                                                                      | Response                 | Skip          |
|-----|------------------------------------------------------------------------------------------------------------------------------|------------------------------------------------------------------------------------------------------------------------------------------------------------------------------------------------------------------------------------------------------------------------------------------------------------------------|--------------------------|---------------|
| 670 | Is there a separate room/space for drug storage?                                                                             | Yes ..... 1<br>No ..... 2                                                                                                                                                                                                                                                                                              | <input type="checkbox"/> | If 2<br>→ 749 |
| 671 | Are doors and windows secured in the drug storage area?                                                                      | Yes ..... 1<br>No ..... 2                                                                                                                                                                                                                                                                                              | <input type="checkbox"/> |               |
| 672 | Drug storage area has ventilation?                                                                                           | Yes ..... 1<br>No ..... 2                                                                                                                                                                                                                                                                                              | <input type="checkbox"/> |               |
| 673 | Are there enough shelves for storing drugs/other supplies (nothing on the floor)?                                            | Yes ..... 1<br>No ..... 2                                                                                                                                                                                                                                                                                              | <input type="checkbox"/> |               |
| 674 | Are the stored items protected from sun?                                                                                     | Yes ..... 1<br>No ..... 2                                                                                                                                                                                                                                                                                              | <input type="checkbox"/> |               |
| 675 | Are the stored items protected from rain?                                                                                    | Yes ..... 1<br>No ..... 2                                                                                                                                                                                                                                                                                              | <input type="checkbox"/> |               |
| 676 | Is/are there functioning refrigerator/s for storing drugs?                                                                   | Yes ..... 1<br>No ..... 2                                                                                                                                                                                                                                                                                              | <input type="checkbox"/> |               |
| 677 | How many boxes of drugs did you receive in the last six months (Push system)?                                                | Number of Boxes                                                                                                                                                                                                                                                                                                        | _ _ _                    |               |
| 678 | When do you think you might get next batch of boxes (Push system)?                                                           | Less than 2 weeks ..... 1<br>2 weeks to 1 month ..... 2<br>1 to 2 months ..... 3<br>More than 2 months ..... 4                                                                                                                                                                                                         | <input type="checkbox"/> |               |
| 679 | Currently, do you or your staff order medicines for the health facility?                                                     | Yes ..... 1<br>No ..... 2                                                                                                                                                                                                                                                                                              | <input type="checkbox"/> |               |
| 680 | If yes, from where do you order most of the drugs used in the facility?                                                      | Referral health facility / Hospital ..... 1<br>Provincial / district health office ..... 2<br>Area Medical store ..... 3<br>Provincial Medical Store ..... 4<br>NDoH ..... 5                                                                                                                                           | <input type="checkbox"/> |               |
| 681 | When did you order drugs last time?                                                                                          | Less than a month ago ..... 1<br>1 month to less than 2 months ..... 2<br>2 months to less than 3 months ..... 3<br>3 months to less than 4 months ..... 4<br>4 months to less than 6 months ..... 5<br>6 months to less than 9 months ..... 6<br>9 months to less than 1 year ..... 7<br>More than 1 year ago ..... 8 | <input type="checkbox"/> |               |
| 682 | Where did you order for the drug last time?                                                                                  | Referral health facility / Hospital ..... 1<br>Provincial / district health office ..... 2<br>Area Medical store ..... 3<br>Provincial Medical Store ..... 4<br>NDoH ..... 5                                                                                                                                           | <input type="checkbox"/> |               |
| 683 | The previous order you received (not the last order), how long it took for the drugs to arrive after the placement of order? | Less than 2 weeks ..... 1<br>2 weeks to 1 month ..... 2<br>1 to 2 months ..... 3<br>More than 2 months ..... 4                                                                                                                                                                                                         | <input type="checkbox"/> |               |
| 684 | Do you always get the drugs you ordered?                                                                                     | Yes ..... 1<br>No ..... 2                                                                                                                                                                                                                                                                                              | <input type="checkbox"/> | If 2<br>→ 691 |
| 685 | On average, what percentage of drugs ordered are received?                                                                   | Percent of drugs ordered received                                                                                                                                                                                                                                                                                      | _ _                      |               |

|                                          |                                                                                                                                                             |                                                                                                                                                   |                                   |  |
|------------------------------------------|-------------------------------------------------------------------------------------------------------------------------------------------------------------|---------------------------------------------------------------------------------------------------------------------------------------------------|-----------------------------------|--|
| 686                                      | Who normally makes the collection from the facility?                                                                                                        | Community health worker.....1<br>Volunteer.....2<br>Nurse.....3<br>Brought to the facility by suppliers.....4                                     | <input type="checkbox"/>          |  |
| 687                                      | How is the drug delivered to the facility?                                                                                                                  | Facility gets the drug from medical store/NDoH....1<br>Medical store/NDoH delivers to the facility.....2<br>Others deliver to the facility .....3 | <input type="checkbox"/>          |  |
| 688                                      | How do you pay the expenses for collecting drugs ordered?                                                                                                   | Province.....1<br>Own budget.....2<br>Referral health facility .....3<br>Others .....4                                                            | <input type="checkbox"/>          |  |
| 689                                      | How much does it cost (all expenses) on one average pick up?                                                                                                | PNG Kina<br>Don't Know: 99999                                                                                                                     | _ _ _ _                           |  |
| 690                                      | Where did you go last time to collect medical supplies?                                                                                                     | Please specify                                                                                                                                    | _ _                               |  |
| <b>Medical Supply Kits (Push System)</b> |                                                                                                                                                             |                                                                                                                                                   |                                   |  |
| 691                                      | What month and year did you receive your last round of medical supply kits?                                                                                 | Month<br>Year                                                                                                                                     | _ _ <br> _ _                      |  |
| 692                                      | Were the medical supply kits delivered directly or did the facility pick up the kits?                                                                       | Delivered .....1<br>Picked up.....2                                                                                                               | <input type="checkbox"/>          |  |
| 693                                      | List three drugs that you think are more than enough based on needs here in the facility<br>WRITE NAME AND CODE OF THE DRUGS FROM THE SUPPLY KITS DRUG LIST | A _____<br>B _____<br>C _____                                                                                                                     | _ _ _ _ <br> _ _ _ _ <br> _ _ _ _ |  |
| 694                                      | List three drugs that you think are not enough based on needs in the facility?<br>WRITE NAME AND CODE OF THE DRUGS FROM THE SUPPLY KITS DRUG LIST           | A _____<br>B _____<br>C _____                                                                                                                     | _ _ _ _ <br> _ _ _ _ <br> _ _ _ _ |  |
| <b>Purchased Drugs</b>                   |                                                                                                                                                             |                                                                                                                                                   |                                   |  |
| 695                                      | Have you purchased additional medicines or medical supplies this year?                                                                                      | Yes ..... 1<br>No ..... 2                                                                                                                         | <input type="checkbox"/>          |  |
| 696                                      | If yes, how did you pay for this purchase?                                                                                                                  | Request province.....1<br>Own budget.....2<br>Referral health facility .....3                                                                     | <input type="checkbox"/>          |  |
| 697                                      | How much did you spend on additional drugs in 2014?                                                                                                         | PNG Kina                                                                                                                                          | _ _ _ _                           |  |
| 698                                      | Are you planning on purchasing additional drugs in 2015?                                                                                                    | Yes ..... 1<br>No ..... 2                                                                                                                         | <input type="checkbox"/>          |  |

## Section 7.1: Availability of Essential Drugs or supplies

| SL # | Drug                                          | Question                                                                 | Response                 | Question                                                                  | Response                 |
|------|-----------------------------------------------|--------------------------------------------------------------------------|--------------------------|---------------------------------------------------------------------------|--------------------------|
|      |                                               | <b>Drugs continuously available last 30 days without any stock-outs?</b> | <b>A</b>                 | <b>Are expired drug present?</b>                                          | <b>B</b>                 |
| 701  | Panadol/ Paracetamol tablet                   | Yes .....1<br>No .....2                                                  | <input type="checkbox"/> | Yes.....1<br>No .....2<br>No expiry date ...3<br>Drug is not present ...4 | <input type="checkbox"/> |
| 702  | Paracetamol liquid                            | Yes .....1<br>No .....2                                                  | <input type="checkbox"/> | Yes.....1<br>No .....2<br>No expiry date ...3<br>Drug is not present ...4 | <input type="checkbox"/> |
| 703  | Diclofenac (pain/inflammation) capsule or tab | Yes .....1<br>No .....2                                                  | <input type="checkbox"/> | Yes.....1<br>No .....2<br>No expiry date ...3<br>Drug is not present ...4 | <input type="checkbox"/> |
| 704  | Pethidine                                     | Yes .....1<br>No .....2                                                  | <input type="checkbox"/> | Yes.....1<br>No .....2<br>No expiry date ...3<br>Drug is not present ...4 | <input type="checkbox"/> |
| 705  | Chloroquine                                   | Yes .....1<br>No .....2                                                  | <input type="checkbox"/> | Yes.....1<br>No .....2<br>No expiry date ...3<br>Drug is not present ...4 | <input type="checkbox"/> |
| 706  | Quinine Injection                             | Yes .....1<br>No .....2                                                  | <input type="checkbox"/> | Yes.....1<br>No .....2<br>No expiry date ...3<br>Drug is not present ...4 | <input type="checkbox"/> |
| 707  | Primaquine                                    | Yes .....1<br>No .....2                                                  | <input type="checkbox"/> | Yes.....1<br>No .....2<br>No expiry date ...3<br>Drug is not present ...4 | <input type="checkbox"/> |
| 708  | Amodiaquine                                   | Yes .....1<br>No .....2                                                  | <input type="checkbox"/> | Yes.....1<br>No .....2<br>No expiry date ...3<br>Drug is not present ...4 | <input type="checkbox"/> |
| 709  | Artemisinin combination                       | Yes .....1<br>No .....2                                                  | <input type="checkbox"/> | Yes.....1<br>No .....2<br>No expiry date ...3<br>Drug is not present ...4 | <input type="checkbox"/> |
| 710  | Fansidar                                      | Yes .....1<br>No .....2                                                  | <input type="checkbox"/> | Yes.....1<br>No .....2<br>No expiry date ...3<br>Drug is not present ...4 | <input type="checkbox"/> |
| 711  | Sulfadoxine tab.                              | Yes .....1<br>No .....2                                                  | <input type="checkbox"/> | Yes.....1<br>No .....2<br>No expiry date ...3<br>Drug is not present ...4 | <input type="checkbox"/> |
| 712  | Pyrimethamine tab.                            | Yes .....1<br>No .....2                                                  | <input type="checkbox"/> | Yes.....1<br>No .....2<br>No expiry date ...3<br>Drug is not present ...4 | <input type="checkbox"/> |

| SL # | Drug             | Question                                                                 | Response                 | Question                                                                  | Response                 |
|------|------------------|--------------------------------------------------------------------------|--------------------------|---------------------------------------------------------------------------|--------------------------|
|      |                  | <b>Drugs continuously available last 30 days without any stock-outs?</b> | <b>A</b>                 | <b>Are expired drug present?</b>                                          | <b>B</b>                 |
| 713  | Rifampicin       | Yes .....1<br>No .....2                                                  | <input type="checkbox"/> | Yes.....1<br>No .....2<br>No expiry date ...3<br>Drug is not present ...4 | <input type="checkbox"/> |
| 714  | Isoniazid        | Yes .....1<br>No .....2                                                  | <input type="checkbox"/> | Yes.....1<br>No .....2<br>No expiry date ...3<br>Drug is not present ...4 | <input type="checkbox"/> |
| 715  | Ethambutol       | Yes .....1<br>No .....2                                                  | <input type="checkbox"/> | Yes.....1<br>No .....2<br>No expiry date ...3<br>Drug is not present ...4 | <input type="checkbox"/> |
| 716  | Pyrazinamide     | Yes .....1<br>No .....2                                                  | <input type="checkbox"/> | Yes.....1<br>No .....2<br>No expiry date ...3<br>Drug is not present ...4 | <input type="checkbox"/> |
| 717  | Streptomycin     | Yes .....1<br>No .....2                                                  | <input type="checkbox"/> | Yes.....1<br>No .....2<br>No expiry date ...3<br>Drug is not present ...4 | <input type="checkbox"/> |
| 718  | TB blister packs | Yes .....1<br>No .....2                                                  | <input type="checkbox"/> | Yes.....1<br>No .....2<br>No expiry date ...3<br>Drug is not present ...4 | <input type="checkbox"/> |
| 719  | Oxytocin         | Yes .....1<br>No .....2                                                  | <input type="checkbox"/> | Yes.....1<br>No .....2<br>No expiry date ...3<br>Drug is not present ...4 | <input type="checkbox"/> |
| 720  | Ergometrine      | Yes .....1<br>No .....2                                                  | <input type="checkbox"/> | Yes.....1<br>No .....2<br>No expiry date ...3<br>Drug is not present ...4 | <input type="checkbox"/> |
| 721  | Lignocaine       | Yes .....1<br>No .....2                                                  | <input type="checkbox"/> | Yes.....1<br>No .....2<br>No expiry date ...3<br>Drug is not present ...4 | <input type="checkbox"/> |
| 722  | Depo-provera     | Yes .....1<br>No .....2                                                  | <input type="checkbox"/> | Yes.....1<br>No .....2<br>No expiry date ...3<br>Drug is not present ...4 | <input type="checkbox"/> |
| 723  | Ferrous sulphate | Yes .....1<br>No .....2                                                  | <input type="checkbox"/> | Yes.....1<br>No .....2<br>No expiry date ...3<br>Drug is not present ...4 | <input type="checkbox"/> |
| 724  | Liniment         | Yes .....1<br>No .....2                                                  | <input type="checkbox"/> | Yes.....1<br>No .....2<br>No expiry date ...3<br>Drug is not present ...4 | <input type="checkbox"/> |

| SL # | Drug                                                         | Question                                                                 | Response                 | Question                                                                  | Response                 |
|------|--------------------------------------------------------------|--------------------------------------------------------------------------|--------------------------|---------------------------------------------------------------------------|--------------------------|
|      |                                                              | <b>Drugs continuously available last 30 days without any stock-outs?</b> | <b>A</b>                 | <b>Are expired drug present?</b>                                          | <b>B</b>                 |
| 725  | Flagyl/ Metronidazole                                        | Yes .....1<br>No .....2                                                  | <input type="checkbox"/> | Yes.....1<br>No .....2<br>No expiry date ...3<br>Drug is not present ...4 | <input type="checkbox"/> |
| 726  | Amoxicillin capsule or tablets                               | Yes .....1<br>No .....2                                                  | <input type="checkbox"/> | Yes.....1<br>No .....2<br>No expiry date ...3<br>Drug is not present ...4 | <input type="checkbox"/> |
| 727  | Co-trimoxazole oral susp or tablet                           | Yes .....1<br>No .....2                                                  | <input type="checkbox"/> | Yes.....1<br>No .....2<br>No expiry date ...3<br>Drug is not present ...4 | <input type="checkbox"/> |
| 728  | Diazepam capsule or tablet                                   | Yes .....1<br>No .....2                                                  | <input type="checkbox"/> | Yes.....1<br>No .....2<br>No expiry date ...3<br>Drug is not present ...4 | <input type="checkbox"/> |
| 729  | Amitriptyline 25 mg, capsule or tablet (depression medicine) | Yes .....1<br>No .....2                                                  | <input type="checkbox"/> | Yes.....1<br>No .....2<br>No expiry date ...3<br>Drug is not present ...4 | <input type="checkbox"/> |
| 730  | Paraldehyde                                                  | Yes .....1<br>No .....2                                                  | <input type="checkbox"/> | Yes.....1<br>No .....2<br>No expiry date ...3<br>Drug is not present ...4 | <input type="checkbox"/> |
| 731  | Albendazole tab                                              | Yes .....1<br>No .....2                                                  | <input type="checkbox"/> | Yes.....1<br>No .....2<br>No expiry date ...3<br>Drug is not present ...4 | <input type="checkbox"/> |
| 732  | Tinidazole tab                                               | Yes .....1<br>No .....2                                                  | <input type="checkbox"/> | Yes.....1<br>No .....2<br>No expiry date ...3<br>Drug is not present ...4 | <input type="checkbox"/> |
| 733  | Ciprofloxacin capsule or tablet (usually 500 mg)             | Yes .....1<br>No .....2                                                  | <input type="checkbox"/> | Yes.....1<br>No .....2<br>No expiry date ...3<br>Drug is not present ...4 | <input type="checkbox"/> |
| 734  | Crystalline penicillin injection                             | Yes .....1<br>No .....2                                                  | <input type="checkbox"/> | Yes.....1<br>No .....2<br>No expiry date ...3<br>Drug is not present ...4 | <input type="checkbox"/> |
| 735  | Ceftriaxone 1g/vial injection                                | Yes .....1<br>No .....2                                                  | <input type="checkbox"/> | Yes.....1<br>No .....2<br>No expiry date ...3<br>Drug is not present ...4 | <input type="checkbox"/> |
| 736  | Chloramphenicol injection                                    | Yes .....1<br>No .....2                                                  | <input type="checkbox"/> | Yes.....1<br>No .....2<br>No expiry date ...3<br>Drug is not present ...4 | <input type="checkbox"/> |

| SL # | Drug                                                            | Question                                                                 | Response                 | Question                                                                  | Response                 |
|------|-----------------------------------------------------------------|--------------------------------------------------------------------------|--------------------------|---------------------------------------------------------------------------|--------------------------|
|      |                                                                 | <b>Drugs continuously available last 30 days without any stock-outs?</b> | <b>A</b>                 | <b>Are expired drug present?</b>                                          | <b>B</b>                 |
| 737  | Mala wan (1)                                                    | Yes .....1<br>No .....2                                                  | <input type="checkbox"/> | Yes.....1<br>No .....2<br>No expiry date ...3<br>Drug is not present ...4 | <input type="checkbox"/> |
| 738  | Captopril, 25 mg, capsule or tab                                | Yes .....1<br>No .....2                                                  | <input type="checkbox"/> | Yes.....1<br>No .....2<br>No expiry date ...3<br>Drug is not present ...4 | <input type="checkbox"/> |
| 739  | Atenolol 50 mg, capsule or tablet (Cardiovascular disease drug) | Yes .....1<br>No .....2                                                  | <input type="checkbox"/> | Yes.....1<br>No .....2<br>No expiry date ...3<br>Drug is not present ...4 | <input type="checkbox"/> |
| 740  | Simvastatin 20 mg, capsule or tablet                            | Yes .....1<br>No .....2                                                  | <input type="checkbox"/> | Yes.....1<br>No .....2<br>No expiry date ...3<br>Drug is not present ...4 | <input type="checkbox"/> |
| 741  | Glibenclamide 5mg, capsule or tablet (for diabetes)             | Yes .....1<br>No .....2                                                  | <input type="checkbox"/> | Yes.....1<br>No .....2<br>No expiry date ...3<br>Drug is not present ...4 | <input type="checkbox"/> |
| 742  | Salbutamol tab 4 mg                                             | Yes .....1<br>No .....2                                                  | <input type="checkbox"/> | Yes.....1<br>No .....2<br>No expiry date ...3<br>Drug is not present ...4 | <input type="checkbox"/> |
| 743  | CMP(Chlorpheniramine maleate) tablet                            | Yes .....1<br>No .....2                                                  | <input type="checkbox"/> | Yes.....1<br>No .....2<br>No expiry date ...3<br>Drug is not present ...4 | <input type="checkbox"/> |
| 744  | Omeprazole (capsule or tablet)                                  | Yes .....1<br>No .....2                                                  | <input type="checkbox"/> | Yes.....1<br>No .....2<br>No expiry date ...3<br>Drug is not present ...4 | <input type="checkbox"/> |
| 745  | ART for HIV/AIDS                                                | Yes .....1<br>No .....2                                                  | <input type="checkbox"/> | Yes.....1<br>No .....2<br>No expiry date ...3<br>Drug is not present ...4 | <input type="checkbox"/> |



Table 7.2: Availability and Stock-out information of other supplies

| SL #                                              |                             | Available for use today<br>(Yes=1, No=2) | Continuously available in the last 30 days<br>without any stock-outs? (Yes=1, No=2) |
|---------------------------------------------------|-----------------------------|------------------------------------------|-------------------------------------------------------------------------------------|
| Family Planning items                             |                             |                                          |                                                                                     |
| 749                                               | Family planning: Oral pills |                                          |                                                                                     |
| 750                                               | Family planning Injections  |                                          |                                                                                     |
| 751                                               | Condoms                     |                                          |                                                                                     |
| Vaccines and related items                        |                             |                                          |                                                                                     |
| 752                                               | BCG                         |                                          |                                                                                     |
| 753                                               | HEP B                       |                                          |                                                                                     |
| 754                                               | Vitamin A                   |                                          |                                                                                     |
| 755                                               | Sabin                       |                                          |                                                                                     |
| 756                                               | DTP/Hib                     |                                          |                                                                                     |
| 757                                               | Measles                     |                                          |                                                                                     |
| 758                                               | Tetanus Toxoid              |                                          |                                                                                     |
| 759                                               | Iron tablet or folic acid   |                                          |                                                                                     |
| Availability of Kits for Malaria, TB and HIV/AIDS |                             |                                          |                                                                                     |
| 760                                               | HIV/AIDS Test Kit           |                                          |                                                                                     |
| 761                                               | RDT Test kit for Malaria    |                                          |                                                                                     |
| 762                                               | TB Category 1 kit           |                                          |                                                                                     |
| 762                                               | TB Category 2 kit           |                                          |                                                                                     |
| Other items                                       |                             |                                          |                                                                                     |
| 763                                               | ORS for diarrhea            |                                          |                                                                                     |
| 764                                               | HS Darrows                  |                                          |                                                                                     |
| 765                                               | Oxygen                      |                                          |                                                                                     |
| 766                                               | Baby/scale book             |                                          |                                                                                     |
| 767                                               | Mother's health book        |                                          |                                                                                     |
| 768                                               | Quarterly TB report book    |                                          |                                                                                     |
| 769                                               | Monthly report forms        |                                          |                                                                                     |
| 770                                               | Health center record books  |                                          |                                                                                     |
| 771                                               | Daily summary book          |                                          |                                                                                     |

## Section 7.3: EPI and Cold Chain

| No  | Questions and Filters                                                                                                                        | Coding categories                                                                                                      | Response                 | Skip         |
|-----|----------------------------------------------------------------------------------------------------------------------------------------------|------------------------------------------------------------------------------------------------------------------------|--------------------------|--------------|
| 772 | Does this facility provide EPI services?                                                                                                     | Yes ..... 1<br>No ..... 2                                                                                              | <input type="checkbox"/> | If 2<br>→801 |
| 773 | Does this facility provide opportunistic immunizations (i.e., immunization provided when an unimmunized child shows up)?                     | Yes ..... 1<br>No ..... 2                                                                                              | <input type="checkbox"/> |              |
| 774 | Are child immunizations regularly given to children at this facility or in outreach EPI activities?                                          | Yes, at facility only ..... 1<br>Yes, at outreach only ..... 2<br>Yes, both facilities & outreach ..... 3              | <input type="checkbox"/> | If 1<br>→777 |
| 775 | How many EPI outreach activities were conducted in the past 3 months?                                                                        | Number EPI outreach activities                                                                                         | _ _ _                    |              |
| 776 | How many children were vaccinated during past three months and what proportion of total children was vaccinated through outreach activities? | A. Total immunized<br><br>B. % immunize through outreach                                                               | _ _ _ <br><br> _ _ _     |              |
| 777 | How is the main vaccine refrigerator powered?                                                                                                | None ..... 1<br>Fuel ..... 2<br>Electric ..... 3<br>Solar ..... 4<br>Gas ..... 5<br>Other ..... 6<br><i>Specify</i>    | <input type="checkbox"/> | If 1<br>→782 |
| 778 | Is the main vaccine refrigerator working?                                                                                                    | Yes ..... 1<br>No ..... 2                                                                                              | <input type="checkbox"/> |              |
| 779 | Is the main vaccine thermometer present and working?                                                                                         | Yes ..... 1<br>No ..... 2                                                                                              | <input type="checkbox"/> |              |
| 780 | Is a temperature log kept                                                                                                                    | At least twice a day for past 30 days ..... 1<br>Less than twice a day readings ..... 2<br>No vaccine log kept ..... 3 | <input type="checkbox"/> | If 1<br>→782 |
| 781 | # of days in the past month in which refrigerator temp over 8°C or under 0°C                                                                 | Number of days<br>Don't know ..... 98                                                                                  | _ _                      |              |
| 782 | Are most of the cold boxes/vaccine carriers functional /working?                                                                             | Almost all working ..... 1<br>Most not working ..... 2<br>Do not have ..... 3                                          | <input type="checkbox"/> |              |
| 783 | Are ice packs present and in good condition?                                                                                                 | Present, good condition ..... 1<br>Present, not good condition ..... 2<br>Not present ..... 3                          | <input type="checkbox"/> |              |
| 784 | Are adequate immunization cards present for at least 30 days? (Based on estimation by in-charge)                                             | Yes ..... 1<br>No ..... 2                                                                                              | <input type="checkbox"/> |              |

## Section 8.1 Health Outreach Patrols

| SL No | Questions and Filters                                                                                                                                          | Coding categories                                                                                                                                   | Response                                  | Skip          |
|-------|----------------------------------------------------------------------------------------------------------------------------------------------------------------|-----------------------------------------------------------------------------------------------------------------------------------------------------|-------------------------------------------|---------------|
| 801   | Does this facility conduct outreach patrols in the community?                                                                                                  | Yes ..... 1<br>No ..... 2                                                                                                                           | <input type="checkbox"/>                  | If 2<br>→ 822 |
| 802   | How many health outreach patrols to villages were planned in 2014?                                                                                             | Number of days<br>Don't know ..... 998                                                                                                              | _ _ _ _                                   |               |
| 803   | How many health outreach patrols to villages were conducted in 2014?                                                                                           | Number of days<br>Don't know ..... 998                                                                                                              | _ _ _ _                                   |               |
| 804   | How many for each of the following types conducted in 2014?                                                                                                    | A. Maternal and child health (MCH)<br><br>B. Immunization<br><br>C. Joint outreach clinics                                                          | _ _ _ _ <br><br> _ _ _ _ <br><br> _ _ _ _ |               |
| 805   | If the number conducted is less than the number planned, what are the reasons?                                                                                 | Lack of funds ..... 1<br>Lack of fuel ..... 2<br>Lack of staff ..... 3<br>Unwillingness of staff to travel ..... 4                                  | <input type="checkbox"/>                  |               |
| 806   | How many villages/patrol sites are reached on a typical patrol?                                                                                                | Number<br>Don't know ..... 98                                                                                                                       | _ _ _                                     |               |
| 807   | What is the typical average time taken to conduct one patrol? i.e., how long are health workers normally away from the facility at a time.                     | Half day ..... 1<br>One day ..... 2<br>Two days ..... 3<br>Three days ..... 4<br>More than three days ..... 5                                       | <input type="checkbox"/>                  |               |
| 808   | Do health workers receive an allowance to go out on patrol?                                                                                                    | Yes .....<br>No ..... 2                                                                                                                             | <input type="checkbox"/>                  |               |
| 809   | If yes, how much per typical patrol?                                                                                                                           | PNG Kina<br>Don't know ..... 998                                                                                                                    | _ _ _ _                                   |               |
| 810   | Are porters / volunteers / casual health staff used to help this facility carry out patrols?                                                                   | Yes ..... 1<br>No ..... 2                                                                                                                           | <input type="checkbox"/>                  |               |
| 811   | Is the health information gathered from conducting a patrol incorporated into monthly reporting for this health facility?                                      | Yes .....<br>No ..... 2                                                                                                                             | <input type="checkbox"/>                  |               |
| 812   | What proportion of total catchment population is served either through the facility or the outreach patrols in a quarter?                                      | Almost all served ..... 1<br>Majority served ..... 2<br>More than quarter served ..... 3<br>Less than quarter served ..... 4<br>None served ..... 5 | <input type="checkbox"/>                  |               |
| 813   | What proportion of total catchment population do you think live in "remote areas" (at least a day's walk from an operational road)?                            | % of population                                                                                                                                     | _ _ _ _                                   |               |
| 814   | What proportion of the "remote areas" population covered?                                                                                                      | % of population                                                                                                                                     | _ _ _ _                                   |               |
| 815   | Do you receive support and involvement from 'higher levels' (i.e. hospitals, district health office) such as doctors, specialists accompanying you on patrols? | Yes .....<br>No ..... 2                                                                                                                             | <input type="checkbox"/>                  |               |

| SL No | Questions and Filters                                                                                                                                            | Coding categories                                                                                                                                                     | Response                 | Skip          |
|-------|------------------------------------------------------------------------------------------------------------------------------------------------------------------|-----------------------------------------------------------------------------------------------------------------------------------------------------------------------|--------------------------|---------------|
| 816   | If yes, please specify the designation of that personnel<br>RECORD 1 IF THE PERSONNEL ACCOMPANIED AND 2 IF NOT ACCOMPANIED                                       | A. Doctor<br>B. Specialist<br>C. Administrators/ Managers<br>D. Other health personnel<br>E. Security personnel<br>F. Other _____<br>Specify                          |                          |               |
| 817   | In your opinion, has the system of conducting regular outreach patrols to rural and remote communities in the past five years gotten better, worse or stagnated? | Better.....1<br>Stagnated.....2<br>Worse.....3                                                                                                                        | <input type="checkbox"/> |               |
| 818   | The reasons for this change over the last five years<br>RECORD 1 IF THE REASON IS MENTIONED AND 2 IF NOT MENTIONED                                               | A. Availability of funds<br>B. Availability of transportation<br>C. Availability of staff<br>D. Weather<br>E. Unrest<br>F. Other _____<br>Specify                     |                          |               |
| 819   | If a health patrol finds very sick patients in remote areas, what action is normally taken?                                                                      | Ask community for help .....1<br>Call health centre.....2<br>Report back to health facility. ....3<br>Other, specify. ....4                                           | <input type="checkbox"/> |               |
| 820   | Do you have the means to respond immediately to the health emergency?                                                                                            | Yes .....1<br>No .....2                                                                                                                                               | <input type="checkbox"/> | If 2<br>→ 822 |
| 821   | How do you respond to health emergencies<br>RECORD 1 IF THE WAY IS MENTIONED AND 2 IF NOT MENTIONED                                                              | A. Call ambulance or vehicle to transport patient<br>B. Call specialist from the local hospital<br>C. Inform emergency situation to NDOH<br>D. Other _____<br>Specify |                          |               |

## Section 8.2: Administration and management

| SL No | Questions and Filters                                                                                                                                                       | Coding categories                                                                                                                          | Response                                     | Skip          |
|-------|-----------------------------------------------------------------------------------------------------------------------------------------------------------------------------|--------------------------------------------------------------------------------------------------------------------------------------------|----------------------------------------------|---------------|
| 822   | How many health care providers arrived at the facility on time today (+/- 10 minutes)                                                                                       | Number of days<br>Don't know..... 9998                                                                                                     | <input type="text"/>                         |               |
| 823   | How many HEOs, nurses, midwives, and CHWs arrived on time at the facility today?                                                                                            | Number of days<br>Don't know..... 9998                                                                                                     | <input type="text"/>                         |               |
| 824   | How many doctors are present now?<br>RECORD "98" FOR THE NUMBER IF NOT KNOWN                                                                                                | A. Time now: Hour and Minute<br><br>C. Number present:                                                                                     | <input type="text"/><br><input type="text"/> |               |
| 825   | Are there enough official registers, stationery and other supplies?                                                                                                         | Yes ..... 1<br>No ..... 2                                                                                                                  | <input type="checkbox"/>                     |               |
| 826   | Are there enough forms for the admission and discharge?                                                                                                                     | Yes ..... 1<br>No ..... 2<br>Not applicable ..... 2                                                                                        | <input type="checkbox"/>                     |               |
| 827   | How many meetings of the facility staff were held in past three months?                                                                                                     | Number<br>Don't know..... 98                                                                                                               | <input type="text"/>                         |               |
| 828   | Is there a Hospital/facility community advisory committee/Village Health Committees in this area?                                                                           | Yes..... 1<br>No ..... 2                                                                                                                   | <input type="checkbox"/>                     | If 2<br>→ 831 |
| 829   | How many meetings of the Hospital/facility community advisory committee were held in past three months?                                                                     | Number held in past year<br>Don't know ..... 998                                                                                           | <input type="text"/>                         |               |
| 830   | Does the facility have written records of activities carried out by the Hospital/facility community advisory committee?                                                     | Yes ..... 1<br>No ..... 2                                                                                                                  | <input type="checkbox"/>                     |               |
| 831   | Is there an asset registry (equipment and furniture inventory)?<br><i>Ask to see the inventory; if health staff report having list but do not show it to you, circle 4.</i> | Yes..... 1<br>Present, not complete ..... 2<br>Not present ..... 3<br>Staff report having inventory but do not show it to surveyor ..... 4 | <input type="checkbox"/>                     |               |
| 832   | When was the last time inventory updated?                                                                                                                                   | Within last one month..... 1<br>With last three months..... 2<br>Within last six months..... 3<br>More than six months ago..... 4          | <input type="checkbox"/>                     |               |
| 833   | Did the health facility have to close for any reason this year?                                                                                                             | Yes ..... 1<br>No ..... 2                                                                                                                  | <input type="checkbox"/>                     | If 2<br>→ 835 |
| 834   | If yes, how long and the reason for disruption in operations.                                                                                                               | A. Days remaining closed last year:<br><br>B. Reason (please specify): _____                                                               | <input type="text"/><br><input type="text"/> |               |

## Section 8.3: Supervision

| SL No | Questions and Filters                                                                                                                                                                                                                                                             | Coding categories                                                                                                                                                                                 | Response                 | Skip         |
|-------|-----------------------------------------------------------------------------------------------------------------------------------------------------------------------------------------------------------------------------------------------------------------------------------|---------------------------------------------------------------------------------------------------------------------------------------------------------------------------------------------------|--------------------------|--------------|
| 835   | Is there at least one officially assigned external supervisor for this health facility?                                                                                                                                                                                           | Yes.....1<br>No.....2                                                                                                                                                                             | <input type="checkbox"/> | If 2<br>→838 |
| 836   | What are the designations of the supervisors who visited the health facility in the last one year and how many times did they visit?<br>RECORD THE NUMBER OF VISITS FOR EACH KIND OF SUPERVISOR IN RESPONSE COLUMN AND RECORD 00 IF NO SUPERVISION DONE BY THAT TYPE OF PERSONNEL | A. Doctor<br>B. PHO<br>C. DHA<br>D. PDCO<br>E. Maternal and Child Health<br>F. Church Health Secretary<br>G. Other _____<br>Specify                                                               |                          |              |
| 837   | What were the purpose/ reasons for latest supervisor's visit?<br>RECORD 1 IF THE REASON MENTIONED AND 2 IF NOT MENTIONED                                                                                                                                                          | A. Overall activities in the facility<br>B. Drug Storage and Distribution<br>C. Auditing the finance<br>D. Maternal/Child health Services<br>E. Immunization program<br>F. Other _____<br>Specify |                          |              |
| 838   | Does a doctor work at this health facility?                                                                                                                                                                                                                                       | Yes.....1<br>No .....2                                                                                                                                                                            | <input type="checkbox"/> | If 1<br>→840 |
| 839   | If no, how many times has a doctor visited this health facility in 2014?                                                                                                                                                                                                          | Number<br>Don't know.....998                                                                                                                                                                      | _ _ _                    |              |
| 840   | Does a Health Extension Officer work at this health facility?                                                                                                                                                                                                                     | Yes.....1<br>No .....2                                                                                                                                                                            | <input type="checkbox"/> | If 1<br>→842 |
| 841   | If no, how many times did a Health Extension Officer (HEO) visit this health facility in 2014?                                                                                                                                                                                    | Number<br>Don't know.....998                                                                                                                                                                      | _ _ _                    |              |
| 842   | Does this health facility supervise aid posts / sub-health centers?                                                                                                                                                                                                               | Yes .....1<br>No.....2                                                                                                                                                                            | <input type="checkbox"/> | If 2<br>→844 |
| 843   | If yes, how many?                                                                                                                                                                                                                                                                 | Number<br>Don't know.....998                                                                                                                                                                      | _ _ _                    |              |
| 844   | How many supervisory visits were made to these clinics in 2014?                                                                                                                                                                                                                   | Number<br>Don't know.....998                                                                                                                                                                      | _ _ _                    |              |
| 845   | How are the costs for supervisory visits paid for at the health facility?                                                                                                                                                                                                         | Request province.....1<br>Request district.....2<br>Own budget.....3<br>Referral health facility .....4                                                                                           | <input type="checkbox"/> |              |
| 846   | Are any other tasks carried out in conjunction with conducting supervisory visits?<br>RECORD 1 IF THE TASK MENTIONED AND 2 IF NOT MENTIONED                                                                                                                                       | A. Consultation to patients<br>B. MCH services<br>C. Care in Well baby Clinic<br>D. Immunization services<br>E. Other _____<br>Specify                                                            |                          |              |
| 847   | Were recommendations written in a supervision book from last supervision?                                                                                                                                                                                                         | Book present, recommendations written.....1<br>Book present, No recommendations.....2<br>No book.....3                                                                                            | <input type="checkbox"/> |              |

## Section 8.4: Autonomy [Respondent: Health Facility Manager only]

| SL No | Questions and Filters                                                                                                                                            | Coding categories                                                                                                                                                                                                                                                                                                                                                     | Response                 | Skip |
|-------|------------------------------------------------------------------------------------------------------------------------------------------------------------------|-----------------------------------------------------------------------------------------------------------------------------------------------------------------------------------------------------------------------------------------------------------------------------------------------------------------------------------------------------------------------|--------------------------|------|
| 848   | What authority do you have to make decision on expenditure of funds provided to your facility?<br>RECORD 1 IF THE DECISION MENTIONED AND 2 IF NOT MENTIONED      | A. Total amount to be spent<br>B. Reallocation of money within same category<br>C. Reallocation between exp categories<br>D. Months in which expenditures can be made<br>E. Can sign cheques to pay suppliers and other vendors                                                                                                                                       |                          |      |
| 849   | Do you need preapprovals for exercising the authorities you have related to fund allocation?                                                                     | Yes ..... 1<br>No ..... 2                                                                                                                                                                                                                                                                                                                                             | <input type="checkbox"/> |      |
| 850   | What authority do you have in decisions related to facility personnel?<br>RECORD 1 IF THE DECISION MENTIONED AND 2 IF NOT MENTIONED                              | A. Disciplinary action/reporting for poor performance<br>B. Identify needs for additional / new staff<br>C. Hiring of new staff<br>D. Determine level of payment for staff<br>E. Allocating tasks/duties to existing staff<br>F. Commending staff for good performance<br>G. Promoting staff to higher position<br>H. Dismissal of staff<br>I. Other _____<br>Specify |                          |      |
| 851   | Do you need preapprovals for exercising the authorities you have related to fund allocation?                                                                     | Yes ..... 1<br>No ..... 2                                                                                                                                                                                                                                                                                                                                             | <input type="checkbox"/> |      |
| 852   | What authority do you have in decisions on the type/organizations of service provision?<br>RECORD 1 IF THE DECISION MENTIONED AND 2 IF NOT MENTIONED             | A. Planning the schedule of services<br>B. Changing the content of services delivered<br>C. Quality of services<br>D. Operating procedures<br>E. Procedures for accessing services<br>F. Charges for services<br>G. Addition of new services<br>H. Other _____<br>Specify                                                                                             |                          |      |
| 853   | For each area of authority: are you satisfied with the level of authority you have?                                                                              | Yes ..... 1<br>No ..... 2                                                                                                                                                                                                                                                                                                                                             | <input type="checkbox"/> |      |
| 854   | If not what type of authority you think you need for improving performance of the health facility?<br>RECORD 1 IF THE AUTHORITY MENTIONED AND 2 IF NOT MENTIONED | A. Authority to generate revenue for facility<br>B. Authority to allocate budget<br>C. Authority to hire and fire staff<br>D. Authority to give reward/punishment<br>E. Authority to plan<br>F. Authority of quality assurance<br>G. Other _____<br>Specify                                                                                                           |                          |      |

**Section 8.5: Barriers to managing facility**

|     |                                                                                                            |                  |   |
|-----|------------------------------------------------------------------------------------------------------------|------------------|---|
| 856 | What are the three main constraints you face in managing this facility effectively?                        | 1.               |   |
|     |                                                                                                            | 2.               |   |
|     |                                                                                                            | 3.               |   |
|     |                                                                                                            | No problem ..... | 9 |
| 857 | Please identify three ways in which the government or your organization could help you do your job better. | 1.               |   |
|     |                                                                                                            | 2.               |   |
|     |                                                                                                            | 3.               |   |
|     |                                                                                                            | No problem ..... | 9 |
| 858 | Suggest three ways of better involving the community with the health facility activities.                  | 1.               |   |
|     |                                                                                                            | 2.               |   |
|     |                                                                                                            | 3.               |   |
|     |                                                                                                            | No problem ..... | 9 |

**Section 8.6: Facility health information systems**

| Review records for the last completed month. |                             | Record the appropriate number in the "Response" column |                                      |                                          |                                                  |                | Response |
|----------------------------------------------|-----------------------------|--------------------------------------------------------|--------------------------------------|------------------------------------------|--------------------------------------------------|----------------|----------|
|                                              |                             | 1. Do not provide the service, no register             | 2. Register Present, fully completed | 3. Register Present, not fully completed | 4. Report having but did not show it to surveyor | 5. Not present |          |
| 859                                          | ANC register                | 1                                                      | 2                                    | 3                                        | 4                                                | 5              |          |
| 860                                          | Delivery/maternity register | 1                                                      | 2                                    | 3                                        | 4                                                | 5              |          |
| 861                                          | OT register                 | 1                                                      | 2                                    | 3                                        | 4                                                | 5              |          |
| 862                                          | Blood bank register         | 1                                                      | 2                                    | 3                                        | 4                                                | 5              |          |
| 863                                          | HIV Register                | 1                                                      | 2                                    | 3                                        | 4                                                | 5              |          |
| 864                                          | TB Register                 | 1                                                      | 2                                    | 3                                        | 4                                                | 5              |          |
| 865                                          | Hospital activity report    | 1                                                      | 2                                    | 3                                        | 4                                                | 5              |          |
| 866                                          | EPI report                  | 1                                                      | 2                                    | 3                                        | 4                                                | 5              |          |
| 867                                          | Family Planning report      | 1                                                      | 2                                    | 3                                        | 4                                                | 5              |          |
| 868                                          | Leprosy report              | 1                                                      | 2                                    | 3                                        | 4                                                | 5              |          |
| 869                                          | Lab register                | 1                                                      | 2                                    | 3                                        | 4                                                | 5              |          |
| 870                                          | Morbidity/ Mortality report | 1                                                      | 2                                    | 3                                        | 4                                                | 5              |          |
| 871                                          | Malaria, Kala-azar report   | 1                                                      | 2                                    | 3                                        | 4                                                | 5              |          |
| 872                                          | Notifiable Disease report   | 1                                                      | 2                                    | 3                                        | 4                                                | 5              |          |
| 873                                          | IMCI report                 | 1                                                      | 2                                    | 3                                        | 4                                                | 5              |          |
| 874                                          | Equipment status report     | 1                                                      | 2                                    | 3                                        | 4                                                | 5              |          |
| 875                                          | Other _____                 | 1                                                      | 2                                    | 3                                        | 4                                                | 5              |          |
| 876                                          | Other _____                 | 1                                                      | 2                                    | 3                                        | 4                                                | 5              |          |
| 877                                          | Other _____                 | 1                                                      | 2                                    | 3                                        | 4                                                | 5              |          |
| 878                                          | Other _____                 | 1                                                      | 2                                    | 3                                        | 4                                                | 5              |          |
| 879                                          | Other _____                 | 1                                                      | 2                                    | 3                                        | 4                                                | 5              |          |



**Section 9: Number of cases by disease or medical conditions for the latest month (based on the latest Health Center Monthly Summary Report available)**

| SL # | Question or items                                                                                                 | Response instructions                                                                                                                                             | Record Response                                                                                                                                                                                                                                                                     | Skip          |  |  |  |  |
|------|-------------------------------------------------------------------------------------------------------------------|-------------------------------------------------------------------------------------------------------------------------------------------------------------------|-------------------------------------------------------------------------------------------------------------------------------------------------------------------------------------------------------------------------------------------------------------------------------------|---------------|--|--|--|--|
| 901  | Does the facility have monthly reports available for review (either from facility or elsewhere)?                  | Yes.....1<br>No.....2                                                                                                                                             | <input type="checkbox"/>                                                                                                                                                                                                                                                            | If 2<br>→ 904 |  |  |  |  |
| 902  | The month and year of latest monthly report available in the facility or obtained from upper administrative level | Month (MM) and<br>Year (YY)                                                                                                                                       | <table border="1" style="display: inline-table; vertical-align: middle;"><tr><td style="width: 20px; height: 20px;"></td><td style="width: 20px; height: 20px;"></td></tr><tr><td style="width: 20px; height: 20px;"></td><td style="width: 20px; height: 20px;"></td></tr></table> |               |  |  |  |  |
|      |                                                                                                                   |                                                                                                                                                                   |                                                                                                                                                                                                                                                                                     |               |  |  |  |  |
|      |                                                                                                                   |                                                                                                                                                                   |                                                                                                                                                                                                                                                                                     |               |  |  |  |  |
| 903  | Is the latest monthly report complete?                                                                            | All fields are recorded/completed.....1<br>Most of the fields completed.....2<br>Most of the fields not completed.....3<br>Only very few items are recorded.....4 | <input type="checkbox"/>                                                                                                                                                                                                                                                            |               |  |  |  |  |

**Table 9.1: Outpatients (from monthly report)**

| SL No | Diseases                                 | Male (Number of cases)   | Female (Number of cases) |
|-------|------------------------------------------|--------------------------|--------------------------|
|       |                                          | A                        | B                        |
| 904   | Measles (suspected)                      | <input type="checkbox"/> | <input type="checkbox"/> |
| 905   | Pertussis                                | <input type="checkbox"/> | <input type="checkbox"/> |
| 906   | Simple cough                             | <input type="checkbox"/> | <input type="checkbox"/> |
| 907   | Pneumonia (<1 year)                      | <input type="checkbox"/> | <input type="checkbox"/> |
| 908   | Pneumonia ( 1-4 yrs)                     | <input type="checkbox"/> | <input type="checkbox"/> |
| 909   | Pneumonia (5 yrs+)                       | <input type="checkbox"/> | <input type="checkbox"/> |
| 910   | Chronic Obstructive Pulmonary Diseases   | <input type="checkbox"/> | <input type="checkbox"/> |
| 911   | Asthma                                   | <input type="checkbox"/> | <input type="checkbox"/> |
| 912   | Other upper respiratory tract infections | <input type="checkbox"/> | <input type="checkbox"/> |
| 913   | Diarrhea (<1 year)                       | <input type="checkbox"/> | <input type="checkbox"/> |
| 914   | Diarrhea (1-4 yrs)                       | <input type="checkbox"/> | <input type="checkbox"/> |
| 915   | Diarrhea (5 yrs+)                        | <input type="checkbox"/> | <input type="checkbox"/> |
| 916   | Malaria (<1 year)                        | <input type="checkbox"/> | <input type="checkbox"/> |
| 917   | Malaria (1-4 yrs)                        | <input type="checkbox"/> | <input type="checkbox"/> |
| 918   | Malaria (5 yrs+)                         | <input type="checkbox"/> | <input type="checkbox"/> |
| 919   | Malaria (Pregnant women)                 |                          | <input type="checkbox"/> |
| 920   | Pyrexia (Fever) of unknown cause (PUO)   | <input type="checkbox"/> | <input type="checkbox"/> |
| 921   | Anaemia                                  | <input type="checkbox"/> | <input type="checkbox"/> |
| 922   | Malnutrition (<1 yr)                     | <input type="checkbox"/> | <input type="checkbox"/> |
| 923   | Malnutrition (1-4 yrs)                   | <input type="checkbox"/> | <input type="checkbox"/> |
| 924   | Accident /injuries                       | <input type="checkbox"/> | <input type="checkbox"/> |
| 925   | Genital ulcers                           | <input type="checkbox"/> | <input type="checkbox"/> |
| 926   | Urethral discharge                       | <input type="checkbox"/> |                          |
| 927   | Vaginal discharge                        |                          | <input type="checkbox"/> |
| 928   | Pelvic Inflammatory Disease              |                          | <input type="checkbox"/> |
| 929   | Genital warts                            | <input type="checkbox"/> | <input type="checkbox"/> |
| 930   | Latent syphilis (blood test)             | <input type="checkbox"/> | <input type="checkbox"/> |
| 931   | Other STI                                | <input type="checkbox"/> | <input type="checkbox"/> |

| SL No | Diseases or medical conditions                                  | Male (Number of cases) | Female (Number of cases) |
|-------|-----------------------------------------------------------------|------------------------|--------------------------|
|       |                                                                 | A                      | B                        |
| 932   | Pulmonary TB suspect                                            | _ _ _ _ _ _ _          | _ _ _ _ _ _ _            |
| 933   | Pulmonary TB confirmed by sputum test                           | _ _ _ _ _ _ _          | _ _ _ _ _ _ _            |
| 934   | Leprosy                                                         | _ _ _ _ _ _ _          | _ _ _ _ _ _ _            |
| 935   | Yaws                                                            | _ _ _ _ _ _ _          | _ _ _ _ _ _ _            |
| 936   | Other skin diseases                                             | _ _ _ _ _ _ _          | _ _ _ _ _ _ _            |
| 937   | Ear infections (including both middle and outer ear infections) | _ _ _ _ _ _ _          | _ _ _ _ _ _ _            |
| 938   | Eye infections                                                  | _ _ _ _ _ _ _          | _ _ _ _ _ _ _            |
| 939   | All other new cases                                             | _ _ _ _ _ _ _          | _ _ _ _ _ _ _            |

Table 9.2: Inpatients (Number of discharges from monthly report)

| SL No | Diseases or medical conditions                | Male (discharges) | Female (discharges) |
|-------|-----------------------------------------------|-------------------|---------------------|
|       |                                               | A                 | B                   |
| 940   | Diphtheria                                    | _ _ _ _ _ _ _     | _ _ _ _ _ _ _       |
| 941   | Neonatal Tetanus                              | _ _ _ _ _ _ _     | _ _ _ _ _ _ _       |
| 942   | Acute Flaccid Paralysis                       | _ _ _ _ _ _ _     | _ _ _ _ _ _ _       |
| 943   | Measles (suspected)                           | _ _ _ _ _ _ _     | _ _ _ _ _ _ _       |
| 944   | Pertussis                                     | _ _ _ _ _ _ _     | _ _ _ _ _ _ _       |
| 945   | Neonatal sepsis                               | _ _ _ _ _ _ _     | _ _ _ _ _ _ _       |
| 946   | Pneumonia (<1 year)                           | _ _ _ _ _ _ _     | _ _ _ _ _ _ _       |
| 947   | Pneumonia ( 1-4 yrs)                          | _ _ _ _ _ _ _     | _ _ _ _ _ _ _       |
| 948   | Pneumonia ( 5 yrs+)                           | _ _ _ _ _ _ _     | _ _ _ _ _ _ _       |
| 949   | Chronic Obstructive Pulmonary Diseases        | _ _ _ _ _ _ _     | _ _ _ _ _ _ _       |
| 950   | Asthma                                        | _ _ _ _ _ _ _     | _ _ _ _ _ _ _       |
| 951   | Other respiratory                             | _ _ _ _ _ _ _     | _ _ _ _ _ _ _       |
| 952   | Diarrhea (<1 year)                            | _ _ _ _ _ _ _     | _ _ _ _ _ _ _       |
| 953   | Diarrhea (1-4 yrs)                            | _ _ _ _ _ _ _     | _ _ _ _ _ _ _       |
| 954   | Diarrhea (5 yrs+)                             | _ _ _ _ _ _ _     | _ _ _ _ _ _ _       |
| 955   | Malaria (Clinical diagnosis) (0-4 years)      | _ _ _ _ _ _ _     | _ _ _ _ _ _ _       |
| 956   | Malaria (Clinical diagnosis) (5-14 years)     | _ _ _ _ _ _ _     | _ _ _ _ _ _ _       |
| 957   | Malaria (Clinical diagnosis) (15 yrs+)        | _ _ _ _ _ _ _     | _ _ _ _ _ _ _       |
| 958   | Malaria (Clinical diagnosis) (Pregnant)       | ██████████        | _ _ _ _ _ _ _       |
| 959   | Malaria (Slide or RDT diagnosis) (0-4 years)  | _ _ _ _ _ _ _     | _ _ _ _ _ _ _       |
| 960   | Malaria (Slide or RDT diagnosis) (5-14 years) | _ _ _ _ _ _ _     | _ _ _ _ _ _ _       |
| 961   | Malaria (Slide or RDT diagnosis) (15 yrs +)   | _ _ _ _ _ _ _     | _ _ _ _ _ _ _       |
| 962   | Malaria (Slide or RDT diagnosis) (Pregnant)   | ██████████        | _ _ _ _ _ _ _       |
| 963   | Anemia                                        | _ _ _ _ _ _ _     | _ _ _ _ _ _ _       |
| 964   | Malnutrition (<1 yr)                          | _ _ _ _ _ _ _     | _ _ _ _ _ _ _       |
| 965   | Malnutrition (1-4 yrs)                        | _ _ _ _ _ _ _     | _ _ _ _ _ _ _       |
| 966   | All accidents/injuries                        | _ _ _ _ _ _ _     | _ _ _ _ _ _ _       |

| SL No | Diseases or medical conditions      | Male (discharges) | Female (discharges) |
|-------|-------------------------------------|-------------------|---------------------|
|       |                                     | A                 | B                   |
| 967   | Typhoid                             |                   |                     |
| 968   | TB                                  |                   |                     |
| 969   | Leprosy                             |                   |                     |
| 970   | Meningitis (<1 year)                |                   |                     |
| 971   | Meningitis (1-4 years)              |                   |                     |
| 972   | Meningitis (5 years+)               |                   |                     |
| 973   | Snakebite                           |                   |                     |
| 974   | Skin diseases                       |                   |                     |
| 975   | HIV/AIDS (<5 years)                 |                   |                     |
| 976   | HIV/AIDS (5-14 years)               |                   |                     |
| 977   | HIV/AIDS (15-24 years)              |                   |                     |
| 978   | HIV/AIDS (25 years+)                |                   |                     |
| 979   | TB-HIV Patients                     |                   |                     |
| 980   | Ischemic heart diseases             |                   |                     |
| 981   | Cancer                              |                   |                     |
| 982   | Hypertension                        |                   |                     |
| 983   | Diabetes                            |                   |                     |
| 984   | Other discharges not included above |                   |                     |

Table 9.3: Family Planning Services Provided

| SL No | FP Methods and services          | New attendance in facility | Re-attendance in facility | New attendance in Aidpost | Re-attendance in Aidpost |
|-------|----------------------------------|----------------------------|---------------------------|---------------------------|--------------------------|
|       |                                  | A                          | B                         | C                         | D                        |
| 985   | Breast feeding                   |                            |                           |                           |                          |
| 986   | Com. Pill (OCP)                  |                            |                           |                           |                          |
| 987   | Injection                        |                            |                           |                           |                          |
| 988   | Ovulation                        |                            |                           |                           |                          |
| 989   | Condom                           |                            |                           |                           |                          |
| 990   | Loops/IUD                        |                            |                           |                           |                          |
| 991   | T/ligation                       |                            |                           |                           |                          |
| 992   | Vasectomy                        |                            |                           |                           |                          |
| 993   | Referred out to other facilities |                            |                           |                           |                          |

Table 9.4: Maternal, Neonatal and Child Health Services

| SL No | Antenatal care | Number |
|-------|----------------|--------|
| 994   | First visit    |        |
| 995   | Fourth visit   |        |
| 996   | Other          |        |
| 997   | First dose TT  |        |
| 998   | Second dose TT |        |
| 999   | Booster        |        |

|      | Deliveries                                                       | Number |
|------|------------------------------------------------------------------|--------|
| 1000 | Uncomplicated deliveries in health facility                      | _____  |
| 1001 | Deliveries with complications in health facility                 | _____  |
| 1002 | Transferred to hospital for pregnancy and delivery complications | _____  |
| 1003 | Birth weight <2500 grams                                         | _____  |
| 1004 | Still births                                                     | _____  |
| 1005 | Born before arrival                                              | _____  |
| 1006 | Village births attended (total)                                  | _____  |

Table 9.5 Well Baby Clinic

| SL Number | Type of service                | New attend | Re-attend |
|-----------|--------------------------------|------------|-----------|
|           |                                | A          | B         |
| 1007      | Clinic Attendances (<1 year)   | _____      | _____     |
| 1008      | Clinic Attendances (1-4 years) | _____      | _____     |

Table 9.6: Immunizations administered

| Serial No | Vaccine type administered                      | Administered in clinic or in outreach | Administered by Aidposts |
|-----------|------------------------------------------------|---------------------------------------|--------------------------|
|           |                                                | A                                     | B                        |
| 1009      | BCG (Within 24 hours of birth)                 | _____                                 | _____                    |
| 1010      | BCG (<1 week but not within 24 hours of birth) | _____                                 | _____                    |
| 1011      | BCG (> 1 week)                                 | _____                                 | _____                    |
| 1012      | Hepatitis B (Within 24 hours of birth)         | _____                                 | _____                    |
| 1013      | Hepatitis B (> 24 hours)                       | _____                                 | _____                    |
| 1014      | DTP/Hib (Hep B) (First dose < 1 year)          | _____                                 | _____                    |
| 1015      | DTP/Hib (Hep B) (Second dose < 1 year)         | _____                                 | _____                    |
| 1016      | DTP/Hib (Hep B) (Third dose < 1 year)          | _____                                 | _____                    |
| 1017      | DTP/Hib (Hep B) (> 1 year)                     | _____                                 | _____                    |
| 1018      | Sabin Polio Vaccine (First dose < 1 year)      | _____                                 | _____                    |
| 1019      | Sabin Polio Vaccine (Second dose < 1 year)     | _____                                 | _____                    |
| 1020      | Sabin Polio Vaccine (Third dose < 1 year)      | _____                                 | _____                    |
| 1021      | Sabin Polio Vaccine (> 1 year)                 | _____                                 | _____                    |
| 1022      | Measles (6-8 months)                           | _____                                 | _____                    |
| 1023      | Measles (9-11 months)                          | _____                                 | _____                    |
| 1024      | Measles (>1 year)                              | _____                                 | _____                    |
| 1025      | Vitamin A (6 months)                           | _____                                 | _____                    |
| 1026      | Vitamin A (12 months)                          | _____                                 | _____                    |
| 1027      | Vitamin A (>1 year)                            | _____                                 | _____                    |

Survey completed at: Hour \_\_\_\_\_ Minutes \_\_\_\_\_

Phone number for future contact \_\_\_\_\_
